# Supplementary material for: Gene expression profiling of extraocular muscles in primary inferior oblique overaction
Source: PeerJ journal article supplement (doi:10.7717/peerj.19474), 2025-05-28
Supplement: all_DEG.xls [file all_DEG.xls]

## Sheet: All.DEG_final
#ID	Symbol	P-10	P-16	P-17	P-18	P-19	P-2	P-21	P-22	P-3	P-9	S-1	S-11	S-12	S-13	S-14	S-15	S-20	S-6	S-7	S-8
ENSG00000002587	HS3ST1	0.183394	0.232891	0.261458	0.222997	0.224771	0.39425	0.134065	0.193568	0.38311	0.221777	0.199131	0.332986	0.451034	0.397593	0.433707	0.406676	0.445793	0.374411	0.386502	0.570791
ENSG00000142920	AZIN2	1.38134	2.21211	2.18564	2.50704	1.59036	1.32644	0.940843	0.959075	0.948121	1.01035	1.26321	1.84435	2.17108	0.997616	2.98079	2.00338	5.31871	1.20044	3.21021	3.41947
ENSG00000099984	GSTT2	0.609692	0.725178	0.195764	1.53231	1.83549	0.190626	1.367	1.42875	0.491383	0.835613	0.464205	5.01941	3.21781	3.16275	2.56035	2.72211	2.51971	2.25125	2.94716	1.9155
NewGene_3555	NewGene_3555	0.422478	0.29142	0.114578	0.198003	0.594764	0.167786	0.063431	0.063963	0.072511	0.220733	0.346014	0.19157	0.443478	0.799177	0.490374	0.403606	0.211022	1.98526	0.581553	0.35667
ENSG00000175463	TBC1D10C	1.07676	0.373015	1.85446	1.30985	0.714031	0.525318	0.648715	0.524819	0.340598	0.8161	0.556886	0.135557	0.522186	0.299693	0.322334	1.37729	0.512202	0.242335	0.578216	0.330187
NewGene_2985	NewGene_2985	5.40586	11.1208	10.9789	8.98677	8.18315	7.52649	3.34555	4.91453	8.07405	5.90758	5.37119	10.3013	18.4645	11.801	18.9444	19.8412	11.7081	9.10298	14.9604	14.1518
ENSG00000169436	COL22A1	0.911843	1.5353	3.92483	2.38718	2.94433	0.455805	1.16337	0.684275	0.580389	1.15031	0.280176	1.75527	3.77139	1.0294	2.59016	2.11365	7.79801	1.27806	1.83013	9.035
ENSG00000169989	TIGD4	0.779652	1.23185	2.17519	1.30071	1.88087	0.757162	0.29159	0.529332	0.775386	0.593489	0.51794	1.21875	2.40099	0.744804	2.13842	2.03725	4.09496	1.29801	3.34384	3.88454
NewGene_2504	NewGene_2504	0.337288	0.187678	0.391137	1.69369	0.945973	0.21797	0.074699	0	0.047806	0	0.387475	0.562006	0.153453	0.463051	4.88058	3.61291	3.78615	0.561481	2.09884	1.44689
ENSG00000157214	STEAP2	0.350061	1.34389	1.53052	3.34171	2.457	0.653668	0.69567	0.736989	0.424334	0.354642	1.2821	1.04867	2.23451	1.16388	1.78569	2.62552	4.81067	0.987557	2.98046	3.45889
NewGene_8633	NewGene_8633	1.33731	1.35249	1.95852	0.959486	1.30601	1.83033	2.54285	2.53768	1.48405	1.14648	1.2172	4.01895	3.23465	2.2943	1.6715	2.48645	2.32717	1.76371	2.50624	3.9135
ENSG00000188517	COL25A1	3.81782	5.10579	6.51047	2.50239	3.74753	3.4047	3.4427	2.80243	2.98958	3.73757	4.17309	4.41608	9.13783	4.60318	9.15205	6.74065	8.45476	7.42065	6.96706	13.3862
ENSG00000118271	TTR	2.68757	7.3869	6.24075	9.95072	12.1614	7.64418	5.96174	7.0579	7.85562	3.07785	5.69856	2.03225	1.74388	1.79537	8.91682	5.47693	2.18976	5.81266	2.85578	2.36773
NewGene_8173	NewGene_8173	2.79243	2.64351	2.76729	4.77383	3.88365	4.15822	2.30837	4.51398	3.84674	3.23328	2.98366	3.31938	1.81932	2.93457	2.01599	3.08221	0.580182	2.48186	1.36499	1.52058
ENSG00000183479	TREX2	0.356114	1.27205	0.307868	0.767742	0.308426	0.382199	0.487944	1.56406	0.176756	0.607676	1.6603	0.56399	1.06698	0.616969	1.07731	0.488772	2.04456	0.956231	1.25482	1.20052
ENSG00000188488	SERPINA5	13.9696	11.1303	12.1258	23.3735	25.0405	12.2909	14.6701	12.7581	13.9686	12.3101	18.3086	5.31141	15.6268	5.58342	10.9615	11.418	9.30181	5.15222	8.8975	7.02229
NewGene_1765	NewGene_1765	0.287981	0.485353	0.818625	0.701518	0.577603	0.668002	0.545384	0.473799	0.384772	0.470358	0.495384	0.757367	1.27913	0.582095	1.58896	0.389249	0.643112	0.324776	1.84447	1.98034
NewGene_8405	NewGene_8405	0.618815	0.230382	0.259102	0.771781	0.800115	0.664011	0.473234	0.610597	0.6901	0.638991	0.551432	1.20205	0.772562	0.513068	0.591809	0.963715	0.769124	1.72394	0.594449	0.776663
ENSG00000185634	SHC4	0.417079	0.491858	0.588031	0.625152	1.16867	0.857959	0.616539	0.42467	0.61302	0.651587	0.24053	0.205706	0.271557	0.386658	0.761116	0.338136	0.403963	0.31994	0.483753	0.701356
ENSG00000124479	NDP	2.72645	3.91452	3.98979	3.43344	3.8573	2.93314	2.78566	3.95821	2.83296	1.96276	3.29072	3.63923	8.42522	8.11139	6.21904	8.38447	4.14496	5.06153	5.49501	7.18349
ENSG00000130203	APOE	2.44354	3.60331	3.69467	4.97402	2.99221	3.68705	2.44078	4.96768	4.43234	2.85669	1.22381	5.25958	17.5676	3.91962	8.35982	4.5641	11.1263	2.34435	8.43984	8.68486
ENSG00000143994	ABHD1	5.21349	4.09992	3.70854	3.38232	4.14723	3.54225	5.01403	5.98864	3.37437	6.27482	4.62301	2.65242	2.84715	2.23269	2.51166	2.14733	2.66547	3.86943	3.13556	2.48037
ENSG00000139549	DHH	0.523682	0.559428	0.44531	0.200593	1.03049	0.921521	0.515793	0.308801	0.712504	0.776187	0.17252	0.341064	0.413684	0.313307	0.501679	0.486829	0.454956	0.533613	0.182739	0.756156
ENSG00000185668	POU3F1	0.970616	0.3375	0.629335	0.571917	1.60629	1.18759	0.878767	0.352657	1.22474	1.04779	0.656673	0.370295	0.523548	0.715439	1.34418	0.278175	0.460443	0.388257	0.474943	0.73382
ENSG00000187624	C17orf97	1.97094	1.94005	2.50026	2.24749	1.7031	0.738735	2.44753	2.49668	0.745163	2.39296	1.33546	0.739661	0.83855	0.4842	0.961826	0.586511	0.926316	0.807363	0.935814	0.985795
NewGene_4885	NewGene_4885	0.583444	0.243673	0.226314	0.444612	0.631973	0.628717	0.556463	0.858459	0.396222	0.842961	1.50581	1.1881	0.690443	1.51972	0.93214	0.468331	0.667672	1.89051	0.600596	1.31797
NewGene_3521	NewGene_3521	0.598962	1.24561	0.898836	0.204087	0.955793	0.242265	0.807297	0.784711	0.406959	1.12349	0.496723	0.184961	0.046808	0.242284	0.389931	0.202922	0.386347	0.28947	0.311248	0.725915
ENSG00000165887	ANKRD2	1.66461	1.05871	1.46041	0.493115	0.649641	0.879814	0.752513	0.059736	1.36059	2.13764	1.63594	1.81176	0.518034	1.83855	1.23823	1.4333	8.00042	3.31523	1.47241	1.94264
ENSG00000075213	SEMA3A	0.857184	1.15527	1.41036	1.38537	1.31771	0.61813	0.491781	0.269943	0.700302	1.02778	0.859652	1.45626	1.51462	0.855341	1.68602	0.9175	1.6241	2.35746	1.62295	1.83677
ENSG00000148408	CACNA1B	0.075842	0.298695	0.140273	0.060042	0.300457	0.080606	0.103844	0.041487	0.052056	0.06914	0.090146	0.12182	0.230688	0.175803	0.065928	0.172731	0.224345	0.175739	0.288018	0.273099
ENSG00000164007	CLDN19	1.43733	0.599558	0.206157	0.441301	2.00734	1.60655	0.820708	0.425641	1.40742	1.22373	0.286425	0.689751	0.369198	0.419265	1.01374	0.279547	0.228102	0.38602	0.071495	0.299421
NewGene_3224	NewGene_3224	2.81585	1.76252	1.68541	2.0328	1.70583	2.18359	2.08411	1.96024	1.67927	2.24097	0.79236	1.06392	1.30067	1.48473	0.795094	0.96228	0.779044	0.728223	1.08416	1.26036
NewGene_5337	NewGene_5337	0.297935	0.903456	0.886174	0.246959	0.220102	0.205529	0.288435	0.320077	0.27666	0.25173	0.715784	0.280863	4.71005	6.19911	1.4555	6.39168	1.69025	2.7872	1.91799	2.25348
ENSG00000146250	PRSS35	0.497621	0.395035	0.48953	0.628352	0.281691	0.425099	0.603948	0.428271	0.272058	0.291846	0.202613	0.653409	0.73737	0.554869	1.19125	0.417737	2.18321	0.649302	0.95726	1.55951
ENSG00000112379	ARFGEF3	1.18617	0.862447	0.990302	1.11303	1.16342	0.636107	0.772071	0.414498	0.468143	1.3819	0.651221	0.922554	1.86881	0.73683	1.25365	1.24823	3.03821	1.56959	1.05554	2.57191
ENSG00000149573	MPZL2	1.46039	2.80386	2.02529	1.98062	3.73571	7.50601	2.75866	1.78851	7.81933	1.7244	1.74527	1.33205	1.87028	2.71219	2.18987	1.04814	3.98302	2.11294	1.55727	2.19546
ENSG00000115165	CYTIP	2.56067	7.84933	9.5303	9.80409	12.9301	7.75003	7.06704	5.32692	9.71758	2.01727	3.68551	2.33121	5.29462	2.97399	5.03741	10.6491	8.46589	3.14731	2.8251	4.24438
ENSG00000122254	HS3ST2	0.437852	1.74883	2.13439	0.634501	0.394025	0.419912	0.717248	0.729539	0.453226	0.953763	0.329207	0.372501	0.605179	0.201822	0.424572	1.1578	0.771266	0.121697	0.473753	0.347431
NewGene_3559	NewGene_3559	1.98902	0.652015	1.13305	2.47636	1.5086	0.575414	1.47213	1.9456	0.460228	2.31692	1.43502	2.20796	1.92259	3.02733	1.72536	1.10085	1.55157	4.4684	1.60787	1.14295
NewGene_532	NewGene_532	0.176949	0.973718	0.861712	0.505678	0.452539	0.638077	0.718862	0.449047	0.592125	0.270481	0.738345	0.989549	0.526357	1.21038	1.42711	0.564427	0.496059	1.46921	1.05275	0.881585
ENSG00000196169	KIF19	0.721256	0.597713	0.543888	0.5042	1.58717	1.02589	1.10821	0.443673	0.893793	0.831396	0.445629	0.310087	0.341533	0.476542	0.94693	0.320564	0.481027	0.525384	0.182211	0.429451
ENSG00000036448	MYOM2	2.48104	1.74414	1.90555	1.48209	1.47593	1.58877	1.10859	0.743563	1.24861	3.0309	0.970497	0.820491	1.26907	2.05836	1.33279	0.808862	0.628469	0.886703	0.994263	1.60154
NewGene_1481	NewGene_1481	3.55602	2.10326	1.63146	2.54955	2.11421	3.24238	2.76484	3.12848	2.30332	2.68651	4.70767	1.93641	0.590514	1.9565	1.22759	1.11486	1.13105	1.46094	0.809079	0.52485
ENSG00000148488	ST8SIA6	0.982494	0.83456	1.00018	0.363868	1.02527	1.0086	1.21096	1.01271	1.1304	0.639312	0.546969	1.74112	1.87678	1.0738	1.17192	0.98452	1.84303	2.24577	1.08453	2.07129
ENSG00000129744	ART1	2.67465	1.25089	1.84557	0.968472	1.50255	0.656201	4.31988	2.63191	1.38085	1.56467	0.841225	1.74707	0.867661	0.948036	1.50653	1.4519	1.0496	1.09784	1.40058	1.6916
ENSG00000013573	DDX11	0.274562	0.354342	0.601462	0.194584	0.412521	0.243998	0.320902	0.23872	0.148639	0.506086	0.147244	0.196543	0.455704	1.12571	0.292465	0.584003	2.00373	0.226408	1.59162	2.68476
ENSG00000166257	SCN3B	4.94754	7.08676	9.29355	5.17295	5.30885	4.98364	6.01438	4.95158	5.34532	4.51153	5.56577	5.87382	10.6237	8.70584	8.79707	9.90675	11.7546	10.1914	5.93182	13.4604
ENSG00000181408	UTS2R	1.79395	1.86581	2.75573	4.728	2.75558	0.953955	1.38313	1.08843	1.1686	1.96448	1.08624	1.02011	2.59491	1.20593	5.05832	4.18763	7.42916	1.5589	2.6547	7.12939
ENSG00000123612	ACVR1C	0.216187	0.127844	0.212207	0.291012	0.418571	0.354134	0.28148	0.199793	0.176317	0.151855	0.141861	0.177081	0.216966	0.176889	0.30412	0.166512	0.141763	0.070053	0.087188	0.07921
ENSG00000120057	SFRP5	4.50311	5.1398	3.0148	3.41997	8.55332	6.68558	7.41273	4.15682	6.7013	4.29496	3.04794	1.96042	3.63252	1.48914	4.86111	3.08268	3.15058	2.42144	2.56172	4.69217
NewGene_10789	NewGene_10789	0.387981	2.36395	1.77334	3.33915	1.41042	0.381029	0.863697	0.591563	0.636985	1.0034	1.0654	1.13874	2.29102	1.84017	1.9871	5.33628	6.95722	0.955888	3.50062	2.99129
ENSG00000126860	EVI2A	0.836626	1.17963	1.98929	2.65596	2.68594	1.34831	0.707982	0.826826	2.00776	1.22484	0.614712	0.671379	0.647208	0.260083	0.656321	1.31279	2.08686	0.542903	2.34828	0.607222
ENSG00000150551	LYPD1	1.00877	2.69826	2.56494	2.7692	1.8114	1.02969	0.314679	0.315547	0.507818	0.861412	0.187047	0.671184	2.33634	0.645043	3.22248	2.87044	7.96594	1.19989	3.8814	6.01569
ENSG00000198223	CSF2RA	0.297952	0.467798	0.919584	1.47303	0.965698	0.627952	0.570954	0.537185	0.540336	0.382558	0.352106	0.094962	0.25967	0.090868	0.340691	0.542296	0.697087	0.231763	0.622426	0.714199
ENSG00000168071	CCDC88B	0.319404	0.469154	1.00017	1.06676	0.979652	0.204383	0.392692	0.416992	0.264105	0.559132	0.387459	0.07467	0.394013	0.59917	0.300933	0.347845	0.221593	0.264132	0.507023	0.710436
ENSG00000105784	RUNDC3B	0.81171	1.15204	1.86199	1.18726	1.09842	1.39116	1.42594	1.0711	1.50366	0.734446	0.856405	1.11235	2.42809	1.63668	1.7747	3.35249	2.16882	1.87442	1.29564	2.53519
ENSG00000101203	COL20A1	0.80506	0.720662	0.424975	1.0473	1.68546	0.736031	0.610727	0.725938	1.28215	1.28294	0.339593	0.277774	0.423943	0.81683	1.68269	0.33095	0.186744	0.816686	0.356258	1.01826
ENSG00000255823	MTRNR2L8	0.92172	1.81224	1.53332	1.16122	0.941287	1.05776	0.945204	1.0732	1.41266	0.961837	1.62999	9.99706	1.25743	1.29513	1.5344	1.13908	0.906428	1.40912	1.08625	0.847198
ENSG00000170775	GPR37	2.29309	2.8229	3.92035	3.21995	7.10966	2.94084	3.9479	3.23975	3.11987	2.53637	1.4773	5.003	6.60528	6.01865	4.79919	8.38353	4.00589	12.7522	2.96657	6.91055
ENSG00000145244	CORIN	0.10173	0.289216	0.498145	0.395464	0.20852	0.129121	0.059412	0.063214	0.092094	0.059105	0.039082	0.260367	0.411285	0.236788	0.685949	0.771949	1.5303	0.272034	0.434512	1.2571
ENSG00000118849	RARRES1	1.34311	5.07276	5.66887	12.2951	3.53341	5.1882	1.97659	1.81082	4.16266	1.95511	3.84481	2.6749	11.7797	3.0214	18.2741	6.63924	8.39466	2.39914	18.7083	15.3656
ENSG00000151079	KCNA6	0.142471	0.330321	0.149685	0.133981	0.596659	0.383446	0.038734	0.03293	0.508735	0.406015	0.628794	0.368293	0.46618	0.873366	0.626043	0.384098	0.602524	1.08746	0.525767	0.582252
ENSG00000142661	MYOM3	19.026	10.8163	10.3869	11.6481	15.689	29.7225	14.5325	9.43637	27.0086	19.8043	11.3934	12.3474	15.1604	10.0767	8.59931	6.73197	10.0105	18.654	6.14464	13.4571
NewGene_6246	NewGene_6246	1.0559	0.831675	0.884495	1.33263	3.23363	0.31609	1.09359	0.256202	0.433172	1.08928	1.14851	1.32903	2.56367	1.84478	0.690989	1.64498	0.911735	1.156	1.99729	2.64397
NewGene_11810	NewGene_11810	0.283616	0.512951	0.714992	0.28677	0.605058	0.102674	0.167153	0.091475	0.117242	0.248	0.429773	0.269909	0.38431	0.265792	0.436312	0.515929	0.596479	0.551773	0.53279	1.03407
NewGene_9099	NewGene_9099	0.225408	0.3369	0.33822	0.432046	0.529617	0.133252	0.190181	0.06544	0.118512	0.240251	0.551099	0.427876	0.503338	0.234677	0.25878	0.290528	0.374789	0.493659	0.424616	0.921321
ENSG00000146477	SLC22A3	11.5403	9.14975	7.83458	7.38271	13.9793	10.4888	7.15406	4.74277	11.1187	10.4174	4.57888	3.97408	4.80683	3.56129	7.81498	3.81179	4.38009	3.5293	4.0004	5.13678
ENSG00000109956	B3GAT1	0.27919	0.165727	0.353753	0.340211	0.904785	0.446265	0.277851	0.221246	0.387563	0.272099	0.239924	0.130595	0.104448	0.289706	0.457008	0.177351	0.18346	0.149078	0.088791	0.315785
ENSG00000187527	ATP13A5	0.370864	0.310711	0.22875	0.243761	0.429051	0.150504	0.260268	0.229616	0.160636	0.382331	0.528443	0.414189	0.773797	0.516108	0.250783	0.360854	0.636795	0.337266	0.246977	0.410625
ENSG00000158859	ADAMTS4	0.110977	0.176917	0.054081	0.072888	0.116044	0.108877	0.045823	0.074748	0.118205	0.101593	0.055885	0.122437	0.083851	0.131865	0.095322	0.139165	0.135044	0.258405	0.187393	0.383448
ENSG00000175445	LPL	43.7226	27.2328	24.7778	26.5417	48.7202	37.5957	30.8963	19.1803	35.4328	40.6059	18.5916	30.9357	20.7382	28.96	26.5009	12.5701	21.1731	31.2449	11.7555	21.4117
ENSG00000060718	COL11A1	0.083983	0.521414	1.05703	1.07793	0.472383	0.318736	0.085907	0.03138	0.103486	0.200213	0.045132	0.286201	0.874771	0.160122	1.79663	1.0577	3.41004	0.122396	1.18879	2.33602
NewGene_7543	NewGene_7543	3.55101	6.61597	8.66797	4.92323	2.96116	2.16649	3.22578	3.2373	2.41438	3.09557	2.45044	1.64172	2.01077	1.05079	2.30513	7.52854	2.48301	2.3404	2.85518	2.00407
ENSG00000136872	ALDOB	0.823008	0.631765	0.487138	0.28952	0.523179	1.21663	1.24043	1.57446	1.01064	0.866908	1.08945	0.67726	0.517449	0.769966	0.572669	0.456487	0.265817	0.713403	0.174627	0.196998
ENSG00000283782	AC116366.3	1.64217	0.662014	0.993452	1.13769	0.62702	1.14325	0.896427	1.19898	1.47519	1.34004	1.66938	0.526876	3.48678	2.56346	1.10063	1.86871	0.797262	1.5802	3.21111	1.82903
ENSG00000188536	HBA2	30.78	245.622	3265.7	641.1	88.9418	94.9279	120.063	241.572	43.861	50.6463	56.2576	90.7616	120.759	46.3793	98.5483	486.726	162.105	46.0281	258.57	85.2757
NewGene_10068	NewGene_10068	0.610863	0.613744	0.426446	0.221359	0.478549	0.620919	0.205074	0.346401	0.262542	0.246968	0.282154	0.420516	0.947812	0.457013	0.636374	1.36289	0.857687	0.816485	0.679414	0.746196
NewGene_6138	NewGene_6138	3.13466	0.176756	0.376313	0.279601	0.14793	1.58574	0.979195	0.804666	1.8802	3.20093	0.364668	1.01555	0.528625	0.611948	0.778203	0.284998	1.31199	0.91051	0.368494	0.752281
NewGene_6139	NewGene_6139	6.33185	2.11243	1.92012	0.951925	1.14097	7.01882	2.67799	3.29438	5.93905	6.97982	0.288239	1.27468	2.37282	1.8471	1.78359	0.710592	1.99272	1.98614	1.23997	1.35481
ENSG00000155886	SLC24A2	0.130116	0.157196	0.270109	0.145811	0.295855	0.239978	0.154863	0.083084	0.233909	0.173277	0.155673	0.150287	0.675592	0.24337	0.240754	0.354446	0.855053	0.448011	0.15425	0.586347
ENSG00000004468	CD38	3.95554	0.809703	0.529288	1.90277	5.07511	1.82345	3.08242	2.42148	1.95155	3.60145	2.32782	2.46765	1.63229	2.45145	1.12876	1.03807	1.41864	1.17679	1.0503	1.20609
ENSG00000143194	MAEL	0.563589	0.495414	0.318953	0.348593	0.331011	0.545545	0.16095	0.328595	0.571933	0.519673	0.567297	0.580029	0.632361	0.642148	0.170653	0.934846	0.931851	0.840354	1.09547	0.962092
ENSG00000101187	SLCO4A1	3.54297	1.93556	2.3948	2.13715	3.72126	4.22791	2.79663	2.76342	3.9231	3.71882	1.88568	3.04303	1.78418	2.78165	2.9638	1.82514	1.79969	2.17005	0.771267	2.4846
ENSG00000176402	GJC3	1.94462	1.21791	0.881405	1.34654	3.91244	2.96269	1.58554	1.24403	2.91272	1.92802	1.0493	0.876507	0.578688	0.819065	2.07511	0.519217	0.866341	0.977226	0.236014	0.96468
NewGene_7168	NewGene_7168	0.097623	0.830597	0.667565	0.671956	0.244194	0.234254	0.543325	0.469102	0.312532	0.12206	1.05916	0.688207	0.79864	0.135844	0.18517	0.850325	1.58675	0.911179	0.68962	0.502597
ENSG00000244734	HBB	29.7721	251.975	3528.9	699.621	125.78	116.584	135.684	274.096	59.2973	61.1276	48.9219	116.682	150.021	62.9269	83.049	517.816	262.108	45.5751	209.607	69.0074
ENSG00000183873	SCN5A	0.146217	0.158502	0.169087	0.109954	0.239474	0.143964	0.135608	0.089908	0.121987	0.160408	0.088227	0.098187	0.224014	0.236505	0.403882	0.394762	0.501309	0.156333	0.17402	0.394083
NewGene_2591	NewGene_2591	0.282042	0.557035	0.848626	0.345119	0.24428	0.298734	0.195548	0.199815	0.393242	0.183741	0.287267	0.571235	0.716059	0.601582	0.926569	0.567308	0.940152	0.668225	0.707989	0.537885
NewGene_2594	NewGene_2594	0.409283	0.612859	0.146932	0.370839	0	0.353103	0.435879	0	0	0	0.281541	0.786008	0.733534	0.651015	0.925139	0.677022	0.974109	0.770962	0.846007	1.99368
ENSG00000174607	UGT8	0.598272	0.531452	0.362111	0.205365	1.22024	1.34253	0.419598	0.269463	0.80821	0.681937	0.16066	0.279495	0.149595	0.414172	0.729475	0.125983	0.312551	0.248609	0.188904	0.371517
ENSG00000041982	TNC	1.36629	0.786805	1.26841	0.835997	1.79787	1.3469	1.06293	1.39977	0.945481	1.16396	0.268312	1.09187	1.73098	1.09556	2.86843	1.76298	9.15484	1.51179	1.77042	4.56023
ENSG00000140678	ITGAX	0.313329	0.225521	0.916745	0.882981	0.799741	0.298114	0.352324	0.347426	0.453819	0.434662	0.250599	0.339566	0.273083	0.181779	0.271188	0.415243	0.303871	0.312106	0.490403	0.37135
ENSG00000131203	IDO1	1.24428	0.300973	0.541652	1.76667	4.1349	1.31986	0.871547	0.504698	1.29813	1.9257	0.486917	0.418102	0.274297	0.263802	0.705304	0.547747	0.475997	0.637821	1.50868	1.82678
ENSG00000070159	PTPN3	0.499928	0.887046	2.04848	0.780138	1.2142	0.323966	0.826309	0.763096	0.335462	0.268851	0.359868	0.365149	1.54681	0.670861	1.02653	1.52224	1.68139	0.884756	1.27649	2.43601
ENSG00000178075	GRAMD1C	0.262041	0.463308	0.484957	0.159702	0.211589	0.286678	0.136119	0.291659	0.217073	0.100787	0.346083	0.281125	0.357931	0.306862	0.569217	0.408525	1.00496	0.247601	0.295706	0.5487
ENSG00000176076	KCNE5	2.21374	6.7393	6.9828	1.43946	1.92403	4.22161	3.11052	3.46536	3.83212	1.9954	2.38681	0.832586	2.30072	2.16537	5.17932	2.63957	3.26324	2.00149	1.37055	1.07452
ENSG00000184454	NCMAP	2.16789	1.65472	0.648925	1.31205	4.91372	3.78533	1.92793	0.876992	3.09631	3.10076	1.10364	1.09965	0.741003	0.941429	1.3629	0.610955	0.745961	1.10369	0.249469	1.03634
NewGene_286	NewGene_286	0.724198	1.14331	1.3739	2.66421	2.736	1.39521	1.29846	0.985134	1.31072	0.632055	0.742415	0.326724	1.11401	0.394626	1.10225	0.878997	1.33611	0.191975	1.04474	0.972062
NewGene_10254	NewGene_10254	1.16137	0.619254	0.634955	0.482409	1.48098	0.679024	0.874909	0.61893	0.482178	0.863081	1.30469	0.83588	4.35062	0.762177	0.859593	0.603484	1.16926	0.882988	0.733708	1.49881
ENSG00000134917	ADAMTS8	7.70478	4.56525	7.13788	6.48019	5.47283	3.95632	3.94161	2.82918	4.1161	7.18442	3.59565	8.50622	5.96051	10.6982	6.39485	4.9809	13.7364	10.3947	4.2818	14.1231
NewGene_5572	NewGene_5572	0.914171	1.21135	1.11783	3.08346	1.76765	0.723964	0.280728	0.53995	0.655881	1.06074	1.46282	0.835819	1.81467	1.3106	2.57879	3.44343	2.69585	0.566366	3.52661	1.89472
NewGene_4622	NewGene_4622	4.22227	3.79917	2.87038	1.32335	0.856314	2.54819	2.0604	2.8729	3.48188	3.90575	10.2077	8.28822	0.725603	3.92185	5.02209	4.55484	3.01989	4.73367	7.10908	6.2873
ENSG00000170075	GPR37L1	0.198115	0.2449	0.218169	0.10632	0.378363	0.528965	0.223318	0.137117	0.370267	0.382089	0.065843	0.160609	0.145515	0.09194	0.291861	0.154866	0.094819	0.232221	0.033797	0.083243
ENSG00000254445	HSPB2-C11orf52	6.81986	3.62237	3.761	2.37192	1.00055	4.28003	5.95742	4.49251	5.89032	4.64557	3.24389	1.16481	2.0518	2.82153	2.75071	3.65659	5.30798	2.85363	2.37476	2.38206
NewGene_2912	NewGene_2912	0.616719	0.728467	0.5395	0.848318	0.834153	0.712478	0.641215	0.078556	0.483324	1.11767	0.612446	1.23566	1.52355	1.62538	0.960708	1.26896	1.21543	1.09198	0.718655	0.423607
ENSG00000171246	NPTX1	0.224643	0.260957	0.2005	0.114814	0.142727	0.160317	0.208275	0.153667	0.147013	0.146394	0.080125	0.335893	0.277193	0.059743	0.267438	0.31971	0.782512	0.139819	0.354508	0.429559
NewGene_2139	NewGene_2139	3.86854	1.37544	1.01141	5.63451	3.36439	2.6125	4.24543	4.15085	2.08023	4.28146	3.95474	1.36155	1.08367	2.51443	2.63328	1.34763	1.70616	1.92361	2.43429	2.44492
NewGene_6932	NewGene_6932	1.61011	2.42645	2.61676	1.96624	2.4348	1.33809	2.17489	3.11952	1.26705	1.38915	4.62763	3.92182	2.60865	2.30687	2.98376	4.19028	3.15638	3.16841	2.98813	3.8727
ENSG00000188716	DUPD1	7.94149	6.50097	4.12809	5.60099	6.05142	2.53472	7.4713	7.15204	2.01159	7.50559	5.81998	6.05039	6.82514	3.75436	2.13131	1.67344	3.81223	1.38427	3.59588	2.26612
ENSG00000169933	FRMPD4	0.078821	0.296499	0.190811	0.09309	0.205803	0.095839	0.070527	0.110352	0.162041	0.112657	0.065305	0.192702	0.343131	0.143257	0.255585	0.158453	0.166952	0.342751	0.246467	0.314393
ENSG00000081277	PKP1	1.88373	0.130271	0.175522	1.25759	2.94455	1.10835	0.210757	0.167781	1.2248	2.1018	0.62016	0.147258	0.088154	0.590232	0.272564	0.240422	0.163291	0.215765	0.35873	0.558101
ENSG00000135333	EPHA7	0.954835	0.691124	0.693091	0.323615	0.64747	1.06408	0.723071	0.614187	0.802224	0.841918	0.341703	0.74823	0.439109	0.385515	0.315224	0.47139	0.768969	0.594723	0.244412	0.464083
NewGene_4128	NewGene_4128	0.732904	0.509669	0.422695	0.225018	0.310615	0.334753	0.293797	0.20259	0.429743	0.622647	0.256719	0.628971	0.424521	0.201502	0.411483	0.858041	0.915072	0.978626	0.616985	1.18091
ENSG00000147606	SLC26A7	0.109369	0.116511	0.129164	0.149574	0.189756	0.072981	0.143589	0.190434	0.054306	0.130768	0.188493	0.32399	0.794127	0.155123	0.650633	0.232063	0.530184	0.067159	0.532438	0.444931
NewGene_8107	NewGene_8107	5.13617	0.687829	0.746891	7.56522	2.255	4.51261	3.19348	4.19174	3.23175	7.96873	1.24333	0	0.855303	0.928214	0.883751	1.63836	1.39359	1.06107	1.62089	0.652413
ENSG00000105695	MAG	1.13034	0.581327	0.449117	0.218229	1.72055	1.31332	0.812657	0.181884	1.02742	1.18795	0.24315	0.537558	0.317768	0.471793	0.600171	0.125767	0.236882	0.45638	0.082983	0.326499
ENSG00000158887	MPZ	42.6241	25.5916	13.556	16.9337	85.0095	61.3346	40.6934	20.0308	64.2307	52.4161	16.784	23.2656	13.8857	25.7171	37.3518	10.1543	13.1125	22.1183	6.05836	20.7752
ENSG00000007908	SELE	0.165176	0.364534	0.486384	0.398165	0.614277	0.358685	0.329439	0.326639	0.570509	0.280826	0.16244	0.292774	0.555933	1.03753	0.866367	0.764142	1.34573	0.649804	0.494474	0.849521
NewGene_6421	NewGene_6421	1.49749	1.34879	0.890326	2.29346	1.96091	0.935012	0.780298	0.628733	0.631637	1.90559	2.27105	2.75834	0.918275	2.10369	1.40414	1.97979	0.989266	2.56385	2.41781	3.4009
NewGene_8471	NewGene_8471	2.10936	1.14272	0.56165	1.92627	1.47083	2.13114	2.16843	3.60767	2.42612	3.14262	4.01203	3.85128	1.219	2.69213	2.13763	2.97781	4.86916	2.37934	3.28795	2.60088
ENSG00000185304	RGPD2	0.096269	0.028421	0.052284	0.277725	0.377821	0.126878	0.128584	0.131622	0.133264	0.051019	0.193437	0.250605	0.152254	0.312666	0.082285	0.469151	0.348492	0.242343	0.158817	0.151146
ENSG00000049089	COL9A2	3.69374	4.47522	6.96145	7.54936	8.60622	2.76443	6.69359	5.96785	3.64691	3.74803	5.46335	5.9686	10.9626	11.5915	7.90044	10.789	6.07464	8.45572	5.45101	10.1736
NewGene_342	NewGene_342	3.57563	2.33211	1.61474	2.76081	3.11926	3.24256	0.921386	1.01452	3.457	3.30124	1.91332	2.3683	2.2351	1.45041	2.68389	1.56851	2.05818	1.12488	1.27006	1.43425
ENSG00000182986	ZNF320	1.06641	0.628691	0.879342	0.30335	1.04785	0.418761	0.337762	0.823763	0.340753	0.970463	0.649262	0.876972	1.0699	2.27693	0.594954	1.70884	0.54823	0.546029	2.1956	3.88705
ENSG00000106436	MYL10	16.3074	77.6231	101.467	33.4058	24.5074	54.5166	47.7424	56.5673	61.3123	19.9494	94.0567	44.3719	118.063	118.5	167.265	249.585	204.885	66.8574	173.617	122.594
ENSG00000213221	DNLZ	8.85337	12.1622	11.0509	13.6916	10.708	8.53028	7.65775	8.51692	9.34101	7.20103	23.6551	20.5692	11.4829	12.0973	22.2255	24.1745	12.0599	12.5978	13.7968	11.3578
ENSG00000106366	SERPINE1	2.14803	0.730484	0.958049	4.60207	7.36905	1.61655	1.54838	0.699732	1.28489	2.70246	0.668675	1.00573	1.38889	1.46543	2.67189	0.541438	1.49842	1.29137	0.477937	1.15506
ENSG00000165443	PHYHIPL	0.43946	0.214268	0.216883	0.860403	4.40134	2.29742	0.33674	0.384245	0.44998	0.343865	0.333138	0.197209	0.302835	0.366934	1.53856	0.243679	0.496991	0.285274	0.363391	0.356439
NewGene_4875	NewGene_4875	0.547931	1.65376	2.1108	1.22758	1.30874	0.453254	0.965282	1.59744	1.01701	0.484548	2.58753	3.57814	4.82935	4.03735	1.56658	6.39686	2.51132	5.05724	2.94068	4.20891
ENSG00000142449	FBN3	0.233619	0.144962	0.073136	0.133348	0.344965	0.107226	0.180668	0.122486	0.118211	0.240225	0.035942	0.084129	0.079468	0.095279	0.251216	0.028732	0.142591	0.056832	0.080354	0.224058
ENSG00000169245	CXCL10	1.14302	0.728512	4.49019	4.55139	8.01298	1.04855	0.992424	1.25504	2.46214	0.938812	0.859533	0.673173	1.0706	0.520027	1.45694	0.348154	0.688309	0.139498	0.209391	0.69748
ENSG00000173947	PIFO	1.96999	2.08117	2.46591	2.72817	2.77821	1.98776	3.41202	3.76715	2.25033	2.38375	1.01947	0.771061	1.37623	0.577066	2.25334	1.66496	1.35889	3.20871	2.82529	2.17317
ENSG00000163673	DCLK3	0.897396	0.491052	0.269001	0.439173	1.39368	1.11181	0.820222	0.445944	1.17928	0.953705	0.506366	0.649957	0.399073	0.726619	0.687433	0.506539	0.363842	0.696449	0.271923	0.548315
ENSG00000154920	EME1	0.112266	1.26988	2.24082	0.239882	0.448933	0.260831	0.578911	0.614509	0.18146	0.372986	0.322628	0.589801	2.0412	1.23806	0.755801	1.93106	0.657772	1.00045	1.18729	2.18433
NewGene_3518	NewGene_3518	0.277269	0.570294	0.422793	1.001	0.911435	0.848083	0.610232	1.02019	0.636579	0.219254	0.711482	0.286887	0.92061	1.79202	1.52582	1.63546	2.15624	0.817648	1.88121	2.21057
ENSG00000154027	AK5	0.976047	1.2079	1.2855	1.33117	2.30673	1.86576	2.53767	2.37813	2.25198	1.14748	1.15138	0.742502	1.25578	1.50717	1.45968	0.826078	0.573722	0.881771	0.714319	1.13717
ENSG00000271503	CCL5	2.3622	1.92307	4.23829	4.21379	2.77864	1.65767	0.794514	1.82569	1.94437	3.08929	1.43029	0.56759	0.653588	0.745524	0.779098	3.31892	1.64448	1.54652	1.2295	1.2507
ENSG00000164694	FNDC1	0.917624	1.142	2.51076	3.11784	2.23238	1.43386	0.542498	0.445515	1.29351	0.908356	0.213132	1.28591	2.16071	0.959167	3.67165	2.17925	8.31795	1.05215	3.00899	7.74285
NewGene_7790	NewGene_7790	3.1421	5.35962	4.63598	5.24206	7.16222	4.29324	3.61505	2.99851	4.50647	2.90517	1.79219	3.47068	2.51637	1.99013	3.89797	1.77188	8.3129	2.40981	1.50539	2.01995
ENSG00000160593	JAML	1.10128	1.22866	2.86264	3.5153	2.63941	0.901578	0.785352	1.33553	1.37541	0.748826	0.844362	0.20243	1.15454	0.606996	0.767899	1.83277	1.21598	1.20073	1.10567	0.958238
NewGene_5328	NewGene_5328	1.41688	3.6173	3.58049	2.86502	3.51334	1.33223	4.10389	3.75318	2.32677	1.78947	1.70221	2.40801	3.06597	2.10878	2.12091	3.99634	2.61544	2.46626	2.10529	2.86609
ENSG00000113100	CDH9	0.18422	0.503685	0.739954	0.269431	0.143148	0.089234	0.13758	0.02178	0.042335	0.250307	0.366123	0.480932	0.95204	0.243549	0.812003	1.2301	2.09734	1.10123	0.665699	1.64223
ENSG00000124019	FAM124B	0.925803	0.820194	0.633437	0.639303	0.49981	0.784731	0.274331	0.431336	0.727647	0.957788	0.413569	0.749139	0.85798	0.375767	1.13518	1.06377	1.88617	2.25558	1.0817	1.3977
ENSG00000160862	AZGP1	0.860792	2.01002	1.58536	0.753704	3.09182	2.25585	1.98121	1.04682	2.33763	1.95559	0.670317	0.969132	1.08475	1.09929	1.57201	0.886816	0.877091	0.773975	0.966832	1.17168
NewGene_11343	NewGene_11343	1.92959	2.7651	3.60324	4.4713	3.42588	2.07486	1.64401	1.91813	1.48511	2.057	3.86987	1.94884	3.50423	3.19233	2.37342	3.29579	3.8247	4.26835	7.10343	6.27313
NewGene_6738	NewGene_6738	1.17137	0.7873	1.06559	0.584781	1.50358	1.76653	1.17031	1.29365	1.2516	1.23787	1.72785	0.231141	0.159173	0.09394	0.851286	0.721331	1.00885	0.304453	0.079285	0.265975
ENSG00000262655	SPON1	0.582516	0.481577	0.7421	0.681158	0.698668	0.453201	0.305795	0.523531	0.258538	0.543188	0.501475	0.856664	0.766778	0.614344	1.15833	0.777726	1.5889	0.281421	0.651811	1.22607
ENSG00000147255	IGSF1	0.984343	2.02687	4.59747	1.59604	3.78087	1.24216	1.38031	1.01059	1.48304	1.1561	0.313609	2.14832	4.02897	1.40803	3.87423	3.21866	9.0562	1.66822	1.91001	5.24922
ENSG00000153234	NR4A2	1.38993	1.13006	0.834115	1.45921	2.55117	1.09197	1.10242	0.844138	1.14219	1.16949	0.614585	0.677881	0.633207	0.979044	1.0951	0.608285	0.8995	0.776515	0.530649	0.805675
ENSG00000161649	CD300LG	13.0133	2.27274	3.42613	3.86793	7.82723	9.87526	7.62458	5.34031	11.1296	12.7019	6.31714	7.77876	2.84117	4.88782	3.979	5.44776	3.85863	7.50442	2.81717	4.21282
ENSG00000138829	FBN2	0.092546	0.105563	0.222052	0.215876	0.196552	0.113242	0.077567	0.102273	0.077109	0.099698	0.041143	0.148548	0.160247	0.101054	0.197674	0.172974	0.357924	0.150449	0.282675	0.63918
ENSG00000101298	SNPH	4.32146	2.69818	2.67404	2.91701	3.49953	2.91064	3.71945	3.41441	2.69134	3.9274	2.39861	2.72172	0.959921	2.27433	2.97252	2.39388	2.03256	1.42578	1.78519	2.79251
ENSG00000164796	CSMD3	0.327038	0.640649	0.507648	0.074979	0.118341	0.119549	0.032614	0.022248	0.13775	0.30886	1.00579	0.060655	0.132173	0.621203	0.274947	0.532094	0.476247	0.855952	0.572998	0.572649
ENSG00000130037	KCNA5	3.90427	1.70029	1.55621	2.38823	4.88558	4.76861	3.33229	1.87554	4.38466	5.66131	1.58761	3.25001	2.19936	3.46958	2.04278	1.51229	1.53899	2.41289	1.1396	3.03095
ENSG00000130035	GALNT8	1.7645	2.22995	2.54039	2.66612	2.31312	2.23047	2.18076	1.47292	1.85847	1.42529	2.07709	1.4895	1.46437	2.75962	1.95962	1.5675	1.71553	2.41214	1.39106	1.57841
ENSG00000133433	GSTT2B	3.26566	2.56243	3.89834	12.494	11.9491	3.438	16.1186	14.3247	2.76935	4.27887	3.73144	22.2514	13.3877	16.979	13.1484	18.4683	16.6359	12.5677	12.5907	15.0846
ENSG00000151575	TEX9	0.379848	0.777955	0.906142	0.75028	0.556145	0.632588	0.311438	0.098675	0.513056	0.464033	0.480492	0.370323	1.17372	0.381464	0.675069	0.436658	0.580667	1.01501	1.10368	2.97698
ENSG00000118777	ABCG2	0.528922	1.43673	1.0556	1.51712	1.39216	0.782577	1.07318	1.03141	0.834226	0.772697	0.583998	0.522244	1.82557	1.29916	1.87382	2.47702	2.60417	1.28831	1.61921	3.38712
NewGene_11966	NewGene_11966	0.497605	0.36757	0.45821	0.848616	0.822688	0.81841	0.61914	0.379977	0.73494	0.392229	1.13491	1.53729	0.594866	0.855324	0.561373	1.01825	1.02512	1.4951	1.25802	1.32022
ENSG00000277758	FO681492.1	0.750204	0.44934	0.631825	0.315784	0.5921	0.783324	0.568979	0.23793	0.670881	0.673924	0.550646	0.591898	1.2153	0.452068	1.35975	0.964864	1.12555	1.14987	0.650412	1.1968
NewGene_7108	NewGene_7108	1.67831	1.90878	1.42109	0.373493	0.523442	2.10776	2.54845	2.29397	1.98293	1.50182	2.13525	1.02929	0.705727	0.710936	0.83928	1.05707	0.857663	1.1928	1.15739	1.13325
ENSG00000270011	ZNF559-ZNF177	1.2347	1.25588	1.2396	1.25574	1.47158	1.38501	0.707109	0.58494	0.677693	1.63495	1.78976	1.74283	1.91844	1.54521	2.38565	1.65894	2.49188	1.67241	2.01872	2.2963
ENSG00000175832	ETV4	1.03613	1.91306	2.50403	1.77082	1.60367	1.01683	1.15556	1.52531	1.04997	0.953617	1.20242	1.2592	2.13199	1.45808	4.34927	1.43864	4.1309	2.32686	2.89957	4.08216
ENSG00000125869	LAMP5	0.231791	1.71387	1.70436	0.877939	1.00242	0.794659	0.228017	0.394292	0.440242	0.470812	0.124207	1.31972	1.4754	0.734965	3.31437	1.46681	5.29547	1.1964	2.35203	3.70227
ENSG00000197471	SPN	0.508214	0.153597	0.523833	0.308623	0.752893	0.381987	0.084347	0.213489	0.187278	0.797718	0.072922	0.065703	0.068364	0.115835	0.071968	0.184265	0.198573	0.193393	0.311625	0.14419
ENSG00000204248	COL11A2	1.148	1.0539	2.05059	1.69288	1.55613	0.718677	1.15449	0.702263	0.595863	1.35077	0.625756	0.923249	3.33613	0.751329	4.51243	2.10603	6.79181	0.819738	3.22507	3.44468
NewGene_2474	NewGene_2474	1.05676	1.38773	1.98394	2.94326	1.38154	0.85629	0.797707	0.863236	0.544283	1.56776	0.359447	0.430817	1.39194	0.61561	1.36161	1.49237	1.37222	0.458916	1.60225	0.744339
NewGene_2292	NewGene_2292	0.446039	0.364989	0.787458	0.814534	0.728791	0.171531	0.306771	0.180068	0.173111	0.332211	0.791079	0.756911	0.64027	0.714913	0.731247	0.517383	0.605275	0.820924	0.556754	1.06624
ENSG00000135902	CHRND	6.34907	9.29622	11.6279	5.7678	7.58094	7.33553	10.4677	7.80553	7.28181	6.23655	5.38728	7.04085	14.4271	12.4183	17.2045	19.6317	12.7863	9.38778	12.5828	22.6931
NewGene_11802	NewGene_11802	0.856277	1.07526	1.22938	0.382436	0.17384	0.639356	0.510172	0.662223	0.252468	0.742171	0.751718	0.408948	0.511029	0.198812	0.235497	0.736979	0.463646	0.183988	0.21994	0.382368
NewGene_11800	NewGene_11800	2.13985	2.0156	1.95296	2.04896	1.75368	0.517028	0.57104	0.713437	0.490397	1.25154	3.41607	2.18792	3.2314	2.05233	2.44101	2.11314	1.84245	1.73989	3.05333	1.76472
NewGene_10818	NewGene_10818	0.551334	0.313151	0.211916	0.405837	0.412369	0.383577	0.212139	0.288511	0.262564	0.444039	0.395906	0.439732	0.922772	0.427602	0.581249	0.314864	0.195504	1.15136	0.403969	0.657217
ENSG00000176204	LRRTM4	0.581706	0.53479	0.533797	0.90167	1.15808	0.682588	1.12054	1.07954	0.920503	0.715053	0.608018	0.290647	0.568749	0.32477	0.349968	0.779011	0.662951	0.1896	0.802686	0.406339
ENSG00000165186	PTCHD1	0.175937	0.080616	0.104492	0.410201	0.526407	0.068051	0.237092	0.260052	0.077661	0.094746	0.246389	0.119347	0.108613	0.093354	0.113849	0.096938	0.103778	0.073177	0.053029	0.100598
ENSG00000204936	CD177	0.137791	2.04309	1.28355	0.854878	1.84993	0.76542	0.833894	0.670353	0.96812	0.111183	0.415698	0.118236	0.363622	0	0.34578	0.49493	0.591941	0.284909	0.506179	0.619338
ENSG00000172179	PRL	2.26017	3.09139	1.8149	1.33495	1.34249	2.48148	0.440713	0.277706	1.87723	2.05952	3.04142	2.77933	5.97285	1.24319	7.12509	2.40752	4.38148	1.98217	3.48527	3.28645
ENSG00000236279	CLEC2L	3.30072	1.25969	1.97844	3.47068	3.81097	2.91674	4.9594	5.39312	2.51085	3.56267	2.29359	3.81708	2.22198	2.24389	1.99802	1.30855	0.949817	2.21189	1.63769	1.52287
ENSG00000183036	PCP4	1.33013	1.81666	2.25646	1.84922	2.09805	1.87423	1.45098	1.09532	1.21075	1.91837	1.93386	3.42428	2.99813	3.45852	1.86223	2.27936	3.90931	2.49734	3.52467	2.57478
ENSG00000184261	KCNK12	0.511864	0.245992	0.26966	0.209875	0.713125	0.879064	0.369045	0.200928	0.726264	0.50166	0.111056	0.320071	0.214228	0.17061	0.350563	0.128185	0.105799	0.224585	0.015752	0.189565
ENSG00000136457	CHAD	0.523415	1.27832	2.48637	1.86858	0.582183	0.664931	0.391014	0.140431	0.534318	0.404566	0.250507	0.985514	2.13263	0.597361	3.20886	2.80401	12.1176	0.566142	2.69209	4.25569
ENSG00000105227	PRX	5.343	4.50376	3.73322	3.43765	11.7266	5.95493	5.97794	3.62054	6.1933	6.94116	2.61529	3.23868	2.32008	2.93867	6.73729	1.94862	2.45339	3.27215	2.33602	5.29806
NewGene_2755	NewGene_2755	1.1277	0.170836	0.135801	0.692918	0.843514	0.609377	0.44683	0.430467	0.482478	1.06183	0.222867	0.223783	0.198984	0.203155	0.930071	0.443434	0.381464	0.314136	0.356275	0.680803
NewGene_9932	NewGene_9932	0	0.471629	0.706003	0.443442	0.316342	0.116046	0.114204	0.229798	0.170901	0.200953	0.240283	0.18669	0.361647	0.227197	1.04773	0.482512	1.22121	0.248837	0.694335	1.37562
NewGene_5234	NewGene_5234	0.251405	0.836387	1.1076	1.31616	0.893469	0.307779	0.16191	0.155608	0.669588	0.16139	0.67593	0.731165	0.834325	0.481747	0.506217	0.925366	1.87377	0.583575	2.01847	2.03673
NewGene_2484	NewGene_2484	2.20791	0.876656	1.07167	1.14695	1.19464	1.38362	1.3786	1.32271	1.05148	1.78705	0.778531	1.14606	0.934905	0.545973	0.364161	1.12767	0.950407	0.273419	0.586024	0.757209
ENSG00000162989	KCNJ3	0.242928	0.449464	0.670713	0.148714	0.302442	0.20403	0.244838	0.293709	0.238204	0.22221	0.186777	0.486152	1.04854	0.50502	1.11667	0.860253	0.732729	0.486255	0.717607	1.71287
ENSG00000125851	PCSK2	0.243111	0.527452	0.486035	0.179735	0.240008	0.502189	0.578305	0.248756	0.395559	0.258276	0.193575	1.10217	0.556469	0.554336	0.979966	0.584634	0.63368	0.740969	0.2642	0.387692
ENSG00000064787	BCAS1	1.03531	0.891084	0.252917	0.818175	0.503602	1.56099	0.292653	0.146988	1.4906	0.854163	0.658331	0.543378	0.385172	0.843795	0.957253	0.077963	0.133189	0.371091	0.302152	0.775941
ENSG00000162494	LRRC38	25.0549	12.4018	10.6115	6.19035	10.5334	20.5914	19.5023	17.8689	18.8523	22.7345	15.7868	16.8358	15.5965	9.31022	6.81912	13.5946	5.30916	6.82829	6.22607	7.04857
ENSG00000121807	CCR2	0.468219	0.543672	0.578216	1.20991	1.51793	0.411739	0.330253	0.222906	0.52336	0.574798	0.184981	0.130713	0.217188	0.138763	0.362836	0.726085	0.347472	0.236511	0.447958	0.783037
ENSG00000164161	HHIP	0.554047	1.73513	1.83517	1.18952	0.836554	0.822185	0.85109	0.592265	0.829768	0.45123	0.469902	0.790624	1.92778	0.685848	1.86042	1.65861	5.24316	1.05187	3.09901	3.95377
ENSG00000174175	SELP	1.29532	2.01301	1.49275	1.41793	2.04143	2.34927	1.25235	1.16736	1.88151	1.57803	1.25046	1.87897	2.0575	1.79314	2.77625	2.10074	3.17452	3.78279	2.35831	5.36041
NewGene_5179	NewGene_5179	8.02532	8.85614	12.064	11.1943	10.1168	7.95668	10.3611	11.0896	7.70547	8.06827	9.97527	6.71842	21.5655	13.4583	14.8639	13.7498	17.914	13.4558	15.9196	19.7394
ENSG00000108342	CSF3	0.52343	0.421155	0.897	0.549412	0.481098	0.431975	0.402544	0.123796	0.417992	0.175506	0.823382	0.770683	1.27938	0.705961	1.51113	0.735467	0.30109	0.819854	1.10954	0.830719
NewGene_7882	NewGene_7882	0.792659	2.94433	2.47228	1.05327	2.34717	0.937807	2.07477	2.18312	0.958588	0.727882	1.66193	2.24316	3.56882	2.191	3.03004	2.61463	1.6089	2.8037	2.23808	4.10033
ENSG00000197977	ELOVL2	1.74722	1.63889	1.35277	2.6759	3.49324	2.23702	2.86852	3.1864	1.96385	1.97855	2.58242	1.3958	1.72899	1.15193	2.1429	1.38946	0.852349	1.2188	1.38946	1.46573
ENSG00000197971	MBP	34.0151	27.1649	20.2307	21.3429	54.8727	43.0712	33.9585	15.9942	41.1672	37.6665	18.0841	22.5437	16.0557	21.191	33.7302	14.7262	16.0819	19.3478	11.5153	19.5445
ENSG00000081051	AFP	0.341827	1.32387	0.822092	0.308824	0.37447	0.386782	0.117599	0.088337	0.296132	0.3065	0.402683	0.111974	0.849952	0.539167	0.977928	3.85071	2.99483	0.266249	2.26726	1.78071
ENSG00000206172	HBA1	23.7007	200.174	2691.76	545.414	70.8222	80.8569	100.29	207.624	38.1363	42.5201	49.1991	76.8126	94.6786	42.3643	76.2395	395.335	128.861	36.7334	204.939	62.4261
ENSG00000007171	NOS2	0.913638	0.225004	0.128348	0.642193	1.44496	0.49813	0.884281	0.648913	0.505698	0.789577	0.541467	0.352609	0.106426	0.719804	0.379038	0.163168	0.16077	0.327016	0.133208	0.231247
ENSG00000135697	BCO1	1.05684	0.757698	0.566114	0.409738	0.896697	0.718703	0.935236	1.06559	0.744028	0.799648	0.570913	0.618651	0.751168	0.625581	0.557001	0.891897	0.30328	0.304629	0.208215	0.326726
NewGene_10103	NewGene_10103	1.35888	0.378958	0.629868	1.73981	2.10524	0.803362	1.86489	1.92244	1.46981	0.910283	2.17013	2.99161	3.08016	2.42974	2.28878	1.1994	0.832877	4.37069	1.23644	3.02383
ENSG00000143768	LEFTY2	0.708975	0.593558	1.41667	0.822355	0.827152	0.525672	0.266633	0.412108	0.596898	0.832188	0.284973	0.829821	1.37286	0.417863	1.3192	0.727116	3.24536	0.867551	0.739825	2.22053
ENSG00000116661	FBXO2	1.14385	2.30991	2.74418	2.47958	1.16372	0.911781	1.79045	1.63593	0.833629	0.875394	3.28052	1.70965	4.69639	1.1371	2.46381	4.47359	3.13268	0.980857	1.9631	2.87133
ENSG00000168621	GDNF	0.326176	0.168165	0.254239	0.212423	0.155545	0.124564	0.544766	0.414963	0.089911	0.103748	0.222797	0.186243	0.667542	0.691809	0.559354	0.487308	0.453145	0.180735	0.570114	0.825801
ENSG00000147588	PMP2	1.52186	1.34971	0.78469	1.06004	3.74624	2.20588	1.77271	0.859405	1.87376	1.88628	1.14273	0.821282	0.886569	0.761424	1.36013	0.557408	1.16707	0.964899	0.729165	1.18478
ENSG00000164099	PRSS12	0.651445	0.712286	1.57182	2.10043	1.19701	0.713801	0.661866	0.937142	0.730911	0.622889	0.711086	0.949993	1.57421	1.13991	2.76927	1.68998	1.45073	0.872388	2.17347	2.28206
ENSG00000013588	GPRC5A	0.806695	1.92842	2.69627	1.2494	1.40509	0.957662	2.64971	2.52241	0.985646	0.856916	1.71336	1.16051	1.81902	4.03296	1.94472	3.58391	1.11378	2.57037	2.85303	3.70739
ENSG00000197181	PIWIL2	0.460087	0.184466	0.203102	1.31083	1.84164	0.90596	0.793061	0.355962	0.879219	0.462726	0.32903	0.082273	0.15722	0.368857	0.752423	0.343891	0.72129	0.107603	0.489583	0.690187
ENSG00000123901	GPR83	0.160092	0.277067	0.442326	0.320411	0.260388	0.268699	0.255454	0.323517	0.471464	0.223451	0.070493	0.177333	0.614604	0.371118	0.721199	0.493169	0.571653	0.407863	1.00148	0.750628
ENSG00000173166	RAPH1	0.351966	0.236404	0.252559	0.173242	0.755202	0.225186	0.320968	0.253755	0.159339	0.496184	0.119541	0.198623	0.138057	0.018904	0.204939	0.335488	0.117822	0.340969	0.112189	0.455736
ENSG00000176890	TYMS	0.578145	1.24132	0.806758	0.419286	0.650814	0.381032	0.245207	0.229999	0.408744	0.679238	0.903698	0.496185	1.72692	0.649498	1.30372	0.882856	1.55738	1.36458	1.10143	1.3573
ENSG00000186417	GLDN	1.18598	0.608851	0.61925	0.649699	1.98127	1.29675	1.01054	0.669527	1.35293	1.3621	0.697524	0.67973	0.565195	0.801901	1.14848	0.651562	0.741545	0.828658	0.300096	0.778757
ENSG00000172404	DNAJB7	0.366818	0.307597	0.273795	0.38761	0.43188	0.376706	0.22561	0.145501	0.119067	0.116226	0.450709	0.183818	0.668005	0.575983	0.301562	0.493802	0.498104	0.793657	0.227352	0.332132
ENSG00000154864	PIEZO2	0.187486	0.695943	0.940486	1.39722	0.897671	0.399429	0.2669	0.195783	0.410483	0.247345	0.134152	0.374029	1.32322	0.244392	2.41523	1.34164	3.00627	0.301061	1.79123	2.83586
NewGene_4741	NewGene_4741	0.203801	0.407005	0.290459	0.309293	0.340615	0.226092	0.346872	0.228935	0.264765	0.164416	0.413455	0.308027	0.607491	0.454817	0.428972	0.327789	0.919101	0.255933	0.280589	0.899496
ENSG00000133020	MYH8	0.584522	0.464575	0.502611	1.82031	1.25179	0.27051	0.280633	0.300416	0.296653	1.01113	0.519738	1.26405	0.428798	2.03045	0.859026	0.690456	1.47098	0.461742	1.1602	4.02965
ENSG00000284874	AC000093.1	2.46095	11.4923	13.7403	8.65489	9.64095	7.77911	5.61677	7.86482	2.9694	3.54002	7.73582	11.9174	19.6196	10.3873	8.54016	8.48336	19.8945	6.75447	14.1409	17.6475
ENSG00000123689	G0S2	13.9293	35.0522	33.5776	38.3173	27.4432	33.9948	32.971	52.5923	26.7945	14.9267	29.7754	14.9836	31.9527	15.214	26.1954	25.884	15.6036	11.5489	20.2595	10.2867
NewGene_7424	NewGene_7424	0.561483	0.868479	1.63519	1.87586	1.35395	0.425105	0.161682	0.441413	0.190887	0.150177	0.142753	0.929456	2.41236	1.18359	1.56066	1.08057	2.35177	1.15078	0.706238	1.29578
ENSG00000260428	SCX	1.90596	4.88789	4.59157	6.71109	2.22334	2.04486	1.15588	0.988947	1.90101	1.68011	1.12261	2.73312	6.41767	4.26471	8.12988	7.15052	10.8664	2.92482	7.0054	6.71804
ENSG00000164879	CA3	31.0277	51.6092	75.0789	56.4793	20.7797	25.6312	4.4935	8.27585	12.8422	46.5602	27.1377	158.096	95.241	85.7165	102.309	94.6825	273.746	96.4181	212.838	229.149
ENSG00000107147	KCNT1	0.500408	0.753096	0.415405	0.746344	0.881236	0.387714	0.912821	0.549726	0.789408	0.680391	0.582415	0.326405	0.601525	0.207426	0.392953	0.311393	0.334562	0.264449	0.325035	0.584063
ENSG00000187957	DNER	1.73803	4.41907	5.03866	3.72841	6.78632	4.41813	4.7731	3.62164	4.71122	1.99865	1.88312	0.318556	0.643273	0.294397	1.44712	1.99893	2.87881	0.181745	0.627634	1.04444
NewGene_11128	NewGene_11128	0.282396	0.545014	0.435192	0.766413	0.829652	0.231917	0.156435	0.312452	0.08554	0.256899	0.212277	0.176472	0.533889	0.753455	0.366175	2.31788	0.697492	0.199902	0.770781	1.10145
NewGene_3207	NewGene_3207	0.200883	0.727434	0.544402	0.426113	0.644307	0.245188	0.443329	0.51241	0.115854	0.141794	0.735222	0.404546	0.750567	0.793175	0.551928	0.992876	0.943613	0.710393	0.545701	0.854648
ENSG00000139330	KERA	0.122891	2.51831	4.15288	7.73649	1.12837	1.28075	0.227329	0.185684	0.315937	0.132259	0.364255	1.67034	4.206	0.708803	16.0514	15.6819	29.2261	1.58939	19.1473	23.5189
ENSG00000182162	P2RY8	2.16379	0.500086	1.17332	1.1125	3.01158	1.89594	3.46351	1.9996	2.33176	3.02925	1.24905	1.53367	1.12005	1.83142	1.67525	0.875037	0.686963	0.967858	0.442014	0.798873
ENSG00000123496	IL13RA2	0.863793	0.864066	0.88929	1.40447	1.56455	0.768571	2.88556	1.94602	0.75618	0.582282	3.55064	0.540209	5.54289	4.22249	5.04821	1.07623	0.41253	1.1894	1.29449	1.18303
ENSG00000179598	PLD6	2.33939	5.73603	5.84898	4.31572	6.39887	3.56534	3.67844	3.07728	3.83411	2.55948	3.80855	5.49558	6.9331	6.10964	5.00781	6.23032	3.93373	8.65989	7.19663	10.7871
ENSG00000272414	FAM47E-STBD1	1.25585	3.19067	1.97057	1.42844	1.27424	1.72707	43.6216	1.81857	0.402802	1.69573	1.35187	0.903936	0.965045	0.275867	1.57684	1.24581	0.515274	1.96547	0.727527	0.42697
ENSG00000139410	SDSL	1.33741	0.819938	0.582767	1.8879	1.72401	1.15763	2.96844	4.25765	1.2648	1.11531	0.581464	0.448567	1.87388	0.602991	0.714782	1.05369	0.93771	0.499948	1.08757	1.95715
ENSG00000066827	ZFAT	1.03568	0.769774	1.36186	0.811306	1.05052	0.671594	0.783886	0.883592	0.829343	0.829504	0.492792	1.1054	0.866595	0.709702	0.930799	0.903407	11.6545	0.962775	0.814794	1.36689
ENSG00000283900	TPTEP2-CSNK1E	0.853129	0.90956	0.607171	1.02763	0.601167	0.551484	0.648532	0.791956	0.663319	0.631795	0.550726	1.86851	0.90324	0.560268	0.608519	1.73142	0.970152	0.753339	0.995549	3.76848
NewGene_10727	NewGene_10727	0.293782	0.07951	0.187586	0.38295	0.51346	0.117758	0.395075	0.458918	0.421547	0.075028	0.255171	0.743503	0.888208	0.630304	0.632316	0.630216	0.396057	0.705488	1.10637	0.618334
ENSG00000236782	AL391650.1	1.6905	1.63108	1.39713	1.91381	1.62288	2.01962	1.85624	2.53438	1.21257	2.35582	1.83488	3.75623	2.98491	2.93495	2.69864	3.15302	3.58223	2.56	3.0668	4.44656
ENSG00000156475	PPP2R2B	0.058916	0.108123	0.072928	0.212446	0.142348	0.147367	0.379804	0.065079	0.373035	0.091837	0.134798	0.122062	0.322506	0.074209	0.383354	0.196172	0.409008	0.075533	0.213147	0.586007
ENSG00000166960	CCDC178	1.41893	1.63878	1.30154	1.71292	1.32009	0.255967	1.02283	1.3601	0.803435	2.13449	4.18985	1.87407	2.44523	2.09276	5.08231	5.06964	6.11232	2.83747	7.05561	3.15496
ENSG00000128683	GAD1	0.287376	0.135073	0.386354	0.262555	0.294246	0.221365	0.463211	0.492389	0.167231	0.178468	0.358397	0.216278	0.520958	1.20869	0.354399	0.450638	0.718569	0.401662	0.217875	0.488701
NewGene_1869	NewGene_1869	0.355596	0.236693	0.267218	0.462587	0.326224	0.096789	0.177254	0.1787	0.083116	0.143588	0.434474	0.253589	0.837574	0.695897	0.256259	0.41938	0.259982	0.343205	0.364756	0.532713
ENSG00000136867	SLC31A2	2.12253	1.36471	1.62207	1.4683	1.72965	0.970772	1.29923	3.25127	0.768542	1.1136	0.935352	1.1889	1.36395	0.747626	1.18023	0.857363	0.694923	0.460594	1.08262	1.40017
ENSG00000249992	TMEM158	0.649041	1.12627	1.45698	2.20475	1.7699	1.51345	1.74674	1.1791	0.730274	1.2681	1.21817	1.27563	3.13918	2.67025	2.16238	2.48522	5.80286	1.19806	1.88977	2.04547
ENSG00000214050	FBXO16	1.67809	1.81558	1.6353	0.740971	1.61362	1.92603	1.99533	1.44084	1.18612	1.71795	0.588766	1.16675	1.45365	0.783178	1.60727	0.892746	0.952837	0.465837	1.04783	0.926822
ENSG00000151715	TMEM45B	0.449209	0.420369	0.35314	0.267622	0.214329	0.218634	0.416326	0.159892	0.434831	0.198158	0.467018	0.5516	1.04755	0.351371	0.536915	0.350125	0.502135	0.466034	0.767257	1.21291
ENSG00000188522	FAM83G	0.164359	0.106997	0.163974	0.22171	0.207957	0.108765	0.253377	0.19766	0.139725	0.222628	0.244265	0.159721	0.342184	0.469206	0.226924	0.260528	0.274494	0.522588	0.212912	0.464912
ENSG00000133794	ARNTL	0.858499	1.41651	1.60665	1.11846	0.616365	0.925902	0.738835	0.615632	0.700497	0.844838	0.703336	0.562229	0.701811	0.838447	1.08361	0.564496	1.82553	2.42853	3.88235	4.01302
ENSG00000066248	NGEF	0.067297	0.615436	0.539391	0.447375	0.350552	0.054838	0.147231	0.154983	0.17859	0.200118	0.186693	0.11461	0.544545	0.311215	0.615883	0.541673	0.728039	0.254352	0.721006	0.962353
ENSG00000203727	SAMD5	0.162792	0.211599	0.127258	0.356025	0.189568	0.177592	0.190295	0.26924	0.169874	0.144281	0.127047	0.199301	0.393239	0.131646	0.263807	0.342418	0.412602	0.406777	0.332932	0.794343
ENSG00000231274	SBK3	1.78182	1.6242	1.30596	1.29717	2.85828	1.43679	3.20077	3.47662	1.19515	1.84222	1.81643	0.779907	1.29985	1.09534	2.35605	1.84888	0.713105	0.665338	0.718214	1.46157
NewGene_2178	NewGene_2178	1.74906	1.48855	1.92672	1.38838	1.4611	1.4201	1.83898	2.34786	1.59529	2.95506	1.85911	0.483998	2.34326	1.89243	0.676097	1.03817	0.724712	1.06365	0.508471	0.353588
ENSG00000100292	HMOX1	23.5183	19.1173	16.7659	17.3547	17.3777	19.5438	33.3957	24.4913	19.8246	28.1994	15.695	15.1796	20.1091	11.6226	14.3539	9.88339	13.3521	9.9807	12.9562	8.89328
NewGene_3100	NewGene_3100	1.16838	0.3029	0.518951	0.403508	0.429536	0.198666	0.595523	0.581128	0.181407	0.707545	0.837564	1.09122	0.403035	0.469971	1.07858	1.84704	0.823761	0.569743	0.671611	1.1819
ENSG00000124507	PACSIN1	2.17741	2.0095	1.90657	1.59578	2.10906	3.99115	3.97371	4.0945	3.92175	1.99324	1.82358	3.38418	1.5227	1.75723	2.05043	1.12301	1.91015	0.961863	1.60479	2.99315
NewGene_11523	NewGene_11523	0.981599	1.63778	2.14483	4.36179	2.16495	0.918849	0.187496	0.534183	0.827393	2.47335	1.52657	3.04642	2.89992	2.72416	5.05635	5.6174	6.3697	1.33743	5.29699	2.58786
ENSG00000088756	ARHGAP28	2.95939	1.90049	1.70797	2.40117	3.41616	2.60157	2.31838	1.75382	2.43471	1.04402	0.599956	2.8972	0.668571	0.405562	0.649215	1.06902	2.70518	2.311	0.468709	0.897366
NewGene_5155	NewGene_5155	3.44019	8.80111	7.77854	12.1761	9.59548	4.26332	3.42536	3.54847	3.70974	4.38095	5.98205	4.01567	8.09075	3.71136	9.9254	16.3886	21.9624	4.92075	11.7862	12.0883
ENSG00000170345	FOS	3.39391	7.386	6.16554	16.4903	15.2008	6.47604	9.16758	13.7779	6.85983	3.73317	2.64588	3.52643	3.90441	5.84654	4.83017	5.27218	7.63208	3.58538	6.58949	8.55974
ENSG00000070526	ST6GALNAC1	0.345302	1.1541	1.4864	0.719624	0.598319	0.955666	0.95866	0.44447	0.884421	0.656202	0.229541	1.36919	1.20612	0.514315	1.00158	1.87812	2.51096	1.30901	1.01483	2.72268
