# Supplementary material for: Gene expression profiling of extraocular muscles in primary inferior oblique overaction
Source: PeerJ journal article supplement (doi:10.7717/peerj.19474), 2025-05-28
Supplement: DataTable1.xlsx [file DataTable1.xlsx]

## Sheet: Sheet1
Primary	AGE	Gender	Eye	IOOA		Secondary	AGE	Gender	Eye	IOOA
	2	F	OD	2			2	F	OD	3
	2	F	OS	2			7	M	OD	3
	9	F	OD	2			2	M	OD	2
	8	F	OS	3			4	M	OS	2
	3	M	OD	3			8	M	OD	3
	4	M	OD	3			6	F	OS	3
	4	M	OS	2			4	F	OS	4
	3	M	OS	3			4	F	OS	3
	3	M	OD	3			4	F	OD	2
	6	F	OD	3			1	F	OS	2
