# Supplementary material for: Gene expression profiling of extraocular muscles in primary inferior oblique overaction
Source: PeerJ journal article supplement (doi:10.7717/peerj.19474), 2025-05-28
Supplement: Raw_Data.docx [file Raw_Data.docx]

**Data Availability**

The raw data supporting the conclusions of this study are available in the NCBI GEO database under accession number GSE281104, accessible via the following link: <https://www.ncbi.nlm.nih.gov/geo/query/acc.cgi?acc=GSE281104>.
