# Supplementary material for: Gene expression profiling of extraocular muscles in primary inferior oblique overaction
Source: PeerJ journal article supplement (doi:10.7717/peerj.19474), 2025-05-28
Supplement: Seqence1.xls [file Seqence1.xls]

## Sheet: Table S1 Differential analysis 
#ID	Symbol	P-17_Count	P-16_Count	P-10_Count	P-9_Count	P-3_Count	P-2_Count	P-22_Count	P-21_Count	P-19_Count	P-18_Count	S-13_Count	S-12_Count	S-11_Count	S-7_Count	S-6_Count	S-8_Count	S-1_Count	S-15_Count	S-14_Count	S-20_Count	P-17_FPKM	P-16_FPKM	P-10_FPKM	P-9_FPKM	P-3_FPKM	P-2_FPKM	P-22_FPKM	P-21_FPKM	P-19_FPKM	P-18_FPKM	S-13_FPKM	S-12_FPKM	S-11_FPKM	S-7_FPKM	S-6_FPKM	S-8_FPKM	S-1_FPKM	S-15_FPKM	S-14_FPKM	S-20_FPKM	Pvalue	log2FC
ENSG00000110514	MADD	1743	1546	2448	1955	1555	1446	2083	2682	1903	1806	1781	1745	1611	1438	1648	2228	1110	1546	1826	2161	7.98632	7.1064	10.0431	8.51305	6.50965	6.44006	8.35572	9.90071	9.22877	6.36657	6.96988	8.0326	7.78272	6.4658	6.9739	11.3423	6.13661	7.77933	9.56458	8.63078	0.286343	-0.103002
ENSG00000086015	MAST2	4328	3485	6284	5461	3607	3230	3725	5377	4183	4104	3943	3625	4077	3422	4193	5796	2690	4175	4420	4178	19.6637	15.9617	25.3174	24.5204	15.624	14.9039	15.1568	20.1303	19.9185	14.6349	15.963	17.1834	20.2423	15.6251	17.4814	28.8444	14.0765	18.7248	20.8052	17.1679	0.684723	-0.0474492
ENSG00000261609	GAN	724	800	1168	832	751	893	793	1021	959	805	1101	969	726	585	747	726	576	714	791	739	1.20392	1.34455	1.72148	1.36592	1.17389	1.51934	1.18558	1.37994	1.67792	1.04794	1.63724	1.66048	1.31019	0.98622	1.14954	1.31189	1.09508	1.15998	1.36155	1.11322	0.337523	-0.118308
ENSG00000168297	PXK	817	718	706	705	688	636	704	817	812	1027	437	657	531	874	618	721	435	823	629	950	9.90216	7.6998	6.80486	7.80358	5.742	6.6157	6.98805	7.66777	8.65213	7.712	4.46348	6.52856	7.23469	8.48961	7.21275	8.91631	6.01451	9.989	7.85943	11.2244	0.152864	-0.132095
ENSG00000168291	PDHB	5778	6649	7781	6330	6263	6428	7038	8192	5651	6463	7282	6717	6346	5249	6992	4592	5543	5855	5911	6931	96.0603	111.583	114.505	103.537	96.3094	107.405	103.526	110.538	98.1266	83.7592	108.324	115.156	111.915	88.3195	105.658	81.4228	105.315	93.7525	99.389	102.964	0.732782	-0.0380952
ENSG00000149792	MRPL49	1379	1439	1479	1148	1280	1175	1317	1496	1283	1756	1410	1172	1153	1441	1271	1238	973	1221	1421	1555	17.3314	18.2131	16.6903	14.2332	15.2261	15.0805	14.8574	15.2921	16.8562	17.4316	15.8355	15.2375	15.7061	18.3484	14.8351	16.6162	13.9973	15.0799	18.6908	17.7048	0.63795	-0.0254704
ENSG00000149798	CDC42EP2	628	463	292	258	268	279	425	342	368	937	385	402	278	572	281	407	369	4	506	384	7.86735	5.87023	3.24055	3.18745	3.15624	3.5764	4.79154	3.47753	4.86258	9.18819	4.31402	5.19214	3.78157	7.26349	3.25224	5.45467	5.2805	0.077191	6.55582	4.36005	0.737954	-0.126252
ENSG00000183054	RGPD6	610	604	609	572	625	635	640	764	819	749	615	636	559	549	551	690	478	650	805	838	2.19336	2.15686	1.97835	2.04201	2.16807	2.38127	2.20736	2.54908	3.25843	2.07269	1.98884	2.316	2.29704	1.97975	1.82177	2.83815	1.93448	2.39596	3.02879	2.75111	0.930074	0.00620056
ENSG00000250565	ATP6V1E2	83	68	53	89	42	61	42	72	62	101	46	49	37	52	30	38	48	99	71	113	1.14113	1.00532	0.6616	1.34968	0.594779	0.886637	0.532196	0.860831	0.930164	1.13111	0.596375	0.678479	0.592	0.784489	0.407822	0.587309	0.739659	1.38199	1.05364	1.40863	0.497833	-0.149282
ENSG00000162849	KIF26B	84	63	95	85	85	49	69	87	62	66	68	43	45	65	66	80	34	103	65	93	0.183465	0.144333	0.174818	0.182544	0.174841	0.112911	0.129103	0.157258	0.134149	0.108056	0.127223	0.092511	0.128631	0.15304	0.127214	0.178369	0.079135	0.226712	0.140733	0.175501	0.438027	-0.129131
ENSG00000184702	2024-09-05	81	155	935	494	608	66	268	886	224	223	181	143	328	575	296	278	165	1043	676	333	1.57748	2.19711	9.5881	6.40378	6.67175	1.17829	3.23237	8.31904	2.9595	2.90251	2.00156	1.99515	4.26762	7.124	3.71398	5.11397	3.0812	12.2078	8.52937	4.17599	0.846403	0.0895489
ENSG00000184708	EIF4ENIF1	775	780	860	725	726	677	820	903	782	1045	686	766	714	721	636	829	464	689	930	968	5.6287	5.6913	5.57818	5.2413	4.95596	5.00784	5.3393	5.36419	6.03113	6.29321	4.43497	5.69759	5.5965	5.30013	4.19054	6.76565	4.05366	4.89336	7.06792	6.76925	0.25928	-0.0647209
ENSG00000163463	KRTCAP2	1208	998	762	803	874	773	945	786	725	1798	884	793	726	1432	746	635	826	1217	867	913	55.4984	46.3159	31.0063	36.3944	37.7242	36.3018	39.0157	29.3257	34.8641	64.6401	36.2866	37.546	36.1963	66.7046	31.726	31.2065	43.3913	54.6016	41.2422	37.9889	0.990524	0.00185695
ENSG00000163466	ARPC2	5564	5436	6070	5348	5377	4962	5674	5872	5926	8891	5915	5703	5049	6271	5183	4817	4520	6126	5371	6399	93.9468	92.543	90.6343	87.8825	85.1355	82.3494	85.8645	80.4352	102.757	115.615	88.8492	99.0313	91.8829	106.976	80.9521	87.1046	87.4958	100.923	93.4914	97.9418	0.894915	-0.00823891
ENSG00000163468	CCT3	4427	4263	5169	4532	4406	4432	4393	5400	4701	5438	5300	4413	4488	4597	4800	4850	3390	4771	4106	4861	52.366	51.0249	54.395	52.9368	49.0521	53.698	46.6446	51.8894	58.1129	50.2203	55.9142	53.6693	57.5896	55.1041	52.627	61.4441	45.7997	55.106	50.2246	52.1671	0.697082	0.0238446
ENSG00000162599	NFIA	2308	1696	1681	1624	2133	1811	1952	2012	1835	3312	1726	2006	1535	2272	1679	1817	1188	2217	2268	2438	6.26414	4.64007	4.06945	4.37883	5.48759	4.99657	4.78117	4.4688	5.34966	7.08793	4.14573	5.58945	4.88384	6.19765	4.32316	5.31136	3.69269	5.86004	6.44304	5.9812	0.816904	-0.0207654
ENSG00000162591	MEGF6	582	389	340	430	247	188	371	399	407	870	261	546	268	478	328	685	180	406	584	690	2.91505	1.95522	1.42185	2.08945	1.09811	0.88795	1.63213	1.58949	2.03025	3.3138	1.08612	2.63555	1.37533	2.35231	1.43641	3.61455	1.01491	1.88481	3.0378	3.18221	0.509602	0.133742
ENSG00000029363	BCLAF1	3520	3565	4349	3264	3296	3430	3211	3869	4551	4196	4052	3947	3589	4107	3931	4640	2595	3626	3992	4567	12.9653	16.2373	15.5527	12.4731	12.0552	14.3794	11.258	11.3896	18.5606	12.7615	15.1162	16.1428	14.5755	15.9018	14.0429	19.3712	11.5674	13.3495	17.9703	15.8167	0.0259305	0.131425
ENSG00000162595	DIRAS3	224	173	192	171	118	151	140	157	183	278	186	294	91	141	218	178	120	258	221	352	3.10464	2.8759	2.19246	2.50085	1.38224	2.63615	1.78158	1.62309	2.74352	3.15605	2.78789	4.0615	1.22988	2.19315	3.33474	3.24705	2.05831	3.63266	3.17634	4.38858	0.126528	0.259143
ENSG00000118640	VAMP8	373	345	235	276	254	239	294	218	286	720	166	245	175	625	161	303	261	476	200	342	12.9014	12.4325	7.50446	9.80365	8.43932	8.28767	9.12015	6.49912	10.2911	19.1842	5.20008	8.72333	6.79442	21.4367	5.4498	11.3057	10.0562	16.5509	7.2103	10.7156	0.88218	-0.0348112
ENSG00000168488	ATXN2L	1456	1253	1471	1377	1220	1049	1383	1706	1391	1536	1180	1442	1125	1125	1291	1748	924	1250	1399	1664	9.90836	8.32488	8.52813	10.7019	8.53887	7.22202	7.65433	9.41555	10.0494	9.19218	6.92887	9.64184	8.38298	8.155	9.40117	12.7676	7.59663	7.81699	10.1742	11.0303	0.877859	-0.0104023
ENSG00000115073	ACTR1B	2428	2310	2546	2191	2224	2086	2458	2767	2225	3109	2695	2567	2109	2505	2363	2651	1538	2396	2779	3241	27.4662	26.398	25.5216	24.4528	23.6399	24.1329	24.9927	25.4174	26.3314	27.5048	27.239	29.9257	25.8927	28.7259	24.7309	32.0608	19.9013	26.4696	32.5265	33.2096	0.0404285	0.0906392
ENSG00000213853	EMP2	3313	2789	3727	3607	2989	3194	2487	3135	3367	4229	2964	3046	2686	3049	3194	3423	2279	2793	2755	4240	16.3841	13.8183	16.4305	17.625	14.0111	16.1858	11.2258	12.5403	17.5748	16.2836	13.0768	15.6977	14.5403	15.3099	15.0269	17.9298	13.2279	13.5352	14.2947	19.0544	0.53917	-0.0461056
ENSG00000213859	KCTD11	373	372	432	374	352	310	341	408	456	516	387	348	279	407	345	497	253	381	500	560	3.23564	3.39055	3.32671	3.31703	3.0031	2.86515	2.76704	2.88289	4.30366	3.50499	2.93342	3.10989	2.73648	3.57677	2.71556	4.80403	2.5152	3.10369	4.67531	4.40609	0.386937	0.0667108
ENSG00000055070	SZRD1	3485	3270	3265	2909	3196	2490	3381	3868	3158	4822	3108	2952	2910	3475	3022	3496	2197	3619	3777	4314	27.0374	24.4622	22.0494	21.5431	22.4661	19.4684	22.7141	24.2989	24.7269	27.9016	21.0425	22.3817	24.765	27.1038	20.9442	28.8334	18.6266	26.5625	29.4808	28.7396	0.580763	0.0286463
ENSG00000162337	LRP5	1621	1341	1936	1850	1482	1280	1423	1990	1651	1740	1480	1158	1300	1009	1536	2080	874	1129	1870	1946	8.22584	6.78704	8.67061	9.23818	6.99423	6.60476	6.35365	8.00711	8.69756	6.80888	6.62247	6.23011	7.20432	5.27394	7.44834	11.2046	5.10864	5.49566	9.84226	8.94444	0.256469	-0.129395
ENSG00000182013	PNMA8A	653	647	881	857	645	684	839	1035	980	1048	979	752	902	668	992	822	588	858	977	1401	4.48797	4.52466	5.36683	5.82235	4.16531	4.80993	5.18748	5.77769	7.0596	5.95925	6.18068	5.35581	6.72723	4.90317	6.3129	6.04366	4.64323	5.76311	6.94845	8.72986	0.071065	0.182032
ENSG00000164659	KIAA1324L	183	195	236	264	272	241	181	300	261	343	159	275	265	234	177	205	131	259	227	357	0.677251	0.729499	0.838286	0.963437	0.944937	1.59137	0.600731	0.968678	1.06503	0.992564	0.526403	1.04784	1.06425	0.876282	0.604657	0.81193	0.55163	0.955217	0.869103	1.19763	0.698374	-0.0515229
ENSG00000164654	MIOS	1646	1671	1681	1297	1330	1408	1370	1572	1368	1543	1592	1772	1275	1533	1390	1878	1056	1750	1686	2367	13.1598	14.2045	12.6917	10.3825	10.0545	12.0041	9.86458	10.1118	11.9675	9.48175	11.4277	15.2632	11.6779	12.4478	10.1631	16.7584	9.64862	14.2786	13.7957	17.1003	0.0286918	0.175107
ENSG00000114978	MOB1A	2782	2583	2987	2449	3118	2609	3026	3305	3477	4464	2554	2563	2511	3141	2604	2821	2011	3101	2851	3201	14.4505	13.551	13.7501	12.5489	15.2165	13.8581	14.1274	13.942	18.8936	18.1376	11.8539	13.7215	14.1525	16.5358	12.5129	15.6667	11.9429	15.7294	15.3221	15.0594	0.104431	-0.0913346
ENSG00000169740	ZNF32	2034	2025	1905	1982	1724	1554	2116	1922	1869	3695	1884	2011	1621	2702	1623	1328	2137	2315	1722	1981	44.5811	44.9321	37.2084	42.8776	35.8139	35.0141	42.0403	34.2165	42.9372	63.5424	36.9432	45.2713	38.7858	60.3281	33.4135	31.0326	53.7874	49.7164	39.2423	39.2788	0.955908	0.00750103
ENSG00000161021	MAML1	987	925	957	925	946	813	912	1159	1209	1052	870	983	814	913	1017	1149	562	869	1254	1200	4.37333	4.1426	3.75874	4.04514	3.93756	3.68494	3.63144	4.17259	5.6078	3.64762	3.44552	4.48968	3.91369	4.09982	4.17168	5.44729	2.85	3.76286	5.74964	4.8199	0.821164	0.0168305
ENSG00000169744	LDB2	1567	1531	1870	1842	2180	2172	1780	2007	2226	2130	1724	1417	1973	1401	1539	1411	1214	1997	1844	1679	16.089	16.1027	17.1565	18.7049	21.2259	23.1958	16.5889	17.2594	24.5636	17.1216	15.9139	15.1517	21.9268	14.9105	14.7319	15.7164	14.1866	20.2747	19.6405	16.0113	0.102599	-0.18328
ENSG00000119509	INVS	247	192	207	176	148	118	158	225	204	196	157	166	109	198	188	205	91	205	191	200	1.89093	1.41878	1.2869	1.26385	0.966432	0.855262	0.985644	1.28412	1.53736	1.16148	1.05782	1.19005	0.809518	1.41457	1.25616	1.53407	0.711234	1.52067	1.42373	1.34378	0.535236	-0.0730232
ENSG00000165300	SLITRK5	89	86	204	164	119	110	58	121	155	167	131	129	138	96	133	122	99	123	145	261	0.105979	0.103361	0.216547	0.193938	0.134254	0.134352	0.062107	0.117966	0.193835	0.156949	0.140176	0.158939	0.179869	0.116248	0.147538	0.156862	0.136132	0.143796	0.180125	0.283423	0.348711	0.175598
ENSG00000101608	MYL12A	41510	41548	24092	27237	27060	24330	23421	27293	31485	64574	33847	26181	20310	37176	34953	29677	26848	32956	27802	49752	1063.9	968.06	480.925	607.007	581.692	637.997	470.98	495.514	754.838	1177.46	687.388	608.473	493.015	865.677	739.08	730.371	697.77	737.874	654.689	1045.94	0.845113	0.0285406
ENSG00000101605	MYOM1	16346	15679	23730	18335	14711	15441	16786	24712	16598	15750	21565	18016	19295	11090	21849	18692	6706	15095	18949	21139	75.4275	70.2916	97.9784	85.0065	62.5001	69.1947	70.0901	94.8763	81.2403	54.8186	85.4954	82.135	92.9021	49.9075	92.534	95.4245	34.0812	66.4304	88.6539	89.2728	0.983764	0.00299666
ENSG00000198791	CNOT7	3664	3936	4233	3292	3857	3880	3701	4238	3877	5207	4349	4373	3507	4080	4101	4121	3225	4232	3812	5109	17.1962	18.8553	17.4298	14.9502	17.1583	18.8006	15.798	15.7751	18.3771	18.7226	16.9418	20.2835	17.6591	19.6526	16.7903	21.2272	16.9637	18.8917	18.2938	21.7224	0.0476429	0.108301
ENSG00000198792	TMEM184B	1875	1452	1960	1750	1679	1698	1695	2186	1705	2055	1793	1601	1644	1349	1678	2082	887	1772	1850	2122	13.4049	10.4553	12.3417	12.3269	11.2624	12.51	11.1542	12.7601	12.7892	11.4261	11.3236	11.9564	12.6113	9.72145	11.1267	16.065	7.32095	12.3923	13.6327	13.7233	0.514831	-0.0520633
ENSG00000198793	MTOR	1181	1046	1884	1590	1380	1273	1313	1692	1560	1406	1276	1171	1303	980	1229	1732	852	1117	1193	1365	3.86891	3.44227	5.12109	5.10159	4.77223	4.83428	3.80983	4.33219	5.35704	4.15426	5.43868	4.3813	4.80442	3.5096	3.96564	5.5831	3.85347	4.51142	4.39261	4.53899	0.125038	-0.164905
ENSG00000198794	SCAMP5	361	265	360	258	303	253	439	438	331	473	300	304	220	257	306	379	210	277	364	283	2.92832	2.01325	2.44663	1.91264	2.11863	1.99619	2.97747	2.79632	2.85033	2.76124	2.0062	2.67437	1.99598	1.98543	2.10895	3.02331	1.79903	2.0311	2.92625	1.95916	0.0702553	-0.182398
ENSG00000198795	ZNF521	982	977	621	601	644	582	673	786	951	1369	813	797	649	1242	787	1053	526	1064	1214	1333	5.2445	5.84286	2.93974	3.37287	3.24151	3.29354	3.15897	3.45278	5.4833	5.85707	4.00887	4.46992	3.86521	7.10834	3.87545	6.14692	3.18459	5.63255	6.7031	6.57621	0.032881	0.274941
ENSG00000197779	ZNF81	77	68	130	102	67	73	114	84	193	120	54	120	117	81	93	140	77	103	83	97	0.389517	0.219051	0.693573	0.493522	0.20066	0.236986	0.421932	0.216538	1.23969	0.358597	0.299182	0.442343	0.575581	0.262611	0.275008	0.686357	0.28152	0.318788	0.352736	0.279585	0.995913	-0.000999727
ENSG00000198799	LRIG2	759	665	885	916	712	646	596	1006	880	770	807	841	744	669	847	840	569	686	848	1035	1.66562	1.47517	1.72187	1.98398	1.46885	1.45083	1.17506	1.79267	2.0216	1.32124	1.58341	1.90212	1.77158	1.48738	1.71962	1.97037	1.42836	1.46963	1.92704	2.05806	0.414571	0.0737976
ENSG00000175550	DRAP1	1517	1482	1300	1519	1275	1085	1643	1710	1187	2475	1776	1257	1157	1553	1399	1347	1003	1598	1519	1857	41.1254	40.0402	31.1257	39.2358	31.7712	28.9224	40.187	36.1183	32.886	51.4022	42.9525	34.7312	33.1254	41.1329	34.0508	38.023	30.1918	40.8968	42.3477	45.6766	0.928692	0.00808943
ENSG00000175556	LONRF3	118	87	128	90	57	93	70	60	121	79	28	93	85	99	83	179	52	106	101	112	1.02551	0.830734	1.03045	0.778909	0.451114	0.924444	0.607944	0.410858	1.18077	0.521706	0.21859	0.80656	0.897007	0.905333	0.640066	1.8002	0.490578	0.994597	0.885818	0.933434	0.695267	0.0897926
ENSG00000197771	MCMBP	1804	1758	2228	1749	2055	2101	1759	2154	2079	2461	1876	1927	1789	1849	1696	1812	1217	1683	1903	2281	11.9066	11.7722	13.1279	11.3053	12.491	14.3634	10.5014	11.6857	14.6347	12.8414	10.8561	12.8933	13.09	12.6665	10.2328	13.1366	8.95133	10.8106	12.7263	13.3936	0.123781	-0.0968833
ENSG00000161682	FAM171A2	51	34	75	66	46	54	40	71	50	100	37	46	34	82	22	55	44	75	51	57	0.409045	0.274146	0.52834	0.530295	0.346395	0.439333	0.28382	0.457404	0.418044	0.626368	0.280589	0.380714	0.292877	0.684014	0.161589	0.47099	0.400213	0.582787	0.437323	0.407515	0.513673	-0.134856
NewGene_10983	NewGene_10983	582	650	207	275	189	203	305	302	338	768	268	416	139	587	445	367	551	631	499	437	10.4109	12.0318	2.5445	3.69728	2.97952	2.97274	5.26994	3.28852	4.96767	12.8707	3.74525	8.43124	2.31507	14.3862	6.99558	5.75672	13.9675	13.1437	9.36606	5.73866	0.25278	0.305091
NewGene_10985	NewGene_10985	25	22	24	37	28	49	52	52	74	96	34	49	63	64	29	32	31	82	39	60	0.359241	0.332403	0.30151	0.525867	0.377841	0.728432	0.671419	0.605498	1.13821	1.08483	0.43257	0.755094	1.04866	0.940133	0.384559	0.495807	0.516388	1.18638	0.605908	0.799656	0.4897	0.182027
NewGene_10987	NewGene_10987	586	574	476	482	515	417	608	522	409	837	562	473	398	650	537	405	444	630	548	576	14.3742	14.1162	9.8518	10.8602	11.3872	10.5056	12.3044	9.55226	10.2458	16.5732	12.5412	11.3037	10.7003	15.6758	12.2835	9.44452	11.973	15.2911	12.3973	11.6524	0.796984	0.0284563
ENSG00000100288	CHKB	846	479	525	634	523	417	684	771	628	1127	530	764	569	830	707	737	558	620	884	634	13.0946	7.48131	7.20688	9.68655	7.61209	6.59205	9.52398	9.6958	10.1738	13.6509	7.32714	12.197	9.55018	13.0324	10.1267	12.1943	9.87603	9.37364	14.1561	8.88928	0.234224	0.144807
ENSG00000183864	TOB2	2842	3065	4787	3759	3356	3230	3981	5179	3442	3237	3542	3199	3605	2312	3556	3120	2212	2633	3714	3003	15.8345	17.2794	23.6168	20.6814	17.5691	18.3858	19.9382	23.4161	20.1009	14.1146	17.6333	18.3577	21.8717	13.0392	18.344	18.7201	14.0761	14.3284	21.4064	15.1548	0.148428	-0.180908
ENSG00000124217	MOCS3	235	201	287	192	250	262	232	250	228	280	242	219	184	199	209	260	107	209	238	249	1.16465	1.00613	1.26175	0.939175	1.1655	1.32715	1.03428	1.00697	1.18328	1.08578	1.07051	1.11805	0.990127	0.999353	0.959877	1.3792	0.60587	1.01155	1.22001	1.11742	0.141308	-0.140047
ENSG00000124214	STAU1	3259	2965	3371	3019	3217	2929	3013	3655	3305	4342	3320	3237	2950	3058	3167	3659	2127	3388	3357	4298	24.5525	22.3086	21.2167	22.0086	22.3686	22.8247	19.8519	21.9939	26.4705	24.7824	21.943	24.6258	24.3475	22.5505	21.8663	29.1782	18.1167	24.9877	26.563	29.0276	0.245761	0.0420712
ENSG00000124212	PTGIS	1472	961	903	899	880	875	891	883	873	1739	651	1125	565	1112	612	1105	962	993	1274	1318	6.69542	4.41153	3.63833	4.03032	3.75766	4.0678	3.64007	3.25905	4.15399	6.18703	2.645	5.27182	2.78838	5.12497	2.57371	5.37222	5.00125	4.4085	5.99187	5.42892	0.926535	-0.0139713
ENSG00000247596	TWF2	4639	3928	6304	5409	5368	4478	5260	7058	5648	6961	6142	4179	5313	3769	5204	4639	3418	4388	4836	5617	68.5243	58.6006	82.5165	78.8184	74.5012	67.6342	69.8243	84.6614	87.2853	80.4152	81.0758	63.6146	85.1621	56.4199	71.1136	73.2651	57.7436	63.2935	73.903	75.1519	0.178846	-0.128652
ENSG00000161970	RPL26	20233	19802	13369	18137	16345	14310	22156	16035	12705	42827	15175	17662	13953	28542	13866	10470	20246	24224	16468	15360	894.175	931.381	531.172	806.408	668.357	658.435	893.854	584.165	550.378	1394.33	608.232	829.246	663.654	1209.59	574.237	508.868	1047.46	1070.93	746.004	628.577	0.898471	-0.0249774
ENSG00000160087	UBE2J2	1341	1122	1359	1258	1024	1143	1220	1368	1154	1875	1306	1185	1065	1331	1268	1242	888	1307	1314	1544	20.6962	17.3478	19.6537	20.5271	16.6555	16.5799	15.2235	16.3574	16.3568	19.7796	14.9077	17.6295	13.6041	17.5227	18.1562	17.964	12.1841	17.5745	21.188	18.4929	0.594919	0.0274457
ENSG00000036054	TBC1D23	1141	1211	1558	1221	1356	1249	1421	1545	1797	2001	1236	1276	1062	1510	1207	1367	1038	1275	1471	1645	7.86794	8.43759	9.5204	8.30891	8.78683	8.81222	8.81029	8.6593	12.9979	10.7986	7.62068	9.07165	7.9497	10.5575	7.69804	10.0727	8.19795	8.60226	10.5004	10.277	0.271356	-0.0708723
ENSG00000002587	HS3ST1	83	73	66	72	130	122	69	53	68	83	141	139	98	102	129	169	56	132	133	156	0.261458	0.232891	0.183394	0.221777	0.38311	0.39425	0.193568	0.134065	0.224771	0.222997	0.397593	0.451034	0.332986	0.386502	0.374411	0.570791	0.199131	0.406676	0.433707	0.445793	0.00100425	0.629154
ENSG00000002586	CD99	8131	6821	4263	4135	4285	4105	5903	5444	3800	10192	3823	5100	2230	7975	2958	4546	2689	5364	6967	5405	189.426	162.418	89.7109	95.9072	94.0021	99.5846	123.954	104.726	93.6227	183.783	81.4937	123.995	52.4263	188.733	61.4511	111.476	71.5726	124.624	169.75	115.649	0.254081	-0.215179
NewGene_10323	NewGene_10323	45	24	60	27	34	21	58	38	26	58	35	41	45	40	32	29	43	52	37	51	1.12848	0.607037	1.35655	0.664332	0.815338	0.526735	1.31901	0.772417	0.679458	1.14838	0.79499	1.0574	1.22549	1.02195	0.740504	0.782595	1.23965	1.27846	0.966079	1.16613	0.464239	0.153586
NewGene_7754	NewGene_7754	80	73	85	58	58	54	47	71	41	26	61	70	99	86	57	124	64	58	66	81	0.61339	0.56569	0.578923	0.441312	0.416828	0.418923	0.324002	0.444739	0.323728	0.154332	0.417487	0.550521	0.824325	0.665484	0.404661	1.01886	0.561366	0.435614	0.51937	0.559655	0.0575283	0.42081
NewGene_1347	NewGene_1347	92	46	43	85	75	70	46	58	63	113	76	78	39	71	89	63	55	81	65	114	1.02321	0.511129	0.421109	1.00933	0.776446	0.795258	0.460332	0.522573	0.723351	0.978326	0.796896	0.893681	0.475256	0.840747	0.910547	0.740713	0.69401	0.988407	0.799593	1.14737	0.431018	0.143527
NewGene_1341	NewGene_1341	233	165	82	157	103	55	209	226	266	212	103	215	125	145	201	173	155	90	228	263	1.11242	0.794016	0.345926	0.737654	0.470017	0.266437	0.918943	0.875841	1.3252	0.789755	0.437071	1.05406	0.647174	0.700221	0.887815	0.881435	0.845594	0.415529	1.12614	1.13622	0.727418	0.0818274
NewGene_1342	NewGene_1342	65	21	85	27	34	61	77	74	0	50	58	102	41	53	22	109	22	108	126	39	0.376443	0.120022	0.441058	0.15489	0.182381	0.36019	0.404529	0.35041	0	0.227398	0.301007	0.613647	0.25708	0.311695	0.115992	0.678231	0.144128	0.613066	0.758997	0.203296	0.262689	0.496894
ENSG00000177954	RPS27	6272	6285	3279	5078	5900	4193	5048	4190	3908	13143	5269	5186	4444	8480	3917	2955	6418	7526	5448	5111	431.131	438.238	199.698	343.388	382.337	295.732	310.493	233.106	281.056	711.094	324.714	364.462	330.067	588.714	247.28	216.357	506.297	506.604	388.134	316.223	0.758428	0.0644548
ENSG00000177951	BET1L	1593	1149	1000	1064	953	968	1226	1303	1399	2358	1244	1018	802	1352	1155	1135	754	1427	1480	1398	14.3433	10.4277	7.94965	9.48868	8.10477	8.80476	9.85607	9.45405	13.2796	16.5765	9.9355	9.34022	7.78857	12.2724	9.5535	10.9828	7.77165	12.4996	13.7198	11.4185	0.575296	-0.0613704
ENSG00000198242	RPL23A	18242	16520	10050	12719	10694	10177	17458	12054	9699	30666	13150	12697	10867	23004	12361	8358	15825	20765	13721	12474	297.403	271.343	144.929	204.22	163.924	169.327	255.056	159.475	165.059	390.365	191.222	214.961	192.631	379.174	186.089	145.525	294.551	329.837	231.297	184.271	0.70849	0.074439
ENSG00000135070	ISCA1	3678	3967	4338	3619	3721	3597	4275	4676	3860	5536	4068	3620	3803	4594	4209	3304	3367	4108	3537	3994	47.9218	52.1402	50.1519	46.5575	45.493	47.8289	50.131	49.4249	52.8587	56.4619	47.2489	48.7343	53.8406	60.7303	50.6547	45.9951	50.0632	52.142	47.7437	47.2295	0.943359	-0.00555329
ENSG00000198246	SLC29A3	153	95	79	64	81	48	66	112	125	212	42	73	71	217	99	112	56	109	154	190	1.71164	1.06223	0.680788	0.679753	0.731784	0.543932	0.577247	0.86756	1.41481	1.83628	0.407381	0.721939	0.778599	2.30638	1.03661	1.31063	0.67222	1.15161	1.68967	1.90653	0.439704	0.195119
ENSG00000092140	G2E3	484	578	631	450	498	467	597	565	735	763	510	569	501	631	508	677	483	545	612	698	2.31864	2.55213	2.48914	1.94828	2.04502	2.10672	2.34523	2.00416	3.36536	3.59075	1.99166	2.5767	2.37544	2.8103	2.05469	4.54838	2.43113	2.37136	2.77995	4.10351	0.352703	0.0695351
ENSG00000135916	ITM2C	2927	2397	3078	2657	3266	2680	3166	4029	3774	3990	3312	2574	2353	2270	2544	2524	1716	3054	2066	2443	36.19	29.5841	33.7399	32.6866	37.7192	33.4943	35.2522	39.9762	48.2423	38.2566	36.3721	32.4185	31.258	28.3794	29.2286	33.5383	23.9892	36.4433	26.2708	27.0405	0.00291341	-0.279827
ENSG00000135913	USP37	492	476	630	372	530	465	499	596	520	535	524	498	525	440	493	571	307	533	502	536	1.5543	1.7634	1.76239	1.36503	1.57066	1.5005	1.43203	1.52789	2.11253	1.32141	1.47702	1.61912	1.80004	1.40748	1.43868	1.92779	1.10919	1.64265	1.64078	1.53034	0.89305	0.0114591
ENSG00000135912	TTLL4	235	202	250	212	194	159	188	210	202	278	202	224	207	188	208	242	158	224	154	202	1.21779	1.12891	1.15691	1.08448	0.990089	0.868929	0.87617	0.912348	1.10208	1.18252	0.999899	1.26979	1.13875	0.981977	1.0286	1.42989	0.967468	1.11631	0.813183	0.986245	0.976224	-0.00285013
ENSG00000092148	HECTD1	4565	4444	6905	5072	5212	4855	4793	6687	6214	4753	4679	5111	4891	3855	5124	6376	3005	4498	4951	5793	13.8673	15.3705	18.0377	14.5334	14.0509	14.7163	12.2038	16.3014	18.8134	10.9231	26.8779	17.0862	15.799	13.5925	13.4723	22.779	9.91167	12.8363	14.4623	15.1286	0.35958	-0.0915149
ENSG00000034693	PEX3	604	642	646	523	599	579	652	665	647	772	592	609	584	579	561	521	469	567	601	712	8.23211	8.94927	7.83349	7.08351	7.71873	8.0517	8.20209	7.24732	9.21968	8.07716	6.99758	8.52719	8.71053	8.02416	7.13413	8.01079	7.43167	7.69572	8.4364	8.70221	0.389696	-0.0535101
ENSG00000135919	SERPINE2	1016	1013	970	985	928	1060	1096	1391	1314	1748	849	861	807	730	677	899	667	1191	951	1410	12.0557	11.9326	10.0597	11.3174	10.1925	12.7457	11.5171	13.2393	16.1062	15.9172	8.88928	10.362	10.2503	8.65459	7.28277	11.1756	8.93888	13.5354	11.4882	15.0115	0.00432941	-0.27546
ENSG00000176396	EID2	347	414	384	373	370	387	558	586	518	716	537	425	356	369	346	391	334	491	509	522	5.39798	6.49972	5.29052	5.72536	5.40156	6.15853	7.81285	7.41035	8.44037	8.71763	7.46394	6.81628	6.00741	5.8246	4.98252	6.50035	5.9401	7.45636	8.1951	7.36336	0.74721	-0.033854
ENSG00000176390	CRLF3	309	262	266	211	323	230	344	296	336	388	227	218	244	273	237	293	264	311	262	329	2.64707	2.40185	2.02292	1.7839	2.6594	2.01003	2.65199	2.11462	3.01191	2.6045	1.8525	2.01645	2.48826	2.37339	1.877	2.68603	2.61315	2.60427	2.32416	2.55032	0.472247	-0.0741326
ENSG00000176393	RNPEP	1076	925	701	795	868	731	764	1119	857	1498	730	952	700	1171	911	1013	582	1161	1122	1290	11.2631	9.78837	6.51604	8.24052	8.55576	7.98845	7.23128	9.50018	9.41144	12.3133	6.81526	10.307	8.05247	12.4566	8.82961	11.3891	6.96738	11.931	12.129	12.2178	0.263992	0.113651
ENSG00000176399	DMRTA1	123	125	48	19	41	39	126	117	33	75	123	127	51	76	97	87	23	80	61	81	0.556804	0.572608	0.190108	0.085156	0.174632	0.180629	0.512877	0.430364	0.153425	0.26592	0.497052	0.595579	0.249856	0.347053	0.405745	0.420516	0.118202	0.351576	0.283504	0.331288	0.611949	0.163215
ENSG00000083635	NUFIP1	191	194	262	196	210	183	226	318	190	231	238	232	247	189	262	197	185	216	206	231	1.38367	1.42017	1.6868	1.39984	1.43179	1.35283	1.47256	1.87432	1.44294	1.31046	1.54218	1.73233	1.94697	1.38735	1.75937	1.52777	1.53171	1.5329	1.54734	1.5172	0.435142	0.08736
NewGene_1694	NewGene_1694	99	82	59	57	74	53	79	59	35	137	102	92	42	110	58	46	107	94	50	95	2.63575	2.19402	1.38586	1.49208	1.84167	1.44194	1.86825	1.26507	0.948476	2.84917	2.7333	2.61024	1.19403	3.26973	1.64773	1.28762	3.56665	2.81024	1.37363	2.27161	0.345505	0.229959
ENSG00000147872	PLIN2	1053	924	1122	1067	806	753	1005	1293	990	1457	731	843	740	981	784	963	666	908	875	1157	13.546	11.997	12.7913	13.5404	9.73931	9.89711	11.6813	13.5081	13.3206	14.6528	8.40091	11.1771	10.3273	12.8259	9.4438	13.295	9.79462	11.4091	11.6386	13.4772	0.00232734	-0.197582
ENSG00000167536	DHRS13	85	83	97	78	74	113	62	100	88	134	127	92	92	95	89	116	57	93	90	155	1.08398	1.07994	1.10877	0.982446	0.891664	1.49855	0.687908	1.0263	1.17671	1.30632	1.46658	1.22971	1.23756	1.22652	1.01483	1.59683	0.832541	1.15395	1.17812	1.77407	0.123623	0.197869
ENSG00000167535	CACNB3	349	184	152	146	187	161	152	212	173	280	150	239	125	215	127	291	96	223	252	362	3.74247	1.84916	1.26802	1.36713	1.68308	1.55893	1.36776	1.98219	1.69613	2.10532	1.20034	2.41081	1.38767	2.12362	1.10341	2.91802	0.978244	2.04758	2.45327	3.16696	0.601971	0.0947041
ENSG00000094796	KRT31	102	98	99	95	58	70	29	72	83	162	72	78	34	77	22	103	22	105	57	228	1.61713	1.57013	1.38979	1.48842	0.86333	1.13188	0.403979	0.922641	1.37737	2.0032	1.01208	1.26714	0.584712	1.23549	0.314543	1.74243	0.395352	1.63031	0.92146	3.27619	0.719035	-0.111723
ENSG00000153207	AHCTF1	1108	1210	1267	1094	980	1158	1028	1388	1491	1500	981	1075	1034	919	1062	1287	727	1018	1223	1305	3.21045	3.48541	3.20376	3.07961	2.6661	3.37853	2.63376	3.21591	4.5497	3.42479	2.5012	3.15618	3.20014	2.69578	2.80358	3.92677	2.40792	2.88037	3.63585	3.37155	0.0430528	-0.133266
NewGene_2583	NewGene_2583	89	61	68	63	71	57	127	96	127	98	53	61	31	107	67	83	71	73	64	115	0.581	0.403018	0.394142	0.406183	0.430624	0.377988	0.744689	0.510075	0.864706	0.498553	0.305299	0.405849	0.216267	0.70741	0.400442	0.578002	0.529499	0.462543	0.429604	0.676206	0.374287	-0.171004
ENSG00000177042	TMEM80	606	467	538	483	402	415	551	597	558	865	454	492	326	455	735	480	470	517	721	764	12.2448	9.39479	9.67858	9.35464	7.72305	8.73842	10.0338	9.98508	10.0896	13.6069	7.93379	9.85874	7.25017	9.09143	13.9881	10.6369	11.0343	10.269	14.4361	13.9648	0.572972	0.0677501
ENSG00000129566	TEP1	699	585	663	701	586	558	604	680	665	785	620	506	497	565	559	874	434	536	714	764	1.65726	1.4017	1.51125	1.65559	1.31333	1.35775	1.48241	1.68522	1.9069	1.45517	1.34252	1.47518	1.35178	2.25954	1.22716	2.21588	1.20006	1.32394	1.90956	1.75773	0.554548	-0.0459144
ENSG00000177045	SIX5	861	704	569	631	516	552	759	876	759	1094	640	717	458	928	604	804	438	824	1021	1021	8.18399	6.19768	4.50748	5.67568	4.22505	5.71928	5.69393	6.40288	7.0387	7.77598	5.19539	6.62564	4.29058	8.08729	5.17819	7.75242	4.62487	7.00192	9.94326	8.47272	0.432696	0.0884306
ENSG00000141232	TOB1	2519	2463	3158	3110	3022	3020	3021	3892	2753	3455	2923	3005	2835	2048	2783	2188	2076	2861	2907	4074	28.819	28.5017	32.1692	35.5159	32.4366	35.3058	31.0566	36.1464	32.9357	30.8691	29.8503	35.4205	35.0719	23.8019	29.4292	26.7709	27.2304	31.9814	34.3673	42.1837	0.4884	-0.0695024
ENSG00000136754	ABI1	1407	1276	1283	1166	1259	1331	1297	1592	1581	1967	1333	1551	1088	1592	1220	1427	890	1360	1417	1853	10.156	9.29202	8.17826	8.28285	8.52001	9.82499	8.41498	9.28047	12.2048	11.0915	8.60054	11.77	8.49429	11.7026	8.10983	11.0981	7.35462	9.54456	10.5334	12.1151	0.716776	0.0212512
ENSG00000136758	YME1L1	5032	5115	6466	5139	5075	5100	5602	7076	5777	6595	5179	5132	5492	4861	5094	5374	3915	5245	5549	6236	32.5692	33.1892	37.3366	32.8347	30.1002	33.8299	32.8562	37.0331	39.2701	33.2747	29.9669	34.3952	38.5869	31.9918	30.5427	37.5363	29.0711	33.2938	36.9068	36.6681	0.317592	-0.0547099
ENSG00000116017	ARID3A	57	86	116	88	67	62	114	133	92	107	79	62	85	81	88	107	59	63	86	74	0.242773	0.367463	0.438557	0.369393	0.265151	0.268231	0.435996	0.458461	0.407678	0.355071	0.299753	0.271645	0.389621	0.347056	0.347667	0.487364	0.283547	0.262731	0.378842	0.282995	0.31672	-0.149192
ENSG00000116016	EPAS1	7515	8013	14257	14636	15898	12982	9839	15071	12624	7449	10171	8535	10450	5147	9852	11799	5740	8669	9327	12330	36.9349	39.7685	62.1649	70.9723	73.3846	65.2152	43.4393	60.1259	64.8826	28.6203	44.6463	43.2064	55.7043	25.6259	44.779	61.9751	32.2435	41.5882	47.4039	54.8645	0.0680388	-0.326578
ENSG00000187961	KLHL17	120	114	172	123	117	83	146	89	141	228	130	129	57	123	93	152	69	108	168	138	1.35631	1.20707	1.56892	1.26977	1.10151	0.844851	1.31377	0.836091	1.4725	1.8998	1.34139	1.42743	0.62195	1.39915	0.903971	1.71006	0.863622	1.08627	1.95711	1.29458	0.428884	-0.125534
ENSG00000187244	BCAM	2896	2721	4191	4188	4308	4073	3126	5377	3775	3086	4570	3697	3791	2169	4795	5463	1855	3355	3860	4796	28.8378	27.8265	37.1624	41.5467	40.5611	42.2378	27.9265	44.0065	39.9289	23.7782	40.9829	37.7143	41.7435	21.9319	44.9918	58.8984	21.6166	33.2107	40.0443	43.6692	0.698728	0.0618361
ENSG00000174099	MSRB3	4160	4824	5543	4432	4411	4567	4489	5680	4682	6263	4419	4541	4473	4980	4531	5571	3343	4916	4533	6197	24.3682	29.5891	29.4094	25.4007	24.9062	27.4906	23.5506	27.2622	29.1725	28.6287	23.0448	27.2091	28.1667	29.4098	24.6426	35.1518	22.3172	29.2352	27.369	32.7117	0.694933	0.0203439
ENSG00000137409	MTCH1	6154	5343	5857	4631	5351	4881	5749	6546	5112	8300	5528	5695	4714	6566	5116	5468	4135	5838	6094	6429	77.8817	68.0597	65.5011	57.4299	63.2774	62.7534	65.148	67.1022	67.6208	81.5918	62.0969	74.1018	64.2985	84.026	59.4102	73.8051	59.7024	71.8121	79.3871	73.392	0.730344	0.0187076
ENSG00000137404	NRM	219	185	190	232	217	248	152	241	183	311	256	249	147	237	210	193	154	196	273	256	3.22857	2.82207	2.53893	3.3785	3.10188	3.76612	2.04644	2.93414	2.81274	3.6242	3.65989	3.74801	2.38278	3.5207	2.90098	3.17643	2.58586	2.83237	4.29401	3.49656	0.610201	0.0591514
ENSG00000235194	PPP1R3E	757	682	724	756	561	617	706	971	752	862	848	874	627	712	791	848	644	660	884	1097	5.39216	4.51831	4.42446	4.51069	3.68541	4.37661	4.32671	5.34998	5.44397	4.92635	5.0736	5.83317	4.75321	4.87512	4.84988	6.39542	5.49152	4.48484	6.04013	6.72427	0.0145557	0.182917
ENSG00000060138	YBX3	34124	38116	38658	35154	29275	29274	40318	36747	28577	50410	30296	28165	26655	47327	28229	29106	33035	33045	30444	41499	496.504	562.861	500.873	505.506	402.288	437.976	529.493	436.142	438.257	575.25	394.667	424.398	421.846	702.58	381.082	453.963	553.481	471.359	459.392	549.809	0.638099	-0.0516542
ENSG00000130758	MAP3K10	653	563	785	750	513	461	723	859	579	793	473	482	528	604	578	818	416	625	555	711	5.206	4.19968	5.19505	5.46488	3.68104	3.4717	4.81767	5.14739	4.57277	4.60238	3.1657	3.69063	4.36701	4.59296	3.9808	6.48476	3.53535	4.61917	4.37491	4.86144	0.163493	-0.135684
ENSG00000130755	GMFG	231	136	142	183	161	156	181	150	287	474	170	98	115	228	176	129	153	203	131	134	7.2965	4.34878	3.75518	6.06872	4.65838	5.23268	5.23152	3.98788	9.23385	12.3116	4.4854	3.2148	3.99406	7.37094	5.53501	4.29389	5.38826	6.07903	4.32456	3.92754	0.106373	-0.320653
ENSG00000009694	TENM1	48	34	44	46	27	12	6	32	77	74	37	32	43	50	51	89	14	42	42	105	0.093262	0.06638	0.075451	0.088597	0.049386	0.023703	0.009944	0.050789	0.156797	0.113268	0.063379	0.063015	0.091063	0.097851	0.092506	0.186507	0.0308	0.07903	0.083828	0.184991	0.23405	0.393997
ENSG00000110756	HPS5	538	557	720	485	527	457	594	677	717	679	552	487	463	543	424	708	303	512	631	585	3.17524	3.07568	3.57863	2.64147	2.68519	3.15591	3.06662	3.32813	4.16753	2.91966	3.35825	3.27606	2.77652	3.24851	2.10356	4.18776	1.93535	2.76942	3.60132	2.87934	0.116282	-0.13025
ENSG00000134278	SPIRE1	1503	1690	2079	1674	1564	1495	1771	2083	2273	2366	1686	1519	1520	1435	1651	2005	1150	1696	1642	2109	6.87911	7.73153	8.32256	7.51882	6.65566	6.96558	7.24381	7.63575	10.814	8.50467	6.8898	7.07376	7.46887	6.7309	6.91473	9.73613	5.97354	7.48851	7.68491	8.71664	0.102424	-0.0999555
ENSG00000064726	BTBD1	8666	8953	12651	8675	10604	10460	11417	13869	10755	11616	11098	10527	9854	9016	11703	10342	7873	10302	9566	11741	66.9894	70.0002	86.573	66.1317	76.9024	82.5492	79.1716	87.2571	86.8835	70.2682	76.5528	83.5983	82.6599	70.9483	83.4136	85.4225	69.5501	77.7152	76.5297	82.134	0.968901	-0.00325414
ENSG00000072506	HSD17B10	1625	1403	1463	1344	1290	1130	1482	1806	1187	1972	1682	1281	1354	1468	1495	1314	1218	1489	1471	1514	43.2055	37.6516	34.4418	35.1347	32.2149	30.5929	35.3538	39.1484	33.0028	41.0115	39.879	35.067	38.9274	39.6326	36.7279	37.3635	36.9557	38.5273	40.3361	36.5414	0.540546	0.0478721
ENSG00000181135	ZNF707	246	148	198	158	114	94	228	191	247	237	177	168	135	158	141	224	154	172	230	185	2.92785	1.86183	2.49346	1.84017	1.48728	1.34364	2.40257	1.89837	3.15218	2.23385	1.91715	2.66634	1.687	1.83269	1.15197	3.46494	2.26662	2.25452	2.87018	1.99845	0.974739	-0.00451741
ENSG00000134186	PRPF38B	1095	1027	1250	1147	909	1017	1092	1338	1325	1694	1248	1208	1048	1122	1269	1232	803	1213	1129	1343	7.66538	7.41065	7.92521	7.99226	6.02771	7.32787	7.08696	7.84554	10.0434	9.4268	7.82814	8.75679	8.18954	8.29087	8.19242	9.47724	6.56198	8.41909	8.4266	8.52429	0.384238	0.0458033
ENSG00000134184	GSTM1	1	1	2066	1635	1651	1887	78	90	909	1683	138	100	0	1688	1517	1025	15	1957	1198	114	0.019163	0.016239	40.7089	35.4989	36.2173	44.0687	1.51565	1.59547	20.8426	28.9149	2.68739	2.24688	0	37.601	30.8038	24.1423	0.363738	44.1627	27.8616	2.24607	0.721091	-0.371294
ENSG00000037042	TUBG2	960	687	637	650	672	517	817	840	597	1006	793	845	723	1110	790	891	580	896	819	1112	13.8328	9.9911	8.12293	9.22866	9.09775	7.61639	10.5757	9.82906	9.00025	11.3329	10.2	12.5401	11.2967	16.2012	10.531	13.7246	9.54624	12.6003	12.2048	14.5079	0.00182397	0.282382
ENSG00000078487	ZCWPW1	208	161	157	172	124	127	192	159	135	207	208	190	157	170	210	166	133	143	175	259	2.36838	2.04186	1.60294	1.93317	1.46779	1.60973	1.98004	1.62787	1.55799	1.76385	2.22453	2.38168	1.94754	1.88094	2.22931	2.05544	1.74746	1.55023	2.07367	2.69428	0.0651786	0.207662
ENSG00000042753	AP2S1	1280	1235	1024	1068	943	926	1185	1193	892	1722	1263	1177	837	1483	1107	867	880	1442	1140	1337	35.1103	34.3162	25.0589	28.9518	24.7525	26.1824	29.0905	26.4767	25.7431	36.9628	31.0008	33.21	24.6636	41.9603	28.0518	25.1401	28.4213	38.6181	32.5014	33.2368	0.41505	0.0860091
ENSG00000105855	ITGB8	302	404	389	46	447	453	167	413	699	468	260	273	288	346	314	620	183	259	28	478	0.874176	1.18137	0.999219	0.331459	1.24092	1.34485	0.43361	0.994323	2.14642	1.0614	0.680513	0.814459	0.903203	1.0148	0.839884	1.93729	0.613928	0.760865	0.213446	1.25443	0.474062	-0.25744
ENSG00000105854	PON2	879	890	1021	982	959	943	870	1093	1171	1359	876	1026	869	1059	1145	976	769	852	1179	1240	13.238	13.1638	13.3655	14.519	13.9948	13.9106	11.5176	13.6706	18.6202	16.009	11.5079	15.3484	14.5255	15.8884	16.4525	15.9364	13.3729	12.3427	17.9292	17.4714	0.47304	0.0486373
ENSG00000111481	COPZ1	3529	3411	3051	2796	3058	2825	3309	3398	3033	4412	3697	3040	2793	3597	3316	2663	2673	3314	3243	3686	48.214	47.0644	36.3072	37.5131	43.1266	39.145	41.3491	37.252	43.1951	46.4556	44.2682	42.208	41.1276	49.3927	41.3259	38.3257	41.4433	44.9095	45.8641	45.2472	0.542816	0.0442825
ENSG00000105856	HBP1	2801	2428	3334	2619	3101	2890	3082	3332	3532	4039	2820	2920	3008	2971	2577	2887	2149	3290	3316	4087	25.3488	22.9166	27.2773	24.1203	27.1755	27.6659	25.6393	24.4768	33.6236	29.2702	22.8185	28.0716	29.4758	27.5309	22	27.9828	22.5877	29.2579	31.077	34.132	0.798075	0.0160677
ENSG00000105851	PIK3CG	54	74	34	78	71	74	53	41	100	68	29	33	35	65	33	69	35	88	38	81	0.253952	0.357759	0.141628	0.359803	0.314064	0.354337	0.223726	0.15419	0.490635	0.248196	0.120286	0.158662	0.182568	0.309536	0.143726	0.359119	0.190552	0.402909	0.184335	0.440958	0.174841	-0.329221
ENSG00000142252	GEMIN7	369	401	381	353	311	272	364	309	301	532	435	361	342	394	380	261	373	389	416	375	7.34958	8.35887	7.07235	5.83239	5.544	4.5494	5.13057	3.83697	5.27647	7.23819	7.339	6.28323	7.32133	7.40654	5.47886	4.72709	6.59675	7.45097	6.63481	6.72443	0.210652	0.148178
ENSG00000012174	MBTPS2	628	653	1066	844	730	711	914	1072	956	1092	826	805	724	612	798	802	569	758	794	1011	3.58739	3.77639	5.40883	4.76445	3.92393	4.16073	4.69992	4.98341	5.72802	4.89271	4.22459	4.74593	4.49143	3.54709	4.2238	4.90692	3.72351	4.23262	4.69901	5.24502	0.275364	-0.0931468
ENSG00000012171	SEMA3B	2283	1831	1858	1722	1609	1361	1095	1613	2061	2634	1699	2252	1159	2556	1764	2503	1043	2280	3512	3349	20.2719	16.648	14.7029	14.8873	13.2851	12.2947	8.9573	11.6119	18.9872	18.8761	13.5846	20.4019	11.6764	22.716	14.3042	23.5794	10.9181	19.8534	33.5094	28.1127	0.027808	0.331935
ENSG00000135587	SMPD2	137	86	74	128	87	73	111	131	97	153	85	80	83	113	95	78	75	133	109	132	2.38001	1.42397	1.12294	2.04983	1.38885	1.34989	1.68826	1.79757	1.69368	1.94816	1.17025	1.28684	1.51712	2.02358	1.57719	1.46138	1.36803	2.29866	1.88871	2.05483	0.688037	-0.0553954
ENSG00000071082	RPL31	12724	12059	7375	10970	9141	8229	11519	9349	8032	23767	9486	11326	8837	15543	8854	6523	11316	13958	10600	10903	216.697	214.235	114.55	179.378	157.817	146.467	172.174	126.317	144.618	316.824	147.21	192.973	170.125	258.998	143.739	125.093	211.021	224.115	189.817	171.848	0.806071	0.0428391
ENSG00000247315	ZCCHC3	927	759	863	703	864	863	898	953	952	1370	869	916	803	896	1006	1072	581	894	1114	1030	7.01073	5.79782	5.78038	5.24296	6.13655	6.67696	6.10055	5.85174	7.53535	8.10758	5.8752	7.14195	6.58503	6.86657	7.04019	8.67198	5.01975	6.60179	8.71624	7.05517	0.241957	0.0770573
ENSG00000139780	METTL21C	1276	1304	717	859	1122	964	462	476	903	1547	1422	1710	850	1119	1960	1131	714	1144	2078	1444	29.7468	30.7037	14.8204	19.7639	24.5867	22.9888	9.66555	9.01501	22.0365	28.2068	29.6204	41.0861	21.5067	26.4386	42.2956	28.1878	19.0208	26.0583	50.1417	30.4987	0.00930623	0.543917
ENSG00000180667	YOD1	447	444	477	360	455	497	405	578	566	619	410	394	426	465	464	706	306	475	385	563	1.80963	1.81418	1.70911	1.43875	1.72921	2.05628	1.47161	1.90004	2.39738	1.95923	1.4806	1.64089	1.87118	1.90847	1.73528	3.05773	1.41419	1.87572	1.61182	2.06447	0.899965	-0.0121014
ENSG00000188419	CHM	645	689	1056	687	770	739	632	921	990	918	627	727	805	641	694	888	700	711	727	908	3.11838	3.32069	4.42248	3.23809	3.43205	3.58374	2.6726	3.49374	4.91672	3.39514	2.64187	3.61158	4.11899	3.09974	3.05891	4.5089	3.79183	3.26489	3.61255	3.93616	0.765781	-0.0304405
ENSG00000135632	SMYD5	915	719	753	577	644	562	689	831	716	865	787	830	667	786	790	761	506	687	816	880	9.12061	7.12462	6.6325	5.6561	5.95861	5.62639	6.11097	6.65514	7.43426	6.64779	6.97492	8.37556	7.1877	7.89028	7.17321	8.03077	5.73975	6.60966	8.3075	7.92277	0.0810758	0.116939
ENSG00000135631	RAB11FIP5	1353	1088	1224	1201	1168	1124	1537	1634	1299	1728	1113	1156	980	1099	1097	1819	706	1352	1433	1723	7.30873	6.01941	5.95038	6.47132	6.10951	6.32658	7.61138	7.29213	7.61296	7.64709	5.49153	6.06401	5.58864	6.23477	5.3862	10.5513	4.42982	7.32331	7.6803	8.77767	0.608156	-0.0448248
ENSG00000135636	DYSF	1722	1730	2966	2369	2040	2036	1928	2983	2202	1822	2105	2064	2095	1219	2236	2741	1198	1729	1864	2852	6.55384	6.65198	9.94794	8.97425	7.36803	7.96388	6.5342	9.15502	8.81376	5.4582	7.04001	8.16206	8.64751	4.73756	7.87642	11.1731	5.19403	6.48012	7.26864	9.90586	0.626139	-0.0673302
ENSG00000135637	CCDC142	125	95	101	104	73	169	72	124	113	138	96	100	80	51	65	133	214	62	124	117	0.928106	0.753545	0.666745	0.762263	0.508749	1.75129	0.49899	0.744833	0.949112	0.921406	0.636836	0.765497	0.645055	0.382559	0.446518	1.05901	2.47858	0.448486	0.952026	0.783912	0.904268	0.0318237
ENSG00000147155	EBP	356	327	416	363	356	274	399	423	335	240	465	341	289	355	423	297	330	308	392	416	5.11386	4.74853	5.34588	5.24795	4.77839	4.02235	5.13228	4.90273	5.01303	6.65173	5.93326	5.01565	4.47327	5.13436	5.68575	4.59687	5.45235	4.41971	5.86243	5.38627	0.384886	0.116293
ENSG00000114503	NCBP2	2100	2019	2057	1877	1763	1796	2141	2547	2176	2850	2381	2129	1975	2210	2201	2080	1591	2131	2016	2603	26.1232	25.5862	22.012	22.4677	20.4453	21.4334	23.7641	24.9276	26.7924	27.0964	24.711	26.8515	25.2529	28.0313	24.8432	27.1085	21.2363	25.5763	23.9786	27.6803	0.0899289	0.0784374
ENSG00000115677	HDLBP	12116	10973	13172	10771	10369	8693	12434	14042	10787	15013	9264	10936	9701	11167	9328	11469	7966	11843	11952	13300	61.4895	56.1154	57.4451	56.3249	48.8246	43.2998	55.5922	55.1591	57.801	58.1566	42.5051	56.7934	52.5096	57.8028	44.1103	62.1102	45.5333	56.7986	61.0911	61.1509	0.17773	-0.072879
ENSG00000112531	QKI	7345	7786	10251	8254	8703	8696	7527	9840	10323	10022	7827	7997	9126	7327	9159	9712	5916	7542	7963	10338	26.5041	28.1201	33.1948	28.1425	30.4769	33.1319	22.9827	29.8781	38.645	26.8332	24.2712	28.3833	36.3373	26.9043	31.2726	36.7554	23.6163	25.2821	29.6397	32.7532	0.703988	-0.0302347
ENSG00000029364	SLC39A9	1265	1029	1266	1035	1260	1091	1215	1566	1514	1900	1116	1084	1111	1366	1166	1274	826	1324	1602	1685	6.5026	5.2125	5.78775	5.52137	6.33738	5.76952	5.6261	7.45969	8.24305	7.89623	5.10432	5.54984	6.38173	7.1275	5.46889	7.10737	4.80619	6.79898	8.74284	7.63396	0.917374	0.00708667
NewGene_429	NewGene_429	66	45	73	71	74	97	86	69	63	116	68	86	71	76	78	60	66	59	79	100	0.980644	0.544027	0.693907	0.876255	0.75392	1.1687	0.882903	0.625254	0.81715	1.20259	0.727491	1.03963	0.84451	0.871518	0.754578	0.770404	1.10329	0.781741	1.10902	1.03984	0.775594	0.0428185
ENSG00000142920	AZIN2	184	173	105	88	83	102	92	100	123	256	94	178	139	269	105	274	88	177	244	476	2.18564	2.21211	1.38134	1.01035	0.948121	1.32644	0.959075	0.940843	1.59036	2.50704	0.997616	2.17108	1.84435	3.21021	1.20044	3.41947	1.26321	2.00338	2.98079	5.31871	0.00500153	0.680696
ENSG00000164418	GRIK2	92	90	76	40	67	67	36	64	90	89	77	124	41	103	85	113	28	94	162	179	0.471115	0.464625	0.336593	0.215023	0.323575	0.35036	0.166742	0.273516	0.483007	0.355068	0.374019	0.668906	0.223344	0.544084	0.401922	0.625208	0.164633	0.469224	0.924068	0.835028	0.0275053	0.516432
ENSG00000164414	SLC35A1	840	981	683	699	736	683	719	739	891	1049	742	694	691	1078	780	869	613	886	753	1147	11.5541	13.5747	8.28765	9.4513	9.47046	9.56419	8.86426	8.23164	12.7766	11.3368	9.13657	9.79656	10.2663	14.9643	9.96603	12.7645	9.6029	11.8531	10.6684	14.2336	0.258788	0.103
ENSG00000100532	CGRRF1	502	596	475	444	492	510	563	583	496	913	474	534	436	643	513	426	522	606	485	579	6.38601	7.59625	5.3507	5.53129	5.70376	6.5208	6.43572	5.87159	6.50126	9.03395	5.21209	6.97927	6.14223	8.28878	6.30527	5.79274	7.56684	7.31972	6.32461	6.47797	0.981231	0.0025517
ENSG00000198937	CCDC167	230	256	221	239	252	148	276	289	209	482	217	155	167	257	178	133	196	219	158	224	9.3968	10.5929	8.02082	9.65186	9.67121	6.19509	10.1613	9.60192	8.94711	15.4278	7.91656	6.52287	7.42631	10.6559	6.72737	5.82398	9.18375	8.76297	6.69895	8.31063	0.0245798	-0.337606
ENSG00000077454	LRCH4	986	777	1021	992	791	662	898	1229	838	1088	930	903	764	791	872	1137	536	834	904	1065	11.8191	8.87408	10.627	11.3579	8.17545	7.81772	9.08447	11.2584	9.52253	10.1997	9.80869	10.5258	9.46611	9.95408	9.3406	14.4912	7.78281	9.03788	11.1573	11.0339	0.774667	-0.0219302
ENSG00000077458	FAM76B	484	513	566	516	469	471	442	608	612	756	602	526	440	621	444	530	390	517	578	721	3.18283	3.4349	3.34203	3.40881	2.92855	3.19211	2.70829	3.32664	4.29837	3.92677	3.57819	3.50115	3.13998	4.0869	2.7409	3.68784	2.88682	3.41903	3.96937	4.35052	0.403352	0.053444
ENSG00000169155	ZBTB43	637	617	915	806	756	757	795	981	775	579	676	727	841	544	801	955	468	752	828	826	2.74842	2.6707	3.45923	3.44527	3.02578	3.29728	3.04038	3.43392	3.46549	1.93838	2.63258	3.24744	3.90097	2.39118	3.20252	4.3971	2.28786	3.127	3.6613	3.20479	0.911028	0.0138238
ENSG00000021300	PLEKHB1	559	566	892	720	561	520	549	611	762	1029	460	575	403	671	441	580	337	529	585	1131	7.06482	7.22015	10.2612	8.96218	6.69534	6.73471	6.37558	6.23251	10.1139	10.1123	5.21103	7.53323	5.59526	8.63114	5.15099	7.86746	4.84781	6.6297	7.64753	12.7921	0.134169	-0.194881
ENSG00000100399	CHADL	153	119	129	163	147	97	109	244	175	277	115	170	96	177	148	187	97	195	260	184	1.52944	1.20028	1.14263	1.60471	1.37746	0.986322	1.24333	2.1116	1.82438	2.18246	1.05798	2.02478	1.03821	2.18069	1.36843	2.00083	1.10299	2.1541	2.6881	1.89706	0.537212	0.0972843
ENSG00000100393	EP300	1300	1254	1760	1563	1619	1502	1458	1946	1836	1309	1174	1149	1363	995	1341	1792	735	1227	1452	1843	3.43959	3.35259	4.1273	4.07982	4.02507	4.06593	3.46854	4.18302	5.08069	2.70897	2.77696	3.13371	3.91368	2.6687	3.28333	5.07128	2.22349	3.1713	3.97516	4.41826	0.0723687	-0.208511
ENSG00000100395	L3MBTL2	688	679	728	608	581	437	529	710	663	772	635	665	530	610	669	730	281	646	821	775	5.35223	5.29416	5.00202	4.62313	4.19541	3.45376	3.76524	4.54314	5.38152	4.71518	4.3663	5.35789	4.47878	4.83528	4.77775	6.05214	2.46517	4.88751	6.53156	5.48152	0.627813	0.0457719
ENSG00000196557	CACNA1H	352	460	502	498	526	496	349	667	382	229	381	501	467	160	487	635	209	364	363	467	1.0865	1.4485	1.54003	1.52731	1.68809	1.59246	0.970513	1.88778	1.49862	0.585403	1.04917	1.59295	1.56649	0.500778	1.39231	2.65272	0.743688	1.09779	1.54105	1.30952	0.598864	-0.113504
ENSG00000197208	SLC22A4	105	102	95	60	90	80	145	97	119	146	110	138	70	121	81	135	75	129	173	171	1.20763	1.18319	0.969451	0.676742	0.97045	0.935954	1.49922	0.901352	1.4318	1.31314	1.12817	1.63761	0.867164	1.40969	0.856501	1.66434	0.986369	1.44139	2.05514	1.7825	0.0734215	0.268047
ENSG00000151292	CSNK1G3	616	626	760	612	632	551	628	669	872	985	620	637	593	739	652	643	421	649	789	929	3.85979	4.42586	3.97715	3.76695	3.51135	3.86452	3.2421	3.20321	5.67033	4.98728	3.64269	4.29665	3.84758	4.22935	3.86851	4.27553	3.05374	3.83957	4.83482	5.00861	0.892327	0.00927898
ENSG00000113141	IK	2615	2353	2578	2217	2154	2107	2224	2547	2131	3148	2303	2216	2038	2641	2215	2334	1625	2371	2384	2872	33.9188	31.0318	29.6262	28.4465	26.3099	28.072	26.2364	27.1807	29.054	32.1284	26.6369	29.7565	28.8042	34.9078	26.7791	32.5194	24.3007	30.1468	32.04	33.7456	0.969452	0.00179197
ENSG00000105552	BCAT2	2064	1747	2639	2245	2272	2228	2122	2669	1811	2351	2938	2053	1987	1725	2115	1933	1635	1877	2408	2309	33.491	29.1018	36.7248	35.6184	34.3946	37.3932	31.0193	35.4662	31.2541	30.1739	42.6846	34.4998	35.081	28.1838	32.1148	33.7186	30.907	30.2576	40.9428	33.8401	0.927945	-0.00951969
ENSG00000026652	AGPAT4	458	283	277	249	224	201	261	257	339	478	235	254	204	421	234	410	153	324	317	326	1.50271	0.955136	0.791852	0.788933	0.679944	0.70493	0.797235	0.69035	1.18361	1.22573	0.673572	0.899207	0.736595	1.48548	0.71951	1.44557	0.587338	1.02631	1.09571	1.03926	0.962802	-0.00677794
NewGene_5882	NewGene_5882	56	35	56	36	35	26	24	41	55	45	38	55	14	39	42	34	35	44	49	57	1.12387	0.704545	0.994932	0.703438	0.76062	0.519741	0.425827	0.656949	1.15922	0.699656	0.673668	1.14309	0.294887	0.790003	0.779192	0.725934	0.796448	0.848343	1.00578	1.02677	0.756705	0.0622004
ENSG00000185158	LRRC37B	201	127	120	126	156	114	126	148	177	194	88	115	114	153	94	147	99	132	151	183	2.20752	1.50489	1.08091	1.89061	1.70117	1.44313	1.63064	1.57422	2.50835	1.72948	0.967998	1.76676	1.50168	1.92176	1.00545	1.62335	1.37211	1.53319	1.70194	2.3412	0.201377	-0.156498
ENSG00000106635	BCL7B	1578	1453	1671	1468	1393	1241	1672	1650	1406	2039	1608	1437	1408	1490	1586	1319	1018	1538	1556	1931	21.0197	19.4971	19.8895	19.1245	17.4748	17.2527	19.8609	18.0907	19.2811	21.7755	18.6677	19.5962	20.6599	20.329	19.6921	19.3616	15.3259	21.0771	21.6621	23.1186	0.918364	0.0059255
ENSG00000106636	YKT6	1849	1473	2011	1756	1580	1575	1708	2067	1788	2714	1690	1475	1540	1665	1647	1855	1270	1659	1932	2149	18.203	14.6116	17.4868	17.1852	14.4776	15.9179	15.6568	16.3364	18.6679	20.7031	14.6171	14.9544	16.324	16.4974	14.9303	19.4448	14.1522	15.8426	19.6151	19.0567	0.26797	-0.0551142
ENSG00000106638	TBL2	549	468	464	401	439	425	456	516	500	840	456	523	362	554	439	554	418	507	555	640	3.29258	2.95625	2.4835	2.42344	2.32635	2.45082	2.62845	3.21572	3.06121	4.69823	3.20809	4.02289	2.26683	3.42319	2.41901	3.5086	2.85398	3.29097	3.89051	3.58561	0.37939	0.0685208
NewGene_9303	NewGene_9303	432	418	453	433	284	329	274	412	560	546	412	509	325	424	509	497	322	402	509	461	1.18606	1.1587	1.10276	1.17322	0.731621	0.923829	0.675932	0.918543	1.61085	1.17305	1.01014	1.44016	0.968517	1.18106	1.29281	1.4595	1.01129	1.07782	1.44788	1.14645	0.144199	0.155656
ENSG00000143643	TTC13	475	389	524	442	438	480	433	575	589	574	535	529	523	400	489	505	349	500	549	718	3.75584	3.1149	3.67511	3.4553	3.26752	3.93139	3.11257	3.6994	4.95311	3.61025	3.7626	4.34276	4.52682	3.22451	3.56803	4.31933	3.20628	3.99518	4.54232	5.17769	0.131839	0.117911
ENSG00000124588	NQO2	793	800	911	893	1079	792	1519	1494	487	781	340	646	1510	881	928	618	689	1164	1068	1260	6.40582	5.30389	8.32846	8.2416	9.2109	5.97414	12.4097	10.5528	4.99186	7.79524	2.49924	5.26914	9.87511	10.6409	9.70243	6.34919	6.45455	13.6098	10.802	9.4632	0.999772	6.64177e-05
ENSG00000143641	GALNT2	2176	2037	2619	2168	2370	1900	1964	2572	2521	2351	2160	1952	1981	1854	2188	2636	1427	1943	2398	2365	12.393	11.7218	13.2211	12.1828	12.6837	11.0681	10.0564	11.8975	15.024	10.4748	10.9959	11.4615	12.2438	10.704	11.5307	16.0545	9.2979	10.8087	14.1358	12.2027	0.434289	-0.0554977
ENSG00000167333	TRIM68	423	308	451	359	407	300	398	404	383	407	192	248	273	304	296	334	281	326	344	345	3.21498	2.40339	3.07154	2.68106	2.88852	2.3169	2.70644	2.48362	3.05213	2.40875	1.29492	1.94644	2.29054	2.32146	2.0847	2.71723	2.44491	2.40967	2.70188	2.3607	0.00356408	-0.309216
ENSG00000009830	POMT2	768	604	757	665	611	541	664	881	672	779	661	584	706	608	797	1072	393	613	768	974	4.47815	3.51296	4.03781	3.68403	3.29696	2.98062	3.38611	3.91858	4.04986	3.31534	3.64822	3.53052	4.13951	3.4545	4.15473	6.30845	2.58615	3.25732	4.5283	4.97825	0.302077	0.103314
ENSG00000146555	SDK1	336	172	169	125	149	142	204	258	387	493	106	190	112	359	107	355	64	203	226	243	0.819373	0.423071	0.363617	0.301002	0.339564	0.353158	0.446743	0.509537	0.987877	0.94072	0.230569	0.48564	0.294257	0.897494	0.240683	0.927917	0.17773	0.483012	0.580519	0.535473	0.360342	-0.235443
ENSG00000178927	CYBC1	934	623	767	679	630	567	782	883	804	1116	712	629	581	838	668	814	447	746	774	876	12.918	8.47433	8.52527	9.3652	7.60628	7.43639	9.32945	9.41555	10.7943	11.8363	7.70915	8.53136	8.16253	11.1205	7.97516	11.6468	6.49307	9.6857	10.1345	10.4632	0.357853	-0.0625598
ENSG00000178921	PFAS	297	272	442	339	312	294	325	495	326	351	256	350	288	217	262	352	197	252	387	343	1.42918	1.52758	1.85444	1.78526	1.53014	1.66336	1.54876	2.22558	1.67438	1.48208	1.25517	1.77721	1.73564	1.10958	1.18021	2.11758	1.47379	1.25129	2.17593	1.86064	0.106285	-0.183102
ENSG00000178922	HYI	116	83	49	72	87	72	103	78	60	264	83	108	54	128	61	248	67	65	66	127	3.07292	2.01552	1.09477	1.85801	2.06205	1.85625	2.24603	1.69287	1.51609	5.59653	1.86479	2.74984	1.44519	3.31988	1.41447	7.46669	2.02611	1.67658	1.93761	2.85742	0.651309	0.122436
ENSG00000168310	IRF2	932	662	896	894	806	841	1107	1193	1113	1114	810	603	714	683	662	867	579	738	671	904	10.3082	7.42802	8.83554	9.75217	8.3568	9.57854	11.1522	10.7503	13.0507	9.66273	8.00857	6.8509	8.58171	7.67672	6.73937	10.3045	7.33655	7.92578	7.71199	9.01181	0.000111464	-0.326175
ENSG00000114268	PFKFB4	123	130	157	139	112	123	131	114	142	152	121	65	99	110	96	107	96	108	116	204	0.869709	0.938148	1.01035	0.998091	0.742161	0.887427	0.830965	0.69784	1.13034	0.867745	0.759308	0.472648	0.792346	0.784184	0.687584	0.916191	0.772301	0.861078	0.845651	1.37556	0.173721	-0.182903
ENSG00000040487	PQLC2	282	278	353	301	165	218	311	394	329	408	371	287	171	266	351	351	181	303	309	383	3.96529	3.67039	4.34165	4.0235	2.18898	3.20826	4.00186	4.30495	4.78574	4.83113	4.29412	4.0896	2.62647	4.23094	4.54644	4.87114	2.98956	4.36264	4.35118	4.94713	0.745961	0.0391372
ENSG00000153107	ANAPC1	582	739	711	707	775	728	645	885	789	832	520	667	692	583	731	901	539	690	822	917	1.78606	2.29183	1.93343	2.1481	2.26131	2.28585	1.7789	2.24113	2.53443	1.99584	1.42628	2.10847	2.30349	1.81145	2.07576	2.95603	1.89629	2.06937	2.61255	2.65442	0.956728	-0.00504294
NewGene_9513	NewGene_9513	78	52	53	54	45	29	70	34	78	106	68	76	39	35	46	84	68	50	71	33	0.949976	0.578322	0.439079	0.581115	0.399053	0.328255	0.646556	0.296327	0.80225	0.828376	0.657548	0.845624	0.538367	0.405026	0.355535	0.943931	0.758365	0.502455	0.787215	0.35113	0.840341	0.0476533
ENSG00000198721	ECI2	3315	3443	3312	3129	3337	3247	3494	3858	3088	4187	3385	3009	3152	3337	3412	2894	2740	3612	2994	3647	60.7461	63.2303	53.3547	56.0572	56.8209	60.0438	57.1131	56.9845	58.6074	58.9957	54.9447	56.389	61.9956	61.4127	57.2725	56.0902	56.8214	63.5827	56.3399	59.9336	0.789261	-0.0189567
ENSG00000143756	FBXO28	984	984	1367	1115	1293	1182	1090	1371	1430	1626	1094	1314	1051	1107	1285	1074	789	1173	1270	1563	4.57895	4.62432	5.70485	5.11947	5.65285	5.62401	4.55926	5.18235	6.96316	5.91991	4.54743	6.30168	5.30684	5.22295	5.5309	5.36467	4.19598	5.35243	6.11338	6.59075	0.805076	-0.0183289
ENSG00000167807	AC011511.1	92	88	56	38	16	10	60	14	67	32	13	95	21	29	97	117	89	26	50	14	1.18667	1.14616	0.635095	0.485745	0.187782	0.124152	0.698871	0.146076	0.907191	0.319322	0.146287	1.26174	0.287818	0.377649	1.16226	1.61531	1.31713	0.32866	0.665966	0.160171	0.479242	0.332529
ENSG00000167005	NUDT21	2495	2566	2746	2289	2866	2769	2835	3110	2988	3710	2595	2731	2454	2738	2428	2465	1988	2554	2825	3138	14.2726	14.8278	13.9207	12.9195	15.4015	16.1979	14.5768	14.4454	17.883	16.5985	13.2621	16.1004	15.2304	15.8755	12.8513	15.0731	13.0031	14.2653	16.7207	16.2571	0.296733	-0.0576185
ENSG00000143751	SDE2	617	682	736	629	918	689	676	761	1009	921	821	677	635	628	682	809	464	706	757	896	3.93716	4.39645	4.16408	3.95974	5.50604	4.49506	3.87332	3.94301	6.73639	4.59627	4.6793	4.45413	4.39364	4.06247	4.02488	5.51814	3.38645	4.3964	4.99825	5.17933	0.565694	-0.0502521
ENSG00000127774	EMC6	1590	1893	1700	1843	1433	1527	2119	1792	1518	2909	2157	1658	1554	1793	1643	1384	1833	1932	1441	1909	59.8855	70.8185	56.4476	68.2219	50.3661	58.7865	71.8056	54.0077	59.5968	84.5519	72.1332	64.2783	63.5632	68.6257	56.6512	55.0681	78.4072	70.4868	55.7417	64.8491	0.860764	0.020856
ENSG00000233927	RPS28	1977	2000	4035	5842	3195	2855	4298	3122	3756	13346	3833	3553	3117	9182	1368	3126	4286	5073	3946	3348	37.8267	38.6627	68.4301	110.311	57.4487	55.8775	73.9188	48.5136	75.2074	199.773	65.549	70.0605	64.7246	178.096	24.2227	63.9567	93.7953	94.8091	78.1392	58.0249	0.903259	0.0347749
ENSG00000122729	ACO1	1534	1489	2283	1714	1895	1719	1670	2153	2064	1912	1780	1766	1656	1522	1555	1935	1077	1542	1572	1634	5.21205	5.11835	12.4333	8.55262	6.60007	10.0919	8.3601	9.42794	9.12868	7.86815	9.05707	10.4819	8.36248	5.32373	5.83673	11.4412	7.12003	8.12978	5.53955	5.03006	0.116269	-0.133122
ENSG00000165406	2024-03-08	904	784	1017	779	792	723	886	941	892	1123	792	758	724	869	801	1143	533	981	1146	1026	4.41906	3.86811	4.39434	3.75437	3.68114	3.58898	3.98664	3.79319	4.59085	4.29021	3.43777	3.88534	3.8197	4.38652	3.55851	6.03814	2.98936	4.75099	5.90534	4.57055	0.481303	0.0495816
ENSG00000165409	TSHR	172	204	204	204	625	511	207	315	245	233	142	218	192	252	226	212	155	214	269	216	0.999602	1.1389	1.03261	1.22619	3.46916	2.96636	1.0562	1.55939	1.51641	1.1134	0.701963	1.2646	1.2299	1.41912	1.20778	1.30619	1.00374	1.22752	1.64453	1.16118	0.0593353	-0.455458
ENSG00000241258	CRCP	1006	828	896	890	829	633	949	958	895	968	811	843	866	763	807	845	596	907	944	1164	8.64721	7.26674	6.74296	7.44726	6.46683	5.45275	7.21812	6.50165	8.11786	6.41799	6.0595	7.27611	7.97628	6.62898	6.24748	7.78042	5.73254	7.40867	8.25668	8.96405	0.85819	0.0125276
ENSG00000164715	LMTK2	978	896	1214	1123	1041	895	888	1445	1328	1147	1247	1028	1077	769	1149	1610	544	813	1074	1339	2.77206	2.56496	3.05138	3.14059	2.77271	2.59542	2.26185	3.32851	3.93848	2.54306	3.15921	3.0032	3.31384	2.20965	3.01523	4.88188	1.76311	2.25087	3.15088	3.43893	0.899398	0.0153697
ENSG00000066422	ZBTB11	864	991	1090	933	1000	857	858	1138	1176	1244	1006	919	947	943	953	1095	684	1110	1046	1264	3.65288	4.26068	4.15035	3.90399	3.96109	3.69148	3.30775	3.90714	5.20918	4.12718	3.84779	4.00949	4.36105	4.02682	3.71601	4.94785	3.30399	4.58033	4.58342	4.85388	0.450547	0.0410598
ENSG00000100147	CCDC134	46	55	63	55	75	45	78	114	72	61	56	43	69	58	64	64	48	88	94	38	0.981013	1.30922	1.2658	1.16765	1.5047	1.01176	1.64421	1.97882	1.59041	1.0264	1.13605	1.10605	1.60721	1.27589	1.26848	1.52408	1.16073	1.81932	2.23193	0.873277	0.969423	-0.00752649
ENSG00000240849	TMEM189	802	795	1098	1034	978	886	886	1033	844	893	970	854	836	848	891	827	580	798	752	926	3.20806	3.63405	5.3828	4.11358	4.60473	6.33766	4.87657	3.55164	5.40991	2.44672	5.38912	3.89949	4.19679	5.5381	5.87293	3.56173	3.25405	4.65125	3.13038	3.86925	0.284932	-0.099074
ENSG00000158683	PKD1L1	145	179	560	428	482	463	270	432	545	296	254	230	381	166	298	367	283	148	255	214	0.503436	0.507313	1.51005	1.25047	1.37237	1.33102	0.722779	1.32833	1.61594	0.671472	0.662465	0.792692	1.39843	0.604866	0.862651	1.18853	1.04696	0.503463	0.806081	0.587969	0.070807	-0.458404
ENSG00000008056	SYN1	145	91	136	152	128	139	111	143	126	217	137	158	125	139	184	118	98	170	138	262	1.13308	0.720248	0.949838	1.1891	0.92896	1.10092	0.77967	0.921429	1.08954	1.34546	0.95733	1.41365	1.07103	1.09703	1.31835	0.998919	0.876008	1.2972	1.12149	1.93173	0.119701	0.203904
ENSG00000130518	IQCN	101	77	68	54	31	27	19	37	72	97	61	77	24	58	52	59	34	75	83	90	0.656465	0.498088	0.501456	0.306472	0.183392	0.232149	0.096551	0.173141	0.428972	0.458366	0.343988	0.455695	0.14956	0.379637	0.27232	0.404373	0.337138	0.466058	0.554371	0.467052	0.604408	0.136444
ENSG00000159377	PSMB4	4323	3876	4442	3948	3985	3772	4406	4385	4275	6995	4688	4173	3763	4842	4108	3421	3310	4135	3828	4501	113.787	103.066	103.613	102.533	98.5487	101.525	104.245	93.744	117.743	144.018	110.276	113.206	107.478	129.188	100.041	96.2943	99.6454	106.287	104.245	107.312	0.6717	-0.0318476
ENSG00000130511	SSBP4	1680	1487	1496	1534	1234	1087	1646	2036	1484	3753	1842	1266	1129	1899	1494	1786	951	1762	2185	1859	27.4139	25.0586	21.0043	25.2835	19.5135	17.9536	25.1824	26.9164	25.4562	49.5129	28.0933	21.4448	20.0575	31.8561	22.9025	31.5619	18.2663	28.2656	36.6681	27.2996	0.928496	-0.0116453
ENSG00000130517	PGPEP1	1142	921	992	915	845	714	922	1216	969	1407	934	877	836	1025	658	1195	836	946	1347	1435	4.2081	3.32506	3.1545	3.75943	2.84754	2.63062	2.95822	3.52622	3.65796	3.94289	2.98706	3.2323	3.29613	3.72935	2.22988	4.57158	3.55141	3.4414	5.14046	4.66512	0.386115	0.0819501
ENSG00000164758	MED30	340	356	210	280	303	335	409	344	318	730	235	291	263	464	284	237	254	373	373	402	8.75216	9.24283	4.77479	7.10966	7.32876	8.80861	9.50043	7.19288	8.56832	14.6834	5.40605	7.71708	7.33457	12.108	6.74852	6.51893	7.46158	9.37157	9.94108	9.37422	0.521533	-0.0990468
NewGene_3844	NewGene_3844	674	600	500	368	426	333	451	552	527	716	590	505	428	417	548	487	281	615	587	482	7.30363	6.52024	4.66983	3.92015	4.29655	3.60479	4.23857	6.04254	6.0422	6.05804	5.59268	5.6337	4.94721	4.49996	6.59506	5.67339	3.44015	6.51201	6.88375	4.56182	0.875263	0.0180836
ENSG00000164754	RAD21	4818	5366	6750	5680	5974	5840	5035	6326	5643	6441	5687	5547	5246	5505	5946	5595	4138	5450	5969	6804	32.9418	36.9844	41.3101	38.2209	38.142	40.6187	30.954	35.0021	40.2362	34.3043	34.5483	39.0195	38.9344	38.1473	37.6989	40.8104	32.3515	36.2391	42.085	41.9471	0.858611	0.0119751
ENSG00000164751	PEX2	1388	1262	1421	1205	1413	1191	1277	1490	1588	2539	1307	1430	1176	1477	1024	1272	1225	1462	1229	1619	12.9377	10.8594	13.2457	11.7251	13.4227	12.606	9.76306	14.2767	17.5849	19.9147	11.657	11.4734	14.4717	14.9493	9.93186	12.3902	13.5434	11.7551	10.4761	14.1995	0.491851	-0.0607692
ENSG00000155508	CNOT8	1336	1283	1454	1274	1423	1394	1395	1505	1299	2037	1371	1341	1175	1620	1388	1383	934	1446	1416	1748	13.7866	13.3477	12.8754	12.2257	13.3227	14.3486	12.2961	11.8864	13.4266	16.0605	11.79	13.4366	13.1543	15.9718	14.1747	14.7077	10.8791	13.8288	14.8501	15.9854	0.893495	0.00737899
ENSG00000159082	SYNJ1	692	739	906	656	795	679	786	1136	993	1057	724	732	681	607	771	943	572	716	867	1030	2.52717	2.67841	2.94877	2.35629	2.72031	2.5276	2.574	3.375	3.77789	3.02356	2.30978	2.74291	2.69016	2.21679	2.57911	3.68211	2.34571	2.54007	3.28403	3.40247	0.383156	-0.0679353
ENSG00000155506	LARP1	2279	2116	2916	2471	2173	1941	2142	3385	2715	2676	2364	2208	2269	1752	2365	2922	1345	2120	2582	3040	8.96019	8.46971	10.1329	9.66861	7.98635	7.70448	7.60407	11.0483	11.3536	8.14436	8.31026	9.20324	9.85575	7.05851	8.63664	12.6517	6.03098	8.13265	10.6136	10.8714	0.572202	-0.0496862
ENSG00000159086	PAXBP1	940	963	1004	772	725	713	670	944	952	1052	1188	1056	879	961	969	949	746	891	1139	1117	6.21666	6.45188	6.26952	5.00104	4.72783	5.06117	4.00972	5.38522	7.02349	5.55826	6.93398	7.63774	6.54719	6.84235	6.03278	6.91722	5.95475	5.75195	8.27308	6.96387	0.000820862	0.254857
ENSG00000011478	QPCTL	79	64	73	63	68	48	32	143	85	106	72	70	73	76	86	73	46	75	103	79	0.863583	0.78154	0.708017	0.730409	0.70053	0.550429	0.303338	1.29545	0.975773	0.91394	0.699829	0.783919	0.869482	0.83943	0.868536	0.874461	0.634604	0.867582	1.15879	0.796913	0.647582	0.0784695
ENSG00000010704	HFE	369	248	98	153	185	167	244	250	332	399	54	228	119	307	125	266	187	266	281	292	1.88506	1.22058	0.418514	1.07442	0.860579	0.81712	1.78115	0.985354	1.66949	1.53269	0.627088	1.21679	0.612622	1.59202	0.815484	1.3616	1.08417	1.39721	1.54454	1.38304	0.628112	-0.122683
ENSG00000196616	ADH1B	12904	10800	6540	7051	11180	9851	13508	11338	6499	13406	5049	10662	5766	13914	4101	6425	12335	11550	10835	6106	80.9259	69.6278	37.3547	43.8569	66.4625	63.1465	78.4032	57.7917	43.3106	71.8518	28.3047	68.7134	39.3787	90.785	23.747	45.1887	90.6358	70.9817	70.8906	34.6115	0.54342	-0.141973
ENSG00000125046	SSUH2	36	44	49	63	41	34	51	65	36	31	57	49	52	29	57	24	30	52	19	61	0.42678	0.619879	0.543784	0.773915	0.478775	0.386012	0.659907	0.722836	0.466157	0.243647	0.702156	0.669649	0.633825	0.382806	0.762379	0.394368	0.357844	0.47858	0.237215	0.575507	0.993377	-0.00197997
ENSG00000081913	PHLPP1	432	319	503	421	421	413	278	550	428	435	363	461	349	324	319	407	186	351	377	580	1.71405	1.27625	1.76964	1.64827	1.56876	1.67472	0.992175	1.77231	1.77792	1.35045	1.28679	1.88605	1.50233	1.30284	1.17101	1.72478	0.842832	1.35789	1.5468	2.08359	0.27331	-0.130727
ENSG00000005471	ABCB4	101	97	96	60	58	64	85	111	166	175	71	160	53	164	41	180	50	198	170	154	0.616447	0.714374	0.507968	0.354007	0.329988	0.385531	0.458104	0.575208	1.08268	0.857245	0.386658	1.01774	0.342303	1.09752	0.230913	1.23339	0.335589	1.21308	1.09144	0.854696	0.164839	0.357326
ENSG00000037280	FLT4	243	241	640	673	477	423	313	400	547	372	446	312	442	229	400	508	239	304	336	564	1.06608	1.0817	2.55052	2.99477	1.99546	1.92216	1.23138	1.41552	2.52243	1.28301	1.7632	1.42978	2.16131	1.01504	1.68417	2.44866	1.22333	1.31681	1.52163	2.26193	0.450746	-0.152254
ENSG00000160124	CCDC58	227	298	155	213	204	228	262	180	182	314	257	181	226	236	239	130	219	315	157	214	8.31794	10.9654	4.93197	7.48562	6.94326	8.52933	8.6396	5.26558	6.79767	9.05124	9.04645	6.90073	8.96939	8.92575	8.06543	4.89301	9.04131	11.3158	5.78632	7.12828	0.86601	0.0300695
ENSG00000231389	HLA-DPA1	3494	3487	2937	2692	3154	2404	2091	2324	3284	4649	1820	2227	706	2883	1701	2259	1984	3248	1365	5501	52.4591	53.058	38.9391	39.9114	44.5745	37.5067	28.3028	28.2972	51.4491	54.2612	24.7414	34.5867	11.4497	43.9281	23.6565	36.2884	33.8577	47.6157	21.1117	74.9928	0.13136	-0.324596
ENSG00000176928	GCNT4	70	61	84	62	72	78	108	99	123	165	87	106	72	60	54	38	44	94	59	98	0.318572	0.278077	0.339614	0.276806	0.306245	0.361299	0.442365	0.36379	0.586929	0.586861	0.353577	0.494501	0.356078	0.27633	0.228293	0.182797	0.225754	0.417973	0.276579	0.402681	0.1396	-0.278267
ENSG00000181026	AEN	214	151	189	173	191	152	171	212	290	346	206	175	143	184	139	230	115	181	167	198	1.73637	1.23513	1.3618	1.38681	1.45855	1.26413	1.25066	1.39866	2.48261	2.22936	1.49329	1.46645	1.26324	1.51443	1.04257	2.01295	1.06356	1.43747	1.40287	1.45563	0.0989049	-0.180959
ENSG00000198169	ZNF251	754	575	785	602	540	553	701	867	760	836	742	720	646	577	688	643	550	607	778	796	6.84156	5.25077	6.32217	5.36242	4.58252	5.14315	5.80085	6.36302	7.29951	5.953	5.98807	6.82895	6.3943	5.32092	5.85995	6.30603	5.70877	5.40055	7.53078	6.59066	0.62252	0.0364416
ENSG00000198168	SVIP	583	559	511	514	565	593	725	839	819	946	576	640	482	791	594	703	551	728	641	619	3.25667	3.15212	2.52675	2.83006	2.96212	3.38685	3.63823	3.80472	4.78527	4.1308	2.87648	3.68569	2.92266	4.47694	3.06784	4.19522	3.52172	3.96807	3.70175	3.13308	0.857945	0.0173711
ENSG00000198162	MAN1A2	1135	1195	1721	1303	1334	1255	1570	1905	1928	1951	1228	1350	1216	1577	1392	1734	974	1401	1567	1929	3.35364	3.56925	4.57769	3.82766	3.70813	3.81362	4.18948	4.62301	6.05533	4.51347	3.27445	4.11678	3.96907	4.7659	3.81708	5.50958	3.29251	4.16304	4.79424	5.26267	0.790947	-0.0202374
ENSG00000198160	MIER1	1432	1226	1337	1118	1281	1225	1198	1373	1552	2018	1365	1331	1044	1406	1095	1311	936	1441	1495	1728	7.67529	6.64184	6.30612	6.01252	6.46826	6.63377	5.61007	5.99585	8.86241	8.33051	6.43302	7.21696	5.93582	7.64331	5.48036	7.48796	5.68768	7.40386	8.23375	8.8684	0.922377	0.005832
ENSG00000171045	TSNARE1	253	183	190	193	187	212	160	199	147	270	237	243	182	215	148	219	126	183	276	224	3.0822	2.22822	2.03305	2.30962	2.13435	2.63341	1.73923	1.96368	1.87708	2.57645	2.55485	3.0411	2.40584	2.64115	1.65204	2.85417	1.7343	2.15593	3.46964	2.47075	0.39671	0.101381
ENSG00000175745	NR2F1	94	92	57	34	44	71	25	49	94	160	20	64	29	125	74	125	46	87	174	87	0.627786	0.620461	0.333671	0.221423	0.275144	0.474999	0.148596	0.262322	0.651469	0.834341	0.117218	0.440243	0.199957	0.843072	0.452998	0.889312	0.341309	0.561728	1.19244	0.516624	0.395548	0.276863
ENSG00000179673	RPRML	55	47	21	46	56	50	63	87	28	51	92	66	48	14	59	34	25	46	56	73	1.26247	1.08796	0.417987	1.03194	1.2125	1.16648	1.29623	1.63449	0.662541	0.923879	1.89254	1.56043	1.18571	0.324765	1.26389	0.841147	0.661029	1.03398	1.32508	1.51635	0.784561	0.0764003
ENSG00000147316	MCPH1	645	576	608	570	549	472	551	569	618	656	457	513	630	522	491	536	356	526	519	706	2.63415	2.344	2.27727	2.53852	2.14021	1.97953	2.04716	2.27753	2.72031	2.13681	1.60718	2.27462	2.68382	2.13197	1.99545	2.40043	1.60121	2.3506	2.30581	2.62004	0.30329	-0.0811006
ENSG00000145220	LYAR	386	260	291	316	270	227	273	281	301	496	273	229	267	368	229	324	195	318	366	400	6.24274	4.24569	4.16079	5.03079	4.09039	3.7523	3.96563	3.68033	5.08893	6.26536	3.94146	3.80744	4.68138	6.05609	3.41989	5.6018	3.63812	5.01132	6.11259	5.85592	0.938879	0.00797498
ENSG00000167476	JSRP1	2226	2281	3453	3364	2246	2126	2513	3240	2402	3135	3452	2646	2577	2198	2898	2971	2147	2668	2458	3687	49.6267	51.3714	68.2405	73.9983	47.0448	48.4807	50.3687	58.6762	56.0342	54.681	68.7902	60.7979	62.3515	49.6766	59.79	70.822	54.7457	58.0927	56.7045	74.4593	0.278198	0.109782
ENSG00000167470	MIDN	1199	1274	1606	1711	1391	1185	1456	2315	1560	1587	1498	1595	1260	904	1504	1776	907	1319	1773	1469	8.78258	9.12846	10.245	12.1832	9.38183	8.41412	9.93601	13.4813	11.7342	8.83124	9.60561	11.8811	10.0523	6.35954	10.1829	14.2013	7.48215	9.47061	13.1576	9.90022	0.618295	-0.0575839
NewGene_7658	NewGene_7658	83	88	60	80	51	78	110	82	81	132	59	72	51	64	75	54	41	50	82	93	2.15528	2.32363	1.38467	2.07032	1.24717	2.09126	2.5802	1.73772	2.21078	2.70825	1.3646	1.93543	1.43092	1.68727	1.80713	1.51037	1.21865	1.26314	2.22626	2.2059	0.0257772	-0.331125
ENSG00000069998	HDHD5	2177	2070	3151	2376	2367	2201	2800	3330	2333	2737	3028	2292	2397	2211	2711	2364	2031	2230	2208	2357	30.7075	29.4702	39.3788	33.0622	31.3593	31.7301	35.4851	38.1445	34.4148	30.1907	38.1612	33.302	36.6752	31.5961	35.3687	35.6387	32.7639	30.7167	32.2548	30.1079	0.885818	-0.0141645
ENSG00000084754	HADHA	11621	11351	17537	13708	12561	12294	13447	17330	13025	14418	12919	11590	13002	12750	15487	14176	9841	11888	13392	13687	103.756	101.61	134.579	113.892	99.528	110.531	101.699	120.95	118.617	96.7685	97.2496	100.716	120.207	112.038	125.538	128.9	95.8824	99.4633	118.561	105.622	0.829425	-0.0180303
ENSG00000240065	PSMB9	518	340	457	474	457	428	441	497	786	1102	410	302	386	579	464	558	365	317	454	654	16.8216	11.1276	13.1359	15.1247	13.9218	14.1908	12.8696	13.1098	26.7249	28.0565	11.8637	10.1112	13.6141	19.0223	13.9146	19.3785	13.6015	10.0607	15.2395	19.2693	0.195585	-0.193511
ENSG00000095637	SORBS1	6821	6300	8313	6368	5917	5401	6943	9732	8419	7349	6471	6662	7036	4510	7968	7716	4090	5740	6280	7656	32.1674	27.5024	28.6333	26.6272	20.5005	22.8133	24.4445	31.6089	34.8505	21.6249	24.22	28.8234	29.0719	17.189	26.8241	32.4601	19.5858	24.2101	28.2596	29.1724	0.410099	-0.0839505
ENSG00000034713	GABARAPL2	6083	5541	5115	4910	5181	4970	5763	5729	5297	9395	6162	5485	4946	7041	5709	4984	4295	6855	5437	6751	154.66	142.115	115.313	123.314	123.716	129.122	131.8	117.869	140.631	186.623	140.189	143.982	136.776	180.964	134.059	135.514	124.942	170.188	142.651	155.29	0.340507	0.0756179
ENSG00000148225	WDR31	235	157	228	124	110	96	156	236	172	216	233	292	105	173	271	233	100	195	169	193	1.50934	0.823957	1.04659	0.634257	0.534889	0.519044	0.728487	1.0617	0.932002	0.874775	1.07966	1.5609	0.591614	0.91235	1.30287	1.32311	0.589525	0.989999	0.906863	0.906854	0.136612	0.261587
ENSG00000133134	BEX2	1164	1186	1115	1137	985	968	1355	1553	1304	2183	1947	1286	1177	1236	1549	1051	1109	1823	1358	1550	33.7707	35.099	27.934	39.0802	27.1631	28.9455	35.9154	36.9494	41.5129	50.7108	51.8694	38.5343	37.1632	36.4169	41.3951	32.6956	36.1095	51.4461	40.8976	40.8427	0.0502451	0.222537
ENSG00000133131	MORC4	1174	934	954	834	876	644	990	1033	1097	1545	848	938	944	1285	1042	1237	583	942	1175	1120	8.13655	6.54691	5.79722	5.67364	5.61589	4.56826	6.10319	5.80617	7.9074	8.28197	5.09795	6.57834	7.02669	9.04642	6.64056	9.02037	4.61495	6.39741	8.38332	7.02525	0.364418	0.0817396
ENSG00000133138	TBC1D8B	218	216	186	145	184	212	211	260	238	361	158	191	154	297	155	232	107	271	214	243	0.972696	0.984682	0.758007	0.678771	0.805869	0.987721	0.891472	0.997498	1.19877	1.29053	0.652753	0.901957	0.803676	1.36607	0.659881	1.16906	0.540408	1.20835	0.987848	1.01929	0.566231	-0.0739094
ENSG00000144579	CTDSP1	4018	3313	3082	2867	3023	2525	3176	3420	3076	5660	3157	3094	2452	3843	2845	2965	2432	3496	3842	4168	42.724	35.0245	28.0334	29.5441	29.593	26.3185	28.7609	28.7928	33.3301	45.0103	28.3772	32.6888	28.306	39.3852	26.6472	34.0084	28.1327	36.0441	42.0917	40.4003	0.998099	-0.000198248
ENSG00000067840	PDZD4	269	147	214	177	151	162	191	211	270	422	156	213	160	237	234	413	65	234	283	423	1.88998	0.996526	1.37179	1.19054	0.951486	1.15641	1.26468	1.16995	1.98784	2.39394	1.01593	1.70782	1.22678	1.89391	1.56052	3.15135	0.49754	1.67897	2.01029	2.78163	0.371498	0.176878
ENSG00000146592	CREB5	1389	1107	826	773	845	816	840	926	1380	1505	798	886	778	1825	837	1528	712	1211	1362	1227	5.39068	4.40001	3.18101	3.2465	3.48537	3.29074	2.84987	3.11638	5.48607	5.19214	3.47632	3.40232	2.95515	7.22083	3.36012	7.43349	3.0269	4.62635	5.72283	4.45253	0.266133	0.165252
ENSG00000141068	KSR1	1237	1109	1324	1167	963	836	792	1253	941	987	1097	1281	1153	1035	1183	1571	804	790	1325	1641	5.80199	4.93627	5.04555	5.26373	4.19054	3.75311	3.05576	4.41145	4.2665	3.39294	3.70561	5.15299	5.49164	4.1414	4.63673	7.27403	3.93059	3.35244	6.6421	6.51121	0.0677521	0.215058
ENSG00000137309	HMGA1	541	557	806	553	446	453	580	730	669	974	704	525	606	625	606	617	502	603	607	811	6.66598	7.22534	8.80414	6.78621	5.21678	5.85708	6.446	7.64623	8.47037	9.87269	7.80143	6.66937	8.22582	8.14109	7.10581	8.31183	7.18109	7.41473	7.99141	9.28064	0.413392	0.0703669
ENSG00000144681	STAC	407	330	533	427	242	261	997	909	558	700	289	461	659	561	347	340	369	311	508	438	3.21118	2.6163	3.71289	3.34328	1.78431	2.09396	7.09166	5.8228	4.58962	4.3275	2.02446	3.72631	5.63078	4.54093	2.51661	2.85652	3.34983	2.40106	4.13276	3.11388	0.377489	-0.199346
ENSG00000172824	CES4A	93	58	96	78	69	49	78	80	83	83	129	92	50	55	75	106	51	88	78	93	1.09833	0.710938	1.05561	0.982603	0.708621	0.63747	0.833426	0.738123	0.995283	0.781456	1.5304	1.27846	0.657539	0.644109	0.904407	1.49652	0.710064	1.19094	1.07217	1.11966	0.325345	0.153526
ENSG00000173193	PARP14	1081	885	1643	1627	1484	1411	1077	1368	2441	2055	1000	1290	1068	1013	1428	1505	673	882	1344	1550	3.30034	2.7334	4.64976	5.1337	4.46267	4.62251	3.09599	3.55851	8.17408	4.9928	2.85758	4.25109	3.70901	3.29051	4.23102	5.15494	2.45648	2.66383	4.33597	4.34194	0.0409215	-0.295063
ENSG00000067596	DHX8	784	633	1023	734	707	689	703	955	914	863	606	729	646	712	646	862	398	720	879	940	5.28883	4.09525	5.45563	5.0305	4.91286	4.54352	4.02656	5.07457	6.13948	5.07794	4.47629	5.84218	4.37929	5.31072	3.63418	6.30504	3.0475	5.83277	6.01027	6.09625	0.179634	-0.10997
ENSG00000116604	MEF2D	4315	4233	6541	4985	5449	4792	5295	7875	5477	5550	5449	4743	4916	3162	4877	5703	2924	4353	5233	6217	18.7897	18.4181	25.3626	21.4217	22.0979	21.2258	20.6407	27.9084	24.6832	18.6669	21.0175	21.2832	23.2177	14.0943	19.6373	26.5431	14.5879	18.5453	23.2948	24.523	0.214917	-0.134121
ENSG00000070808	CAMK2A	276	407	593	478	378	429	352	568	443	524	21	614	342	330	238	354	354	398	54	552	1.33187	2.19733	2.56691	2.32912	1.73413	2.15643	1.52257	2.2486	2.80799	1.95345	0.308652	3.03399	1.86434	1.61501	1.0471	1.81873	1.9488	2.26343	0.932209	2.54935	0.303634	-0.362971
NewGene_2774	NewGene_2774	1006	830	513	468	410	390	678	765	574	760	632	627	377	786	568	926	756	553	942	991	4.93325	3.67176	2.67848	1.88408	1.73863	2.03462	3.3915	3.26383	2.42476	3.73651	3.0992	2.95135	2.20785	3.51729	2.72002	5.19226	4.20899	2.28372	5.08125	3.74977	0.165161	0.239187
NewGene_2775	NewGene_2775	406	361	221	230	235	194	288	325	380	638	242	393	182	343	202	317	190	308	478	561	2.42703	2.58156	1.15753	1.36614	1.08073	1.0494	1.57416	1.36026	2.38115	2.78931	1.21461	2.67971	1.01867	1.65877	1.16063	1.67562	1.09723	1.57277	2.39743	3.30363	0.812755	0.0423799
NewGene_2773	NewGene_2773	1033	739	2732	563	2126	1324	1549	1659	769	1130	2196	1321	1817	860	1518	1669	1167	703	1678	2288	3.04532	2.20163	7.14213	1.63872	5.89067	3.99446	4.10704	3.97473	2.37069	2.60567	5.78932	4.01508	5.81648	2.57156	4.14163	5.26486	3.93553	2.0249	5.12026	6.11322	0.391938	0.218482
ENSG00000080189	SLC35C2	815	711	707	689	640	513	766	758	734	1246	729	742	596	961	689	713	586	842	980	808	5.60927	6.47913	5.32036	5.2425	5.10196	3.8249	6.12197	4.05411	6.94573	8.55916	3.89484	6.04252	4.11786	7.40401	4.59518	5.01159	6.59846	5.95638	8.10156	4.72775	0.258008	0.100323
ENSG00000101935	AMMECR1	315	236	216	198	183	203	233	274	287	401	164	242	212	201	204	292	148	285	275	250	1.46264	1.10278	0.882082	0.900377	0.792669	0.962584	0.976012	1.02345	1.38372	1.44381	0.674793	1.14922	1.05749	0.935407	0.869564	1.4374	0.7777	1.28167	1.30806	1.04252	0.453269	-0.0826605
ENSG00000101938	CHRDL1	6023	4725	1872	1539	2375	2218	3636	3043	4203	7908	143	3831	1768	8013	1471	6206	2042	5344	5743	5555	41.8988	33.4259	12.3187	10.9743	15.4302	16.3393	24.1097	18.3216	30.9922	41.4175	1.67095	27.1236	13.4072	55.215	9.32567	46.9503	16.1129	35.981	40.8683	34.2648	0.713075	0.158377
ENSG00000130653	PNPLA7	265	209	247	200	132	90	163	282	235	297	168	239	115	237	220	473	174	162	333	376	1.39499	1.1108	1.15562	1.04188	0.64997	0.485465	0.768248	1.20727	1.2894	1.23257	0.790381	1.29866	0.653461	1.25984	1.07149	2.66832	1.04501	0.830925	1.81274	1.79619	0.129318	0.301969
ENSG00000113389	NPR3	2736	2956	1390	1549	794	858	513	713	2108	4114	820	870	732	1903	587	2930	424	2321	2163	5775	10.7637	12.1625	5.35147	6.58327	3.24169	3.37924	1.78203	2.39108	9.11452	13.9847	3.03507	3.85927	3.08106	8.12493	2.3387	12.428	2.12705	8.32467	8.80026	21.4187	0.876469	0.0663566
ENSG00000067334	DNTTIP2	996	1009	1198	1010	1067	975	1167	1202	1223	1514	973	1110	1128	1159	950	1194	863	1165	1117	1300	4.42947	4.38322	4.77689	4.31519	4.3128	4.29085	4.51124	4.19862	5.52284	5.09576	4.02734	4.93559	5.28866	5.17322	3.79605	5.49273	4.26089	4.98366	4.98637	5.18887	0.633223	0.0259056
ENSG00000113387	SUB1	6085	6913	5577	5302	5486	5603	6259	5990	6084	9771	5821	5913	5226	7419	5247	4938	5106	6983	5794	6553	45.318	52.1708	36.3846	37.8637	40.2645	42.4716	40.8011	37.8467	51.1309	56.59	38.9759	44.5337	42.3396	55.7087	35.1266	38.7662	43.8162	50.6992	44.6203	45.4951	0.921695	-0.008769
ENSG00000113384	GOLPH3	3119	2889	3034	2505	3109	3000	3045	3507	3259	4210	2601	3213	2334	2945	2489	2932	2012	3000	2978	3584	29.2856	27.3352	25.1736	23.2298	27.3853	28.7533	25.7025	26.7295	31.9198	30.8838	21.7183	31.0292	23.7161	27.962	21.4929	29.3079	21.5278	27.5105	28.9163	30.458	0.0383037	-0.106204
ENSG00000099984	GSTT2	10	34	33	40	25	9	65	79	82	92	160	124	216	136	114	78	19	131	116	130	0.195764	0.725178	0.609692	0.835613	0.491383	0.190626	1.42875	1.367	1.83549	1.53231	3.16275	3.21781	5.01941	2.94716	2.25125	1.9155	0.464205	2.72211	2.56035	2.51971	2.27963e-05	1.50878
ENSG00000076258	FMO4	209	184	145	151	158	145	182	210	158	234	120	199	98	122	116	151	89	204	188	239	2.35317	2.09381	1.43952	1.67592	1.66355	1.65965	1.83787	1.91734	1.86229	2.05494	1.20117	2.30457	1.18928	1.38759	1.20714	1.81707	1.1406	2.23781	2.18762	2.43338	0.208506	-0.167518
ENSG00000180592	SKIDA1	117	131	113	146	141	125	164	170	189	164	161	206	160	125	177	132	88	102	220	163	0.44794	0.505375	0.382911	0.551577	0.508035	0.489631	0.565872	0.530594	0.760404	0.492578	0.552046	0.816182	0.667728	0.483717	0.627946	0.54212	0.386518	0.382964	0.874407	0.567419	0.340595	0.13778
ENSG00000180596	HIST1H2BC	38	60	78	41	45	58	75	133	47	98	37	38	38	120	52	118	46	122	44	74	1.44879	2.32422	2.65175	1.53049	1.62528	2.26631	2.62579	4.16574	1.87908	2.97408	1.24127	1.47316	1.57483	4.70455	1.86143	4.91512	2.01829	4.59865	1.71575	2.60902	0.670124	0.113972
ENSG00000073578	SDHA	13548	14226	21568	16164	16707	15739	17752	23414	14642	12798	17731	15732	17026	9781	19094	14287	10805	12417	15225	15027	151.115	159.341	212.958	172.623	173.205	178.108	174.108	207.215	169.133	108.479	171.249	172.386	210.098	111.179	198.849	171.394	137.291	132.594	167.405	146.552	0.441533	-0.109005
ENSG00000169203	NPIPB12	293	83	78	66	190	150	54	261	86	69	252	349	59	284	289	287	68	88	82	309	5.35163	1.20008	0.980144	1.00253	3.27614	2.70993	0.693781	3.85567	1.35997	0.769923	4.06183	6.60373	0.923436	5.31583	4.96722	5.82686	1.11773	1.28396	1.26387	5.00613	0.0768486	0.648149
ENSG00000089009	RPL6	25127	22257	16084	19695	16096	15243	24476	19774	15253	39449	18331	19585	16159	33296	17068	15527	18477	26142	21245	19397	652.366	602.381	364.372	508.03	390.011	380.593	620.638	427.955	420.995	829.741	440.004	533.828	439.328	870.295	417.39	440.545	503.601	659.788	579.827	469.116	0.763134	0.0462086
ENSG00000089006	SNX5	2250	2197	2071	1944	1990	2034	2372	2178	1989	3161	2019	2066	1876	2473	1821	1896	1732	2343	2109	2533	26.1546	25.7025	21.2302	22.2302	21.7288	24.2194	24.5533	20.3228	24.2659	28.8829	21.0386	24.5078	23.4491	28.5637	19.4945	23.648	22.9853	26.0828	25.5509	26.5452	0.874186	-0.0112032
ENSG00000269113	TRABD2B	219	188	144	123	139	191	139	162	156	245	132	139	84	161	161	268	73	192	181	290	0.788709	0.682125	0.460386	0.43644	0.471166	0.70277	0.447544	0.472331	0.586264	0.689589	0.425168	0.514219	0.326833	0.587889	0.53657	1.0328	0.300033	0.6765	0.674294	0.947065	0.976806	0.00496879
ENSG00000117266	CDK18	1749	1818	4071	3200	2768	2712	2462	3452	1711	1734	2128	2790	2594	1544	2151	1710	1984	1379	2278	1779	14.1595	14.9387	30.7697	28.9988	21.7672	22.7701	19.0793	23.5689	15.0506	11.4142	16.573	24.0734	23.6111	12.4416	16.9682	14.9102	18.8129	10.8065	19.6567	12.9478	0.197504	-0.25595
ENSG00000117262	GPR89A	460	466	582	353	495	442	451	677	456	608	652	508	349	498	569	409	282	490	447	518	5.50518	5.76409	6.43064	4.56157	5.54905	5.52449	4.86106	6.82279	5.99963	5.78736	7.01146	6.40686	5.03128	6.18034	6.29977	5.24311	3.84393	5.73279	5.75412	6.76686	0.934471	-0.00887662
ENSG00000107833	NPM3	416	314	293	168	269	266	296	335	200	545	317	293	252	424	289	235	286	316	301	297	12.013	9.17097	7.50355	4.7745	7.29581	7.86875	7.69445	7.86193	6.04899	12.3144	8.18461	8.72013	7.90641	12.4195	7.7296	7.25436	9.44721	8.92693	9.00573	7.76385	0.683028	0.0625836
ENSG00000156508	EEF1A1	309334	285044	240661	236783	221969	202922	318693	277687	211477	432454	228249	259126	222703	429520	230086	226804	253454	329335	269339	287075	3156.05	2471.44	1750.35	2534.01	1994.8	1613.33	3100.09	2209.1	2382.21	2847.15	1768.27	2848.95	2637.99	3827.28	2386.51	2620.88	3184.15	3496.04	2534.66	2426.77	0.460669	0.0937372
ENSG00000156502	SUPV3L1	922	905	1257	930	1035	1020	1120	1159	1036	981	973	1158	941	869	929	997	749	750	981	1075	9.41925	9.33654	11.3783	9.36525	9.93085	10.6552	10.2798	9.61212	11.0655	7.83836	8.88279	12.1876	10.4321	8.98932	8.77208	10.8896	8.74705	7.48059	10.3648	9.94543	0.440556	-0.0720942
ENSG00000156500	FAM122C	112	80	92	87	102	76	97	89	102	112	109	91	68	64	146	97	57	91	106	87	1.25679	0.891939	0.867939	0.972275	1.2398	0.876992	1.03767	0.891492	1.44117	1.06665	1.05858	1.00862	0.808782	0.72852	1.45632	1.06093	0.761704	1.03929	1.16243	0.883526	0.911424	0.0158275
ENSG00000156504	FAM122B	626	629	910	697	746	750	869	973	958	1149	815	768	718	775	806	649	601	858	756	939	4.54043	4.6623	5.32891	4.46326	4.87625	5.07986	5.16256	5.62475	6.61296	5.69604	5.27331	5.44243	5.27488	5.106	5.48035	4.59419	4.92427	5.8689	5.45527	5.6866	0.730674	-0.0273779
NewGene_9546	NewGene_9546	254	315	368	281	231	174	331	246	554	463	265	142	259	474	185	570	163	333	390	171	1.47288	0.88723	1.02299	0.919536	0.687124	0.830958	0.852118	0.803202	1.66036	1.02935	0.689367	1.44285	0.761853	1.23088	0.896239	1.85083	0.729797	1.24616	1.55261	1.11775	0.836245	-0.0473159
NewGene_9548	NewGene_9548	175	164	231	187	137	138	138	160	180	194	301	220	191	273	240	260	160	262	251	229	2.22295	1.80753	2.15145	2.25686	1.42577	1.70362	1.84848	1.49198	2.31412	2.05676	3.30437	2.65956	2.13657	3.37201	2.45514	3.23808	2.20601	3.31827	2.99692	2.43662	8.76414e-08	0.553943
ENSG00000103642	LACTB	536	614	853	608	764	749	622	715	715	913	629	691	585	697	582	758	460	639	517	652	6.54244	7.73681	9.44332	7.16001	8.7983	9.59323	6.98595	7.19232	9.22396	8.75079	6.95632	8.88375	7.88786	8.57808	6.61042	10.1513	6.48681	7.75895	6.65744	7.24609	0.193073	-0.120421
ENSG00000103647	CORO2B	524	447	461	476	413	299	363	528	468	709	264	318	276	583	211	423	357	462	416	418	3.72353	3.20232	2.88192	3.32888	2.74914	2.16735	2.31944	3.04596	3.47479	3.94061	1.65179	2.32425	2.12402	4.19283	1.37922	3.20854	2.89464	3.20223	3.05507	2.68078	0.0982246	-0.240209
ENSG00000064687	ABCA7	333	229	372	462	223	240	288	377	332	310	403	268	259	220	275	413	260	350	317	298	1.2348	0.856904	1.23281	1.96886	0.785874	0.997337	1.28069	1.14921	1.56611	0.901258	2.25565	1.14519	1.03958	0.856891	1.2207	1.67711	1.10535	1.48825	1.76639	0.999892	0.855041	0.0260452
ENSG00000263874	LINC00672	117	158	62	103	30	36	135	118	56	130	174	108	63	121	82	66	106	144	160	159	0.801416	1.09123	0.376429	0.69496	0.187593	0.252544	0.830049	0.653224	0.397312	0.695811	1.06281	0.759526	0.466739	0.840302	0.51633	0.47824	0.828797	0.962668	1.13389	0.985813	0.136152	0.403566
ENSG00000076928	ARHGEF1	1374	898	1116	1204	864	772	880	1192	1129	1614	915	1006	687	1146	891	1371	589	977	1134	1175	11.3302	7.4031	7.91384	9.75985	6.76579	6.14821	6.42627	7.61112	9.689	10.1474	6.47103	8.95531	5.9259	9.4474	6.47416	11.7953	5.46218	7.6009	9.37759	8.39293	0.34047	-0.0923605
ENSG00000076924	XAB2	1421	1246	1554	1333	1314	1152	1295	1866	1355	1962	1257	1426	1224	1506	1383	1720	921	1273	1442	1891	13.5179	11.9734	13.1019	12.5116	11.747	11.2062	11.0696	14.4185	13.4799	14.5976	10.6806	13.9745	12.6351	14.5224	12.173	17.4943	10.0149	11.8273	14.1882	16.2951	0.673117	0.0236817
ENSG00000143337	TOR1AIP1	4925	5283	6225	5247	5043	5102	5362	6436	5534	6575	5169	5210	5202	5780	4850	5613	4030	5379	5461	6664	24.6557	20.5031	27.4585	26.0412	17.6425	25.6673	19.0438	26.9531	27.5197	28.6583	21.2453	24.5429	22.364	26.1286	25.5356	27.7634	18.8029	24.9161	19.0789	34.819	0.892634	0.00618726
ENSG00000143333	RGS16	79	91	112	100	125	111	98	115	172	157	107	85	105	90	80	136	42	123	200	145	0.822299	0.95943	1.03443	1.02762	1.22499	1.18667	0.912947	0.974833	1.87293	1.27701	0.995579	0.909353	1.18598	0.952425	0.768231	1.52053	0.493261	1.24862	2.15687	1.3726	0.939552	-0.0132418
ENSG00000134020	PEBP4	1491	1871	2305	2181	1187	1222	2230	2368	748	940	1176	582	2720	1694	861	939	2127	852	792	739	42.2813	53.6661	57.9674	61.0722	31.6212	35.4901	56.8352	54.5564	22.2236	20.8861	29.7787	17.0944	83.7146	48.6813	22.5976	28.4692	69.0769	23.6185	23.274	19.0634	0.451884	-0.259231
ENSG00000168152	THAP9	273	301	431	308	314	331	385	381	363	405	329	321	330	302	306	374	266	312	253	421	1.87388	2.10245	2.60216	2.34949	2.62059	2.29878	2.53948	2.21299	2.58724	2.1424	1.99171	2.20207	2.6105	2.15871	1.94635	2.67841	2.17021	2.07304	1.90487	2.67387	0.605886	-0.0468845
ENSG00000189241	TSPYL1	4224	4627	7122	5383	5433	5585	5230	7440	5069	5688	6528	5897	5494	3977	5498	4778	4028	5350	5162	7840	32.2292	35.6599	48.1572	40.5172	38.9437	43.5762	35.8644	46.1012	40.4581	33.944	44.5082	46.363	45.489	30.75	38.8073	38.9768	35.1476	39.8589	40.7504	54.1798	0.776621	0.0315004
ENSG00000168159	RNF187	4537	4063	4207	3349	3300	2983	4227	4869	3574	5546	4155	3669	3381	3912	3738	4534	2877	4294	4031	5276	38.291	34.5377	31.4262	27.786	26.1003	25.6732	32.0846	33.43	31.4688	36.5472	31.2515	31.824	30.9197	33.3764	29.1972	40.9683	27.7632	35.3217	35.195	40.4162	0.447276	0.0457959
ENSG00000111832	RWDD1	1808	1693	1931	1786	1426	1645	1991	1887	1503	2916	1481	1554	1518	2239	1491	1676	1389	1941	1355	1847	14.3146	14.9984	12.4903	11.8683	10.7556	12.2187	14.7979	13.6829	11.4739	20.0964	9.91006	13.8344	11.2237	18.8453	11.8138	11.6935	13.1061	15.5308	11.5113	13.0823	0.383241	-0.0841904
ENSG00000170100	ZNF778	382	367	400	360	293	281	377	545	422	370	332	361	370	231	383	401	260	354	383	406	1.24243	0.96354	1.42334	0.943371	0.728387	1.08902	0.91242	1.08381	1.14599	0.724376	0.684621	0.865628	1.44694	0.79844	1.13101	1.08938	0.687501	0.843055	1.25949	1.36827	0.641175	-0.0491198
ENSG00000183354	KIAA2026	667	659	1037	817	660	746	754	950	1153	1164	730	881	730	835	881	1014	528	798	869	1007	2.59491	2.63444	3.62859	3.3035	2.58561	3.4086	3.56569	3.08719	4.83119	3.57721	3.69335	3.55887	3.01023	3.29672	3.21675	4.29581	2.61503	3.03077	3.60581	3.53937	0.839836	0.016991
ENSG00000119760	SUPT7L	1607	1518	1832	1603	1409	1441	1704	1959	1716	1745	1668	1591	1479	1637	1809	1758	1279	1536	1684	2098	11.4855	9.87292	12.1219	11.3503	10.3531	10.4251	12.0672	11.2227	11.9636	10.0632	9.8857	10.1466	11.3922	10.3061	10.779	13.4776	9.95492	10.4498	13.4482	13.2274	0.223624	0.0676552
NewGene_327	NewGene_327	94	74	104	103	39	43	124	138	63	131	47	111	38	38	62	50	82	84	26	62	0.856517	0.750782	0.739983	0.88939	0.424753	0.366229	0.907529	0.982672	0.876436	0.863718	0.358769	1.00561	0.326163	0.555676	0.510392	1.02336	0.802894	1.32052	0.432577	0.447946	0.0831604	-0.471095
NewGene_323	NewGene_323	259	211	140	82	259	330	34	135	105	140	207	663	62	63	96	77	324	447	395	300	1.39466	1.29902	0.833608	0.522201	1.47795	1.97418	0.162199	0.593294	0.799558	0.749931	1.18765	4.09119	0.414694	0.506399	0.467046	0.622892	2.31092	2.54121	2.61691	1.61972	0.118881	0.673726
ENSG00000019991	HGF	219	250	185	156	197	234	158	163	312	433	155	251	185	324	177	253	110	233	255	458	1.03431	1.14598	0.775487	0.731316	0.862367	1.0664	0.732878	0.665279	1.59464	1.69809	0.750375	1.2492	0.882242	1.71923	0.755411	1.20811	0.547357	1.02877	1.26429	1.96096	0.557008	0.106307
ENSG00000147059	SPIN2A	73	56	34	28	44	28	37	31	29	83	67	64	45	81	37	44	19	47	49	29	1.03351	0.925086	0.608178	0.278997	0.532887	0.439773	0.410205	0.301337	0.508609	1.05235	0.842853	0.924596	0.730599	1.08112	0.343844	0.502534	0.249946	0.685824	0.911506	0.308659	0.419372	0.203175
ENSG00000197776	KLHDC1	400	426	504	363	366	387	379	455	608	670	422	519	398	403	360	482	330	409	486	450	3.76512	4.07532	4.2087	3.40382	3.25479	3.733	3.25922	3.56307	6.02566	4.93593	3.56381	5.15536	4.08339	3.85168	3.12784	4.85154	3.5772	3.7719	4.73538	3.83898	0.899228	-0.0110047
ENSG00000135776	ABCB10	643	802	837	665	757	675	636	810	991	1017	779	725	678	740	763	797	572	769	748	830	4.2282	5.32992	4.87914	4.31088	4.6758	4.53789	3.75663	4.32425	6.81725	5.23204	4.57722	4.90987	4.83702	4.92995	4.64173	5.60601	4.30301	4.94056	5.08672	4.94611	0.947159	-0.00444765
ENSG00000135775	COG2	869	760	1090	765	777	809	773	1182	951	1033	844	711	826	685	833	948	597	777	903	973	7.54219	6.6633	8.43175	6.59285	6.36395	7.21304	6.04638	8.40919	8.72582	7.05915	6.61701	6.38296	7.8263	6.06902	6.69537	8.88093	5.92331	6.58677	8.15809	7.67492	0.284428	-0.078742
ENSG00000139428	MMAB	1315	1371	1417	1472	1365	1355	1395	1504	1129	1753	1571	1481	1205	1593	1339	1092	1103	1491	1418	1661	12.0481	16.6018	11.5215	17.9048	13.1919	14.4464	12.7583	8.78994	10.4133	15.6827	8.15782	17.0271	11.2285	18.2564	12.5822	9.2902	15.779	12.3471	13.5308	13.7253	0.50092	0.0558628
ENSG00000147050	KDM6A	504	522	609	433	580	515	511	667	1086	1067	601	626	942	894	930	1110	567	794	599	1150	2.40381	2.32658	2.5443	1.8951	2.64534	2.5577	2.05163	2.44689	5.19933	4.81163	2.40822	3.08582	4.78576	4.44962	3.86815	5.46325	3.06878	3.67519	3.46206	4.64656	0.00365222	0.431163
ENSG00000152990	ADGRA3	1019	820	831	717	809	764	886	909	1125	1564	638	910	621	1203	713	1315	577	1004	1085	1575	5.79873	4.63713	4.09541	3.99552	4.22354	4.39001	4.43366	4.19176	6.63246	6.8714	3.19185	5.21079	3.74979	6.80843	3.6644	7.83712	3.68041	5.63016	6.26266	7.97368	0.488572	0.0873548
ENSG00000197774	EME2	343	313	220	267	193	209	268	332	265	379	280	379	172	313	225	378	213	287	415	307	1.96629	1.84901	1.0753	1.54572	1.00333	1.17837	1.50292	1.51177	1.68873	1.80134	1.4061	2.26893	1.08965	1.8051	1.34117	2.42201	1.34579	1.69314	2.43648	1.59378	0.215756	0.158797
ENSG00000165644	COMTD1	222	177	189	178	120	162	147	195	140	275	144	175	137	216	182	151	232	141	174	217	5.74721	4.63562	4.34612	4.56308	2.91319	4.3016	3.4198	4.10319	3.79944	5.57997	3.3296	4.68672	3.84651	5.66882	4.37225	4.186	6.87963	3.56268	4.6764	5.09225	0.601809	0.0793393
ENSG00000132740	IGHMBP2	308	245	327	274	234	218	243	359	289	299	286	294	239	283	357	365	183	283	303	358	1.97202	1.67567	1.85437	1.72804	1.40753	1.42786	1.39529	1.86389	1.93359	1.49769	1.76401	1.93531	1.65765	1.8315	2.18434	2.49435	1.34647	1.76787	2.11136	2.0765	0.0853228	0.142004
ENSG00000153029	MR1	482	422	289	264	332	330	376	339	425	658	177	339	182	570	165	424	226	427	417	456	1.95338	1.9368	0.890379	1.51258	1.51041	1.92348	1.26757	1.54883	1.7449	2.85693	0.509092	1.39587	1.06937	2.74067	0.931859	2.70704	0.873863	1.45358	1.53773	2.14261	0.428143	-0.152078
ENSG00000187024	PTRH1	216	212	295	224	191	232	229	269	193	354	318	239	150	302	226	217	188	309	263	261	6.91562	6.02472	7.52362	6.28913	5.22665	6.54486	5.74853	5.92699	6.22499	7.956	7.4674	7.19806	5.08239	9.56011	6.67838	5.14525	6.30583	8.62435	7.36422	6.63975	0.332499	0.111108
ENSG00000142039	CCDC97	976	750	729	671	701	660	718	930	695	1067	766	738	610	901	696	1050	519	800	875	859	7.9226	5.94069	5.09137	5.34881	5.41416	5.22946	5.07099	6.03553	5.86688	6.49809	5.88455	6.13873	5.09098	7.32421	5.16373	8.89638	5.27396	6.29001	7.51365	6.13523	0.492931	0.052224
ENSG00000162148	PPP1R32	84	60	34	27	48	29	53	35	48	59	50	54	32	45	43	51	58	27	77	41	1.79887	1.15625	0.525264	0.462405	0.830943	0.597021	0.9845	0.56421	0.911647	0.8665	0.792106	1.05276	0.67924	0.870095	0.822802	1.27248	1.26451	0.439769	1.61112	0.663042	0.691276	0.0931297
ENSG00000188629	ZNF177	94	106	140	51	100	55	137	139	124	102	135	141	64	113	79	55	42	75	96	28	1.11224	1.30294	1.58156	0.644852	1.03488	0.697023	1.57985	1.25549	1.70051	0.964926	1.5725	1.93162	0.796988	1.50491	0.931278	0.711497	0.56689	0.986177	1.09066	0.343974	0.326739	-0.252596
ENSG00000180035	ZNF48	217	138	249	177	145	183	219	236	210	294	211	180	179	154	166	215	152	220	199	267	1.69276	1.09857	1.68113	1.3339	1.03912	1.43097	1.50464	1.4996	1.65278	1.80261	1.42946	1.40153	1.49258	1.17689	1.17161	1.76863	1.31113	1.66855	1.56404	1.84189	0.918727	-0.0100604
ENSG00000162144	CYB561A3	1154	954	1005	740	627	731	952	1012	799	1329	755	889	787	1274	774	1036	554	1037	1135	1312	9.31829	7.80353	7.08362	5.86068	5.14767	6.04385	7.05482	6.76384	6.55761	8.44571	5.36872	7.49733	6.86199	10.4078	5.82089	9.03989	5.15175	8.14883	9.63252	9.6984	0.337505	0.100724
ENSG00000090054	SPTLC1	1689	1714	1691	1595	1868	1687	1507	1824	1967	2473	1450	1461	1476	1887	1661	1637	1157	1532	1690	2139	17.0117	18.9777	16.1208	16.5806	18.4354	17.2115	14.057	16.405	21.4373	19.0756	13.2439	16.5127	17.4661	19.5185	15.6599	18.4254	14.3024	15.1207	18.1222	20.3993	0.122081	-0.0956876
NewGene_580	NewGene_580	92	114	206	198	115	93	274	167	124	206	209	172	136	162	216	115	167	101	117	86	2.20605	3.33087	4.6839	6.03256	2.90367	2.384	6.3204	3.6601	3.93584	4.94658	4.69185	4.98722	3.71734	4.61536	5.37568	3.13068	4.78179	2.75489	3.4876	1.94216	0.935492	0.0188835
ENSG00000101096	NFATC2	521	324	418	249	557	465	316	376	412	577	281	412	327	414	274	440	270	187	502	576	1.8018	1.10349	1.26636	1.16648	1.77157	1.60274	0.958775	1.02873	1.46832	1.53936	0.846667	1.4399	1.19958	1.44852	0.859978	1.60327	1.03926	0.859077	1.75365	1.76101	0.399709	-0.142788
ENSG00000101098	RIMS4	149	108	56	55	52	54	98	97	92	206	25	111	53	222	30	121	63	141	227	113	0.722085	0.531267	0.239796	0.261267	0.235235	0.267121	0.427876	0.384027	0.466252	0.784031	0.105455	0.556083	0.27541	1.09413	0.131624	0.629483	0.346851	0.670707	1.14299	0.496789	0.407847	0.275331
ENSG00000112715	VEGFA	3395	3035	4413	3885	3120	3243	3525	4828	3425	3166	3766	3436	4255	2374	4151	3544	2450	2870	3401	3486	25.2542	24.3075	29.7581	28.9802	22.6266	25.1528	23.9267	29.0765	28.6518	19.5072	26.4844	27.4971	38.2615	17.9841	31.363	31.241	24.2205	22.2907	28.1163	23.6071	0.871678	-0.0199228
ENSG00000070495	JMJD6	1004	918	1373	1023	958	1088	1016	1215	987	986	960	845	987	757	1081	967	663	856	995	1161	5.62753	5.4052	6.53691	5.96966	4.96976	6.15151	5.51108	6.504	5.74259	4.96607	4.4258	4.98774	5.73312	4.35058	5.58603	6.378	5.47754	4.4462	5.66609	5.7986	0.183227	-0.128821
ENSG00000090581	GNPTG	1473	1347	1092	1200	1224	1256	1248	1618	1261	2446	1292	1225	977	1902	1285	1408	1052	1272	1532	1561	19.5859	18.1946	13.3145	15.9637	15.0856	17.0108	14.9906	17.3931	17.9279	25.3255	15.3051	16.6223	13.834	25.4031	15.7021	20.5573	16.3572	17.1089	21.7605	19.0362	0.866007	0.0163972
ENSG00000138468	SENP7	794	960	884	743	733	796	800	906	1093	1195	909	1027	780	860	807	996	683	882	937	1161	5.10889	5.71475	5.54574	4.45666	4.70118	4.50228	4.83512	4.0044	6.42512	5.59409	4.56963	7.1316	5.73417	5.46723	4.31949	6.40691	4.75719	4.88037	5.46579	5.98217	0.138419	0.0942864
ENSG00000164597	COG5	1228	1236	1490	1368	1461	1342	1252	1782	1638	1930	1464	1314	1402	1496	1345	1685	1000	1224	1313	1596	6.85741	7.00319	7.38675	7.66214	7.67166	7.67108	6.39811	8.09688	9.58683	8.42179	7.3038	7.60351	8.5736	8.47752	6.96875	10.0086	6.41689	6.90824	7.62411	8.05663	0.836449	-0.0134371
ENSG00000164591	MYOZ3	13443	13367	18645	14315	11783	11028	15727	23674	18404	18247	21536	14772	15064	12732	19936	18251	10531	11768	17064	18844	103.163	103.073	126.605	108.665	84.9187	85.9879	108.556	147.043	148.043	108.174	143.518	116.051	123.898	98.139	139.663	152.537	91.7132	87.6803	134.496	128.724	0.385716	0.0994681
NewGene_11624	NewGene_11624	10	78	170	85	39	30	78	83	32	11	39	60	113	99	79	114	113	30	63	24	0.045364	0.386438	0.745858	0.413558	0.177159	0.150164	0.342853	0.33338	0.162088	0.041703	0.17218	0.301454	0.603309	0.492397	0.359449	0.600652	0.639521	0.144709	0.31853	0.104278	0.399633	0.373032
ENSG00000148143	ZNF462	241	253	365	363	288	267	273	354	446	428	285	287	351	322	359	542	226	252	359	340	0.608362	0.630611	1.06594	1.08809	0.66784	0.716801	0.610541	0.971603	1.40342	0.815794	0.642426	0.795374	0.956427	0.839748	0.813275	1.6244	0.625089	0.61501	0.913828	1.08481	0.448067	0.0958163
ENSG00000181852	RNF41	1292	1280	1417	1092	1154	1147	1440	1510	1360	1479	1402	1320	1256	1187	1238	1292	951	1273	1338	1516	7.42592	7.00695	6.55924	5.42578	5.17891	6.44123	6.42322	6.01004	6.65598	6.17303	6.20881	7.3149	7.8817	5.94595	5.78933	9.1718	5.09934	5.95865	6.42247	6.65569	0.629817	0.0267999
ENSG00000181856	SLC2A4	5649	5909	8687	7633	6354	6392	6249	10459	6492	5339	8084	6765	7544	3152	7396	5761	3972	4961	6888	7431	42.8117	45.282	59.5128	55.9459	44.3383	50.155	42.0642	64.8277	51.4997	31.1186	55.228	52.9073	60.8355	24.1332	52.8168	47.1592	33.8449	36.7355	53.1505	51.513	0.556087	-0.094314
ENSG00000168936	TMEM129	2036	1926	2362	2214	1993	1657	1799	2748	2174	3022	2260	2016	1884	2164	2124	2607	1547	2209	2304	2262	19.5564	18.497	19.4237	20.9088	17.4781	15.9979	15.2379	21.1596	21.8371	21.8554	18.969	20.4898	20.1235	20.2935	18.5573	26.5941	17.2775	20.4273	22.5819	19.2726	0.436568	0.0441281
ENSG00000168939	SPRY3	69	95	104	86	86	79	60	127	89	108	93	90	73	62	85	113	36	57	91	84	0.193085	0.267371	0.257349	0.238626	0.227136	0.225159	0.150664	0.288012	0.261245	0.237106	0.231902	0.25994	0.220824	0.174901	0.220441	0.337826	0.11362	0.156249	0.262168	0.213906	0.337361	-0.141724
ENSG00000168938	PPIC	1416	1249	1169	1102	1103	1108	1044	1325	1427	2406	1092	919	1106	1657	1178	1226	828	1462	1420	1606	26.0333	23.185	19.0441	19.9819	19.0488	20.835	17.2463	19.7869	27.4376	34.5983	17.9338	17.3978	22.0535	30.8771	20.043	24.0953	17.4085	26.2402	27.0025	26.747	0.905544	-0.0120874
ENSG00000126882	FAM78A	532	521	939	817	705	527	685	971	804	905	635	561	570	478	548	552	643	599	574	553	3.53983	3.53338	5.32388	5.16106	4.40535	3.62437	4.1221	5.26096	5.53826	4.73956	3.79668	3.70505	4.08849	3.20558	3.3863	3.92944	4.94871	3.88944	3.90053	3.33625	0.0365305	-0.264529
ENSG00000186088	GSAP	298	304	238	223	314	219	318	351	373	427	266	386	253	318	329	304	288	394	301	527	2.32268	2.39481	1.64198	1.76325	2.2967	1.78997	2.22643	2.21939	3.04019	2.60261	1.85131	3.16477	2.14096	2.53824	2.37442	2.59357	2.61299	2.99764	2.42723	3.75828	0.0583398	0.212082
ENSG00000204923	FBXO48	161	151	184	173	122	106	119	144	201	193	150	117	161	160	110	154	93	144	126	207	0.72028	0.678781	0.730238	0.760208	0.511588	0.483173	0.477876	0.523756	0.940404	0.673796	0.599091	0.535593	0.781095	0.724261	0.451953	0.733497	0.473933	0.626697	0.580504	0.836639	0.614998	-0.0597739
ENSG00000204922	UQCC3	392	456	485	445	308	328	475	513	371	774	526	455	339	506	570	404	392	539	419	464	4.90627	5.99054	5.4747	5.66242	3.47387	4.36536	5.47525	5.22977	5.05284	7.85946	6.12616	5.57249	4.78618	6.68029	6.87169	5.60445	5.80041	6.85567	5.62217	5.46887	0.289885	0.12237
ENSG00000204920	ZNF155	274	240	247	228	243	246	239	264	396	402	351	291	257	258	22	271	180	210	270	357	2.76	2.49163	2.18086	2.26988	2.11287	2.61323	1.9893	1.9876	4.06418	3.07306	3.55656	2.97246	2.7282	2.55187	0.880648	2.86382	2.00902	2.35573	2.77864	2.99544	0.6957	-0.099443
ENSG00000008441	NFIX	7303	6774	7732	7160	5964	4980	7538	9683	7197	9235	6018	6416	5707	6793	6611	9349	4423	8110	8423	8387	36.5295	33.7532	34.2651	35.0649	27.5732	24.2605	33.997	39.4465	37.8983	35.3027	25.6657	32.6383	30.6695	34.1826	29.7264	51.5579	24.6027	39.5737	42.9236	37.4398	0.997397	0.000246664
ENSG00000182504	CEP97	615	631	1056	592	659	612	601	933	934	831	737	733	776	600	826	842	404	619	809	874	1.98035	1.93237	2.8391	1.77173	1.87706	1.9357	1.64389	2.31164	2.96398	1.9791	2.08374	2.29159	2.58259	1.85613	2.3317	3.21281	1.41678	1.84547	2.53808	2.40124	0.836496	0.0222759
ENSG00000121542	SEC22A	380	341	306	257	398	286	373	397	374	637	314	321	267	400	320	280	259	407	439	459	2.97289	2.38809	1.81979	2.32163	2.6457	2.50664	2.2918	2.34135	2.74292	3.82225	1.84851	2.64142	2.37778	2.81935	2.18813	1.93524	2.13936	3.1388	2.93058	3.23444	0.767476	-0.0314777
ENSG00000167680	SEMA6B	581	454	866	1116	766	680	534	1094	807	746	861	673	548	446	798	968	311	562	854	982	3.69372	2.91703	4.88343	7.00474	4.57685	4.42269	3.05511	5.65617	5.36967	3.71468	4.89357	4.41225	3.78569	2.87743	4.69794	6.58448	2.26069	3.48881	5.61967	5.66012	0.60456	-0.0886707
ENSG00000104805	NUCB1	6907	5526	6926	5550	6320	5532	6393	8153	6092	8175	6244	5718	5545	6576	5712	7090	3696	6434	6879	7660	65.8448	53.1506	58.9127	52.1747	56.6121	53.8247	54.7969	63.5029	60.7659	60.9932	53.2534	56.1618	57.2635	63.4782	50.333	72.4669	40.2877	60.0037	67.7461	66.1749	0.581382	-0.0283088
ENSG00000167685	ZNF444	550	457	640	542	385	418	459	704	526	704	655	593	456	576	649	703	341	628	604	867	7.70334	6.06242	7.615	7.22027	4.66634	5.55335	5.41174	7.66378	7.14602	7.07862	7.72426	8.14237	6.39897	7.58272	7.78751	9.91409	5.18339	7.79059	8.73333	10.0561	0.00487562	0.237095
ENSG00000106400	ZNHIT1	1689	1716	1510	1529	1368	1278	1817	1736	1341	3069	1875	1544	1350	2395	1700	1442	1299	1882	1549	1648	34.9866	35.9086	27.7154	31.2461	26.6168	27.0555	33.8249	29.2054	29.0525	49.7204	34.6963	32.9504	30.3274	50.2802	32.5767	31.924	30.7674	38.0578	33.1884	30.9124	0.562648	0.0655911
ENSG00000237412	PRSS56	76	87	66	68	67	73	60	83	111	139	69	53	8	96	37	86	76	106	122	107	0.885836	1.02747	0.682501	0.777901	0.729689	0.876398	0.633834	0.784534	1.36008	1.27212	0.717385	0.63583	0.092817	1.13825	0.400842	1.08016	1.01198	1.21127	1.47735	1.13824	0.83847	-0.0554676
ENSG00000177508	IRX3	343	276	151	119	186	130	322	269	256	551	176	210	122	418	186	276	170	297	240	334	3.34313	2.71281	1.30378	1.13651	1.70353	1.28755	2.81891	2.12706	2.61056	4.2043	1.53338	2.10555	1.28839	4.12542	1.67116	2.87835	1.88502	2.82256	2.41953	2.94378	0.974593	-0.00690791
ENSG00000187840	EIF4EBP1	609	445	397	467	340	289	627	529	318	914	475	371	368	722	402	408	400	521	503	519	15.1428	11.1619	8.73725	11.4413	7.94058	7.34036	14.0191	10.6804	8.26963	17.7835	10.5597	9.51216	9.91904	18.1879	9.24681	10.8399	11.3746	12.6573	12.9343	11.6773	0.859753	0.0276247
ENSG00000117228	GBP1	821	552	799	786	908	859	699	802	2072	2016	622	418	484	889	561	1047	463	469	778	812	6.85889	4.66244	5.91399	6.48104	7.12654	7.34185	5.24665	5.4431	18.1257	13.1794	4.64052	3.59587	4.38819	7.53089	4.33947	9.35279	4.42134	3.82317	6.7263	6.14372	0.004639	-0.564651
ENSG00000123933	MXD4	2453	2007	2190	2272	1790	1419	2388	2478	2243	3766	1859	2091	1723	2640	1731	2568	1554	2419	2496	2969	16.0642	13.3826	12.4638	14.5209	10.8861	9.3818	14.1988	13.2864	15.6458	19.5083	10.8478	14.3771	12.0989	17.5086	10.5393	18.9987	11.8713	15.5134	16.7206	17.3215	0.842474	0.0178467
ENSG00000140526	ABHD2	1370	1005	1369	1139	1063	34	1066	1381	1708	1483	848	1061	1089	1148	1106	1937	628	1044	1296	1884	3.98503	2.94829	3.52432	3.27021	2.90136	0.367819	2.78312	3.25673	5.20326	3.36939	2.19928	3.17412	3.43227	3.38687	2.97051	6.01654	2.08616	2.96097	3.89497	4.95616	0.695508	0.121836
ENSG00000140525	FANCI	88	57	64	85	39	38	102	78	72	148	44	66	53	62	63	83	52	87	110	69	0.467108	0.306358	0.348351	0.460734	0.203755	0.239675	0.483176	0.333352	0.414282	0.617118	0.206755	0.355557	0.30011	0.334009	0.311507	0.4699	0.31503	0.449721	0.604139	0.329829	0.738962	-0.0646353
ENSG00000140521	POLG	1398	1229	1697	1390	1293	1173	1239	1563	1412	1573	1353	1267	1238	1301	1249	1713	821	1129	1384	1678	8.11553	8.45881	9.1225	7.80537	7.1446	6.97592	6.3753	7.30812	9.62224	7.57866	7.32894	7.47961	7.7888	8.87066	6.96613	10.8982	5.92607	7.21142	8.59101	9.17255	0.650656	-0.0301852
ENSG00000167107	ACSF2	1281	1165	1563	1153	1273	1235	1271	1418	899	954	1319	1431	1247	1003	1138	1074	868	1185	1282	1069	14.6697	13.3723	15.9435	13.1028	15.0055	14.3908	14.1187	13.4567	11.0071	8.62992	13.6394	16.9506	15.5606	12.1034	12.2911	13.2881	11.428	13.1555	16.7044	11.3916	0.930329	-0.0111128
ENSG00000167106	FAM102A	706	590	473	378	557	560	511	614	598	978	428	495	416	596	451	644	337	565	674	632	4.3346	3.88081	2.88453	2.40774	3.47943	3.77154	2.96044	3.12398	4.02063	4.74748	2.75353	3.27161	2.84789	3.76198	2.69146	4.52148	2.43133	3.46986	4.45372	3.71174	0.269688	-0.11712
ENSG00000167100	SAMD14	332	424	633	533	458	355	365	375	408	640	574	435	366	430	491	671	263	559	533	512	2.08007	2.52934	3.40334	3.11012	2.48533	2.07777	1.93402	2.17381	2.52814	3.0511	2.95513	2.6174	2.32588	2.51534	2.62944	4.29231	1.75744	3.25249	3.19746	2.72818	0.226098	0.15323
NewGene_10778	NewGene_10778	285	209	157	158	122	123	236	210	212	221	79	204	118	241	140	251	100	176	230	182	2.59194	1.91575	1.26286	1.41779	1.03566	1.14154	1.92603	1.54688	2.00985	1.56975	0.634877	1.90324	1.16032	2.2157	1.17111	2.44102	1.03453	1.56247	2.15935	1.49336	0.540148	-0.1116
NewGene_10779	NewGene_10779	92	55	104	67	87	77	90	126	92	111	72	98	97	61	86	105	64	112	80	94	1.3411	0.799315	1.3433	0.953996	1.19496	1.13809	1.17301	1.49454	1.40158	1.26469	0.933453	1.47318	1.52856	0.895962	1.15434	1.62974	1.05518	1.58918	1.20107	1.2387	0.814039	0.0316674
NewGene_10775	NewGene_10775	135	73	559	527	267	410	519	73	358	637	53	477	466	591	56	251	258	521	41	613	0.654277	0.356259	2.40969	2.52648	1.21746	2.03951	2.26787	0.286713	1.82039	2.42465	0.22631	2.39103	2.45983	2.90511	0.247967	1.30096	1.43438	2.47369	0.202436	2.69763	0.958829	-0.0263102
ENSG00000166851	PLK1	60	49	50	36	47	32	61	39	33	56	44	29	21	27	34	42	23	46	65	74	0.711196	0.552994	0.499972	0.419373	0.496299	0.37786	0.630341	0.358595	0.390263	0.506077	0.439033	0.338479	0.274008	0.311292	0.363129	0.595438	0.318351	0.510765	0.754779	0.758735	0.440743	-0.157384
ENSG00000166855	CLPX	2013	2083	2839	2291	2450	2444	2344	3027	2686	2421	2630	2757	2345	1895	2486	2426	1679	2094	2313	2780	10.8863	11.4171	13.5991	12.2282	12.4547	13.5064	11.4293	13.2877	15.2039	10.2549	12.7096	15.4044	13.7659	10.5388	12.5323	14.0822	10.3801	11.0657	12.9426	13.615	0.942117	-0.00652985
ENSG00000163374	YY1AP1	2186	1855	2238	1790	1798	1741	2114	2537	1849	2386	1833	2115	1785	1817	2073	1940	1290	1973	1982	2382	20.3846	17.5759	19.0866	16.6275	15.7923	16.8291	18.2834	19.2559	18.0088	17.4661	14.9433	19.9879	17.9065	16.6773	18.3613	18.9119	13.8714	17.7937	19.3628	19.9275	0.634491	-0.0266489
ENSG00000163376	KBTBD8	62	70	83	55	109	93	110	114	119	105	90	23	69	85	71	94	57	103	56	150	0.327667	0.383068	0.393148	0.29183	0.845013	0.517872	0.539649	0.538192	0.848173	0.480084	0.432983	0.744487	0.66656	0.690624	0.355717	0.543419	0.351637	0.535576	0.311586	0.73579	0.475956	-0.154973
ENSG00000163378	EOGT	1730	1516	1522	1126	1425	1200	1605	2010	2162	2232	1768	1478	1289	1267	2182	1852	1231	1683	1192	1857	9.63072	8.64655	8.67885	7.85126	7.38891	6.80346	9.56017	10.7591	15.2274	9.70003	9.70014	11.5706	8.01002	9.28423	11.4128	12.2597	8.14403	9.06343	6.87885	10.0565	0.819688	0.0251859
ENSG00000056586	RC3H2	1494	1640	2434	1868	1878	1816	1939	2167	2464	2232	1872	1842	1969	1605	1828	2083	1271	1688	1712	2339	4.3053	4.89258	6.15833	5.34596	5.0339	5.23233	5.00555	5.07185	7.47502	5.15536	4.71269	5.41401	6.16015	4.85485	6.34173	6.53918	4.20055	4.87205	5.1149	5.96826	0.458063	-0.0621647
ENSG00000178882	RFLNA	156	186	138	114	150	132	107	143	194	227	143	92	82	166	127	198	81	118	168	193	1.69431	2.16994	1.32743	1.21044	1.52413	1.60879	1.03395	1.33703	2.18778	1.91524	1.36993	1.02132	1.11272	1.81738	1.45972	2.31882	0.983179	1.30055	1.88989	1.8846	0.388205	-0.12447
ENSG00000128849	CGNL1	429	362	243	248	230	210	445	401	296	599	235	348	162	418	230	382	256	400	489	394	1.50444	1.28237	0.754358	0.858311	0.756408	0.752018	1.40286	1.14237	1.08585	1.64341	0.735718	1.25981	0.613856	1.48577	0.746232	1.43434	1.02588	1.37226	1.77448	1.25071	0.916	0.0182874
ENSG00000115415	STAT1	2685	2343	4121	2830	3082	2831	2562	3304	4371	4776	3052	2792	2559	2794	2778	3366	2146	2782	2842	4638	16.2304	14.3851	22.0644	16.6191	17.3666	17.34	14.1247	16.0069	27.39	22.3928	16.1693	17.2745	16.5706	17.0963	15.3971	22.3296	14.6407	16.5109	17.5674	25.1193	0.441573	-0.0723999
NewGene_3551	NewGene_3551	1011	1069	632	506	356	316	807	931	758	1004	752	1073	326	652	929	505	309	829	529	1155	8.44018	8.14817	4.9452	3.86906	2.42352	2.34059	6.01473	6.0965	6.5766	6.62933	5.62077	8.54581	2.85229	5.93041	7.24342	4.22259	2.54934	6.97616	4.67949	7.31601	0.979432	-0.005703
NewGene_3550	NewGene_3550	1239	1165	822	659	418	434	979	1344	1138	1283	1261	1693	500	797	1310	825	463	996	804	1558	10.3239	10.8982	6.95087	6.07579	3.77425	4.31325	8.35185	9.22924	11.223	10.0887	11.5476	16.0198	5.63828	8.09439	14.3106	8.0979	5.42054	9.03536	8.15975	12.2029	0.404678	0.177664
NewGene_3555	NewGene_3555	26	35	80	12	19	30	17	10	83	39	143	86	42	70	293	16	38	41	87	11	0.114578	0.29142	0.422478	0.220733	0.072511	0.167786	0.063963	0.063431	0.594764	0.198003	0.799177	0.443478	0.19157	0.581553	1.98526	0.35667	0.346014	0.403606	0.490374	0.211022	0.00624516	1.34546
ENSG00000225526	MKRN2OS	275	179	392	392	247	164	192	209	289	480	273	142	191	369	313	257	163	231	169	161	7.06356	4.67943	8.96147	10.0327	5.98114	4.30576	4.45024	4.3937	7.83173	9.78475	6.26174	3.74477	5.32849	9.68197	7.50694	7.07157	4.76458	5.79009	4.47632	3.73418	0.290145	-0.213393
NewGene_7241	NewGene_7241	50	151	184	119	114	100	153	155	206	165	96	179	189	95	111	157	243	177	143	174	0.304345	0.943799	1.00802	0.721923	0.660133	0.630657	0.847685	0.778295	1.33399	0.795705	0.526942	1.1419	1.27096	0.59632	0.635688	1.03842	1.71652	1.06893	0.916438	0.976319	0.209268	0.294317
NewGene_7246	NewGene_7246	184	118	38	47	81	37	81	48	102	317	27	40	24	220	49	73	49	153	56	142	3.36489	2.10347	0.6467	0.839456	1.34618	0.733787	1.28765	0.670002	1.94988	4.47066	0.410973	0.693762	0.456665	4.01247	0.802645	1.44635	0.968522	2.65435	1.05652	2.25989	0.550518	-0.239784
NewGene_7245	NewGene_7245	4288	3979	4504	3903	3365	3380	3303	4324	5133	6416	3895	3549	2806	3549	4035	3702	2531	4172	3752	5331	27.9026	26.2477	25.843	25.3391	20.4389	22.5663	19.1775	23.1342	35.2741	32.8328	23.1361	23.6851	20.2486	23.3763	24.4265	25.796	19.0661	26.5257	24.7261	31.4442	0.109604	-0.116933
ENSG00000184014	DENND5A	2704	2175	2361	2290	2703	2467	2871	3142	2811	3383	2030	2464	2367	2458	2304	2942	1510	2729	2657	2839	13.8674	11.1832	10.8419	11.5639	13.183	12.9061	13.55	13.2969	15.1219	13.6383	9.36191	13.1707	13.209	12.7278	10.9678	16.365	9.069	13.6667	14.1619	13.2208	0.20726	-0.0829985
ENSG00000179820	MYADM	3210	2871	2701	2313	2886	2601	2403	2683	2868	4157	2347	2153	1874	4161	2693	4525	1458	2878	3092	3187	27.3968	25.0279	20.1314	18.9482	22.8527	22.2129	18.3428	18.1888	25.1004	27.4534	17.7965	18.7132	17.0804	35.6541	21.6702	41.236	14.2227	24.3404	26.5196	24.059	0.800697	0.0318885
ENSG00000162426	SLC45A1	118	120	221	174	172	151	115	156	186	203	189	216	132	156	135	214	73	130	165	195	1.13342	1.1011	1.80632	1.66331	1.48412	1.40651	1.08427	1.1723	1.85728	1.47286	1.53215	2.34355	1.30295	1.43484	1.31924	2.09714	0.75361	1.15385	1.54998	1.68688	0.77219	0.0414628
NewGene_6518	NewGene_6518	488	491	509	437	411	370	308	369	434	506	360	623	684	365	580	460	277	285	467	1105	5.08495	5.32785	4.74007	4.65567	3.93678	4.15208	3.08328	3.10651	4.40274	4.3795	3.59539	6.45676	8.1699	3.94277	5.81544	5.32035	3.3544	2.97772	5.1244	10.1111	0.0955078	0.308897
ENSG00000204116	CHIC1	821	1124	1383	948	1172	1128	1229	1466	1562	1361	1315	1245	1233	986	1278	1167	884	1039	1072	1492	3.0918	4.39268	4.71608	3.55927	4.22492	4.42937	4.23888	4.58329	6.345	4.01601	4.41409	4.82136	5.15789	3.79762	4.48401	4.88906	3.87581	3.88247	4.16677	5.21109	0.86301	0.0172889
ENSG00000137145	DENND4C	970	862	1146	981	939	832	836	1207	1333	1127	693	871	864	1119	974	1333	557	989	1096	1321	6.20872	5.38706	6.3281	5.88455	5.00795	5.40713	4.11023	5.15203	7.57132	6.14729	4.11335	5.84021	5.99509	6.9084	5.84414	8.38766	4.17208	5.79217	6.486	7.80936	0.951208	-0.00584594
ENSG00000104756	KCTD9	1810	1723	2123	1804	1959	1881	1782	2362	2145	2702	1871	1932	1931	1888	1951	1932	1550	1956	1914	2164	13.5894	13.0613	14.2001	13.3418	13.774	14.3876	12.001	14.412	16.7617	15.8176	12.4959	14.8854	15.7183	14.4265	13.5539	15.5015	13.2614	14.3188	14.8108	14.7415	0.928232	-0.0048361
ENSG00000001561	ENPP4	1510	1448	2246	1780	2032	2026	2142	2400	2649	2198	1888	2039	1953	1417	2013	1810	1376	1706	1397	1958	8.23504	7.97936	10.8609	9.57995	10.4137	11.3017	10.5044	10.6324	15.1216	9.37784	9.20216	11.4655	11.5593	7.83309	10.1577	10.5599	8.58407	9.08944	7.88184	9.67454	0.222679	-0.138282
ENSG00000159128	IFNGR2	1877	1646	1501	1464	1415	1234	1620	1603	1574	2981	1302	1400	1131	2171	1360	1388	1209	1881	1747	1743	21.8936	19.1419	15.2847	16.5881	15.3307	14.4132	18.9779	14.9594	20.04	27.9253	13.37	16.4802	14.1782	25.4096	14.8015	17.3949	15.7986	21.1295	20.9968	19.8688	0.621403	-0.0526651
ENSG00000112964	GHR	1036	1042	1034	777	823	787	1069	1122	954	1202	976	1021	738	1332	1195	1272	774	892	1066	973	5.76347	5.85503	5.09578	4.26602	4.3007	4.51404	5.44917	4.97976	5.64212	5.26975	4.84932	5.85277	4.46195	7.50829	6.1517	7.63285	4.91987	4.84434	6.17621	4.89819	0.149058	0.130713
ENSG00000122912	SLC25A16	477	430	504	435	519	448	676	739	633	675	504	571	495	476	655	670	477	421	794	655	2.07189	1.81699	1.9764	1.84749	2.01318	1.95226	2.68575	2.39148	2.87643	2.10578	1.77203	2.40861	2.28463	1.98991	2.84409	2.98325	2.18191	1.65833	3.54674	2.40707	0.243223	0.127835
ENSG00000253251	SHLD3	70	73	80	76	89	51	87	81	90	139	87	82	52	86	52	55	69	83	89	74	1.10253	1.05872	1.00645	1.08452	1.30496	0.799408	1.1113	0.940798	1.34858	1.55675	1.14646	1.20953	0.799772	1.39612	0.685279	1.00893	1.12506	1.15497	1.32123	0.960814	0.471937	-0.103988
ENSG00000253250	C8orf88	39	78	46	42	64	50	86	99	77	97	40	101	71	99	81	64	59	70	54	69	1.10462	2.21399	1.14901	1.14895	1.68984	1.44597	2.17583	2.27101	2.27602	2.14827	0.995812	2.94343	2.15855	2.82009	2.12195	1.91409	1.89078	1.93066	1.57545	1.75417	0.417474	0.160563
ENSG00000154065	ANKRD29	405	453	333	321	344	418	432	505	521	608	450	409	304	678	381	483	245	408	591	636	3.45698	3.68002	2.56072	3.61661	2.92493	3.76941	3.42375	3.43992	4.90094	4.00083	3.3721	3.51876	3.23113	5.84117	3.29263	4.36489	2.28176	3.22529	5.45256	5.12024	0.273027	0.132274
ENSG00000117477	CCDC181	47	57	63	56	48	68	35	35	78	126	56	69	54	80	49	63	32	55	52	82	0.630809	0.813738	0.757185	0.778697	0.615256	0.948951	0.423193	0.383813	1.10247	1.32881	0.67231	0.982508	0.789645	1.08585	0.599112	0.918649	0.477253	0.723085	0.739783	0.983831	0.896659	0.0245
ENSG00000120519	SLC10A7	183	173	211	161	145	199	162	177	240	231	158	158	199	259	169	189	122	161	245	226	1.35851	1.30725	1.42385	1.22334	0.969732	1.55541	1.14826	1.0466	1.97651	1.24976	0.987655	1.19877	1.67187	1.85305	1.1341	1.66356	1.01042	1.25877	1.82477	1.75202	0.548991	0.0678277
ENSG00000155330	C16orf87	732	714	955	795	926	886	955	1194	975	1248	1243	1072	901	909	1051	877	641	933	863	1188	6.13956	6.36303	6.41407	6.50066	6.57195	6.97047	6.60589	7.42136	7.59472	8.2481	8.42958	8.14642	8.55703	7.67444	7.01839	6.877	5.97562	7.46608	7.10823	8.3927	0.171335	0.121184
ENSG00000037749	MFAP3	355	471	648	498	575	548	408	545	783	366	404	323	478	380	550	561	311	430	469	507	3.25524	4.30576	5.25677	4.32628	4.73815	4.98808	3.34898	3.88095	7.39767	2.51125	3.26448	2.91882	4.57078	3.45896	4.46157	5.53507	3.24916	3.87156	4.25549	4.07568	0.230096	-0.184219
NewGene_4204	NewGene_4204	140	148	119	181	117	119	166	129	107	232	146	126	104	206	168	80	167	127	111	118	2.27527	2.36899	1.6438	2.78236	1.70348	1.91731	2.33201	1.64547	1.80527	3.00041	2.02851	2.06658	1.74758	3.36455	2.42115	1.44745	2.9895	1.92485	1.79979	1.65914	0.988988	0.00260781
ENSG00000170522	ELOVL6	173	132	167	85	113	143	130	130	142	235	78	92	91	214	112	130	57	178	162	207	0.759713	0.61963	0.596971	0.342701	0.427164	0.596249	0.45671	0.424183	0.582424	0.727528	0.272202	0.371216	0.45087	1.02324	0.432039	0.546087	0.268967	0.82648	0.718452	0.740462	0.643675	-0.0846938
ENSG00000170525	PFKFB3	1039	1066	1185	905	911	924	869	1246	1285	1473	1154	858	915	1172	955	1370	609	1077	1340	2333	5.97022	6.30519	6.14385	5.2614	4.88393	5.44439	4.5028	5.8055	7.73679	6.71889	5.87968	5.14975	5.63209	6.83819	5.07167	8.41388	4.06497	6.12376	7.95624	12.1769	0.190925	0.153528
ENSG00000198551	ZNF627	337	409	469	387	439	368	415	475	458	568	426	447	409	457	358	443	286	429	472	446	3.0393	4.19105	4.26668	4.15335	4.26513	3.35699	3.51749	3.6036	4.42009	3.96627	3.76566	4.31719	4.10732	4.13554	3.08425	4.23799	3.42762	3.73876	4.50689	3.99961	0.744722	0.0213804
ENSG00000198556	ZNF789	264	200	219	229	196	183	207	247	258	301	293	312	224	244	224	214	193	192	296	328	3.28452	2.72397	2.48035	2.77858	2.44298	2.6414	2.40382	2.61879	3.54288	2.87912	3.84626	4.28066	3.3649	3.25381	2.78967	2.82859	2.77663	2.67471	3.82724	4.0852	0.0298959	0.204509
ENSG00000198554	WDHD1	83	95	113	101	104	95	88	108	106	144	82	71	86	115	60	123	40	99	95	119	0.350562	0.405877	0.420881	0.417842	0.409598	0.408349	0.331771	0.368918	0.466981	0.47525	0.306585	0.306665	0.39315	0.489784	0.23436	0.554355	0.193612	0.405597	0.414256	0.454732	0.192396	-0.166039
ENSG00000075223	SEMA3C	7810	8908	10893	8381	5504	5998	6151	8029	7535	9724	8207	6025	8005	12147	6606	7978	6501	8604	13818	12597	38.3053	44.1402	47.3611	40.5876	25.3641	30.0845	27.1168	31.9889	38.7025	37.3236	35.981	30.4545	42.6239	60.4265	29.9776	41.9016	36.5002	41.2353	70.149	56.0303	0.0535456	0.25865
ENSG00000164542	KIAA0895	280	266	385	302	230	269	228	373	359	305	346	294	297	277	341	330	202	327	269	375	2.06398	1.63094	2.31155	1.84462	1.34207	2.02094	1.26353	1.93523	2.48178	1.49921	1.97292	1.95929	1.99268	1.93704	2.11248	2.26914	1.44975	2.04221	1.66999	2.43335	0.31655	0.0973351
ENSG00000160714	UBE2Q1	1652	1517	1576	1482	1490	1389	1712	1881	1786	2152	1556	1579	1489	1659	1497	1496	1223	1527	1735	1827	13.0565	12.1093	11.04	11.5523	11.0636	11.2282	12.1647	12.0712	14.7679	13.3022	10.9904	12.8608	12.7686	13.2895	10.9433	12.6463	11.0522	11.7848	14.1911	13.0816	0.70353	-0.0160259
ENSG00000160712	IL6R	473	363	265	225	300	313	303	291	299	417	176	373	336	395	279	381	214	390	245	400	2.04473	1.57883	1.00336	0.951705	1.22987	1.40324	1.16954	1.00861	1.34374	1.40155	0.674692	1.64598	1.56016	1.71444	1.10507	1.75867	1.04871	1.63196	1.08655	1.56381	0.81673	0.0346985
ENSG00000160710	ADAR	3334	2731	3295	3240	2924	3021	2839	3635	4222	4199	2424	2748	2679	2949	2908	3923	1766	2856	3575	3907	12.905	10.6832	11.2617	12.4228	10.6097	12.1071	9.9623	11.3543	17.2931	12.6821	8.37792	11.0071	11.1558	11.5317	10.4601	16.4463	7.87093	10.7674	14.2726	13.5708	0.135431	-0.111335
ENSG00000136950	ARPC5L	1234	1221	1659	1471	1283	1391	1623	1791	1287	1805	1541	1343	1251	1197	1222	1156	1082	1452	1190	1514	21.6747	21.7664	24.9022	24.9906	21.5922	23.8114	25.0325	24.5286	23.5113	24.5005	23.7194	23.1311	22.6638	20.3472	19.5245	17.8888	20.4721	23.8054	20.9267	23.3753	0.196883	-0.109496
ENSG00000096080	MRPS18A	1194	1340	1315	1117	1262	1157	1226	1212	1096	1558	1492	1135	1057	1211	1229	976	831	1214	1090	1204	28.9653	32.6555	28.2143	26.6231	28.5724	28.3901	26.6588	24.0126	27.7074	29.5047	32.1437	28.2154	27.7232	29.5948	27.4389	25.4025	22.9811	28.7467	27.2623	26.4412	0.522655	-0.0550579
ENSG00000175467	SART1	1644	1258	1401	1543	1120	990	1344	1641	1272	1551	1290	1284	1056	1333	1124	1536	751	1424	1473	1673	12.6918	9.79518	9.56865	11.7319	8.12294	7.79811	9.30752	10.2656	10.2495	9.3718	8.8975	10.2106	8.828	10.4081	8.01572	12.6564	6.63828	10.7143	11.7421	11.6784	0.661043	-0.0342868
NewGene_3950	NewGene_3950	3502	3335	4362	3406	3247	3075	3486	4094	4869	4207	3467	3542	3340	3352	3507	4353	2496	3238	3754	4263	11.0669	10.1753	11.845	9.98112	9.32502	9.30204	9.76913	9.98067	15.4056	9.88896	9.49606	11.2642	10.7978	10.2399	9.77928	14.5823	8.80217	9.30335	12.5034	11.9929	0.734553	-0.0208493
ENSG00000175463	TBC1D10C	122	27	80	54	26	37	41	55	45	119	25	36	9	41	20	22	35	93	23	37	1.85446	0.373015	1.07676	0.8161	0.340598	0.525318	0.524819	0.648715	0.714031	1.30985	0.299693	0.522186	0.135557	0.578216	0.242335	0.330187	0.556886	1.37729	0.322334	0.512202	0.0375821	-0.712716
ENSG00000105402	NAPA	3749	3467	4428	3976	4140	3620	4077	5013	4132	5055	4625	3912	3758	3473	4048	3926	2662	3789	4151	4579	52.613	48.9326	54.5239	57.1037	56.134	51.9184	53.1557	60.522	63.0543	56.558	57.9782	58.5001	58.4622	49.9502	55.1639	60.5275	43.6074	52.0701	59.8104	58.6598	0.643742	-0.0270304
ENSG00000105401	CDC37	6520	6148	7275	6582	5646	4989	6226	8092	5483	6778	6665	6514	5128	5591	6176	6347	4588	6083	6374	6991	106.996	102.411	105.008	106.422	86.4546	83.5282	92.5637	107.998	94.6845	87.2051	97.8021	111.339	90.9317	92.8004	93.5334	110.986	86.9222	97.0815	109.636	104.633	0.915313	-0.00716942
ENSG00000105404	RABAC1	2131	1717	1612	1689	1404	1321	1777	1700	1447	3800	1736	1702	1321	2522	1450	1581	1356	2006	1808	1862	66.0114	53.9937	44.5693	51.7893	40.9607	41.9979	49.8848	42.6832	46.8429	93.0269	49.0799	54.5192	44.7632	80.6047	41.5255	53.011	48.1088	60.6472	58.0151	52.5078	0.995133	0.000772758
NewGene_2985	NewGene_2985	948	913	575	522	738	651	418	365	647	966	1136	1397	812	1287	974	1223	428	1779	1594	1160	10.9789	11.1208	5.40586	5.90758	8.07405	7.52649	4.91453	3.34555	8.18315	8.98677	11.801	18.4645	10.3013	14.9604	9.10298	14.1518	5.37119	19.8412	18.9444	11.7081	1.21052e-05	0.840291
ENSG00000105409	ATP1A3	7859	8107	10851	8606	9959	9637	10306	15888	7587	5929	8123	7582	8138	3273	8465	6504	5013	5673	7143	6244	54.9067	57.0763	66.8978	58.6834	65.5985	68.3914	64.0256	89.456	54.9339	32.2783	50.7845	54.6341	61.928	23.3417	53.9044	49.2218	40.4872	38.3313	51.6691	38.9629	0.0139186	-0.446533
ENSG00000181218	HIST3H2A	445	447	429	459	294	221	437	398	355	932	303	136	449	582	452	411	469	506	367	232	12.6092	12.7846	10.7644	12.8251	7.8097	6.40088	11.129	9.15464	10.5116	20.6602	7.66645	3.96422	13.8148	16.7015	11.8416	12.4537	15.2084	13.9868	10.7637	5.93657	0.911744	-0.0257674
ENSG00000108639	SYNGR2	4768	4428	5823	5066	5022	4895	4340	5935	4840	5855	6313	5364	4772	4712	6056	5899	3420	5556	4881	7084	62.7618	58.3513	74.954	65.8018	59.9906	65.4789	51.3878	62.2199	73.1719	59.4706	73.7047	72.7063	67.9847	62.8372	74.5701	83.9884	51.1239	70.6511	65.544	92.6596	0.0518192	0.142889
ENSG00000132182	NUP210	366	338	519	452	347	337	285	644	414	365	412	457	323	312	447	543	295	388	348	458	1.28943	1.20344	1.62224	1.57039	1.14811	1.21403	0.902256	1.84422	1.52456	1.00635	1.2988	1.66155	1.23387	1.11266	1.45601	2.04676	1.1887	1.33357	1.26938	1.46063	0.760292	0.0391723
ENSG00000014919	COX15	1753	1765	2282	1860	1919	1988	1899	2312	1766	1759	1920	2072	1841	1524	1942	1811	1183	1622	1913	2125	16.7968	17.2439	19.4322	17.625	17.2449	19.4777	16.435	18.0453	17.8164	13.2292	16.3093	20.4476	19.2298	14.7332	17.2466	18.7668	12.8676	15.2877	19.1148	18.502	0.596477	-0.0491978
ENSG00000135205	CCDC146	241	198	156	97	127	140	186	172	286	369	201	207	116	269	225	200	127	158	224	200	1.82973	1.51962	1.05033	0.728451	0.897326	1.08488	1.26642	1.05795	2.27106	2.19087	1.36477	1.62131	0.952941	2.07287	1.5786	1.61809	1.10513	1.17222	1.76161	1.37403	0.716706	0.0618508
ENSG00000131981	LGALS3	3569	2743	2837	3305	3769	3353	3317	3770	3359	6940	3220	2939	2671	3490	2233	2442	2287	3757	3608	3995	79.0799	61.39	55.7555	72.2396	78.4518	75.9374	66.0475	67.8151	77.8394	120.202	63.7485	67.1383	64.1764	78.3198	45.7466	57.8087	57.9234	81.2561	82.7726	80.1647	0.103695	-0.18367
ENSG00000188021	UBQLN2	1847	1853	2372	1944	2023	2053	1769	2534	2235	2597	2265	2119	2079	1657	2255	2116	1221	1851	2044	2530	11.0791	11.2267	12.61	11.5034	11.3995	12.5925	9.53843	12.3427	14.0266	12.1861	12.1408	13.0957	13.5315	10.0746	12.5123	13.5736	8.37502	10.8449	12.6839	13.7463	0.898899	-0.00973706
ENSG00000188026	RILPL1	2576	2556	3624	3121	2762	2607	2848	3722	2780	3237	3007	2787	2532	2051	2938	2600	1891	2366	2540	3142	21.4506	21.9439	28.1316	27.5332	22.9656	22.6689	21.5541	26.2352	24.8329	21.7246	23.2396	25.2698	24.1953	17.869	22.423	23.9736	19.6513	19.5273	20.7402	23.4076	0.11023	-0.135794
NewGene_4975	NewGene_4975	166	118	132	134	121	139	223	171	189	334	95	193	114	271	123	167	106	193	196	216	0.73365	0.524791	0.516202	0.582683	0.52714	0.62827	0.884333	0.613246	0.870308	1.15262	0.37145	0.874788	0.542399	1.20997	0.500227	0.786875	0.533599	0.831165	0.893365	0.862386	0.826168	0.0377759
NewGene_4976	NewGene_4976	1546	1516	1151	1190	1161	1042	1637	1273	974	2037	1321	1288	1059	1621	1033	883	1144	1629	1296	1513	36.2236	35.8736	23.8982	27.496	25.5431	24.958	34.4651	24.2158	23.8585	37.3239	27.66	31.0812	26.918	38.4826	22.3748	22.1196	30.65	37.2564	31.3995	32.101	0.981664	0.00294814
ENSG00000240747	KRBOX1	29	32	12	9	68	19	44	49	47	55	25	73	5	68	31	33	40	19	50	53	0.919198	0.555767	0.31269	0.23557	2.26607	0.664468	1.36682	1.46706	1.68411	1.51371	0.741363	2.74262	0.048956	2.4884	0.937611	1.2634	1.62023	0.584082	1.73394	1.69075	0.586681	0.205816
ENSG00000084652	TXLNA	1262	1070	1267	1019	1062	961	1086	1405	1260	1669	1167	1159	967	1158	947	1402	744	1326	1372	1324	6.47276	5.62718	5.84977	5.236	5.20481	5.00966	5.05749	5.94294	6.81325	6.76145	5.38698	6.21471	5.44275	6.09292	4.56694	7.81166	4.39203	6.66448	7.40093	6.22668	0.840891	0.0112726
ENSG00000172167	MTBP	49	52	91	43	49	38	35	66	68	51	36	65	54	68	69	99	19	57	63	81	0.399432	0.434108	0.662345	0.340365	0.372138	0.313161	0.266565	0.443108	0.590647	0.330852	0.268775	0.540819	0.483618	0.602269	0.531625	0.87494	0.174646	0.44765	0.539562	0.604572	0.279966	0.217707
ENSG00000172164	SNTB1	1093	1119	1313	1025	1274	1137	1199	1413	1686	2058	973	1161	1237	1203	1076	1193	848	1502	1264	1947	5.92106	6.67684	6.49109	5.44514	6.58886	6.24624	6.15755	6.43935	9.83439	8.68301	4.46355	6.25403	7.34877	6.51736	5.338	7.37303	5.17949	8.09529	7.08047	9.82996	0.768516	-0.0275958
ENSG00000148384	INPP5E	608	330	448	427	390	367	480	568	533	638	501	594	388	496	487	666	320	499	508	509	4.54076	2.48875	2.96608	3.14325	2.73304	2.8031	3.22058	3.44905	4.16942	3.72886	3.34585	4.57562	3.1436	3.75187	3.36803	5.31951	2.73639	3.63906	3.92284	3.4417	0.160295	0.128793
ENSG00000020426	MNAT1	769	818	983	906	1044	997	969	1058	948	1318	981	960	843	913	802	781	788	923	824	1092	7.79405	8.15309	8.66441	8.85171	9.97523	9.81414	8.49375	8.56261	10.2967	9.92113	8.93587	9.52435	9.3753	9.12739	7.61087	8.04178	8.84597	8.67238	8.61838	9.69349	0.478679	-0.0599869
ENSG00000101871	MID1	779	513	685	509	456	348	860	729	728	817	684	605	403	654	821	812	410	630	767	789	3.25234	2.16237	2.4062	2.11168	1.81607	1.47849	3.14764	2.32351	2.98681	2.52121	2.39388	2.50593	1.74172	2.63201	2.98215	3.45461	1.83355	2.49637	3.13178	2.8139	0.404082	0.104824
ENSG00000172785	CBWD1	1279	1224	1148	954	983	1014	1080	933	1036	1502	1062	1083	930	1247	749	828	660	771	745	910	20.1421	17.9935	16.3065	13.2218	14.6694	16.0479	15.4078	11.6012	16.3304	17.0667	13.1432	16.0398	15.4758	19.8412	10.3816	13.5331	11.4406	10.9525	11.0478	11.6078	0.036398	-0.235537
NewGene_3611	NewGene_3611	1143	1168	1118	877	998	909	1007	1093	1366	1913	1232	1135	882	1134	1228	1208	899	1233	1443	1561	5.06873	4.84663	3.89982	3.87965	3.83058	3.84646	3.9299	3.73964	6.13044	6.98557	4.47119	4.7501	4.99809	5.75706	4.57957	5.61059	5.17112	4.9567	6.36009	5.79015	0.109499	0.126066
ENSG00000172780	RAB43	328	191	21	26	327	246	317	380	383	471	90	89	205	255	13	412	140	299	402	12	2.03243	1.09319	0.101919	0.2531	1.74198	1.42651	1.83247	1.75051	2.28553	2.09101	0.453821	0.852988	1.29372	1.51748	0.067371	2.50246	0.905461	1.72828	2.35831	0.060476	0.50145	-0.386278
ENSG00000144724	PTPRG	1500	1686	1420	1339	1479	1483	1381	1796	1840	1664	1249	1474	1585	1939	2197	2635	812	1370	1329	1724	4.21964	4.78934	3.65308	3.78284	3.95182	4.29556	3.51265	4.156	5.54203	3.65932	3.13884	4.32312	4.8754	5.55728	5.75792	8.01249	2.6362	3.78941	3.86986	4.40556	0.37355	0.11652
ENSG00000196923	PDLIM7	4395	4050	3809	3711	2251	2226	3915	4127	1694	3060	3565	3509	3071	3958	2945	4062	2846	3977	3061	5416	93.047	88.6999	74.5165	77.4603	44.8846	49.4573	77.6196	74.9345	34.9799	46.9066	68.5891	77.6409	72.7257	85.8136	57.9631	94.9641	72.0341	82.259	64.9891	105.46	0.226705	0.184735
ENSG00000174780	SRP72	2225	2115	2246	1770	2072	2136	2070	2482	2434	3158	2083	2347	2099	2559	2151	2468	1603	2471	2234	2833	14.4715	13.8367	12.5773	11.2144	12.3969	14.1029	11.7409	13.0434	16.5005	15.7988	11.8999	15.8342	14.6445	16.8028	12.9321	17.9093	11.9833	15.5833	15.0014	16.6261	0.0890081	0.0816374
ENSG00000173786	CNP	2371	1910	2319	2144	2647	2556	2132	3183	3403	3103	2698	2004	1815	1708	2053	2219	1331	2199	2623	2806	11.5302	9.45066	11.9695	10.3642	12.9768	14.2037	9.42879	12.8352	17.781	11.932	11.8221	10.2561	9.60716	8.48976	9.23704	12.3768	7.51619	10.4907	13.5454	12.7969	0.0345976	-0.20267
ENSG00000117877	CD3EAP	114	67	75	106	75	60	90	108	48	132	95	107	99	88	64	58	94	33	95	119	0.91667	0.520939	0.525808	0.826473	0.561328	0.473198	0.642205	0.671948	0.380554	0.808349	0.707414	0.849045	0.849641	0.694888	0.470438	0.555813	0.997	0.243168	0.908271	0.889609	0.76465	0.0644138
ENSG00000116473	RAP1A	3308	3206	3056	3252	3467	3235	3369	3349	3280	4974	2852	3049	2800	4047	2973	2793	2267	3609	3290	3565	17.2418	16.8258	13.9832	16.6361	16.7368	17.8217	15.861	14.5274	18.4985	20.1549	15.6984	17.5234	15.887	21.3317	14.1872	17.7131	13.6442	18.7121	18.2065	19.0737	0.336973	-0.0711314
ENSG00000112996	MRPS30	948	1104	1201	1088	1074	997	1182	1364	1131	1035	949	937	973	805	1105	990	802	858	810	960	14.328	16.8557	16.0853	16.2266	15.2558	15.4083	16.0555	16.7476	17.8955	12.2358	12.8167	14.6018	15.9579	12.3384	15.4531	16.0018	13.8559	12.6645	12.6726	13.1502	0.0421196	-0.199508
ENSG00000112992	NNT	11413	13055	21188	14953	15686	15596	15937	22087	16160	13779	15473	15120	15877	9153	15684	13417	11066	12045	13224	13673	57.943	67.1807	81.5329	70.1942	68.5523	80.2526	75.0041	89.4786	72.8415	46.4331	70.6254	70.9164	78.8246	47.5798	70.554	69.8803	65.4485	55.0757	64.889	60.0823	0.212087	-0.166707
ENSG00000116478	HDAC1	1026	808	1030	1078	1045	931	890	1172	1050	1010	1057	920	991	627	954	762	674	919	970	1042	12.2515	9.74253	10.8995	12.7031	11.7289	11.372	9.5546	11.3628	13.1222	9.43411	11.2838	11.3193	12.8382	7.58883	10.5366	9.72341	9.20283	10.7191	11.9909	11.2716	0.327121	-0.101401
ENSG00000247626	MARS2	243	267	405	279	288	269	277	491	317	314	317	314	292	199	342	293	171	229	254	335	2.03954	2.26214	3.01137	2.31163	2.26937	2.30883	2.09258	3.34793	2.78565	2.06385	2.37958	2.71243	2.66279	1.68963	2.65841	2.62511	1.63857	1.87396	2.20198	2.54449	0.326033	-0.125051
ENSG00000151150	ANK3	4067	4598	6959	5200	5308	4922	5558	7825	6325	4571	5524	5155	4826	3246	6623	6671	3124	4645	4763	6414	23.5857	25.0796	29.132	23.261	22.2262	27.8361	26.078	29.5114	35.2631	20.998	28.1121	33.2418	27.7103	19.612	34.0803	39.182	19.6027	23.684	21.2086	27.5878	0.639631	-0.0615344
ENSG00000099864	PALM	2127	1446	902	1148	879	727	1421	1244	1091	2993	611	1251	630	2700	755	2170	745	2046	2146	1616	20.3845	13.7595	7.53748	10.6146	7.75129	6.99141	12.1772	9.47009	10.6742	22.1077	5.12227	12.2689	6.39799	26.3829	6.61088	21.9474	8.00079	18.6165	20.7904	13.7087	0.576911	0.141318
ENSG00000099860	GADD45B	599	549	557	738	523	470	568	709	522	1037	512	709	475	598	650	799	567	635	692	698	11.1418	10.3101	9.32764	13.5301	9.31437	8.88548	9.47243	10.7104	10.1474	15.2627	8.48623	13.5658	9.56625	11.4027	11.4526	16.1527	12.3279	11.5623	13.3277	11.9038	0.297163	0.105117
ENSG00000106245	BUD31	1034	873	765	825	925	678	1058	851	765	1648	834	864	803	1153	850	708	681	1142	844	1082	24.4783	20.7723	16.1026	19.224	20.5804	16.389	22.6273	16.3188	19.0082	30.6305	17.8544	21.1826	20.5416	27.934	18.6974	17.8214	18.4869	26.4131	20.7145	23.1624	0.894819	0.0151094
ENSG00000106244	PDAP1	3004	2860	3120	3022	2871	2519	3270	3450	2925	4246	3341	2875	2886	3265	2948	2863	2285	3491	2996	3893	30.0315	29.0896	28.5454	29.8023	27.2223	25.9673	29.8256	28.0518	31.1349	33.0994	30.1377	29.8418	31.3502	33.9343	27.5013	31.1065	26.0644	34.158	31.4647	36.2544	0.294318	0.0545934
ENSG00000072210	ALDH3A2	3052	2750	3245	2484	2774	2557	2845	3380	2884	3829	2515	2871	2593	3243	2582	3279	1737	2962	2716	3580	20.1193	18.3281	18.8267	16.2024	17.0473	16.9958	16.7294	17.964	19.766	19.895	14.6666	19.1981	18.3435	22.5516	15.5724	23.1914	12.9455	19.3108	18.7039	21.5841	0.667654	-0.0218166
ENSG00000266173	STRADA	696	608	534	549	517	433	516	711	724	860	586	639	471	553	553	652	433	592	697	751	8.34006	6.95128	5.29594	6.11596	5.41218	5.78813	5.59262	6.64138	8.91811	7.6623	6.49773	7.65404	5.94183	6.45266	5.96838	8.11473	5.73413	6.45441	8.14828	7.46199	0.732069	0.0236046
ENSG00000100836	PABPN1	2338	2149	2182	2264	1887	1883	2229	2477	2357	3425	2333	2465	1785	2143	2503	2285	1746	2482	2635	2658	25.1237	22.1476	20.5406	23.8649	19.0037	19.9983	20.2706	20.2144	24.454	26.9103	23.3166	25.2127	21.6387	23.2719	24.5846	25.0473	22.3845	25.3892	27.6275	24.5441	0.20924	0.0703771
ENSG00000153790	C7orf31	135	74	75	69	82	53	92	90	125	149	37	88	39	229	90	122	72	97	98	103	1.05255	0.571833	0.769351	0.573475	0.593335	0.538048	0.643438	0.578063	1.05445	0.913343	0.244727	0.752887	0.307616	2.02658	0.669905	1.15481	0.614372	0.75203	0.913345	0.753942	0.610252	0.125549
NewGene_8260	NewGene_8260	1006	1050	181	134	164	145	673	623	245	311	192	528	134	1387	1000	930	487	251	511	542	19.9861	21.4919	1.96893	1.9123	1.90723	1.67113	11.1434	9.4389	3.38569	3.31374	2.46941	10.0936	2.03472	28.5171	18.7339	20.3754	11.2719	3.2184	9.46213	9.15822	0.337636	0.447934
NewGene_8266	NewGene_8266	90	72	102	73	92	29	105	96	89	138	115	129	80	114	103	132	62	81	137	151	0.864309	0.664802	0.803276	0.723951	0.798324	0.32884	0.899992	0.802709	0.880803	1.01387	0.964224	1.30449	1.16012	1.12559	0.963581	1.43802	0.662934	0.791072	1.32574	1.42824	0.0131042	0.390745
NewGene_8267	NewGene_8267	72	85	91	88	49	77	97	79	113	141	94	138	96	79	104	102	127	90	56	104	0.5555	0.6642	0.625472	0.671324	0.350026	0.604738	0.673566	0.49544	0.911333	0.855541	0.650278	1.09796	0.807171	0.620522	0.746323	0.839895	1.12355	0.680514	0.448427	0.730471	0.143946	0.270405
ENSG00000113643	RARS	1170	1136	1224	1239	1141	1091	1159	1372	1267	1553	1247	1248	1112	1341	1123	1141	946	1125	1101	1338	13.8275	13.566	12.8256	14.4472	12.6706	13.2516	12.3167	13.5844	15.7649	14.6743	13.1746	15.1985	14.2591	16.0668	12.2811	14.441	12.7849	12.9919	13.46	14.3313	0.978118	0.00148707
ENSG00000113649	TCERG1	1033	956	1199	1044	968	956	991	1166	1302	1399	1375	1265	960	1094	1279	1302	829	1000	1228	1473	5.91553	5.42988	6.09965	5.93807	5.20319	5.53592	5.13864	5.3095	8.01073	6.16868	6.95833	7.49361	5.90764	6.44137	6.69419	8.16372	5.43617	5.60159	7.21288	7.81457	0.00562028	0.169708
ENSG00000113648	H2AFY	2589	2514	3286	2979	3068	2658	2600	3200	2969	3840	3158	2928	2553	2707	2898	2689	1951	2954	2881	3585	34.4402	33.9568	39.0812	39.4035	38.575	36.1505	30.8489	34.8758	41.46	40.1298	37.6568	40.2633	37.5009	36.7031	35.8822	37.8436	30.112	38.8873	39.9616	43.3159	0.973958	-0.00188136
ENSG00000169432	SCN9A	164	138	145	128	161	130	106	165	257	184	117	115	98	232	141	255	91	114	172	169	0.42565	0.361329	0.334463	0.325961	0.3913	0.38565	0.246247	0.34605	0.776708	0.373852	0.271279	0.307087	0.27475	0.608391	0.37408	0.718671	0.268956	0.28742	0.460599	0.420008	0.93259	-0.0141648
ENSG00000169436	COL22A1	884	339	259	280	145	113	191	346	692	722	290	809	392	437	346	2036	63	543	608	2108	3.92483	1.5353	0.911843	1.15031	0.580389	0.455805	0.684275	1.16337	2.94433	2.38718	1.0294	3.77139	1.75527	1.83013	1.27806	9.035	0.280176	2.11365	2.59016	7.79801	0.0362657	0.954426
ENSG00000169439	SDC2	4059	3503	1609	1555	2623	2289	3614	3224	3076	7353	1476	2725	1621	7192	2243	4476	2067	4551	4397	4074	27.4565	23.8885	9.62102	10.3549	16.6379	15.8548	21.9538	17.7027	21.7255	38.8424	8.90232	19.057	11.8685	49.2741	14.0087	32.3708	15.9579	30.0458	30.7857	24.9573	0.505833	0.163613
ENSG00000111647	UHRF1BP1L	1351	1456	1658	1238	1328	1170	1549	1874	1859	1906	1229	1368	1324	1236	1327	1599	868	1148	1254	2050	6.99039	7.33463	7.57603	6.05343	6.40343	6.09573	6.99261	7.71781	9.88568	7.39755	5.46713	7.04889	7.221	6.2953	6.25537	8.60259	5.20456	5.60661	6.58789	9.46829	0.0866304	-0.132326
ENSG00000111641	NOP2	482	396	560	462	482	398	461	625	501	539	21	398	27	340	501	542	10	423	515	556	4.0577	3.79778	4.19051	3.88582	3.89603	3.39015	3.72965	4.83442	5.00538	3.57297	0.14619	4.03355	0.508453	3.06134	3.96012	4.92281	0.114268	3.81328	5.27802	4.31957	0.246686	-0.569382
ENSG00000111640	GAPDH	125402	133042	166970	144308	114420	107369	157958	156999	93747	123523	141412	132709	144401	128682	107657	88985	115072	99881	96250	122451	1810.21	1925.8	2126.27	2074.85	1575	1586.9	2064.85	1839.2	1408.47	1411.01	1842.3	1986.18	2235.89	1882.72	1434.1	1361.65	1905.96	1409.85	1419.28	1586.45	0.567353	-0.0808587
ENSG00000111642	CHD4	3140	2913	4123	3651	3433	3330	3746	4936	3952	4080	2735	3620	2768	2473	3064	3820	1767	3376	3866	4193	12.5321	16.2779	17.0942	14.1962	13.1981	13.8378	13.6996	16.6522	17.3954	18.7455	10.9519	15.1671	12.0127	11.0418	11.5098	16.5519	8.04397	13.4887	18.6464	15.2538	0.0408097	-0.182282
ENSG00000142494	SLC47A1	669	479	505	441	496	451	522	634	626	691	289	462	309	378	459	626	288	535	512	746	5.21302	3.74097	3.45839	3.40845	3.67634	3.64952	3.63555	4.14644	5.18096	4.20871	2.00133	4.06736	2.60698	3.14416	3.2971	5.22666	2.71501	4.04147	4.15211	5.34576	0.0720482	-0.209358
ENSG00000114030	KPNA1	2515	2605	3873	2812	3007	2695	2505	3443	3109	3252	2944	2774	2756	2431	2787	3281	1882	2685	2608	3830	9.41525	9.84246	12.8115	10.3635	10.556	10.2485	8.46306	10.4536	12.2868	9.46645	9.78028	10.6359	11.1737	9.29547	9.61872	13.1821	8.02594	9.75735	10.1018	12.8982	0.691066	-0.0313205
ENSG00000073331	ALPK1	314	221	177	165	187	121	194	256	201	194	152	237	149	305	156	316	176	212	288	288	1.71391	1.14268	0.73342	0.760698	0.838706	0.580009	0.936486	1.03163	1.25388	0.761489	0.633673	1.14292	0.756293	1.44768	0.776722	1.58356	0.941609	0.971167	1.39576	1.392	0.157133	0.222999
ENSG00000156313	RPGR	159	164	206	171	154	146	196	257	277	263	198	226	155	280	257	234	129	146	219	195	1.2246	1.3464	1.41544	1.2888	0.978776	1.1873	1.42192	1.61149	2.22286	1.77657	1.21852	1.84355	1.18535	2.3283	1.71371	1.78547	1.18759	1.02574	1.83006	1.37475	0.353601	0.115612
ENSG00000039537	C6	196	191	57	34	59	48	176	103	56	153	16	163	45	263	32	94	70	128	65	136	1.35238	1.3323	0.348776	0.22816	0.383443	0.338237	1.09234	0.57449	0.400193	0.826784	0.096634	1.1582	0.338049	1.84608	0.20126	0.692945	0.550196	0.860812	0.463391	0.853638	0.946494	-0.0270318
ENSG00000109220	CHIC2	238	254	243	212	196	223	272	281	207	431	218	225	220	342	279	230	137	294	256	292	5.05745	5.4476	4.57247	4.76312	3.89921	5.10835	5.19424	4.83334	4.58623	7.22249	4.55124	4.98984	5.07171	7.51181	5.77701	5.2582	3.4307	6.23747	5.61053	5.74619	0.718051	0.0394742
NewGene_8483	NewGene_8483	18	12	44	30	60	60	60	53	96	59	45	103	44	32	142	33	45	80	61	67	0.231683	0.109481	0.772653	0.388323	0.671108	0.940584	0.679937	0.418837	1.04574	0.670064	0.720358	1.21354	0.630644	0.369149	1.96592	0.246158	0.656004	1.11442	0.607838	0.588834	0.137985	0.490234
ENSG00000012048	BRCA1	214	176	252	209	205	210	220	268	204	230	198	176	161	204	229	307	135	224	250	233	0.801538	0.749851	1.40707	0.776449	0.725496	0.785884	1.45702	0.964171	0.767511	0.782556	0.663204	0.732592	0.636295	0.844929	0.853056	1.20989	0.598243	0.885939	0.97933	0.769905	0.928677	0.00872146
ENSG00000149716	LTO1	266	247	297	276	261	194	341	306	314	451	304	339	231	317	321	336	187	301	303	407	3.25259	3.30042	3.18018	3.54079	2.9488	2.2661	3.89818	2.86997	3.83811	4.1581	3.13715	4.2331	2.91737	3.66796	3.62839	4.36596	2.47534	3.33473	3.59114	4.94137	0.146833	0.117068
ENSG00000184254	ALDH1A3	1448	1474	1008	994	1405	1387	1111	1197	1324	1923	992	1229	1119	1516	859	1302	981	1198	1898	1737	9.41291	9.6383	5.8129	6.37114	8.6831	9.17705	6.44923	6.30848	9.24312	9.75613	5.74219	8.19977	7.84246	10.0661	5.21548	9.09279	7.27085	7.80683	12.8504	10.2374	0.933913	0.0103264
ENSG00000138942	RNF185	1349	1163	1174	1023	1094	1024	1125	1329	1239	1693	1099	1300	933	1291	1077	1208	820	1233	1399	1318	10.7855	9.39641	8.31912	7.92262	8.34387	8.38074	8.08522	8.60182	10.3607	10.5916	7.84512	10.6966	8.09837	10.457	7.97063	10.3361	7.48923	9.62642	11.576	9.32601	0.875974	0.00829354
ENSG00000138944	SHISAL1	113	36	55	32	75	73	108	137	23	61	48	42	39	56	51	66	35	34	28	131	0.42398	0.135081	0.181942	0.117325	0.262235	0.279734	0.36161	0.415258	0.089907	0.178276	0.160931	0.158964	0.158274	0.211256	0.174135	0.262425	0.148925	0.123938	0.10826	0.444033	0.191147	-0.397789
ENSG00000163170	BOLA3	1220	1352	1021	1368	1272	1087	1939	1427	855	2370	1108	894	1151	1401	969	541	1332	1616	934	840	53.3374	57.128	37.9889	58.3344	51.9378	47.4795	73.8294	49.5728	38.2867	81.1522	42.3956	39.6194	54.1101	61.2807	38.4816	24.8209	65.9903	67.2586	41.5943	31.739	0.231207	-0.239632
ENSG00000163171	CDC42EP3	1884	1864	2387	2098	1795	1614	2504	3181	3625	3148	3406	2670	2230	1376	2940	2380	1483	2249	2703	2511	8.45961	8.46283	9.54996	9.25878	7.72338	7.37328	10.1879	11.6872	17.0609	10.9808	13.5901	12.3624	11.0131	6.3064	13.0581	11.5184	7.58055	9.79081	12.5436	10.4516	0.559849	0.0819751
ENSG00000166529	ZSCAN21	308	280	250	306	305	249	291	412	370	480	312	281	257	287	303	333	259	415	326	356	4.3623	3.75496	2.87326	3.82003	3.67747	3.21622	3.33437	4.37053	5.1732	4.82043	3.71568	3.79167	4.4987	3.74157	3.62741	4.72968	3.78411	5.47424	4.77394	4.70138	0.722482	0.031106
ENSG00000166526	ZNF3	640	512	670	565	551	495	577	670	587	723	567	657	579	624	583	626	456	572	715	565	6.57755	4.80654	5.97969	5.32498	4.88584	4.65362	5.02813	5.15232	5.65545	5.30963	4.83174	6.40131	6.82326	6.31133	5.19406	6.15833	4.81525	5.40606	7.73508	4.85297	0.311328	0.0671307
ENSG00000182362	YBEY	286	298	220	222	286	268	305	295	171	403	406	269	220	355	254	223	226	306	218	289	9.29198	9.92644	6.44535	7.12284	8.73169	9.24143	9.10232	7.29108	5.88452	10.4835	11.993	9.16982	7.83404	11.5248	7.77529	7.92763	8.79344	9.86195	7.37847	8.31597	0.559387	0.0841768
ENSG00000114698	PLSCR4	1851	1734	1027	956	1367	1218	1338	1406	1619	2274	998	1504	1021	2416	1269	1933	848	1669	1553	2321	14.6004	13.8359	7.295	7.70144	10.4821	9.78478	9.83484	8.89515	13.7207	13.84	6.8961	12.6198	8.69502	19.5497	9.53585	16.575	7.66218	12.911	12.878	16.6822	0.419408	0.12077
ENSG00000184787	UBE2G2	3680	3250	4338	3332	3379	3102	3602	4191	4004	4776	3644	3654	3316	3499	3805	4173	2443	3547	3965	4775	27.2366	24.1566	27.784	24.1655	23.0966	22.8105	23.4943	24.7711	31.0154	27.1287	23.6156	27.6897	26.3061	26.2284	25.3808	33.2815	21.1282	25.1463	29.9212	31.3849	0.351656	0.0357756
ENSG00000184785	SMIM10	251	265	155	227	200	218	239	266	237	542	224	281	249	330	230	234	185	358	294	374	4.14429	4.41018	2.26947	3.68594	3.09353	3.67268	3.53835	3.56493	4.08251	7.00188	3.29521	4.7772	4.46312	5.51255	3.5141	4.12178	3.48087	5.76666	5.01818	5.58863	0.207102	0.175617
ENSG00000181555	SETD2	1444	1334	1768	1598	1231	1419	1342	1787	1757	1804	1282	1436	1283	1391	1385	1823	879	1401	1613	1659	4.72099	4.43587	5.14296	5.21394	3.85986	4.75612	3.94607	4.79542	6.06705	4.67094	3.78497	4.87254	4.58052	4.67102	4.2309	6.39074	3.31145	4.51179	5.48132	4.95468	0.298262	-0.0677461
ENSG00000168476	REEP4	220	226	179	183	150	171	177	286	295	344	211	188	165	254	203	221	112	206	225	249	3.28864	3.38343	2.34595	2.72312	2.10346	2.67835	2.35628	3.72001	4.56842	3.98549	2.78835	2.85519	2.65071	3.87292	2.77241	3.56988	1.87911	3.00166	3.45851	3.39797	0.602407	-0.0556694
ENSG00000168477	TNXB	8838	6114	5836	5112	5591	4170	5681	8579	8476	11965	4296	5959	3501	7948	5520	14454	2723	7471	9971	7892	32.6529	19.8708	14.8799	17.1924	14.4637	16.6657	14.9578	14.0322	25.4845	42.7154	20.1083	15.7677	12.1149	38.2164	17.2365	30.7184	13.202	27.8955	31.5786	23.853	0.816087	0.0448697
ENSG00000112697	TMEM30A	4140	4309	5821	5017	4585	4880	4144	5470	5884	5644	4343	4694	4927	4470	4572	5018	3107	4514	4890	6423	22.8668	24.1308	28.4956	27.352	23.795	27.5638	20.5737	24.5514	34.028	24.4398	21.4462	26.7561	29.5556	25.0565	23.3847	29.6367	19.633	24.352	27.9689	32.1744	0.712907	-0.0268137
ENSG00000112695	COX7A2	4871	5045	3924	5159	4556	4234	6817	5199	4302	11169	5323	4155	4790	5755	4342	2650	5482	5754	3730	3313	178.044	205.308	135.145	182.476	176.007	158.129	223.213	153.837	149.343	324.253	194.692	176.408	171.798	213.127	136.626	94.8289	211.287	202.11	141.938	121.367	0.431528	-0.14441
ENSG00000112699	GMDS	236	185	178	172	203	215	216	248	170	425	213	209	151	277	199	189	152	251	236	327	3.41742	2.69383	2.27598	2.45505	2.75394	3.1792	2.79929	2.91732	2.57482	4.81481	2.75047	3.10766	2.35888	4.05354	2.6626	2.91139	2.51457	3.54097	3.52426	4.28561	0.696514	0.0485485
ENSG00000182093	WRB	1973	2330	1894	1533	1972	1697	2115	2075	1695	2398	2082	2083	1864	2166	1979	1381	1787	2244	1904	2346	34.2087	40.9293	28.8812	25.4975	31.1568	28.8299	31.5572	28.5259	31.5049	33.6838	31.315	36.1199	34.4512	36.3469	30.2832	25.1808	33.5131	36.0646	33.3788	36.0499	0.378076	0.09065
ENSG00000182095	TNRC18	1464	1204	1379	1386	1135	1014	1262	1733	1735	1711	1193	1540	1000	1152	1233	1980	702	1226	1639	1634	3.77842	3.36351	3.08066	3.92257	2.82993	2.68693	3.13023	3.6236	4.73621	3.48611	2.74116	4.42336	2.84039	3.06257	2.9016	5.65689	2.19908	3.55351	5.14594	3.74621	0.847475	-0.0190072
ENSG00000108578	BLMH	893	812	1131	1036	944	907	919	1153	978	1238	1026	812	854	905	882	823	569	783	970	1064	9.61207	8.81653	10.7575	10.9569	9.55634	9.95092	8.8655	10.0608	10.9968	10.3735	9.83486	8.95341	9.92334	9.90043	8.75049	9.44642	6.97352	8.19659	10.7719	10.334	0.0425924	-0.136559
ENSG00000119514	GALNT12	496	411	279	227	180	174	697	540	383	749	151	392	254	684	163	396	297	406	491	272	4.60013	3.84338	2.29133	2.07527	1.56119	1.6461	5.81173	4.06759	3.70858	5.43391	1.25101	3.73907	2.54821	6.42282	1.39812	3.92018	3.14698	3.67553	4.70848	2.27781	0.641146	-0.124507
ENSG00000074527	NTN4	3415	3602	3459	3347	4254	3972	4016	4837	5347	7256	2702	2796	2590	3443	3454	3636	2767	4175	3386	5519	24.0196	25.5686	21.6324	23.2141	28.1497	28.6866	25.4274	27.6214	39.4231	39.8776	16.954	20.2368	19.8642	24.4855	22.7043	27.3555	22.2309	28.6503	24.5986	35.1597	0.016966	-0.257836
ENSG00000050130	JKAMP	1478	1624	1691	1407	1446	1616	1635	1663	1909	2530	1572	1912	1368	1975	1676	1721	1505	1536	1704	1822	19.3183	22.5769	20.4747	18.8834	18.12	22.0595	19.8653	17.7529	26.3375	25.5829	16.7891	24.7138	20.0322	26.5696	19.7954	24.4738	21.7054	20.0243	22.7236	22.3958	0.358093	0.0701352
ENSG00000065600	TMEM206	238	282	198	195	156	99	222	259	254	243	220	165	218	167	236	182	104	225	129	188	2.43966	3.17002	1.79871	1.96756	1.49849	1.03625	2.04796	2.16468	2.87062	2.08122	2.00831	1.74373	2.68122	1.72601	2.23298	2.17904	1.21858	2.50847	1.36254	1.74228	0.364943	-0.144646
ENSG00000169989	TIGD4	212	119	86	59	81	73	58	35	176	162	82	227	110	322	137	354	45	204	202	441	2.17519	1.23185	0.779652	0.593489	0.775386	0.757162	0.529332	0.29159	1.88087	1.30071	0.744804	2.40099	1.21875	3.34384	1.29801	3.88454	0.51794	2.03725	2.13842	4.09496	0.00187827	1.01088
ENSG00000169981	ZNF35	123	131	155	116	138	112	130	185	171	197	207	141	136	161	186	137	94	147	135	181	1.20457	1.25463	1.36482	1.08868	1.24805	1.09604	1.11011	1.43118	1.79295	1.45515	1.77868	1.39125	1.47709	1.54137	1.63771	1.40407	1.10325	1.37354	1.32611	1.55534	0.170821	0.143534
ENSG00000154262	ABCA6	1687	1352	949	839	869	779	1088	1283	1433	1833	581	1317	779	1735	900	1858	1021	1225	1063	1446	8.67513	7.18555	4.10368	4.32775	4.11679	4.05478	5.06631	5.25899	7.65148	7.59063	2.69313	7.23999	4.35808	9.9938	4.37589	10.4582	6.20987	6.66205	5.80215	7.02982	0.72271	0.0606009
ENSG00000154263	ABCA10	1434	1161	597	514	685	633	1093	982	1173	1145	909	1290	428	1270	1013	1280	716	892	841	1086	8.39435	6.74657	2.79112	2.95817	3.68012	3.81337	5.41638	4.40775	6.98138	5.17176	5.43895	7.95348	2.56406	8.07659	5.57386	8.42718	5.83416	5.07229	6.21729	6.21553	0.530343	0.113344
ENSG00000154265	ABCA5	1543	1622	1958	1721	1573	1595	1330	1818	2395	2010	1489	1890	1719	1268	2136	1671	1225	1592	1571	1881	5.64382	5.73499	6.96402	5.77098	4.98531	5.48257	4.08871	5.14102	9.53936	6.73906	5.38395	6.94335	6.86366	5.69146	7.20636	7.92884	5.31115	5.63116	5.91446	9.33326	0.860625	-0.0180249
ENSG00000094963	FMO2	5530	5224	5361	4955	7771	7383	6954	7517	6937	9406	3669	5736	4793	7136	4558	4588	6039	6492	4358	4812	36.4701	34.8167	31.3822	32.2357	48.1591	49.8821	41.219	40.3476	48.0551	48.4858	21.676	38.9841	34.2855	47.8812	27.7928	32.3878	45.5811	41.8156	29.7189	28.7178	0.0815905	-0.258264
ENSG00000180209	MYLPF	52337	58698	64958	68799	54934	50224	66897	59946	42719	70287	70081	53813	55788	59891	52637	36793	57796	62922	42968	59739	1951.28	2208.32	2143.23	2528.7	1924.9	1914.3	2237.58	1814.36	1667.22	2050.66	2334.84	2063.69	2253.54	2259.08	1814.43	1464.67	2462.27	2288.25	1658.53	2018.12	0.976279	-0.0040231
ENSG00000164961	WASHC5	1354	1233	1564	1150	1388	1320	1305	1799	1636	1724	1238	1326	1275	1343	1218	1526	794	1269	1629	1674	8.20612	7.54455	8.39953	6.87442	7.90007	8.18118	7.10562	8.85501	10.37	8.16461	6.70149	8.27483	8.38632	8.24909	6.82705	9.88598	5.50384	7.51131	10.215	9.18959	0.340126	-0.0600085
ENSG00000187257	RSBN1L	806	801	959	879	790	793	777	963	969	1037	845	932	724	903	809	842	504	798	896	1023	3.18379	3.1963	3.37774	3.42345	2.92958	3.20085	2.75378	3.08797	4.13387	3.20478	3.01187	3.82816	3.09761	3.61368	2.95546	3.55186	2.2746	3.07617	3.78794	3.72155	0.672438	-0.0228002
ENSG00000164967	RPP25L	1319	1498	1571	1371	1224	1166	1557	1780	1255	1784	1429	1263	1111	1291	1390	1092	1360	1277	1212	1394	34.0432	38.7059	34.7015	34.1265	29.9667	30.4034	36.1702	37.9256	33.1089	35.3558	33.3553	33.2973	30.9441	33.0586	32.8152	29.2665	39.8027	32.6488	32.4579	33.8146	0.383474	-0.0843707
ENSG00000123444	KBTBD4	867	968	985	779	896	909	988	1139	1016	1131	1117	1057	893	949	852	830	691	883	1013	1276	8.50996	9.61303	9.14668	7.76074	8.60932	8.66028	8.76561	9.75764	11.1641	8.60371	10.1789	10.2744	9.94528	9.63846	8.1321	9.25148	8.23352	9.18563	10.3428	11.54	0.487316	0.0491295
ENSG00000165389	SPTSSA	1096	1103	1209	1046	1229	1152	1306	1295	1271	1920	1305	1083	1040	1409	1118	895	890	1419	1104	1340	10.0102	10.1791	9.78731	9.42421	10.5483	10.7637	10.7207	9.60833	12.1512	13.723	10.6538	10.1923	10.3113	13.0479	9.44671	8.74195	9.29849	12.6623	10.4353	11.092	0.655576	-0.0387414
ENSG00000090621	PABPC4	11162	11380	13260	11058	9114	9048	10794	12328	9990	13346	10539	11006	10280	11600	10788	10650	8394	10706	9394	12733	99.6108	102.259	104.939	98.9475	77.2737	82.3603	87.1071	89.9155	92.9752	92.7335	85.4672	102.105	99.521	103.636	92.2985	103.172	86.2949	92.1781	88.3029	106.622	0.943612	0.00454284
ENSG00000183571	PGPEP1L	150	118	108	110	52	60	104	155	40	129	139	85	90	117	63	101	38	196	81	164	2.88255	2.45838	1.69357	2.17269	1.02071	1.42108	2.42436	2.77089	0.709946	2.20703	2.62614	1.75607	1.97197	2.17331	1.30381	2.24334	1.00204	5.18194	1.48415	3.02311	0.640101	0.115879
ENSG00000183578	TNFAIP8L3	127	109	101	94	102	126	96	156	90	163	76	111	85	122	50	107	70	107	110	143	1.59932	1.39393	1.1297	1.17073	1.21246	1.63191	1.08571	1.60421	1.18248	1.61348	0.854033	1.44615	1.15942	1.55899	0.577118	1.44826	1.00361	1.31545	1.43289	1.63627	0.195648	-0.183133
ENSG00000165688	PMPCA	1688	1513	2110	1798	1583	1516	1649	2245	1577	1890	2006	1597	1626	1528	1799	1861	1157	1554	1812	2091	19.5632	17.796	21.7254	20.6592	17.309	18.0688	17.2266	21.237	19.2148	17.1759	20.8486	19.1155	20.5288	18.0158	19.3675	23.1052	15.3488	17.6679	21.7576	22.036	0.780902	0.0204053
ENSG00000250021	C15orf38-AP3S2	0	239	73	177	66	131	0	66	95	101	47	85	61	107	80	61	54	145	58	91	0	2.50808	0.671815	1.80858	0.638467	1.38759	0	0.552197	1.03064	0.820212	0.433025	0.903116	0.683023	1.11834	0.760838	0.678233	0.639343	1.46715	0.617794	0.855508	0.670305	-0.244043
ENSG00000116863	ADPRHL2	907	724	762	653	743	695	759	822	777	1110	900	704	713	802	779	857	513	810	854	990	13.7909	11.1193	10.271	9.79485	10.607	10.8107	10.3781	10.1559	12.3662	13.1988	12.2243	11.0278	11.7697	12.3651	10.9544	13.9376	8.91677	12.0305	13.434	13.6376	0.255603	0.0632385
ENSG00000006756	ARSD	458	425	215	278	282	206	290	416	546	597	468	446	285	392	286	507	214	464	449	598	2.28243	2.11128	0.935577	1.34737	1.29961	1.03432	1.27926	1.66192	2.80945	2.29364	2.0571	2.2598	1.52095	1.95002	1.29756	2.66621	1.19985	2.22699	2.28466	2.66031	0.177479	0.215031
ENSG00000006757	PNPLA4	772	848	842	714	699	642	946	872	816	1299	745	680	727	1663	758	1272	661	1108	721	1103	6.23049	7.05098	6.8191	5.6464	7.07086	5.70592	6.60391	5.5237	6.56528	7.95334	5.02113	5.57279	6.14167	13.9263	5.48773	12.3041	6.44093	9.73289	6.34552	8.01358	0.0889741	0.23272
ENSG00000154889	MPPE1	788	1097	1504	1152	1088	915	1452	1730	1562	1739	1218	1095	813	1059	814	1299	830	926	1217	1022	6.43543	9.43444	10.0951	9.15139	8.05177	7.73915	10.4767	11.6702	14.8903	13.6221	10.7452	9.50701	8.25469	9.05815	6.96587	10.6952	7.67634	8.46982	10.4469	8.39753	0.0249952	-0.250801
ENSG00000159459	UBR1	803	826	1289	1064	1071	984	942	1366	1202	1093	961	1025	1070	789	964	1239	665	879	1037	1103	2.61947	2.7269	3.74314	3.44715	3.28733	3.31239	2.78883	3.7013	4.11004	2.82035	2.80777	3.53712	3.82296	2.6669	2.94063	4.36485	2.48682	2.80434	3.64584	3.26549	0.536704	-0.0610508
ENSG00000165684	SNAPC4	287	222	276	295	195	132	251	365	316	317	211	334	142	247	237	322	142	203	314	279	1.45328	1.13527	1.24751	1.47933	0.923847	0.679862	1.14075	1.49754	1.67989	1.25219	0.953866	1.73841	0.775555	1.26795	1.11022	1.7432	0.821054	1.00306	1.64534	1.27574	0.671169	-0.0599849
ENSG00000100483	VCPKMT	183	205	162	121	142	127	161	243	223	312	289	175	109	185	185	135	165	211	201	207	2.80035	3.03172	2.04994	1.70187	1.9272	1.83188	2.04432	2.82962	3.32625	3.52842	3.6908	2.61182	1.74322	2.70547	2.42681	2.08487	2.85344	2.93359	2.99696	2.66264	0.551203	0.0905872
ENSG00000100485	SOS2	2689	2890	4196	3009	3129	2998	2948	3784	3222	3151	2676	2870	3021	2640	2960	2938	2302	2954	2647	3503	13.0922	14.3682	17.9436	14.4718	14.2918	14.9214	13.0759	15.2139	16.5137	12.4045	11.9547	14.5409	15.9045	13.1859	13.5124	15.4121	13.0468	14.2718	13.5842	15.5729	0.251087	-0.0971582
ENSG00000129562	DAD1	2030	1958	1663	1799	2008	1777	2026	1918	2010	3562	2206	1818	1710	2610	1898	1594	1626	2416	1941	2316	70.4433	68.7323	51.161	61.5954	65.4979	63.3071	65.7678	54.0538	72.9784	96.7721	68.4266	65.0246	64.3837	94.858	61.1318	59.1547	64.5419	82.1528	69.7022	72.8097	0.65017	0.0454282
ENSG00000107651	SEC23IP	955	1036	1272	1000	1129	1143	1104	1349	1473	1291	1182	1085	1160	1070	1240	1258	791	1181	1199	1466	3.55592	3.81296	4.12927	3.60806	3.98275	4.36788	3.88033	4.23485	5.85393	3.68961	3.8235	4.28186	4.69689	4.03061	4.4572	4.93919	3.30444	4.15939	4.89232	5.07503	0.478036	0.0499478
ENSG00000006282	SPATA20	2089	1934	2218	1901	1181	928	2049	2592	1887	2650	1990	2257	1723	1954	2267	2370	1500	1978	2228	2563	19.3074	18.0687	18.0805	17.4529	10.315	8.7837	16.5806	19.5527	18.3248	19.2202	16.5061	21.4383	17.15	18.2586	19.3645	23.3097	15.9439	17.9201	20.7946	21.1526	0.0881288	0.188297
ENSG00000006283	CACNA1G	21	26	62	69	50	58	18	57	47	18	52	43	56	63	36	87	16	19	88	82	0.064905	0.080243	0.172476	0.209549	0.144426	0.185798	0.049666	0.140949	0.148658	0.043156	0.144682	0.13622	0.218635	0.198691	0.101696	0.289969	0.051987	0.057153	0.31123	0.229142	0.295935	0.341326
ENSG00000174004	NRROS	211	147	176	219	212	244	236	282	247	270	201	160	181	239	142	279	114	272	284	233	2.08705	1.46571	1.53943	2.12997	1.96897	2.46091	2.09871	2.26504	2.54881	2.08885	1.77055	1.62803	1.93717	2.38926	1.30029	2.9437	1.28531	2.62112	2.89943	2.0824	0.761423	-0.040414
ENSG00000198718	TOGARAM1	1303	1253	1776	1231	1172	1299	1075	1233	1357	1194	1180	1386	1495	1334	1545	1600	901	1113	1074	1611	5.18887	5.03737	6.25962	4.94916	4.40883	5.32097	3.92065	3.98418	5.67875	3.76395	4.30547	5.69311	6.49157	5.38048	5.69025	6.80683	4.09526	4.34008	4.42055	5.8733	0.389559	0.0959304
ENSG00000164035	EMCN	2147	2083	3578	3527	3901	3858	2670	3398	3720	3247	3361	2678	3236	2642	3714	3227	2160	2718	2805	3707	14.0063	13.253	21.4921	21.911	23.1473	25.7736	15.6864	17.9163	24.462	16.4632	18.8771	17.3861	23.276	17.4379	21.6012	22.6923	15.7101	16.6783	18.7026	21.679	0.82039	-0.030313
ENSG00000164032	H2AFZ	1990	2156	2329	2432	1999	2222	2093	2317	2011	3606	2350	2176	2069	2576	2138	1843	1996	2613	2063	2682	51.5716	56.4314	53.4835	62.1804	48.6698	58.8809	48.7424	48.7723	54.5388	73.1066	54.4316	58.1144	58.1731	67.678	51.2662	51.0573	59.162	66.148	55.317	62.9667	0.602078	0.0466973
ENSG00000164031	DNAJB14	973	1130	1127	972	962	1000	913	1113	1498	1655	1009	1096	878	1117	940	1325	853	1045	1138	1355	4.05996	4.78321	4.20816	4.04656	3.78017	4.29337	3.43234	3.79771	6.57053	5.45113	3.76191	4.7156	4.03022	4.73075	3.64712	5.94852	4.10759	4.2696	4.91321	5.14416	0.996848	0.000293535
ENSG00000198712	MT-CO2	633399	727804	737676	693703	852212	838727	883767	801366	472611	656938	841618	551249	605881	619707	874161	404459	874034	741937	524302	541629	23500.5	27277	24255.6	25394	29708	31823.3	29471.2	24146.7	18345.7	19064.2	27903.9	21077.6	24393.7	23304.1	30008.2	16046	37087.7	26883.1	20127.7	18202.4	0.774129	-0.0542443
ENSG00000198715	GLMP	549	404	326	366	348	319	443	529	392	771	256	408	287	647	287	286	270	502	511	508	9.3298	7.58534	4.89403	6.22012	5.66604	5.55552	6.9255	7.72666	7.13872	11.2726	4.10001	7.75289	5.18596	10.9842	4.58286	5.5406	5.76628	7.47429	8.89221	7.82835	0.592438	-0.084431
ENSG00000164038	SLC9B2	388	332	238	263	256	251	402	449	430	612	311	286	209	416	294	348	240	365	350	453	5.22957	4.16399	3.13054	3.51894	2.77237	3.63273	3.9986	3.92489	5.65008	5.36003	3.38211	4.80303	2.65691	5.50121	3.86201	4.96494	3.72027	3.8873	5.24035	5.42154	0.619008	-0.0615919
ENSG00000164039	BDH2	1294	1192	1104	1023	1103	1030	1138	1123	1350	2352	859	1331	871	1540	932	926	993	1315	1314	1671	29.8838	27.8525	22.5928	23.2931	23.8625	24.2575	24.9181	21.6336	32.5572	42.1043	17.4464	31.9263	21.8035	35.8968	19.7847	22.6233	26.2296	29.777	31.3622	34.7064	0.843435	-0.023942
ENSG00000100151	PICK1	662	534	917	635	592	523	727	866	597	707	798	715	598	602	754	724	456	665	806	804	8.16937	6.67157	10.1722	7.70555	6.76252	6.52447	8.25383	8.71362	7.82653	6.96874	8.76909	9.01196	7.84499	7.45185	8.93471	9.81587	6.33017	8.0196	10.2315	8.8302	0.261239	0.101359
ENSG00000100150	DEPDC5	277	198	312	259	277	259	235	384	282	310	257	272	253	242	236	288	205	255	320	285	1.30917	0.858138	1.48306	1.12339	1.10556	1.24996	0.931343	1.94476	1.27521	1.02844	0.9539	1.20068	1.13247	1.00521	0.972939	1.58356	1.27578	1.40667	1.35074	1.05167	0.808163	-0.0210669
ENSG00000100156	SLC16A8	88	105	34	51	40	57	83	87	58	81	26	95	59	62	37	57	18	71	74	40	1.17845	1.43292	0.395682	0.6749	0.496775	0.782817	0.999265	0.952081	0.810491	0.849225	0.306722	1.31844	0.859307	0.848263	0.458188	0.814663	0.276228	0.929857	1.03678	0.477367	0.267126	-0.287176
ENSG00000171634	BPTF	1230	1332	1256	1201	1032	1113	1093	1331	1558	1494	1110	1344	1001	1107	1192	1746	823	1168	1506	1545	5.0221	3.7557	3.30782	4.2261	3.86596	4.83665	3.48534	3.27293	6.87843	4.4659	4.61561	5.80813	3.25991	5.18078	4.82395	6.19052	3.70629	4.3845	6.03912	5.88647	0.55489	0.0461367
ENSG00000125743	SNRPD2	1612	1484	1016	1560	1154	1029	1768	1317	1200	3452	1200	1413	1240	2238	1156	940	1383	1888	1272	1325	49.955	43.3943	25.8592	44.8944	32.1156	29.8964	55.4262	30.087	43.5324	77.393	31.8	41.2595	38.8105	69.6682	30.1589	28.3258	49.4519	52.6735	37.0682	33.9868	0.891044	-0.0247166
ENSG00000125741	OPA3	1023	882	1530	1265	1112	996	1291	1820	1400	1186	1368	976	1302	904	1312	1387	870	1155	1081	1205	3.57619	2.95955	4.47585	4.21573	3.44761	3.44487	3.96911	4.95425	5.06471	3.23199	4.17146	3.45187	4.64979	3.03909	4.15861	4.97104	3.37906	3.76287	3.85436	3.73996	0.787727	-0.0317063
ENSG00000125746	EML2	417	359	391	399	463	437	486	724	533	615	463	429	359	385	402	535	313	602	434	584	4.75698	4.03796	3.24593	4.54599	5.02537	5.01442	4.89481	6.74583	6.2548	5.36161	4.98191	5.11296	4.45222	4.55091	4.23204	6.43748	4.0534	6.64322	5.06492	5.91835	0.785723	-0.0269834
ENSG00000125744	RTN2	3296	3687	5339	4695	3915	3987	3708	5071	3684	4018	4984	4422	4509	3148	4363	3876	3106	3888	3505	5123	46.834	79.3758	67.4226	102.241	80.4826	88.4008	73.21	91.2824	83.5805	54.6168	97.6581	99.1864	68.8592	47.456	63.6366	84.5653	77.9235	80.6864	78.2408	91.8656	0.654416	0.0506451
ENSG00000203546	AL139353.1	51	82	42	27	24	49	94	63	58	132	38	54	60	71	53	42	37	71	51	70	1.60707	2.78284	1.18352	0.853913	0.719905	1.60699	2.76617	1.67745	1.9038	3.42882	1.11226	1.79229	2.14213	2.369	1.58474	1.16027	1.32153	2.24863	1.73158	2.11773	0.728798	-0.081781
ENSG00000167608	TMC4	85	100	108	77	106	65	80	106	131	88	150	71	69	43	55	96	102	86	156	37	0.943617	1.07662	1.02145	0.805965	1.17504	0.806135	0.795819	0.944549	1.45755	0.819015	1.43638	0.775333	0.793007	0.458214	0.6714	1.08533	1.21608	0.902727	1.71197	0.349522	0.906029	-0.0294017
ENSG00000124299	PEPD	2235	1877	1887	1826	1801	1635	2093	2490	1848	2726	2196	1737	921	2513	2004	2349	1197	1938	2105	2584	29.933	25.2343	22.2002	23.9601	22.5234	22.203	25.0159	26.9069	25.7375	28.9901	26.2122	23.7984	13.292	33.8542	24.7449	33.3546	18.2784	25.1736	28.9494	31.1445	0.938805	-0.00825953
ENSG00000167601	AXL	2738	2188	1012	884	1339	1070	1280	1458	1424	2746	884	1604	917	2952	1218	2532	834	1944	2291	2531	14.7791	12.2139	5.00723	4.7746	6.95183	6.05157	6.27388	6.57316	8.19824	11.7854	4.27323	8.98906	5.46965	16.3498	6.3574	15.0818	5.13112	10.3047	12.8464	12.4778	0.4188	0.17975
ENSG00000167604	NFKBID	84	72	36	37	35	34	59	93	56	144	50	46	29	60	49	66	28	61	71	102	1.27528	1.05464	0.474214	0.546353	0.472691	0.525034	0.951611	1.07638	0.919729	1.67986	0.764273	0.649976	0.468895	0.865653	0.689501	0.987459	0.472656	0.833214	1.24125	1.37969	0.576008	-0.127775
ENSG00000243989	ACY1	515	604	515	449	632	359	569	809	550	607	566	501	423	541	411	554	505	420	572	712	8.41289	10.1086	6.86357	7.04284	9.16861	5.6624	7.88898	10.3287	9.01902	7.29888	7.9859	8.16225	7.1071	8.48513	5.89007	9.62261	9.06472	6.16378	9.42449	10.0709	0.791513	-0.0298711
ENSG00000096717	SIRT1	923	945	904	849	1024	931	1051	1011	1103	1223	860	1025	848	982	917	1007	661	858	946	1260	6.09384	6.19632	4.99059	5.30556	5.96306	5.98875	6.233	5.09231	7.26044	6.39336	4.76107	6.58679	5.74174	6.16553	5.32439	7.07036	4.77074	5.19288	6.06143	7.07081	0.639496	-0.0281844
ENSG00000172671	ZFAND4	194	233	208	151	220	194	190	323	220	248	219	230	175	290	215	259	127	231	139	263	1.67524	1.86723	1.59825	1.13309	1.66555	1.62311	1.70058	2.07063	2.20262	1.53419	1.77735	1.95596	1.5196	2.4219	1.67591	2.36928	1.09114	1.59287	0.954129	1.98107	0.736584	0.0415444
ENSG00000009950	MLXIPL	1913	1615	2028	1881	1382	1234	1957	2622	1744	2060	2271	1969	1700	1322	2130	2191	1271	1574	1775	2288	15.9421	13.6159	15.5	15.5331	10.7232	10.0795	15.5624	17.8062	15.6424	13.2119	16.5586	16.9688	15.8182	11.1562	16.3219	19.9891	12.0878	12.6734	15.238	16.8421	0.44336	0.0802384
ENSG00000046647	GEMIN8	322	353	295	213	270	232	289	252	272	413	328	335	250	394	399	299	246	343	323	455	5.41326	6.12253	4.68257	3.38565	4.51491	3.99881	4.22136	3.56419	5.50407	5.50968	5.19565	5.843	4.62492	6.9806	6.33008	6.10188	4.80203	5.6408	6.28859	7.69802	0.00566393	0.280223
ENSG00000240184	PCDHGC3	3531	2581	1157	1642	1998	1999	2381	2080	1759	4194	1683	1775	833	3621	1874	2772	1218	2672	1841	2680	19.542	14.2151	5.67788	8.70642	10.082	10.9829	11.9182	9.23876	11.8999	19.5397	8.0809	9.99559	4.93084	20.8795	9.31018	18.4565	7.48332	15.7383	13.4523	13.2146	0.629843	-0.097788
ENSG00000009954	BAZ1B	2019	1721	2019	1806	1693	1804	1890	2304	1997	2284	1847	1941	1634	1493	1735	2400	1235	1972	2227	2161	8.64942	7.45932	7.64338	7.63805	6.92589	7.91374	7.29544	8.04355	8.99766	7.61337	7.03261	8.72489	7.59187	6.46244	6.87958	11.0361	6.03334	8.26654	9.85349	8.3852	0.935882	-0.00507285
ENSG00000127241	MASP1	3964	2790	1992	1590	2588	2245	3860	4754	2686	2363	3065	2969	3013	1953	3272	2997	1736	2316	2311	2451	40.2006	27.2647	17.1821	14.4836	24.4417	22.7774	34.8187	39.0279	28.4209	18.3999	27.7525	30.0845	33.3206	19.6389	30.1572	32.0373	19.3865	22.5668	23.6698	22.3499	0.696729	-0.0665436
ENSG00000144476	ACKR3	6908	6095	2002	1967	2990	2693	3539	3633	2601	5214	1599	3513	1822	6040	1706	3625	2730	5541	5303	4903	79.6777	84.2781	20.5434	33.2095	32.3967	49.3467	36.6597	34.06	49.2113	52.7731	22.8982	41.7709	22.823	70.6456	18.291	44.7364	36.1171	62.465	63.2814	60.5706	0.949428	0.0162863
NewGene_2503	NewGene_2503	68	61	122	61	83	112	98	106	90	123	98	69	95	60	120	97	95	56	87	115	0.682355	0.600813	1.11006	0.648768	0.784554	1.10501	0.936182	0.828068	1.00558	1.04732	1.0916	0.73486	1.08489	0.834285	1.0749	1.22287	1.27842	0.522503	0.887414	1.07919	0.814808	0.0419721
NewGene_2501	NewGene_2501	218	233	181	171	134	121	215	170	231	177	101	237	198	197	170	266	116	169	231	195	2.33124	2.27679	1.82369	1.82937	1.46223	1.27989	1.87399	1.56416	2.4518	1.44778	0.877856	2.99561	2.47213	2.50972	1.88386	3.49743	1.78131	1.64582	3.32077	1.85159	0.61042	0.0799985
ENSG00000136425	CIB2	688	635	381	307	395	277	688	611	697	1187	652	715	231	349	790	272	326	733	866	328	11.2723	10.8316	5.58666	4.97865	6.16951	4.68139	10.6315	9.04338	12.6177	16.4028	9.41708	11.8977	4.06577	5.88288	12.0703	4.79963	5.97404	11.5772	14.6938	4.90268	0.869246	-0.0414645
NewGene_2505	NewGene_2505	76	73	90	47	76	40	56	81	70	85	69	61	45	42	73	86	62	32	84	91	0.923386	0.920121	1.10086	0.640872	0.945084	0.543613	0.596926	1.05635	0.910836	0.87601	0.77205	0.748566	0.617138	0.46377	0.821799	1.18915	0.884712	0.348665	1.34395	1.02763	0.877099	-0.0278674
NewGene_2504	NewGene_2504	29	21	25	0	6	11	0	10	85	217	49	15	43	190	44	112	27	363	459	396	0.391137	0.187678	0.337288	0	0.047806	0.21797	0	0.074699	0.945973	1.69369	0.463051	0.153453	0.562006	2.09884	0.561481	1.44689	0.387475	3.61291	4.88058	3.78615	0.00600263	2.24068
ENSG00000010322	NISCH	2660	2135	2109	1897	1756	1550	2055	2502	2443	3121	2198	2589	1590	2325	2286	2900	1374	2328	2708	2625	13.7982	11.1798	9.74335	9.90363	8.61225	8.28871	9.58769	10.5907	13.5143	12.7025	10.1344	13.6819	9.13182	12.4603	10.9099	16.1896	8.24266	11.9398	14.5672	12.2754	0.150904	0.113807
ENSG00000158195	WASF2	3462	2891	3273	3093	2794	2692	2729	3429	3322	4627	2247	2450	2628	4211	2496	4174	1789	3047	3489	3718	15.477	13.0525	12.9656	13.6425	11.7359	12.3083	10.9634	12.4476	15.5366	16.1806	8.97445	11.2861	12.7502	19.0805	10.3244	19.9546	9.14731	13.3029	16.1401	15.0537	0.727371	-0.0334935
ENSG00000060642	PIGV	312	292	266	281	270	245	285	376	263	410	191	261	232	379	319	329	158	270	281	382	3.78513	3.25201	3.052	3.40553	2.92127	2.62264	3.72099	3.3972	2.99132	3.47267	2.62386	2.96749	2.71286	4.70375	3.05537	4.08802	2.04538	2.79473	3.39055	3.69298	0.713272	-0.0374796
ENSG00000128656	CHN1	600	648	563	521	609	593	774	776	652	789	826	680	450	392	627	504	751	812	589	901	7.19978	7.35926	5.56616	5.67351	6.81071	6.93848	8.22947	7.1622	7.67603	6.7783	8.85654	8.21276	5.6733	4.39735	6.36874	6.08025	10.4781	8.79733	6.82481	9.1927	0.537319	0.0899832
ENSG00000128654	MTX2	1696	1900	2164	1893	1927	1944	2175	2466	2173	2554	2458	1958	2003	1721	2034	1637	1901	1841	1819	2077	30.6537	33.7162	33.6664	32.7642	30.9535	34.4566	34.2251	34.6835	40.2815	35.0743	38.6243	36.4068	38.4949	29.6512	32.9938	31.1255	38.4629	33.6143	32.7513	32.8332	0.923484	-0.00930579
ENSG00000173542	MOB1B	1111	1120	1465	1155	1370	1233	1485	1812	1877	1624	1381	1383	1081	1195	1605	1515	900	1168	1421	1322	4.04793	4.13453	4.72938	4.17724	4.6882	4.59293	4.88937	5.36236	7.16759	4.62905	4.49514	5.19791	4.27457	4.42612	5.41988	5.90755	3.75018	4.15378	5.35762	4.36327	0.505488	-0.0605637
ENSG00000157212	PAXIP1	296	272	277	255	279	233	248	349	352	333	216	293	237	250	243	237	220	307	362	306	1.87956	1.74515	1.55878	1.59743	1.66577	1.51158	1.43146	1.79866	2.35601	1.65587	1.22687	1.9189	1.63114	1.61087	1.42461	1.61484	1.59547	1.90676	2.37928	1.76366	0.657393	-0.0400461
ENSG00000157214	STEAP2	425	361	110	100	126	178	228	222	640	1185	361	602	268	813	296	807	311	746	472	1380	1.53052	1.34389	0.350061	0.354642	0.424334	0.653668	0.736989	0.69567	2.457	3.34171	1.16388	2.23451	1.04867	2.98046	0.987557	3.45889	1.2821	2.62552	1.78569	4.81067	0.0124024	0.870776
ENSG00000204099	NEU4	190	174	119	124	161	166	336	484	187	295	166	139	329	339	130	447	202	246	121	284	2.42408	2.14255	1.15217	1.34922	1.81264	2.30484	3.53248	4.91236	2.3442	2.64892	1.91832	1.6742	4.18443	4.1644	1.37036	5.68403	2.91343	2.67905	1.4893	2.99291	0.423549	0.208504
ENSG00000122033	MTIF3	2271	2570	2842	2538	2566	2424	2784	2684	2553	3686	2935	2595	1868	2932	2432	2078	2241	3139	2258	2726	56.886	65.1451	63.2338	62.5178	60.3386	62.3446	62.5142	54.8079	66.6883	71.9516	65.5683	66.5418	50.9459	74.5011	56.2197	55.6248	64.1577	76.5726	58.4036	61.7829	0.887851	-0.0129765
ENSG00000173548	SNX33	1409	932	1001	907	982	799	971	1155	1083	1612	482	822	721	1176	743	1202	563	1028	1405	1238	4.46316	2.9819	2.80871	2.83576	2.92315	2.58936	2.7645	2.97091	3.58897	3.99327	1.36397	2.68365	2.47911	3.77621	2.17614	4.0702	2.03945	3.18136	4.60479	3.55278	0.270138	-0.149398
ENSG00000137486	ARRB1	659	528	430	400	543	428	529	550	695	1125	461	463	316	713	511	698	278	607	551	738	6.36101	5.02367	4.01841	3.64808	4.7247	4.25969	4.31558	4.31752	7.23002	8.26311	3.805	4.28063	3.10542	6.67827	4.64694	6.60328	2.78763	5.29319	5.0143	5.87343	0.604746	-0.0715708
ENSG00000174013	FBXO45	578	436	704	543	582	565	398	704	602	730	537	462	435	478	562	463	355	466	478	558	2.48622	1.89406	2.68136	2.30481	2.35246	2.48343	1.53775	2.45872	2.71333	2.45226	2.06231	2.05449	2.0297	2.08068	2.23586	2.12692	1.7422	1.9856	2.12656	2.31017	0.0177422	-0.208842
ENSG00000158445	KCNB1	1223	1079	1242	1051	1052	842	1277	1686	1396	987	947	995	860	395	1118	1247	475	797	805	1338	2.61512	2.32734	2.35037	2.21342	2.12493	2.62585	2.50515	2.95681	5.68581	1.64734	1.86954	2.18971	2.01063	0.854969	2.22043	2.89893	1.15888	1.66761	1.77725	2.58828	0.0282365	-0.348526
ENSG00000044090	CUL7	541	498	620	645	510	487	591	743	543	633	569	674	470	461	490	815	300	599	665	917	2.56474	2.3766	2.62451	2.99337	2.30863	2.36497	2.5303	2.80853	2.69966	2.28072	2.35	3.31766	2.45141	2.16079	2.17543	4.111	1.57974	2.77619	3.29588	3.88361	0.472954	0.0768463
ENSG00000204323	SMIM5	76	64	82	78	69	46	64	51	66	67	56	71	49	81	64	56	53	120	51	69	0.799989	0.884385	0.76677	0.975889	0.861432	0.623299	0.8152	0.442683	0.776235	0.771523	0.618164	0.898251	0.556182	1.03036	0.876688	0.847977	0.74553	1.73419	0.832515	0.924792	0.65146	0.0787784
ENSG00000254004	ZNF260	573	512	619	610	537	553	594	670	661	768	471	572	666	540	529	586	460	686	626	611	2.71605	2.31219	2.49211	2.69326	2.25484	2.53128	2.39099	2.43973	3.09249	2.78893	1.91032	2.63891	3.23676	2.45912	2.19035	3.06295	2.4612	2.99369	2.89934	2.47567	0.962453	-0.00369524
ENSG00000130283	GDF1	279	99	134	97	353	85	137	207	79	574	111	356	386	316	90	521	62	159	162	179	2.81122	1.00736	1.19111	0.962475	3.34187	0.867214	1.24031	1.69329	0.830538	4.52388	0.997422	3.69559	4.22142	3.22215	0.838627	5.60876	0.713248	1.56524	1.68621	1.6264	0.398107	0.311195
ENSG00000087111	PIGS	1327	1281	1786	1292	1538	1382	1712	1844	1475	1519	1740	1374	1369	1169	1803	1394	914	1317	1476	1992	11.8048	11.6185	14.1326	11.684	12.9049	12.5868	13.9985	13.3554	13.7674	10.5771	13.9033	12.6237	13.3784	10.5872	14.8324	13.3775	9.35242	11.4808	13.6098	16.2227	0.982661	-0.00213826
ENSG00000154743	TSEN2	237	232	272	245	244	221	223	294	238	276	239	215	197	175	356	249	181	233	239	294	4.06959	4.12176	4.83072	3.98908	4.52089	4.27569	4.13449	3.73146	4.27533	4.45145	4.83157	3.41553	4.02999	3.04128	6.28054	4.8844	4.1009	3.81571	4.60217	5.65677	0.952191	0.00635272
ENSG00000159714	ZDHHC1	525	459	386	350	291	282	405	506	450	845	398	431	318	496	374	509	301	441	424	562	6.14688	5.47844	3.94306	4.04597	3.21097	3.39132	4.17856	4.80127	5.40939	7.71973	4.18929	5.14955	4.00645	5.89182	4.03549	6.21361	3.9469	4.93717	5.12364	5.93555	0.920004	0.0112511
ENSG00000159713	TPPP3	9266	8256	6790	7083	8146	6859	9788	12618	10752	14872	10061	9233	5482	11161	10044	11037	6015	9372	8592	10136	210.334	185.794	140.662	159.919	176.75	162.396	205.06	238.721	255.952	269.622	201.294	211.487	138.506	261.494	215.813	268.502	159.978	214.353	205.318	210.266	0.760991	0.0320605
ENSG00000121073	SLC35B1	1410	1469	1619	1464	1400	1442	1691	1651	1485	2017	1669	1616	1353	1585	1550	1189	1454	1352	1369	1658	23.9662	25.02	29.1551	24.1552	21.3198	26.8127	29.705	21.3848	24.2744	25.1237	23.6981	27.0692	23.6088	30.562	22.5821	20.3032	26.6779	22.8175	22.8447	24.117	0.923975	0.00850724
ENSG00000120306	CYSTM1	3017	3083	2665	2719	2777	2114	3106	2901	2653	4716	3290	2520	2595	3496	2961	2367	2659	3493	2545	3540	58.8775	60.6528	45.9328	52.014	51.0682	42.3082	55.1775	46.6188	53.6475	71.7198	56.9978	50.9537	54.8529	69.5948	53.8867	49.1145	60.7787	67.9892	51.2527	61.7678	0.428525	0.0795143
ENSG00000171574	ZNF584	284	264	309	228	251	270	287	415	230	380	233	241	255	274	264	236	176	285	267	266	3.2132	3.03916	3.26836	2.66831	2.89866	3.27536	2.96821	3.81922	2.89434	4.6184	2.48258	2.82667	3.25543	3.08027	2.7427	3.05992	2.61462	3.03245	3.12296	2.75388	0.105127	-0.144275
ENSG00000111404	RERGL	192	308	309	338	321	334	239	439	403	212	385	274	244	218	311	365	185	179	247	508	4.76272	7.74974	6.92595	8.40821	7.87347	8.39687	5.48562	8.87984	10.7614	4.18512	8.86018	7.22572	6.66043	5.55508	7.15221	9.69237	5.39636	4.31381	6.62376	11.5465	0.763033	-0.0540621
ENSG00000135502	SLC26A10	112	122	138	138	132	121	153	221	208	132	108	158	161	84	153	152	119	79	154	174	1.34103	1.44471	1.49453	1.5265	1.44314	1.50397	1.67138	2.24503	2.75117	1.18677	1.19766	2.06625	2.20452	0.974582	1.74055	1.94112	1.70773	0.919732	2.02852	1.81036	0.735784	-0.0562198
ENSG00000135503	ACVR1B	526	479	715	581	601	517	681	802	648	625	621	621	534	481	581	615	373	600	678	793	2.95255	2.72057	3.58154	3.23005	3.13434	2.94926	3.42284	3.64243	3.81535	2.71505	3.12111	3.58138	3.24043	2.72707	2.9802	3.90993	2.36899	3.29534	3.9224	4.00587	0.92918	-0.00747811
ENSG00000135506	OS9	5061	3953	4533	4163	4081	3618	4055	5138	4852	6488	3776	3679	3283	5184	4002	5088	2659	4474	4960	5075	49.4263	38.5932	39.8059	39.9997	38.3039	36.2212	36.6031	40.8771	50.3111	49.6219	32.6668	37.2908	34.5659	51.1387	36.2627	53.9529	30.9428	43.3046	51.7036	45.2552	0.37949	-0.055404
ENSG00000041802	LSG1	885	819	1025	923	847	764	661	894	843	810	853	769	763	754	792	956	481	683	890	825	6.30426	5.87073	6.45034	6.46536	5.64962	5.5439	4.23479	5.16463	6.3143	4.49662	5.4516	5.6277	5.87769	5.42578	5.20532	7.25809	3.90503	4.73627	6.53554	5.30809	0.435531	-0.0715676
ENSG00000174903	RAB1B	4608	4257	4184	3991	4205	3582	4017	5072	3965	6247	4513	4255	3739	4506	3983	4290	2991	4507	4576	5379	58.2559	54.4353	46.9747	49.787	50.0153	46.3129	45.6998	52.0808	52.4518	61.7754	51.0559	55.4365	51.3008	58.065	46.5939	57.9973	43.5447	55.6523	60.3851	61.6072	0.546682	0.026579
ENSG00000102763	VWA8	1607	1786	2628	2202	1983	1963	1962	2947	2301	1828	2193	2017	2229	1238	2072	1873	1376	1659	1800	2009	5.73224	6.45914	8.36603	7.72565	6.66475	7.1744	6.2923	8.59292	8.67239	5.19822	7.03175	7.40323	8.63486	4.49854	6.86015	7.14595	5.6266	5.7807	6.64369	6.4858	0.327494	-0.124817
ENSG00000102760	RGCC	992	858	2934	3136	2029	1834	1538	2169	1839	1673	2142	1171	2342	879	1723	1057	1054	969	1122	1321	26.2168	22.9039	68.728	81.7756	50.3782	49.5764	36.5229	46.5555	50.842	34.5825	50.5955	31.8928	67.1594	23.5337	42.1278	29.873	31.8582	25.0143	30.6623	31.6135	0.117725	-0.377202
ENSG00000198455	ZXDB	569	509	782	571	632	636	631	869	670	712	666	693	633	513	688	601	440	682	685	810	2.44878	2.21358	2.98126	2.42537	2.55579	2.79931	2.43987	3.03526	3.01617	2.39609	2.55912	3.07165	2.95636	2.23634	2.73703	2.76636	2.16416	2.86499	3.04742	3.15735	0.718978	0.0307281
ENSG00000198453	ZNF568	404	366	445	429	335	365	317	411	526	670	406	399	408	454	347	328	248	371	396	430	3.9414	3.59792	4.22614	4.3832	3.27154	3.88895	2.78432	3.35731	6.16237	5.56026	3.54772	4.48498	4.60147	4.45451	3.20877	3.50277	2.82343	3.4307	3.98178	3.76065	0.350982	-0.0873106
ENSG00000109790	KLHL5	1108	1130	1162	1136	1158	1053	978	1285	1475	1464	967	883	1143	935	973	990	813	991	903	1120	9.07797	9.28303	9.21227	9.14807	9.60097	8.79284	7.7206	8.46713	13.1617	9.2115	7.33801	8.41599	10.556	7.46576	7.80594	9.21108	7.78225	8.50055	8.20799	9.18481	0.00634353	-0.214898
ENSG00000109794	FAM149A	526	377	291	286	165	160	289	341	484	986	178	299	209	383	117	251	172	556	374	363	6.22918	3.86841	2.81153	3.39786	1.4638	1.60033	2.82127	3.20605	5.87929	8.91824	1.99708	3.59424	2.70479	4.2851	1.3253	2.81011	2.36357	6.36232	5.02195	3.69944	0.223997	-0.313142
ENSG00000147485	PXDNL	226	204	298	244	89	105	221	281	122	245	182	105	306	315	290	255	153	174	271	277	1.1933	1.08532	1.39152	1.26771	0.437449	0.564135	1.14191	1.4017	0.673206	1.00831	1.27271	0.706569	2.11555	1.68306	1.41322	1.56383	1.27239	0.896621	1.4781	1.32308	0.196284	0.27964
ENSG00000068885	IFT80	958	824	1069	879	716	852	808	987	1170	1378	786	1019	816	992	916	918	740	886	996	1159	6.24616	5.44595	6.27494	5.39186	4.34099	5.41408	4.66706	5.34495	8.07897	6.90568	4.40616	6.6029	5.90731	6.05583	5.39842	6.39432	5.44814	5.7593	6.79861	6.73197	0.77633	0.0195385
ENSG00000136856	SLC2A8	577	532	595	468	421	348	404	551	527	772	412	595	505	576	479	488	375	550	464	669	8.17631	8.14177	6.96364	6.19917	5.38291	5.11701	4.82157	6.44606	8.00832	8.11012	4.6479	7.98581	7.64973	7.64832	5.73653	6.80272	6.23227	7.81757	6.25355	8.34768	0.494446	0.0614361
ENSG00000136854	STXBP1	1271	1084	1012	1074	1007	1056	1054	1212	1139	1442	846	1008	929	1209	842	1211	660	1125	1423	1415	8.54551	7.68104	6.02775	7.28786	6.58423	7.57425	6.46571	6.86966	8.753	8.11815	5.15173	7.21356	6.8946	8.65264	5.11214	8.5985	4.98219	7.68765	10.1994	9.11159	0.651124	-0.0357764
ENSG00000132570	PCBD2	826	838	1103	761	1015	853	1073	1272	983	1036	1226	938	934	440	1020	833	693	1036	944	1019	8.69008	9.39569	10.1804	8.47002	10.5939	9.89947	11.5103	12.2738	11.9096	9.5301	10.6504	9.64487	11.1093	9.4422	10.195	9.57783	9.89106	11.9623	10.5194	10.1989	0.850793	-0.0255975
ENSG00000136859	ANGPTL2	2066	1760	2484	2005	2324	1966	1850	2232	3000	3368	1972	1870	2165	1611	2059	2619	907	1987	2428	3603	14.1415	12.1659	15.0705	13.5389	14.9439	13.7603	11.3832	12.405	21.4847	18.0522	12.0625	13.1909	16.0765	11.1726	13.0402	19.1679	7.10054	13.2834	17.1954	22.3405	0.571561	-0.0693748
ENSG00000065457	ADAT1	198	163	279	272	229	226	192	324	322	282	206	181	170	214	200	283	170	216	212	318	5.09218	5.6432	5.96167	6.41351	5.46166	7.12783	4.70227	5.63915	8.75422	5.43165	5.50742	5.45984	4.78661	5.12583	5.21144	5.96149	5.0811	5.37969	5.82775	8.35045	0.240402	-0.13136
ENSG00000172081	MOB3A	976	643	634	670	685	588	714	768	675	1127	634	607	507	789	608	730	385	881	808	883	7.41999	4.98004	4.27295	4.9807	4.91416	4.63317	4.97155	4.78912	5.32432	6.77518	4.25624	4.87415	4.19186	5.98935	4.37107	5.97607	3.37283	6.57834	6.33097	6.02287	0.474113	-0.0690932
ENSG00000172086	KRCC1	1255	1253	1391	1318	1301	1233	1547	1671	1629	2374	1338	1529	1178	1427	997	1252	1067	1500	1263	1650	18.1647	18.3218	17.8462	18.8206	17.6933	18.2437	20.1188	19.6444	24.6661	26.8788	17.3014	22.8104	18.4958	20.9299	13.3425	19.3664	17.6595	21.2052	18.9038	21.6325	0.236703	-0.0928692
ENSG00000108774	RAB5C	2535	2251	2117	2030	2380	1938	2039	2261	2326	3581	1920	2005	1773	2876	1900	2312	1557	2315	2490	2800	38.8664	34.3318	28.767	31.0868	34.3384	30.2862	27.9703	28.0613	37.2892	43.343	26.1324	31.5277	30.1217	44.6039	26.9562	38.0557	27.0836	34.3787	39.6734	38.7722	0.728427	-0.0262876
ENSG00000108773	KAT2A	1654	1453	1690	1553	1179	937	1181	1587	1433	1537	1774	1741	1125	1435	1595	2060	1014	1383	1736	1800	13.858	12.3942	12.5788	12.9597	9.31772	7.98985	8.88913	10.8254	12.6483	10.2013	13.3744	15.1259	10.3895	12.2658	12.4604	18.5391	9.75542	11.3638	15.1456	13.8301	0.0353076	0.200826
ENSG00000108771	DHX58	373	257	210	203	214	246	232	304	421	486	256	221	189	253	285	346	203	224	357	377	3.91774	2.80797	1.9943	2.1447	2.168	2.77736	2.26202	2.70311	4.48435	3.97284	2.46254	2.27095	2.05138	2.59299	2.68279	3.70851	2.30526	2.16388	3.7656	3.51644	0.771753	-0.0393812
ENSG00000146281	PM20D2	2192	2128	2396	1948	1893	2129	1572	2070	2164	2106	2010	2269	2332	2078	2288	2534	1536	2103	2216	2642	11.8113	11.5835	11.4412	10.3594	9.58499	11.7331	7.61178	9.06104	12.2018	8.87684	9.67745	12.6009	13.639	11.3486	11.4103	14.6004	9.4682	11.0693	12.358	12.8983	0.0630799	0.153834
ENSG00000146282	RARS2	1110	1117	1042	944	1032	869	1181	1333	969	1377	935	1011	1023	1179	1076	969	619	1216	1061	1284	15.4829	15.7663	13.0145	13.1263	13.5313	12.4423	14.8273	15.1047	14.2532	15.2869	11.7223	14.5729	15.5997	16.7488	14.0023	14.536	9.88903	16.6028	15.3409	16.228	0.832118	-0.0151912
ENSG00000063854	HAGH	2804	2813	4086	3792	2399	2235	3081	3632	2710	3629	3125	3175	2190	2882	3010	2792	2230	3313	2532	3409	42.4364	43.4885	56.8883	59.7024	35.8072	31.4236	38.4667	40.48	38.4496	45.0089	43.1053	41.9089	46.5449	45.2517	42.2109	45.989	40.6749	56.4073	37.956	40.3446	0.616706	-0.0478847
ENSG00000066379	ZNRD1	445	421	217	232	430	356	303	269	277	536	505	269	238	373	273	220	289	366	320	447	13.7299	12.9481	5.97733	7.15538	12.5855	11.2638	8.34905	6.74935	9.05793	13.0988	14.113	8.45613	7.88734	11.8628	7.78043	7.25196	10.2223	10.9492	10.0185	12.3383	0.948776	-0.0114721
ENSG00000132394	EEFSEC	602	502	619	613	525	411	644	820	640	822	573	544	488	555	537	457	382	619	643	732	6.84266	5.75417	6.23585	6.87595	5.59874	4.77511	6.58028	7.5859	7.60467	7.30314	5.82679	6.36866	6.02777	6.38945	5.66753	5.55322	4.95975	6.87966	7.56332	7.55213	0.258187	-0.0865522
ENSG00000145390	USP53	2988	2880	3099	2426	2685	3022	3588	4187	3637	4762	2480	3580	2096	2923	2053	3012	2078	2672	3845	3316	12.4876	12.1648	11.4803	10.0119	10.5915	12.9305	13.5174	14.2669	15.9086	15.5822	9.30213	15.4215	9.53019	12.3799	7.94054	13.4825	9.92862	10.9497	16.6819	12.5804	0.0765431	-0.169167
ENSG00000145391	SETD7	12764	13349	20036	14232	15386	14378	16006	22017	17138	17841	18273	14946	17920	14322	16635	18350	10676	15031	15701	19541	44.4656	46.9825	61.762	48.7948	50.3581	51.089	50.0862	62.2729	62.5844	48.6268	57.2018	53.6543	67.4272	50.6774	53.7738	68.0485	42.9625	51.0614	56.6696	61.5264	0.509702	0.0565773
ENSG00000133627	ACTR3B	335	379	416	295	347	345	334	450	336	540	377	274	180	346	303	358	241	323	282	506	4.02018	4.797	4.31148	3.44436	3.80789	4.66127	3.59154	4.36735	4.0234	5.24366	4.05169	4.01914	2.32062	4.06426	3.31658	4.46401	3.42892	3.7007	3.41095	5.2426	0.0867682	-0.180246
ENSG00000138639	ARHGAP24	689	646	637	649	826	723	800	888	966	1038	997	899	650	788	825	983	520	999	813	1119	3.78142	3.56652	3.30037	3.81376	4.26419	4.59549	4.18697	3.94724	5.54748	4.69829	4.8599	5.05048	3.83989	4.38078	4.16441	5.73278	3.24807	5.58984	4.62595	5.54808	0.0243492	0.189054
ENSG00000139946	PELI2	390	454	298	334	366	409	362	379	434	473	328	415	272	479	280	349	196	405	420	534	1.80767	2.2354	1.13053	1.49085	1.64059	1.81845	1.47347	1.41086	2.05456	1.6798	1.29102	1.83495	1.32479	2.15638	1.17012	1.69657	1.02214	1.74998	2.10752	2.18925	0.696279	-0.0448609
ENSG00000120008	WDR11	1080	1002	1155	869	839	808	1035	1145	1167	1308	898	1118	852	1118	981	1226	731	945	1106	1169	5.73246	5.30609	5.39686	4.54579	4.18911	4.37292	4.9319	4.90909	6.43789	5.43398	4.22108	6.07953	4.89868	5.94824	4.76301	6.96013	4.41675	4.82715	5.9909	5.59803	0.518996	0.0359305
ENSG00000101442	ACTR5	208	186	218	211	170	140	186	252	227	280	161	189	138	199	169	276	149	209	214	246	2.05784	1.85647	1.90406	2.05699	1.57812	1.40788	1.64745	2.01935	2.34587	2.16501	1.42296	1.91901	1.47361	1.99404	1.54028	2.91533	1.67913	2.0106	2.18913	2.19865	0.831591	-0.019041
ENSG00000101443	WFDC2	1386	1227	357	391	394	368	822	723	550	616	927	1415	891	670	751	520	590	1430	844	1049	55.5079	49.9411	12.8809	15.8293	15.0568	15.3292	30.1786	23.4045	22.9065	19.4436	32.9899	59.6286	39.4771	27.8653	27.5573	22.7146	27.6841	57.264	34.3599	37.8092	0.0631212	0.473775
ENSG00000115896	PLCL1	709	720	1061	804	717	777	636	766	721	774	566	840	738	615	546	711	495	654	726	933	3.2235	3.32451	4.14727	3.60884	3.05021	3.68419	2.61224	2.84568	3.43363	2.61365	2.14072	3.92086	3.65483	2.79651	2.12594	3.677	2.3898	2.83421	3.43925	3.72943	0.280985	-0.11573
ENSG00000101445	PPP1R16B	622	643	903	874	941	865	666	1011	1196	739	924	470	903	398	865	979	403	546	857	677	2.52318	2.63292	3.24538	3.49704	3.58698	3.59108	2.4283	3.33268	5.07691	2.34426	3.35001	1.96589	3.97662	1.63452	3.2454	4.24793	1.86746	2.16091	3.59929	2.48686	0.240721	-0.208823
ENSG00000214063	TSPAN4	2373	1788	1355	1293	1456	1335	1761	1788	1572	3750	1440	1592	1226	3103	1451	2090	1189	2006	2640	1844	43.6796	33.597	21.9507	23.9963	24.9149	24.7745	29.03	26.321	29.9439	54.3877	23.5913	32.0357	24.2543	58.5325	24.8965	41.8796	24.8394	37.0521	51.3406	30.3776	0.544584	0.0967218
ENSG00000172339	ALG14	183	175	115	137	151	147	236	223	208	405	174	197	165	158	147	170	164	137	131	172	0.495511	0.478386	0.275086	0.365173	0.383394	0.404982	0.573549	0.490378	0.588544	0.858155	0.420974	0.547434	0.482256	0.432294	0.366531	0.490816	0.507231	0.36229	0.36512	0.421164	0.282719	-0.16905
ENSG00000137814	HAUS2	440	432	533	394	407	406	448	562	580	658	400	484	460	428	463	399	378	480	517	578	3.51658	3.37189	3.23366	2.73129	2.7041	2.89029	3.04621	3.17549	4.05499	3.61482	2.72542	3.78552	3.48861	3.01952	3.00755	2.99324	2.95611	3.15423	3.8672	3.59524	0.977772	0.00201434
ENSG00000137815	RTF1	2282	2158	2821	2432	2242	2251	2557	3430	2795	2938	2874	2532	2404	2241	2642	2949	1734	2514	2717	3323	11.5427	11.0957	12.6939	12.163	10.6495	11.6511	11.6153	14.0906	14.7991	11.6273	12.9936	13.2232	13.2035	11.4861	12.3559	15.9946	10.0909	12.4151	14.2485	15.2172	0.260334	0.0687461
ENSG00000137817	PARP6	1114	946	1073	888	653	703	842	1056	924	1524	825	880	741	1013	857	902	646	961	1148	1193	11.4936	9.80301	10.5849	9.49151	6.75242	7.51527	7.91524	9.46045	9.92793	12.7941	7.86079	10.0687	8.66354	10.9204	9.0911	10.4408	8.02109	9.83381	12.3088	13.0712	0.952643	-0.00486626
ENSG00000137818	RPLP1	27215	27094	18316	22156	14652	15709	26058	19892	15442	45096	23964	22308	18569	36467	19248	15554	25044	30132	21413	23818	629.204	638.846	374.255	469.855	319.115	376.158	555.705	383.072	375.547	811.341	458.911	539.741	465.359	861.804	422.071	366.75	654.475	643.209	572.958	510.015	0.406056	0.146242
ENSG00000137819	PAQR5	62	67	16	22	45	43	54	87	35	26	29	60	40	56	11	88	17	38	50	64	0.292628	0.319452	0.065375	0.100368	0.20069	0.205436	0.228252	0.335562	0.169912	0.096254	0.121499	0.291312	0.205987	0.269283	0.04819	0.445134	0.087629	0.175473	0.243282	0.273301	0.997378	0.00107589
ENSG00000172331	BPGM	650	531	580	555	479	502	718	696	658	1085	689	557	516	596	569	475	566	667	543	759	9.40281	7.69299	7.41672	7.89548	6.50723	7.42337	9.22437	8.18014	9.96048	12.2822	8.91408	8.30017	8.10342	8.72607	7.61489	7.1526	9.34609	9.4163	8.01504	9.92104	0.861579	-0.0176798
ENSG00000172336	POP7	705	747	726	747	675	620	692	813	584	1077	827	726	619	731	643	756	581	738	633	816	19.2746	20.6312	17.5956	20.1518	17.3525	17.3301	17.0437	18.065	16.7074	23.0473	20.225	20.4702	18.3715	20.2573	16.2795	22.1022	18.1725	19.7195	17.9075	20.2184	0.816243	0.0172042
ENSG00000173068	BNC2	677	540	256	245	315	295	356	360	576	945	193	425	182	637	297	601	216	514	774	667	1.3533	1.11376	0.45166	0.484998	0.588602	0.600659	0.644103	0.638172	1.28104	1.49363	0.34003	0.864396	0.390098	1.28462	0.577355	1.27007	0.48634	1.01178	1.59068	1.19411	0.86839	0.0413472
ENSG00000173065	FAM222B	434	364	583	462	438	378	391	587	370	418	376	390	373	292	393	403	322	379	381	483	3.10084	2.60609	3.79808	3.27776	2.6488	2.54317	2.19956	3.24986	2.8896	2.34537	2.06512	2.58637	2.7651	2.00211	2.36268	2.69608	2.40801	2.41214	2.58982	3.23862	0.146493	-0.152295
ENSG00000173064	HECTD4	2249	2030	3102	2613	2143	2097	1921	2840	2681	2061	2592	2803	2270	1651	2506	3085	1356	1880	2638	2632	3.69389	3.36554	4.52599	4.14898	3.32101	3.45194	2.82821	3.78123	4.54219	2.59589	3.79851	4.80721	4.03091	2.70637	3.74111	5.64877	2.76555	2.99695	4.6971	3.90651	0.780193	0.0334645
ENSG00000138092	CENPO	263	193	252	160	112	116	202	285	206	506	261	246	198	105	238	281	175	216	252	264	1.55784	1.14292	1.28891	0.912307	0.605961	0.682157	1.04568	1.33746	1.24558	2.33015	1.34885	1.46626	1.24028	0.614357	1.27078	1.76569	1.15426	1.21841	1.50426	1.37909	0.632646	0.0891379
ENSG00000138095	LRPPRC	5969	6137	9145	6725	7140	7294	6780	9153	7161	6926	6896	6978	7489	5070	7633	6974	5373	5897	6715	6639	24.1481	24.9616	32.6647	26.7004	26.926	30.1406	24.5041	29.9753	30.1086	21.7436	24.7229	29.1027	32.6079	20.6615	28.4191	30.2024	24.7051	23.2827	28.0008	24.2015	0.550912	-0.0640966
ENSG00000267855	NDUFA7	2109	2494	1964	2049	1783	1693	2762	2020	1513	3610	2133	1823	1842	2624	2212	1314	2209	2924	1716	1861	89.1665	106.772	73.8348	86.0346	70.9415	73.1633	105.046	69.3556	66.9935	119.334	80.6872	79.3539	84.6088	112.765	86.801	60.2286	106.845	120.574	75.3965	71.6435	0.90362	0.0192343
ENSG00000132330	SCLY	358	312	382	282	362	322	430	398	300	413	339	266	278	250	254	307	236	325	313	337	3.64099	3.12629	3.50858	3.03969	3.4493	3.45007	4.06643	3.53285	3.42507	3.40808	3.22124	2.96897	3.27491	2.6268	2.58072	3.38459	2.77307	3.28012	3.68217	3.15649	0.0123258	-0.222214
ENSG00000054148	PHPT1	4418	4769	3892	4387	3823	3734	5810	4397	2674	6813	4324	3843	3657	5157	3940	3112	4027	5303	3503	4008	125.591	137.065	98.133	123.234	102.214	108.708	148.56	101.556	79.4386	151.639	109.802	112.577	112.83	148.697	103.578	94.685	131.129	147.315	102.997	103.157	0.80613	-0.0344358
ENSG00000085224	ATRX	1593	1778	2222	1826	1871	1906	1806	2245	2696	2447	2069	2116	1752	1956	2021	2436	1633	1961	2069	2441	4.04466	4.49638	4.83282	4.60977	4.59566	5.14754	4.21776	4.68046	7.43632	5.22155	4.82355	5.66449	4.84135	5.31107	4.63653	6.92575	4.7395	4.88876	5.53732	6.07084	0.258529	0.0780054
ENSG00000144118	RALB	2309	2202	2463	2459	2411	2257	2432	2833	2536	3674	2191	2142	2198	2510	2139	2031	1621	2424	2391	2469	25.3428	24.4425	24.2549	26.5764	24.9161	25.3661	24.3116	25.3652	29.1226	31.4427	21.3747	24.1434	26.4008	27.9225	21.7491	24.1856	20.4712	25.8874	27.1623	24.5745	0.0183115	-0.129178
ENSG00000144115	THNSL2	1742	1671	2208	1716	1678	1625	944	1253	1966	2307	1558	1893	1259	388	1083	361	1304	1738	1345	1979	17.4299	16.6032	19.9879	18.2665	12.7563	15.6133	7.93039	8.93304	19.7872	18.396	14.1048	19.3082	13.9748	2.94992	10.2132	3.04018	15.0164	14.7628	13.9464	17.4391	0.204387	-0.319573
ENSG00000100311	PDGFB	951	851	1720	2055	1664	1530	1306	1938	1937	1334	1861	809	1476	646	1390	1223	876	940	1113	1416	6.89575	6.29102	11.0768	14.773	11.3402	11.3816	8.56991	11.4189	14.7143	7.59485	12.0653	6.15358	11.6158	4.75085	9.328	9.64728	7.26854	6.69559	8.41445	9.29944	0.106654	-0.310638
ENSG00000150433	TMEM218	348	321	339	265	316	305	403	351	422	556	420	329	261	500	386	358	234	314	440	378	5.83207	6.49734	5.77288	4.70383	6.88596	5.27052	7.79871	5.49953	8.93454	7.78495	8.91828	6.02135	5.07059	10.0133	8.26373	8.41213	6.11943	6.18157	8.67021	6.24462	0.471478	0.0739684
ENSG00000100316	RPL3	34685	25915	16667	22281	18451	16224	24859	21624	22604	56950	16937	25710	15942	43047	19043	20936	17464	30578	30495	26762	612.792	471.299	265.131	396.432	314.074	294.93	394.081	325.573	424.528	794.54	269.192	472.97	313.156	771.305	316.313	395.584	359.465	528.932	562.704	428.187	0.901866	0.0222248
ENSG00000100319	ZMAT5	453	369	302	315	307	259	443	535	382	642	352	316	311	408	278	334	328	336	357	383	12.7753	10.5134	7.55506	8.77048	8.13098	7.45099	11.2173	12.2453	11.2531	14.175	8.86946	9.16573	9.50446	11.6558	7.23731	10.0767	10.5587	9.24607	10.4087	9.77188	0.248259	-0.129861
ENSG00000104679	R3HCC1	1262	1029	906	803	907	781	1020	1077	779	1545	1018	1005	833	1101	984	1010	676	948	971	1242	18.4255	15.2676	11.8228	11.7343	12.5344	11.9904	13.5196	12.7217	11.8633	17.5474	13.3061	15.3799	13.2644	16.2893	13.317	15.773	11.3532	14.8421	14.6263	16.4802	0.729121	0.0285373
ENSG00000238227	TMEM250	1063	933	1055	892	744	726	999	1187	887	1310	915	863	850	1061	1078	1168	587	1167	1109	1253	9.61898	8.72393	8.67166	8.06539	6.34377	6.94226	8.36281	8.77566	8.49863	9.36257	7.55264	8.4896	8.36082	9.98912	9.03231	11.3178	6.33014	10.3549	10.7485	10.344	0.14325	0.104283
ENSG00000156876	SASS6	123	108	125	110	116	123	179	121	139	180	129	136	94	150	141	144	127	102	103	157	0.801279	0.707657	0.723314	0.703495	0.711556	0.818177	1.05069	0.639378	0.949645	0.918246	0.751142	0.916494	0.665429	0.990953	0.85199	1.00273	0.942832	0.646084	0.691925	0.926277	0.777927	0.0347617
ENSG00000156875	MFSD14A	1192	1359	1537	1353	1668	1554	1365	1747	1820	1399	1605	1290	1461	1446	1451	1424	965	1472	1473	1800	10.8849	12.5435	12.4465	12.1906	14.3213	14.5158	11.2055	12.9632	17.3956	9.99699	13.0999	12.1468	14.4797	13.3904	12.2623	13.9125	10.0791	13.1311	13.9226	14.8926	0.957223	-0.00486078
ENSG00000172687	ZNF738	177	142	193	152	166	163	221	296	174	218	263	218	203	165	243	232	172	204	189	190	1.88362	1.51021	2.14635	1.87089	1.98533	1.92056	2.17173	2.93846	2.28058	2.37372	2.65551	2.80724	2.66256	1.90901	2.63307	3.14677	2.44203	2.52268	2.5867	2.18776	0.0725031	0.2195
ENSG00000182934	SRPRA	3217	2857	3539	3015	3271	3040	3227	4106	3651	3986	3016	2970	2752	3049	2967	3459	1889	2973	3239	3969	26.6045	23.9236	25.9291	24.5977	25.4074	25.7014	23.9796	27.608	31.5848	25.7741	22.2796	25.4361	24.6904	25.5529	22.7229	30.6076	17.8577	24.0068	27.711	29.7212	0.0196684	-0.102251
ENSG00000064199	SPA17	72	102	69	70	65	62	117	112	87	163	80	41	38	93	74	86	53	68	72	80	1.3742	1.39643	0.766624	1.05761	0.786856	1.15106	1.25016	1.39133	1.04061	2.26686	1.40047	0.516252	0.738636	1.19887	0.4767	1.09854	0.793419	1.00372	1.4729	0.969751	0.0451911	-0.337598
NewGene_9389	NewGene_9389	228	199	260	235	178	208	130	372	266	403	200	276	222	243	278	344	187	215	324	262	2.06007	2.08789	2.17002	2.23812	2.13555	1.96509	1.06835	3.40323	2.94149	3.06863	2.11172	2.8334	2.2682	2.38257	2.58594	3.71941	2.22857	2.78992	3.32211	3.1874	0.307096	0.137452
ENSG00000086758	HUWE1	3929	3597	5673	4748	4043	4023	3932	5763	4621	4115	4154	4372	3985	3140	4135	5220	2371	3723	4429	4959	14.4027	13.928	17.3379	16.0517	15.0963	17.1725	11.8932	16.5144	16.0157	12.8389	16.7379	18.3268	16.3097	12.7588	14.9523	15.9839	11.1954	13.3632	17.8919	18.9236	0.418229	-0.080682
NewGene_9385	NewGene_9385	124	92	70	44	68	86	117	76	75	113	111	54	58	101	83	65	72	62	77	78	5.25354	3.91502	2.60034	1.80854	2.71085	3.71988	4.44825	2.60857	3.31552	3.73601	4.2029	2.3194	2.63937	4.33715	3.2294	2.92962	3.44729	2.53696	3.33916	2.99191	0.578361	-0.104099
ENSG00000175946	KLHL38	1002	1272	1575	1063	1114	1119	1006	1544	952	652	1185	1228	915	848	1327	1423	659	729	987	1216	12.8278	16.4482	17.8637	13.4258	13.3954	14.6436	11.5737	16.0488	12.7437	6.52238	13.5561	16.1958	12.7016	10.9986	15.7182	19.4772	9.64558	9.11222	13.0659	14.0916	0.696234	-0.062746
ENSG00000169660	HEXD	839	816	860	776	582	599	712	1055	757	1152	998	904	735	720	664	906	665	692	908	845	11.3249	10.5844	10.9272	9.9238	6.93108	8.04676	8.30457	10.9918	10.7246	12.1634	12.0868	12.2871	10.229	9.8783	8.46503	12.3986	10.3724	8.57775	12.2628	9.58403	0.425318	0.0721141
ENSG00000156299	TIAM1	515	365	357	225	456	419	704	749	575	862	276	603	354	620	655	513	356	508	707	417	2.6477	1.30164	1.14573	0.798843	2.42094	2.4428	3.41505	3.33372	2.1706	2.37895	0.86754	2.20663	2.07672	3.4812	3.5135	2.73978	1.44094	1.75015	4.17944	2.16017	0.834992	0.0389675
ENSG00000156298	TSPAN7	7678	7937	10040	8494	9513	9467	8667	10839	8316	9184	9716	9075	8953	7424	10998	8495	5528	8820	8238	10524	102.064	106.633	118.283	111.401	118.819	128.695	104.745	117.038	115.669	95.4856	115.477	124.325	129.178	100.145	135.339	120.777	84.0368	114.507	113.416	126.918	0.83662	0.0195124
ENSG00000168398	BDKRB2	350	251	98	128	172	135	114	153	177	257	71	140	57	456	87	299	116	179	278	273	2.26593	1.41511	0.447742	0.467122	0.985548	0.511419	0.376772	0.457952	1.15972	1.26495	0.232159	0.533614	0.271839	2.47771	0.315603	1.61759	0.488045	0.647651	1.54861	1.51961	0.695584	0.120468
ENSG00000168393	DTYMK	432	309	240	224	210	247	268	297	191	532	285	222	194	351	307	277	186	366	307	323	9.51879	6.74921	4.55201	4.67952	4.19568	5.54068	5.36618	5.24783	4.35123	8.72808	5.542	5.03683	4.69276	7.55208	5.93862	6.63752	4.54825	7.53806	6.81135	6.29133	0.921621	0.0144375
ENSG00000168397	ATG4B	1313	1189	1183	1091	1072	944	1166	1587	1228	1658	1294	1136	956	1163	1248	1345	821	1195	1226	1234	11.7383	11.1942	9.8067	9.69461	8.99709	8.55682	9.8903	11.4564	12.4482	12.1999	10.1868	12.2368	9.19501	10.7355	13.1666	12.7606	8.85306	10.9852	11.3212	9.5102	0.730241	-0.0189044
ENSG00000168395	ING5	1354	1268	1535	1381	1275	1256	1453	1852	1254	1709	1727	1403	1242	1244	1380	1505	1069	1341	1519	1764	7.5308	7.34956	7.77065	7.75438	6.762	7.28927	7.59579	8.42987	7.4632	7.78393	8.74101	8.36645	7.85372	7.35571	7.29198	9.07267	6.99022	7.46855	8.74868	9.24383	0.385013	0.0563846
ENSG00000168394	TAP1	996	799	1283	1236	1158	991	1095	1335	2129	1879	1074	732	970	942	1103	1582	765	679	1092	1579	8.54164	6.91751	9.74754	10.4582	9.32784	8.68778	8.43693	9.29591	19.1011	12.6012	8.22603	6.46943	9.02163	8.18361	8.74658	14.5015	7.49521	5.68556	9.68649	12.2658	0.135352	-0.217524
ENSG00000197822	OCLN	109	93	52	69	63	73	23	37	78	65	41	92	45	78	71	88	40	45	123	105	0.427249	0.388899	0.181387	0.268356	0.23102	0.293551	0.078774	0.116719	0.595861	0.199523	0.141394	0.623407	0.188499	0.309756	0.257079	0.369773	0.17709	0.173041	0.499077	0.371949	0.550084	0.153878
ENSG00000180425	C11orf71	468	524	589	454	538	472	717	742	552	786	608	481	465	589	504	472	438	691	528	717	5.9981	6.77756	6.67978	5.72998	6.47415	6.18386	8.25922	7.71334	7.39501	7.8723	6.95707	6.35173	6.4554	7.64254	5.96812	6.45529	6.41303	8.64292	6.99913	8.32054	0.918659	-0.0094018
ENSG00000180423	HARBI1	53	78	73	64	82	32	59	76	71	69	61	69	50	75	91	59	55	55	54	61	0.708251	1.01218	0.830623	0.81358	0.988125	0.4048	0.682607	0.820997	0.964715	0.691118	0.693985	0.91229	0.710217	1.06134	1.07586	0.803555	0.906477	0.703119	0.714142	0.730738	0.906038	0.0193486
NewGene_8386	NewGene_8386	1408	1440	1612	1298	1370	1335	1305	1726	1766	2091	1409	1693	1269	1402	1425	1532	1243	1438	1553	1920	8.03436	8.26383	8.24724	7.44793	7.31595	7.75382	6.82568	7.99711	10.6082	9.37298	7.34636	9.97179	7.88701	8.2375	7.49089	9.51249	8.1494	8.11254	9.16102	10.0628	0.519034	0.035628
ENSG00000103152	MPG	894	911	845	807	757	703	993	1060	899	1855	879	755	651	1123	806	857	665	1084	1046	1229	18.8031	19.3639	15.7548	16.7686	14.9586	15.1338	18.7903	18.1141	19.8109	30.5705	16.52	16.3761	14.8646	23.9681	15.6813	19.2873	15.9965	22.284	22.787	23.4293	0.942878	-0.00744839
ENSG00000103150	MLYCD	1461	1352	2541	2261	1003	838	2184	2889	2081	2350	1521	1697	2453	2269	3643	3180	1463	965	1960	1673	2.84355	2.65794	4.38173	4.34079	1.83361	1.66693	3.82003	4.56614	4.23744	3.57669	2.64394	3.40223	5.18047	4.47513	6.56063	6.61759	3.25676	1.83348	3.94688	2.949	0.265137	0.243843
ENSG00000123505	AMD1	2222	2142	2697	2157	2259	2283	2209	2522	1966	2657	2100	2350	1984	2294	1711	1973	1526	2710	2227	2536	16.4002	16.282	17.6979	15.7974	15.8969	17.2322	14.6526	15.1175	15.3284	15.3411	14.1185	17.9005	15.885	17.1568	11.6837	15.5694	12.8814	19.5362	17.2105	17.0581	0.538173	-0.0483715
ENSG00000153187	HNRNPU	10092	9249	10565	9034	8709	8373	9044	10601	11038	11466	10145	11073	9399	8901	11393	11484	7339	9173	11120	11996	44.6258	40.1262	40.3351	38.5345	33.2446	36.8969	34.8544	36.0897	51.2418	38.2608	38.914	49.2084	44.4655	40.4803	44.6653	51.8795	36.9945	40.0736	48.2572	48.9224	0.0191336	0.125314
ENSG00000013523	ANGEL1	819	708	957	813	886	847	829	1248	973	967	977	865	978	689	1041	1100	570	755	1051	952	4.39979	3.75928	4.44887	4.32588	4.18268	4.34652	3.69442	5.26322	5.56433	3.96125	4.43611	4.58335	5.588	3.67825	5.07944	6.9321	3.54881	3.81377	5.78601	4.69398	0.551732	0.0591478
NewGene_8034	NewGene_8034	66	45	25	47	39	24	20	21	55	55	52	65	48	45	42	24	34	41	59	26	1.2057	0.853416	0.401972	0.876408	0.952392	0.443807	0.316471	0.32046	1.29761	0.822091	0.833603	1.22683	0.991259	0.830168	0.690302	0.453132	0.762405	0.720647	1.2479	0.426774	0.384431	0.226733
ENSG00000068745	IP6K2	1389	1277	1319	1245	1253	1149	1393	1624	1393	1844	1408	1347	1108	1463	1451	1331	1004	1510	1567	1610	22.6179	21.0272	18.098	19.5171	19.0357	18.9657	20.1877	22.4212	23.4061	23.7558	21.0632	21.9954	19.0285	23.9853	21.3189	22.6008	18.3057	24.178	26.0495	23.2999	0.134471	0.0647258
ENSG00000168538	TRAPPC11	1122	1164	1343	1193	1214	1123	1155	1348	1431	1521	1081	1184	1067	1224	1169	1383	905	1223	1301	1413	6.26555	6.58024	6.65588	6.5841	6.37729	6.40562	5.80152	6.14047	8.36573	6.64482	5.48014	6.89209	6.47148	6.92329	6.03962	8.25117	5.77258	6.66229	7.51445	7.15239	0.833713	-0.00935752
ENSG00000065717	TLE2	2891	2324	2098	1997	1607	1439	2575	2768	1748	2678	2333	2077	1637	2552	1882	2377	1534	2346	2267	2745	29.0164	23.3806	18.5618	18.934	14.8169	14.4103	22.6856	21.703	18.4324	20.7028	20.1038	21.163	17.2586	25.5387	16.5291	25.2861	17.333	22.5667	23.3595	24.1039	0.667866	0.0428193
ENSG00000163704	PRRT3	285	269	428	403	306	359	322	551	272	383	329	366	312	228	375	421	211	375	413	452	2.07231	1.83676	2.59821	2.71456	1.95091	2.49308	1.97745	3.05769	1.92699	2.04054	1.98515	2.59209	2.44659	1.58802	2.36319	3.05144	1.64115	2.50512	2.93126	2.76117	0.886499	0.0183391
ENSG00000184428	TOP1MT	207	131	130	140	106	112	155	162	164	239	124	105	117	139	93	118	122	146	123	132	2.75208	1.76743	1.56252	1.89893	1.30581	1.56712	1.97205	1.70827	2.37124	2.52231	1.46402	1.38227	1.75232	1.83169	1.14257	1.72295	1.87708	1.85876	1.78184	1.54405	0.0492494	-0.244037
ENSG00000163701	IL17RE	42	74	39	34	30	30	20	46	47	59	45	63	51	44	21	66	18	48	73	53	0.376435	0.669441	0.308526	0.294973	0.246877	0.279294	0.156504	0.340345	0.447756	0.414192	0.360472	0.59567	0.514402	0.398285	0.199085	0.629756	0.185845	0.431193	0.693599	0.443306	0.283433	0.251372
ENSG00000163703	CRELD1	1436	1094	1517	1600	1262	1184	1391	2132	1627	1783	1839	1347	1151	1217	1443	1639	902	1327	1419	1776	17.5153	13.6987	16.9378	19.6831	13.2383	15.5717	14.5019	21.9185	20.7445	16.1592	21.2883	17.6791	14.4525	12.9891	16.2293	22.074	12.575	14.4251	18.0471	20.7065	0.763452	-0.0260794
ENSG00000167881	SRP68	2273	2004	2616	2058	2249	2088	2424	2925	2173	2484	2532	2218	1950	2084	2154	2260	1408	2305	2258	2764	22.3545	20.2243	22.8893	20.3144	21.0666	21.4772	21.4386	23.5819	22.4563	19.362	23.361	22.4814	21.4011	20.8375	20.0578	25.1988	15.7937	22.4614	23.5224	25.4412	0.666571	-0.0269176
ENSG00000055950	MRPL43	1868	1896	2165	1871	1587	1539	1998	1853	1776	3098	2050	1899	1680	2191	1802	1436	1425	2067	1888	1983	47.7792	49.4098	48.4082	49.8014	39.2007	40.8098	45.6504	38.5213	46.5625	65.925	46.9355	52.1964	48.4779	56.3357	42.909	37.748	40.4493	53.3786	48.1683	48.5344	0.963597	-0.00391048
ENSG00000055955	ITIH4	140	172	111	173	63	94	111	110	193	145	122	115	95	120	158	244	77	79	157	149	1.16791	1.44246	0.840723	1.37128	0.499785	0.836095	0.804119	0.762754	1.62139	0.958519	0.879555	0.992269	0.855299	0.96366	1.19792	2.17405	0.719075	0.622577	1.31074	1.12159	0.790467	0.052705
ENSG00000136840	ST6GALNAC4	1015	1058	1099	922	1028	811	833	1162	914	1733	1398	862	847	1110	1093	1176	825	1066	1088	1500	16.168	16.6767	14.7539	14.0363	14.9312	12.8442	11.2239	14.154	14.3443	20.4057	19.1684	13.6508	13.811	17.745	15.1712	19.1321	14.3397	16.6566	16.9015	21.2908	0.137816	0.132005
NewGene_11383	NewGene_11383	2399	3466	7316	5875	3775	4419	4624	5261	3923	3944	5173	4800	5847	4873	3447	3586	4711	4758	2906	2736	7.22774	9.31016	17.7019	15.4688	9.85389	12.1718	11.0788	12.3132	10.5524	8.06049	12.2737	12.9658	17.5216	12.5426	9.35679	10.6447	15.1635	11.8901	8.02409	6.91152	0.868128	0.033745
ENSG00000137216	TMEM63B	1231	939	1748	1331	1353	1203	1205	1741	1301	1131	1119	1002	1050	716	1126	1294	658	960	1296	1132	9.80506	7.69596	12.22	10.6816	10.2046	9.99832	8.56588	11.3371	10.5437	7.37459	8.32034	8.10951	9.33367	6.01466	8.38192	11.5168	6.11611	7.55015	10.8518	8.58231	0.0156626	-0.29048
NewGene_291	NewGene_291	65	101	71	75	70	77	82	105	131	134	66	93	73	73	103	87	69	55	126	109	1.16663	1.80996	1.25545	1.54193	1.06787	1.35466	1.26949	1.31715	2.06125	1.94929	1.06371	1.46568	1.67869	1.30058	1.15433	1.19764	1.41029	1.01085	1.78957	1.36699	0.941291	-0.0112644
ENSG00000115137	DNAJC27	469	523	636	616	557	457	590	584	544	529	618	611	544	501	604	569	432	541	598	624	2.39012	2.7024	2.89094	3.15198	2.71283	2.40204	2.74813	2.45751	2.95997	2.1074	2.9377	3.21926	3.07088	2.68759	2.88936	3.19934	2.53598	2.70285	3.18764	2.95626	0.254166	0.099623
ENSG00000136848	DAB2IP	2059	1960	3070	2861	2452	1934	2174	3069	2615	2111	2251	2055	2391	1350	2460	2769	1493	2001	2383	2679	9.34642	9.20985	12.329	12.7134	10.5701	7.7751	9.1081	10.614	12.8541	7.14422	9.4418	9.83693	11.8658	5.87301	9.18982	13.4449	6.78744	9.44736	9.54121	10.1696	0.447199	-0.0941817
ENSG00000115138	POMC	245	310	398	470	323	347	371	407	208	535	381	296	619	391	222	197	330	314	263	234	4.35482	5.55634	6.89736	9.0118	5.38919	6.95223	6.52183	6.46499	3.8654	8.19559	6.46899	5.97618	13.1458	7.75098	5.15553	3.74527	7.37427	5.45338	5.17007	4.14667	0.88503	-0.0317199
ENSG00000154845	PPP4R1	1718	1645	1750	1584	1717	1633	1842	2073	1926	2054	1711	1534	1433	1719	1721	1927	1211	1710	1873	2087	11.5203	11.0336	10.7319	10.6091	10.7476	11.0235	11.2572	11.2387	14.5269	10.7891	10.138	10.4612	10.379	11.4735	10.6895	13.9614	9.77485	11.3456	12.8818	12.3909	0.625133	-0.0208285
ENSG00000166289	PLEKHF1	950	773	1193	1078	703	642	850	1127	1007	1489	867	807	910	894	893	813	707	786	1023	937	12.0794	10.0878	13.3666	13.4289	8.32042	8.21444	9.70141	11.8227	13.3552	14.7032	9.88383	10.3723	12.3824	11.5911	10.4899	11.0669	10.2929	9.78983	13.5846	10.5913	0.374086	-0.0836716
ENSG00000157450	RNF111	846	768	947	687	808	707	873	877	1000	806	659	708	713	786	787	956	510	762	791	998	3.77861	3.60563	3.80138	3.24524	3.43903	3.34377	3.54699	3.22326	5.0006	2.98528	2.62264	3.40436	3.62758	3.88083	3.21673	4.48111	2.60873	3.39735	3.71257	4.22624	0.41459	-0.0617609
ENSG00000108984	MAP2K6	435	567	511	434	441	558	464	510	567	650	288	412	326	541	620	341	366	385	633	375	0.975567	1.18301	0.919901	0.937655	0.958483	1.07964	1.10618	0.806817	1.21842	0.984969	0.504878	0.838991	0.668154	1.08418	1.10963	0.689664	0.832027	0.801729	1.27029	0.643192	0.202533	-0.183718
ENSG00000182667	NTM	707	571	200	238	281	263	318	230	394	620	225	494	184	1139	246	764	158	566	1034	639	6.34603	5.28163	1.72472	2.60551	2.42043	2.4309	2.52062	1.81029	3.97711	4.1582	2.04113	5.32064	1.90855	10.1729	2.00834	7.52649	1.64162	4.89487	9.84543	5.10242	0.0883405	0.532872
ENSG00000165959	CLMN	747	695	1324	1012	895	978	792	1052	1033	774	803	790	901	595	658	859	567	770	767	804	1.61132	1.53193	2.72503	2.19243	1.89269	2.25325	1.76341	1.92016	2.48355	1.34234	1.52899	1.8846	2.2905	1.29701	1.33517	2.07322	1.41964	1.662	1.76292	1.51305	0.0562972	-0.243235
ENSG00000127990	SGCE	1964	1932	1270	1286	1453	1441	1679	1716	1895	3584	1151	1616	980	2834	1120	1704	1403	1594	1734	2026	29.8199	31.8872	16.9185	19.5963	21.221	21.0941	23.1979	21.4473	30.6504	43.5553	15.3176	25.2857	15.767	42.9703	15.4636	27.7376	24.2696	23.4991	26.9965	27.5968	0.614809	-0.0798572
ENSG00000127993	RBM48	604	681	730	737	608	612	657	876	710	666	617	757	452	507	554	455	483	673	572	605	5.03999	5.23297	5.45557	5.90518	5.37135	4.90881	6.21426	6.41179	6.53523	4.63417	4.45813	6.09998	3.88075	4.54604	4.63965	3.65482	4.40017	4.94705	5.58411	5.02025	0.0506002	-0.205239
ENSG00000127995	CASD1	1779	1999	2396	1741	2424	2376	2100	2486	2384	2553	1837	2272	2201	2121	2634	1975	1601	1800	2364	2189	11.4491	12.9939	13.6697	11.0574	14.662	15.6397	12.1462	12.9977	16.0555	12.8502	10.5635	15.068	15.3736	13.8336	15.6846	13.591	11.7807	11.3069	15.745	12.7635	0.922869	-0.00945352
ENSG00000162076	FLYWCH2	1072	981	936	929	865	809	1008	1417	960	1603	1217	951	761	1017	967	903	711	1320	1038	1185	26.3404	24.6519	20.4025	22.6622	20.1733	20.5595	22.2268	28.5288	24.7387	30.766	27.0762	24.1383	20.5367	25.3457	21.9741	23.7953	20.2383	31.6971	26.3898	26.3586	0.88288	0.0126569
ENSG00000166750	SLFN5	1094	1025	1414	1395	1149	1168	811	1087	1443	1435	859	1121	764	1069	1237	1278	530	1807	1110	1394	2.62228	2.48331	3.00232	3.33193	2.58794	2.87839	1.74862	2.11428	3.61971	2.70031	1.83788	2.7686	1.98675	2.61736	2.75534	3.27316	1.45089	4.23104	2.75441	3.0234	0.637291	-0.064582
ENSG00000162073	PAQR4	492	532	472	420	495	614	635	999	560	503	513	441	606	567	387	648	403	506	470	562	4.53188	4.979	3.86986	3.8898	4.31372	5.82059	5.34388	7.5826	5.39065	3.76413	4.23367	4.36815	6.07046	5.25921	3.32629	6.46781	4.25935	4.61108	4.47951	4.73681	0.504861	-0.0918401
ENSG00000157985	AGAP1	830	748	1068	914	833	760	889	1148	1146	1044	766	798	734	870	727	1241	470	753	1071	1062	2.1854	2.25967	2.33389	2.2288	1.97306	2.07807	2.29032	2.51761	3.19994	2.17057	1.61104	2.16713	1.94443	2.51357	1.73419	3.30641	1.55963	2.06809	2.93599	2.42863	0.333006	-0.0891412
ENSG00000280789	PAGR1	1123	831	1076	1093	865	865	1109	692	1029	1593	1259	1321	911	1058	1161	1140	746	1162	1366	1360	16.7309	12.5126	14.2137	16.0703	12.1126	13.1896	14.8543	8.37734	16.0413	18.569	16.7675	20.2942	14.7377	15.9847	16.0085	18.1681	12.7204	16.9065	21.062	18.3628	0.0226342	0.228452
ENSG00000165487	MICU2	3715	4032	4929	4308	5059	4882	4931	5767	4822	5748	5179	4601	5231	4031	5347	3984	3802	4114	4007	4210	49.1007	53.8218	57.7347	56.1806	62.8221	65.9881	58.5724	61.8954	66.6726	59.4242	61.1675	62.6699	75.0194	53.9948	65.3782	56.3057	57.464	53.0961	54.799	50.4022	0.814579	-0.0252265
ENSG00000178234	GALNT11	2162	1717	1570	1408	1706	1471	2026	2110	1948	3256	1577	1741	1460	2474	1645	2123	1371	2472	2886	2578	20.2735	16.1468	13.0241	13.0417	14.9494	14.1094	16.9972	16.1245	19.2968	23.8411	13.1528	16.768	14.9475	23.8037	14.2583	21.4509	14.6651	22.7755	28.083	22.0776	0.18635	0.145079
ENSG00000154188	ANGPT1	638	621	397	365	517	502	516	509	458	695	363	797	542	794	367	586	360	688	695	828	3.72566	3.66424	2.05296	2.10053	2.83622	2.99638	2.72789	2.42308	2.81036	3.1913	1.89346	4.79454	3.43467	4.69954	1.98086	3.65563	2.40407	3.92526	4.20264	4.38386	0.0854327	0.256046
ENSG00000158604	TMED4	2744	2635	2924	2686	2981	2848	3076	3422	2796	3515	3383	3109	2494	2825	3501	2895	2089	3039	3166	3480	32.5217	31.7167	30.7045	31.1998	33.023	34.2951	32.5744	32.398	34.4717	32.5699	35.5234	38.1342	32.0851	33.9717	38.4958	36.5725	27.9471	35.3522	38.45	37.8043	0.193323	0.0820935
ENSG00000009724	MASP2	111	81	70	61	44	37	51	109	117	66	48	97	94	67	66	86	62	105	68	63	1.15272	0.849652	0.640987	0.620043	0.424004	0.391779	0.473208	0.920635	1.26783	0.536106	0.443628	1.03303	1.05013	0.70136	0.632483	0.94833	0.733886	1.06509	0.726698	0.593176	0.583422	0.116274
ENSG00000101161	PRPF6	2655	2243	2632	2495	2055	1803	2189	2996	2411	3267	2575	2378	2062	2169	2357	2725	1401	2143	2754	2767	22.1292	18.8817	19.4442	20.5153	16.09	15.3692	16.4016	20.2849	21.0292	21.3012	19.1812	20.4306	18.6521	18.3226	18.1793	24.2914	13.3571	17.4478	23.7536	20.8952	0.806234	-0.0151645
ENSG00000101160	CTSZ	4087	3432	3006	2880	3402	2786	3617	3851	3505	6049	2913	3059	2439	4865	3079	4001	2097	3735	3178	4249	69.371	58.8358	45.2106	48.2278	54.2456	48.3579	55.1724	53.0833	62.2442	80.3042	44.1828	53.4982	44.9237	83.6889	48.3434	72.622	40.693	61.9137	55.8135	65.3211	0.600484	-0.051673
ENSG00000170027	YWHAG	7778	8303	13003	9762	9739	9315	9473	12163	10495	10746	10436	8104	10469	7875	10844	11064	6273	8793	9310	11484	52.6323	56.7599	77.9847	65.1761	61.9238	64.4616	57.6153	66.8469	74.305	56.8783	63.1067	56.5168	76.8805	54.0092	67.8988	80.0561	48.5446	58.1099	65.1895	70.3945	0.800569	-0.0238852
ENSG00000171777	RASGRP4	139	58	65	63	71	33	83	59	66	178	32	113	32	125	52	55	39	81	62	61	1.08564	0.440229	0.441813	0.469061	0.506139	0.255505	0.579735	0.361737	0.535608	1.09515	0.216903	0.897865	0.255432	0.962975	0.373498	0.453254	0.337624	0.614016	0.501335	0.427997	0.411532	-0.223237
ENSG00000175213	ZNF408	211	236	269	294	183	209	185	307	258	356	247	248	208	261	282	270	123	262	225	296	2.19152	2.46891	2.47237	3.00787	1.78457	2.21189	1.72146	2.58576	2.80196	2.88564	2.28632	2.64597	2.34347	2.74577	2.70873	2.99105	1.45738	2.65843	2.41932	2.78559	0.857837	0.0178996
ENSG00000175215	CTDSP2	5818	5246	6172	5219	5529	5297	5324	6802	5813	6719	4645	5243	5088	6262	5019	6638	3293	5594	6210	6826	30.9274	28.1666	29.0836	27.4395	27.6243	28.7549	25.4205	29.4068	32.2874	27.8957	22.0275	28.7454	29.2593	33.7584	24.6348	37.7157	19.9882	28.9516	34.1499	32.8518	0.67841	-0.0238014
ENSG00000175216	CKAP5	1855	1645	2586	1875	1765	1615	1954	2552	2457	2105	1916	1882	2030	1628	1919	2642	980	1723	1975	2725	6.6533	5.99844	8.21919	6.7133	6.00079	5.96664	6.27351	7.77972	9.1955	5.90451	6.10673	6.95711	7.89062	5.90308	6.35404	10.1378	4.07768	6.13999	7.33761	8.83447	0.865044	-0.0172575
ENSG00000179542	SLITRK4	304	360	379	366	275	277	83	144	408	755	399	306	277	341	598	636	237	263	398	761	0.905195	1.07757	0.995432	1.26665	0.764893	0.871756	0.219349	0.346696	1.41222	1.75266	1.10117	0.964711	0.904935	1.0246	1.64215	2.16203	0.803796	0.762107	1.23828	2.33766	0.120351	0.398371
ENSG00000170791	CHCHD7	1043	1071	899	772	851	835	1020	1130	1013	1506	1073	1043	757	1073	987	769	900	1016	1012	1188	18.3464	19.0775	13.2989	12.888	14.135	14.8923	15.8836	15.5163	18.0917	20.1657	16.5311	18.6165	14.0123	19.4775	15.2557	14.2887	18.4731	17.0355	18.5513	18.4709	0.61596	0.0441165
ENSG00000196693	ZNF33B	389	414	364	399	321	312	297	409	398	512	350	486	444	572	382	583	255	390	486	475	2.46762	2.56586	1.79186	2.49651	1.72656	1.65013	1.34142	2.03165	2.33572	1.93735	1.57329	3.09728	2.8908	3.67008	2.10516	3.62189	1.95904	2.08174	3.11832	2.36722	0.00470302	0.278783
ENSG00000124313	IQSEC2	562	523	619	544	476	373	639	727	535	686	487	411	403	490	335	514	439	461	476	602	5.96439	7.69632	7.66763	8.47828	6.57464	6.17053	9.53184	7.80879	7.48654	8.3284	7.29862	6.61046	6.93527	7.55867	4.97095	6.23388	8.47058	6.16316	5.75678	7.61139	0.0179857	-0.216743
ENSG00000197124	ZNF682	96	90	125	73	98	122	87	139	145	184	118	105	84	140	120	123	117	117	99	96	1.02394	1.28002	1.00719	0.736718	0.87182	1.19825	1.15273	1.07534	1.43217	1.43237	0.856997	1.35399	0.963379	1.09755	0.939681	1.31577	1.11023	1.23019	0.971341	0.770322	0.698479	0.0553027
ENSG00000197122	SRC	536	456	280	294	324	261	396	387	424	741	354	428	285	458	376	447	221	519	584	541	3.03682	2.52359	1.46495	1.89068	1.78115	1.7248	2.08611	1.86273	2.45634	3.32962	2.08344	2.61607	1.69139	2.62205	1.90429	3.06021	1.65969	2.87561	3.36049	2.8567	0.434659	0.110403
ENSG00000197121	PGAP1	621	743	874	715	723	701	733	947	1124	905	790	864	769	743	865	1031	548	745	774	840	1.41487	1.71332	1.77784	1.60673	1.55102	1.63589	1.50351	1.75446	2.68463	1.61529	1.61173	2.03183	1.90322	1.73343	1.82583	2.51697	1.42947	1.6596	1.82823	1.75142	0.548787	0.0519948
ENSG00000161835	GRASP	528	450	612	704	554	611	616	809	1043	1357	753	522	551	453	756	739	448	512	799	674	7.02506	5.96502	7.21143	9.24319	6.93753	8.27427	7.27123	8.61823	14.5413	14.052	8.97372	7.18375	7.95117	6.33027	9.33591	10.4456	6.88016	6.65001	11.0892	8.13112	0.364795	-0.128323
ENSG00000197128	ZNF772	881	862	1174	928	1489	1143	889	1364	1182	1080	1269	1104	874	668	1305	924	689	875	834	1178	4.53637	4.40484	5.33231	4.90662	7.06779	5.70904	4.11508	5.31575	6.42489	4.39975	5.33222	5.55051	4.85528	3.35856	5.8884	5.23342	3.87761	4.41418	4.51392	5.17851	0.404125	-0.115844
ENSG00000006125	AP2B1	4075	3406	4601	3840	4102	3583	3772	4984	4215	4575	3983	3756	3465	4041	3593	4903	2357	3804	4272	4786	18.9141	15.9725	22.1311	20.3507	20.1946	19.3637	18.7416	20.0387	20.7505	18.1145	18.4698	18.1489	21.1741	19.2868	15.4868	24.8521	14.242	20.1433	21.094	22.6081	0.699576	-0.0221016
ENSG00000121898	CPXM2	6765	4982	3195	2846	3565	3360	4372	5138	5613	8612	2930	4695	2723	8922	3417	8041	2342	7798	6705	8957	48.3387	35.9799	20.2311	20.0888	23.9243	24.5487	28.1336	29.8541	41.9808	48.1191	18.6951	34.5649	21.138	64.6018	22.5871	61.5272	19.1361	54.4214	49.5896	57.9589	0.197707	0.271906
ENSG00000121897	LIAS	698	742	873	777	809	687	806	987	708	909	765	819	865	737	662	696	628	710	709	847	4.89614	5.61107	6.90895	7.31447	5.5399	7.51577	6.32342	5.24749	6.08462	6.40751	5.93154	6.83722	8.03533	6.85258	6.82538	6.25607	7.02894	6.06086	6.81773	7.26231	0.781017	-0.0236988
ENSG00000121892	PDS5A	1750	1837	2072	2103	1962	1973	1724	1958	2136	2400	1567	1807	1753	2097	1781	2263	1190	1927	1947	2286	6.23992	6.7298	6.64504	7.43459	6.60639	7.32528	5.73379	5.77084	8.0379	6.75071	5.12369	6.70848	6.84537	7.84429	5.94325	8.69011	4.9433	6.83533	7.28516	7.52074	0.535325	-0.0420581
ENSG00000198695	MT-ND6	224051	204643	303334	224798	199277	237406	319307	354597	134015	223422	417542	204411	181225	159467	409997	261337	193379	231941	131881	247122	10830.4	9992.53	12994.6	10721.2	9050.64	11735.8	13872.8	13920.6	6777.64	8447.26	18036.2	10182.9	9506.15	7812.89	18336.9	13507.9	10690.7	10949.3	6596.16	10820.2	0.685127	0.0824347
ENSG00000198691	ABCA4	109	192	208	163	233	289	269	261	101	111	72	286	107	162	72	155	40	115	106	286	0.376728	0.672138	0.638276	0.557312	0.75628	1.02335	1.62901	0.735266	0.716296	0.301387	0.436219	1.934	0.404562	0.567682	0.231024	0.573291	0.303847	0.389577	0.378806	0.898569	0.0977725	-0.489408
ENSG00000198690	FAN1	796	847	1190	1089	726	829	1025	1226	1102	798	730	708	848	735	912	1140	605	872	885	857	4.4441	4.69477	5.63908	5.75602	3.69401	4.64334	5.04559	5.45054	6.20746	3.611	3.62105	4.13238	5.01883	4.04594	4.55663	6.52415	3.92177	5.00178	5.00004	4.2558	0.18771	-0.151111
ENSG00000198692	EIF1AY	5336	5532	4341	4265	3674	3841	5167	4984	0	0	6173	5772	0	0	0	0	0	0	3753	0	106.869	106.172	73.3806	79.9	66.5239	77.3848	88.7704	78.0963	0	0	106.166	114.385	0	0	0	0	0	0	73.856	0	0.547373	-1.25922
NewGene_10249	NewGene_10249	152	86	65	61	60	43	83	99	94	146	56	102	39	136	83	110	68	85	110	110	1.47312	0.845324	0.557626	0.578823	0.544739	0.421353	0.72652	0.782953	0.955994	1.11072	0.481651	1.0211	0.407498	1.33569	0.744734	1.14205	0.752582	0.805515	1.10215	0.967075	0.627128	0.0994415
NewGene_10240	NewGene_10240	24	24	44	21	44	53	67	53	63	39	38	60	55	8	34	8	52	43	30	28	0.324908	0.323496	0.587083	0.299653	0.55171	0.779151	0.812128	0.648517	0.996206	0.44593	0.457541	0.915916	0.902003	0.107593	0.475227	0.101093	0.868557	0.622328	0.45354	0.455494	0.682852	-0.146533
ENSG00000176749	CDK5R1	187	254	313	213	241	217	268	381	289	239	362	222	237	144	341	320	151	173	285	278	1.09372	1.50111	1.62531	1.23278	1.32359	1.31542	1.41003	1.81462	1.7694	1.09395	1.89335	1.34083	1.50758	0.85339	1.84828	2.04098	1.01042	0.985815	1.72677	1.48044	0.926808	0.0148089
NewGene_1267	NewGene_1267	90	86	20	26	40	30	69	77	6	4	61	88	39	48	43	39	35	35	205	49	0.875198	0.750295	0.124959	0.206405	0.360065	0.266928	0.470346	0.488618	0.04232	0.019816	0.513901	0.839548	0.438237	0.429862	0.281196	0.374543	0.310247	0.240606	1.9243	0.405866	0.254749	0.528744
NewGene_1263	NewGene_1263	47	47	499	559	141	190	301	204	58	242	155	126	436	184	196	50	425	13	76	50	1.44758	1.50063	14.0887	17.4584	4.08195	6.12947	8.40761	5.15121	1.68771	5.60338	4.27325	4.01112	14.9993	5.92165	5.78226	1.66699	15.6286	0.325499	2.4262	1.24242	0.736245	-0.19919
NewGene_1260	NewGene_1260	28	44	35	36	52	38	39	59	37	49	28	37	20	27	18	14	34	40	20	52	0.5735	0.917309	0.64098	0.731935	1.01389	0.802939	0.725913	0.991199	0.800122	0.7883	0.508368	0.784819	0.452084	0.555359	0.331944	0.30221	0.810244	0.812076	0.432221	0.981491	0.0467198	-0.449918
ENSG00000163382	NAXE	1907	1875	1660	1808	1755	1540	2254	2216	1445	2642	1833	1508	1445	1953	1579	1419	1464	1869	1410	1651	43.3231	43.0452	33.3316	40.7378	37.3886	35.6807	45.8975	40.6913	34.3286	46.8222	37.1019	35.1934	35.4815	44.7995	33.0683	34.4963	37.8553	41.642	33.2317	34.0302	0.12568	-0.154326
ENSG00000176293	ZNF135	414	494	717	556	366	539	506	633	653	672	681	478	398	508	708	582	526	430	749	655	3.49039	4.25849	5.45884	4.66077	2.88106	4.69788	3.91189	4.42373	6.4061	4.44024	5.25828	4.21122	3.60571	4.30553	5.70772	5.4179	5.13476	4.14974	6.81508	4.96467	0.327405	0.123841
ENSG00000092621	PHGDH	1770	1395	642	784	712	620	1001	776	671	1662	613	1024	497	1650	1037	1283	626	1224	1392	1997	21.8572	18.7549	6.91286	9.31698	8.0788	7.84436	11.3152	7.62632	8.48975	16.6488	6.57086	12.9332	6.52887	20.6725	11.6126	18.0743	8.66331	14.9444	17.4435	22.0062	0.323192	0.216569
ENSG00000136383	ALPK3	2771	2890	5249	4118	3110	2980	3064	4771	4663	3925	3533	3653	3244	2264	3818	4609	2504	2650	3766	4170	6.43987	6.78503	10.8134	9.44486	6.79101	7.08394	6.3998	9.00593	11.3406	7.13534	7.33835	8.74912	8.18295	5.33356	8.21016	11.4563	6.65461	6.01557	9.056	8.77954	0.625365	-0.061182
ENSG00000136381	IREB2	1655	1653	2370	1682	1711	1686	1921	2305	2170	2220	1795	1949	1907	1498	1775	1998	1393	1755	1808	2302	6.66367	6.71645	8.41334	6.65313	6.41984	6.88642	6.89357	7.5935	9.16055	6.94161	6.41964	8.03992	8.31309	6.06686	6.5782	8.54228	6.36943	6.84327	7.47829	8.33109	0.822981	-0.0158929
ENSG00000132801	ZSWIM3	153	110	116	84	104	101	159	111	136	211	91	118	104	119	117	138	95	101	114	176	1.39763	1.01573	0.933961	0.755227	0.89004	0.943517	1.3003	0.824807	1.29377	1.50652	0.741214	1.11235	1.02787	1.10067	0.985616	1.34849	0.988122	0.898404	1.07871	1.45853	0.678287	-0.0518644
ENSG00000141576	RNF157	1313	1297	2342	1700	1317	1437	1411	1894	1348	1225	1417	1282	1602	1052	1247	1474	1168	1155	1420	1619	6.96667	6.97003	10.9595	8.84148	6.76448	7.75839	6.80671	8.16406	7.47323	5.05739	6.78754	7.08849	9.10615	5.64187	6.29669	8.55826	6.91557	5.9037	7.80956	7.89571	0.379269	-0.115532
ENSG00000177169	ULK1	1913	1594	2405	1941	1703	1580	2013	2727	1968	2145	2130	2262	1718	1657	1870	2446	1174	1899	2221	2660	9.1408	7.69098	10.1858	9.14826	7.64618	7.71776	8.64609	10.5823	9.83936	8.01469	9.09618	11.1367	8.90725	8.02506	8.26622	12.4968	6.41602	8.86105	10.9818	11.5132	0.45178	0.0622924
ENSG00000141574	SECTM1	308	209	152	153	206	170	151	150	318	606	130	156	111	259	98	251	133	161	274	164	3.51295	2.38781	1.52147	1.70712	2.20542	2.09606	1.53979	1.39584	3.92193	5.37587	1.31813	1.82247	1.3636	2.97203	1.03373	3.03941	1.7188	1.78059	3.44275	1.67756	0.102285	-0.371803
ENSG00000141570	CBX8	59	57	65	69	44	32	84	76	76	103	82	50	63	64	34	75	32	56	73	89	0.391569	0.382782	0.382497	0.453529	0.273014	0.218657	0.504285	0.408255	0.531261	0.536023	0.488696	0.340664	0.455228	0.433741	0.208109	0.532702	0.240042	0.360132	0.499034	0.538809	0.84883	-0.0323821
ENSG00000172530	BANP	474	376	446	345	332	309	295	423	339	446	303	341	289	358	295	383	180	360	419	549	5.57974	4.42634	4.78383	3.99956	3.6341	3.65017	3.22021	4.12518	4.50834	4.14435	3.14369	4.13654	3.69367	4.3009	3.17976	4.67479	2.86943	3.96601	5.06534	6.10353	0.447069	-0.0760022
ENSG00000172531	PPP1CA	2386	2349	2215	2239	1895	2099	2442	2570	2154	3125	2712	2220	1891	2473	2155	2292	1660	2398	2237	2921	42.5265	43.42	35.2522	40.5	32.0571	37.3169	38.1934	37.6683	39.3044	44.6572	42.4489	40.3504	36.1655	44.1025	35.2513	44.2446	33.7484	41.9011	41.1097	46.9251	0.522583	0.0363844
ENSG00000172534	HCFC1	1279	1024	1512	1290	1452	1214	1137	1833	1505	1414	1303	1203	1031	901	1328	1804	749	1296	1464	1624	3.98186	2.96022	3.97434	3.80716	4.60411	4.86312	2.92266	4.26028	4.50604	3.16756	3.32988	5.79199	4.28658	2.70239	3.78296	5.62419	2.45867	3.63262	4.81849	4.21182	0.611391	-0.0523645
ENSG00000173660	UQCRH	5268	6254	5171	5684	4464	4681	6932	6187	4299	9225	6146	4697	5005	6323	5532	3692	5801	6410	4486	4902	213.227	256.461	185.945	227.551	169.576	194.258	253.388	202.917	182.343	293.348	221.857	195.84	219.724	260.652	208.548	160.492	268.629	255.047	188.651	180.279	0.87926	-0.021209
ENSG00000147804	SLC39A4	107	75	87	58	70	94	70	69	70	110	70	79	54	111	47	78	73	52	87	94	1.17193	0.835796	0.84858	0.62577	0.716398	1.05166	0.692529	0.611997	0.799431	0.947167	0.690708	0.894325	0.641575	1.23922	0.4739	0.914699	0.911534	0.556171	0.993258	0.933894	0.758733	-0.0504348
ENSG00000162910	MRPL55	709	705	584	681	638	563	748	738	538	1146	717	714	549	770	740	551	531	685	730	893	24.0614	24.5265	16.6191	20.9277	20.968	18.0625	22.4291	19.1764	18.5356	30.9436	21.8765	21.1788	19.796	25.3959	22.2532	20.6189	20.4282	22.9281	24.1623	26.697	0.632539	0.0448154
ENSG00000122203	KIAA1191	2746	2927	3030	2617	2825	2737	3039	3346	2822	3676	3139	2831	2562	3358	2644	2819	2208	3274	2939	3366	24.0718	25.6601	24.1779	22.807	23.0032	24.1206	24.0479	24.3731	25.9986	25.0105	24.3514	25.3246	24.2318	29.3758	21.0496	28.3971	21.7014	27.8517	26.551	26.6739	0.457989	0.0394674
ENSG00000113300	CNOT6	756	827	882	762	845	794	757	867	931	922	776	902	716	881	758	883	576	839	769	1028	3.09172	3.43061	3.21118	3.04635	3.26351	3.32929	2.79176	2.89582	4.00565	2.96017	2.79761	3.80286	3.1645	3.66567	2.87961	3.89015	2.69152	3.3668	3.26428	3.79126	0.714857	0.0219537
ENSG00000073282	TP63	229	339	318	240	275	319	163	313	402	404	294	204	283	213	369	363	78	313	310	609	2.16889	2.47966	2.01092	1.80009	1.93799	2.35736	1.22734	1.66106	2.72257	1.96396	1.79702	1.95584	2.04696	1.5191	2.2665	2.63334	0.863629	2.40804	2.4176	4.19783	0.836073	0.041453
ENSG00000096654	ZNF184	209	235	238	222	207	242	217	267	286	357	212	259	267	298	254	281	170	273	289	347	1.70485	1.93509	1.72124	1.78747	1.58246	2.02321	1.59346	1.7743	2.44739	2.28265	1.55014	2.17841	2.36714	2.47054	1.91881	2.45194	1.59038	2.17897	2.44368	2.5713	0.0295903	0.166076
ENSG00000089737	DDX24	3480	3164	4309	3397	3700	3338	3715	4776	3976	4000	3383	3817	3454	3076	3742	4150	2441	3542	3918	4475	20.9343	15.0337	17.6357	15.7137	24.206	16.0686	15.3884	17.8475	21.0926	17.9907	14.509	20.5929	18.9853	17.2373	16.1754	26.546	13.1029	16.892	18.7103	18.687	0.89158	-0.00874617
ENSG00000070882	OSBPL3	1711	2102	808	698	4242	4155	3425	4461	2772	1840	3301	1858	2604	689	3566	1005	1386	2652	1191	1092	6.61023	8.14137	2.75721	2.87073	15.1557	16.054	11.7507	13.7052	11.2372	5.45936	11.1244	7.22635	10.6833	2.71727	12.4422	4.1093	6.44865	10.0644	4.67682	3.75208	0.351491	-0.360217
NewGene_7374	NewGene_7374	74	80	226	126	76	80	38	155	100	77	68	77	110	21	117	88	80	94	69	114	0.742668	0.810275	2.04428	1.24162	0.713917	0.817694	0.350564	1.27714	1.03885	0.583575	0.61493	0.795991	1.19591	0.208831	1.09219	0.958867	0.924043	0.918479	0.705353	1.05005	0.469419	-0.208052
NewGene_7373	NewGene_7373	188	160	132	129	96	69	156	141	145	269	109	85	111	164	125	233	56	153	147	134	3.6035	3.10469	2.23363	2.43943	1.71572	1.3404	2.67683	2.19052	2.90584	4.03482	1.8543	1.68074	2.30443	3.18761	2.20619	4.76756	1.21574	2.86325	2.91063	2.31947	0.593716	-0.0984971
NewGene_7372	NewGene_7372	402	403	389	434	407	353	311	353	399	513	636	496	390	375	394	331	363	490	668	365	1.81777	2.28236	2.91203	1.81119	1.68701	1.57801	1.48718	1.23651	1.90428	2.1057	2.50713	2.20397	2.07742	1.81153	1.65904	1.95978	1.76174	2.17237	3.18672	1.41979	0.0544	0.262983
ENSG00000224578	HNRNPA1P48	285	198	176	179	264	190	230	162	177	288	161	224	185	309	160	153	186	246	288	248	4.59579	3.2133	2.50912	2.84107	3.99268	3.12254	3.33305	2.11337	2.98308	3.63534	2.31832	3.71267	3.23716	5.05519	2.37564	2.62473	3.42651	3.86795	4.79635	3.6156	0.632351	0.0745044
ENSG00000137522	RNF121	676	628	927	669	674	644	704	793	656	888	693	716	673	719	656	707	583	758	734	813	6.90785	6.24375	8.50303	7.17899	6.90217	6.47553	6.48727	6.44472	6.90841	7.03274	5.99395	7.43547	7.39295	7.08788	6.09181	7.68379	6.96369	7.97953	8.11095	7.59882	0.588042	0.0348159
ENSG00000145982	FARS2	477	496	492	378	476	417	346	534	409	586	557	441	440	464	480	425	337	486	441	614	7.24053	7.55796	6.62726	5.67057	6.8366	6.32719	4.83765	6.37895	6.38208	6.93604	7.62549	6.9032	7.347	7.1537	6.72913	6.86899	5.92647	7.12028	6.95804	8.42227	0.264993	0.0924876
ENSG00000110651	CD81	11085	9337	8295	7604	9291	9259	8959	10088	9504	16681	9221	9709	6956	12734	8849	10151	5749	10053	11538	14422	187.026	159.327	125.173	125.845	146.492	158.816	135.7	138.026	167.011	219.75	140.049	168.773	126.908	217.112	137.925	182.424	111.249	165.024	201.18	221.908	0.596285	0.0504275
ENSG00000117153	KLHL12	1160	1020	1208	1057	1196	1051	1195	1553	1172	1135	1085	1124	1101	962	1028	1062	794	934	1050	1193	8.76797	7.78634	8.08347	7.89103	8.48972	8.11635	8.10811	9.52765	9.26475	6.73072	7.31882	8.74818	9.02925	7.37274	7.2087	8.58172	6.86578	6.89708	8.20565	8.18208	0.144304	-0.114556
ENSG00000117152	RGS4	6024	5894	7366	4658	5276	4135	8395	8983	8248	5996	7991	4343	3946	6585	7319	8607	4371	6481	4258	5033	46.7911	46.7652	52.1688	36.5003	38.6004	33.0049	58.0823	57.9737	67.8398	36.898	56.6935	34.3512	33.9719	52.0964	53.408	70.7087	38.4779	50.5772	35.3732	36.234	0.686105	-0.0623983
ENSG00000117151	CTBS	420	447	545	388	450	448	394	419	623	758	358	361	367	545	340	380	397	502	467	576	2.07351	1.80028	2.08074	1.69116	1.75042	1.83369	1.58351	1.35481	2.9316	2.43167	1.27622	1.56592	1.81935	2.30131	1.21278	1.63856	2.06047	2.29485	2.11326	2.15518	0.359021	-0.103139
ENSG00000117155	SSX2IP	483	462	493	416	460	463	464	522	636	845	602	521	460	480	400	601	335	524	596	720	2.19328	2.41324	2.10456	1.84979	1.9702	2.09348	1.95926	1.85531	2.88651	2.87165	2.33877	2.33071	2.1643	2.11447	1.65341	2.87905	1.70745	2.21992	3.26138	2.83548	0.386149	0.0714066
ENSG00000171984	SHLD1	184	183	271	201	194	201	211	244	184	270	182	187	167	218	176	102	178	193	171	197	4.14232	4.30403	5.3801	4.41247	4.24835	4.71282	4.30496	4.46752	4.49309	4.90475	3.73122	4.35367	4.17962	5.31719	3.81296	3.63879	4.72507	4.23537	4.02991	4.05722	0.150127	-0.184245
ENSG00000171988	JMJD1C	1601	1616	1775	1536	1434	1538	1393	1511	2072	1962	1361	1390	1359	1780	1644	2330	1064	1572	1709	2088	5.2462	5.51565	5.21674	4.94933	4.48519	5.25242	3.96256	3.65994	6.75943	4.90304	4.03089	4.77516	4.37404	5.93999	5.04647	7.57979	4.29206	4.59621	6.04509	6.06473	0.617246	0.0416462
ENSG00000103319	EEF2K	1391	1157	1400	1107	981	1026	1085	1680	1433	1475	1239	1330	1129	960	1028	1271	739	1067	1583	1426	4.81423	4.04158	4.28745	3.76023	3.16954	3.60578	3.374	4.71968	5.19471	4.00452	3.82637	4.72527	4.21565	3.35088	3.27177	4.67797	2.89968	3.57927	5.64617	4.47957	0.608138	-0.0434164
NewGene_2251	NewGene_2251	96	104	85	125	157	147	95	152	120	128	132	125	91	80	101	86	78	87	144	135	0.928966	1.01	0.704526	1.22514	1.44085	1.49458	0.919519	1.19615	1.27443	1.00487	1.29589	1.20823	0.947514	0.76547	0.858042	0.855825	0.926198	0.836291	1.53625	1.11842	0.380183	-0.138105
ENSG00000083812	ZNF324	201	37	140	207	146	141	176	235	174	188	156	172	144	181	240	254	140	164	168	249	1.40057	0.93962	1.04571	1.41748	0.973026	0.647182	1.09481	1.15475	0.905191	1.04982	0.817195	1.21438	1.02506	0.822583	1.10633	1.90445	0.71722	0.718277	1.03381	1.01202	0.197994	0.253742
ENSG00000083814	ZNF671	245	271	376	317	344	340	309	399	330	338	351	355	324	226	296	360	238	312	296	439	2.54521	2.87003	3.59795	3.22279	3.3819	3.61055	2.8485	3.43855	3.42389	2.63236	3.30383	3.69691	3.7762	2.3874	2.75858	4.12782	2.82477	3.20411	3.27193	4.00242	0.788508	0.0286741
ENSG00000083817	ZNF416	204	149	144	140	205	166	214	209	174	228	235	195	195	173	163	166	147	179	223	176	2.01894	1.4898	1.25705	1.36014	1.90604	1.67268	1.90207	1.67516	1.79667	1.76055	2.07267	1.98253	2.0897	1.73337	1.48901	1.75454	1.66033	1.7291	2.28496	1.57232	0.412061	0.0945088
ENSG00000102048	ASB9	54	55	46	55	76	61	43	50	63	61	38	63	34	53	63	39	48	52	54	67	0.822785	0.843319	0.563998	0.773275	1.01042	0.959295	0.568511	0.619389	0.978962	0.720404	0.483338	1.00581	0.556365	0.791504	0.874412	0.618624	0.775935	0.70705	0.82552	0.91799	0.619616	-0.0823147
ENSG00000269881	AC004754.1	72	64	78	51	113	48	50	172	211	163	122	193	82	84	169	112	26	167	145	129	0.814208	0.727831	0.77686	0.559081	1.1986	0.549356	0.506902	1.57702	2.49657	1.43965	1.23301	2.24518	0.99956	0.95522	1.76775	1.34825	0.335416	1.84476	1.68862	1.31788	0.209501	0.356157
ENSG00000173926	2024-03-03	224	185	165	167	177	167	216	191	129	213	111	136	144	325	181	187	86	113	213	243	1.37174	1.14637	0.998294	1.00699	1.00834	1.03311	1.19014	0.951781	0.83951	1.01508	0.59429	0.861224	0.967714	2.00847	1.01918	1.23205	0.600528	0.675065	1.34052	1.33721	0.821592	-0.0393819
ENSG00000175155	YPEL2	1126	945	934	1012	907	930	789	946	1158	1391	765	842	850	1094	1010	1127	588	995	1058	1500	5.47311	4.64178	4.02527	4.85238	4.14436	4.62392	3.44751	3.73395	5.89118	5.29137	3.32359	4.22058	4.4816	5.39181	4.54266	5.8596	3.27062	4.72216	5.32438	6.646	0.91937	0.00880289
ENSG00000139350	NEDD1	995	1209	1619	1351	1179	1166	1033	1236	1451	1371	1182	1221	1175	1253	902	1328	817	1329	1082	1524	6.36125	8.35356	9.41336	8.52566	7.47569	8.25657	6.51276	6.73956	9.70836	7.1658	7.23156	9.21276	8.48074	8.71216	5.95381	9.38079	6.29243	8.44433	7.91795	9.14117	0.695214	-0.0357891
ENSG00000139354	GAS2L3	137	195	283	252	313	300	119	251	501	249	155	188	176	179	213	276	109	137	211	181	0.975358	1.47643	1.74684	1.68829	2.16348	2.13275	0.77415	1.41693	3.72401	1.26926	0.896567	1.31253	1.42229	1.26588	1.35023	2.05943	0.875401	0.879901	1.522	1.15214	0.0267443	-0.457231
NewGene_8633	NewGene_8633	242	196	207	167	207	209	382	394	166	138	312	390	512	327	270	492	156	323	207	344	1.95852	1.35249	1.33731	1.14648	1.48405	1.83033	2.53768	2.54285	1.30601	0.959486	2.2943	3.23465	4.01895	2.50624	1.76371	3.9135	1.2172	2.48645	1.6715	2.32717	0.0071669	0.585067
NewGene_8631	NewGene_8631	300	359	0	2	124	191	219	337	417	319	264	394	533	567	0	851	212	0	318	289	0.863615	0.994874	0	0.004165	0.384569	0.507735	0.573753	0.723184	1.18389	0.934133	0.620721	1.06042	1.8141	1.60686	0	2.43009	0.630154	0	1.03558	0.676828	0.47083	0.686682
ENSG00000131165	CHMP1A	1744	1340	1686	1312	1449	1259	1548	2145	1809	2634	1853	1463	1225	1594	1597	1716	1056	1632	1699	2084	18.0225	13.8869	15.549	13.3211	13.9865	13.2543	14.7802	17.9909	19.8737	21.179	16.9494	15.5709	14.035	16.6557	15.1305	18.9069	12.4297	16.2963	18.1439	19.3825	0.924	-0.00653428
ENSG00000064607	SUGP2	2007	1914	2318	2028	1754	1512	1983	2472	2201	2059	1725	2209	1695	1633	1991	2733	1368	1945	2258	2444	9.40494	9.22831	9.36203	10.3398	7.97563	7.50907	8.18139	11.0961	10.7591	7.58694	7.40867	11.2116	8.81255	7.9495	9.01031	13.8413	7.09027	9.12369	10.5535	10.3203	0.595766	0.0426432
ENSG00000064601	CTSA	3478	3284	3489	3135	3388	2971	3198	4467	3293	4282	3103	2835	2928	3083	3353	3471	1914	2809	3396	3871	41.9038	37.2016	39.1018	39.6391	36.9247	36.0507	35.4333	42.9798	44.3291	37.7293	34.5275	35.3875	40.0488	37.5912	38.9328	45.0598	27.2289	33.41	44.0454	42.0469	0.0248684	-0.120763
ENSG00000143919	CAMKMT	105	97	99	61	69	85	114	124	84	154	96	110	79	101	90	104	74	113	111	106	2.0015	1.84566	1.5924	1.00736	1.28333	1.59106	1.77105	1.84563	1.57318	2.29975	1.57874	2.04703	1.60142	2.14569	1.46931	1.93019	1.43945	1.9209	1.97131	1.70781	0.5277	0.0720532
ENSG00000102595	UGGT2	438	401	389	381	415	355	403	590	692	655	360	492	330	499	439	644	226	466	447	568	2.60832	2.36903	2.1022	2.20016	2.32578	2.19491	2.24178	2.86512	4.45083	3.43771	1.99378	2.88898	2.12857	3.12011	2.18111	3.78652	1.73267	2.59612	2.8416	3.18309	0.907697	-0.0130697
ENSG00000142065	ZFP14	388	282	295	270	285	269	268	350	412	415	289	261	249	362	279	420	205	340	404	350	1.58525	1.09549	0.919501	1.12545	1.00966	0.952072	0.947767	1.07538	1.60674	1.23503	0.95749	1.07049	0.949789	1.5855	0.957401	1.55693	1.10965	1.39981	1.43113	1.0903	0.72389	0.0325202
ENSG00000188517	COL25A1	1808	1590	1355	1183	1007	1050	986	1151	1132	986	1630	2800	1260	2171	2529	3859	1151	2009	2702	2323	6.51047	5.10579	3.81782	3.73757	2.98958	3.4047	2.80243	3.4427	3.74753	2.50239	4.60318	9.13783	4.41608	6.96706	7.42065	13.3862	4.17309	6.74065	9.15205	8.45476	1.10377e-07	0.898697
ENSG00000183684	ALYREF	911	701	704	654	784	774	686	798	755	1261	913	732	628	706	717	828	652	894	859	872	21.2369	16.5134	14.5442	15.0347	17.1761	18.4576	14.3777	15.1042	18.4247	23.0023	19.0179	17.5923	15.8933	16.688	15.4731	20.6335	17.3709	20.36	20.7121	18.4026	0.624588	0.0411003
ENSG00000109610	SOD3	3277	2673	1287	1572	1415	1387	2370	2417	1936	5672	1292	1893	1075	3896	1656	2845	1456	2776	2760	3156	77.0033	65.3945	25.1616	35.9805	33.1926	32.9095	49.5619	46.0297	47.6882	100.989	28.1406	42.7915	26.2989	90.6666	34.4355	73.5755	35.4163	66.7664	65.2326	68.9996	0.941576	0.0161575
ENSG00000109618	SEPSECS	463	365	482	388	361	366	424	455	456	522	431	398	358	403	486	479	305	407	461	573	2.13275	1.86106	2.03568	1.78608	1.58718	1.77196	1.82544	1.70536	2.19834	2.00721	1.77463	1.91067	1.79115	1.95696	2.15185	2.36015	1.60928	1.83351	2.35998	2.4271	0.210379	0.0734305
ENSG00000118271	TTR	237	276	117	119	316	283	297	278	440	481	77	65	72	107	238	85	188	218	325	92	6.24075	7.3869	2.68757	3.07785	7.85562	7.64418	7.0579	5.96174	12.1614	9.95072	1.79537	1.74388	2.03225	2.85578	5.81266	2.36773	5.69856	5.47693	8.91682	2.18976	0.00736404	-0.835581
ENSG00000118276	B4GALT6	738	764	969	776	880	938	868	999	948	823	852	727	615	811	958	809	733	893	886	783	5.10317	5.10089	5.85684	4.99253	5.771	6.66267	5.2403	5.55427	6.49614	4.1974	5.10573	5.09731	4.51201	5.69785	6.09981	5.92117	5.79555	5.82343	6.17419	4.95219	0.695534	-0.0395882
ENSG00000137824	RMDN3	690	627	728	698	645	592	695	758	611	740	617	705	523	763	740	866	473	551	619	721	7.7204	6.97645	7.27177	7.7549	6.60752	6.64329	7.03767	6.82239	7.05549	6.1273	5.92433	8.07369	6.31904	8.39393	7.59912	11.2258	5.99073	6.02831	7.16359	7.32378	0.834792	0.0168586
ENSG00000219626	FAM228B	267	266	299	287	226	156	283	353	216	498	272	352	282	262	278	231	219	369	257	278	6.11301	5.8517	5.99182	6.10652	4.59381	3.73221	5.73598	6.36026	4.985	8.10172	5.30016	8.17028	6.63441	5.88048	5.57573	5.32753	6.25864	8.08174	5.64508	6.34859	0.529162	0.0820741
ENSG00000137821	LRRC49	501	498	460	407	377	369	433	520	514	685	577	511	424	554	492	485	359	473	526	597	4.19011	4.38065	3.49016	3.40057	2.85506	3.23296	3.42389	3.54375	4.11278	4.32989	4.33467	4.06291	3.83358	4.77837	3.86286	4.16974	3.49148	3.99123	4.70026	4.48765	0.0172448	0.147567
ENSG00000214456	PLIN5	659	554	1048	944	636	578	859	1471	1260	1295	885	738	957	751	1501	1308	683	595	760	457	6.82929	5.72886	9.63196	9.68934	6.11298	6.06798	7.93221	12.467	13.5919	10.4059	8.125	7.81153	10.6571	7.89488	14.3714	14.5823	8.06418	6.01037	8.11517	4.25368	0.929786	0.0178517
ENSG00000105063	PPP6R1	1501	1235	1627	1577	1286	1110	1242	1755	1391	1838	1438	1093	1128	1150	1214	1848	790	1436	1282	1800	9.64431	8.09525	9.27707	9.98768	7.89349	7.31539	7.31398	9.25743	9.48093	9.26908	8.47402	7.30241	8.06908	7.52259	7.20648	12.7565	5.82148	9.16485	8.51896	10.4608	0.312273	-0.0846396
ENSG00000131831	RAI2	861	625	790	702	717	615	784	800	742	1078	586	615	559	884	708	794	511	887	743	946	9.27672	6.85976	7.7384	7.56517	7.18124	7.21651	7.8464	7.35951	8.41491	9.45373	5.71302	6.87554	6.59265	9.8193	7.03081	9.25143	6.24604	9.89238	8.31049	9.35572	0.746724	-0.0245466
ENSG00000175482	POLD4	2017	1885	1676	1725	1697	1619	1614	1966	1620	2844	2004	1809	1520	1996	1700	1563	1497	1795	1919	2289	61.3276	58.4812	43.9064	49.4564	47.5997	48.4346	43.5925	46.2352	49.6983	66.794	54.5296	54.3899	46.4622	60.0691	46.3134	47.133	48.5898	53.6641	61.2609	62.3413	0.622126	0.0362383
ENSG00000127511	SIN3B	1357	1166	1283	1164	1053	847	1092	1605	1442	1463	1107	1365	961	1093	1223	1662	786	1067	1450	1468	7.65505	6.54169	6.37578	6.5399	5.3848	4.68247	5.49524	7.37144	8.80461	6.37575	5.85855	7.5588	5.88673	6.2799	6.49703	10.6077	4.97984	5.9956	8.16072	7.22272	0.686824	0.0329953
ENSG00000172273	HINFP	428	382	439	424	376	303	441	492	427	515	413	437	339	440	439	435	311	395	474	510	3.72684	3.2191	3.32299	3.73062	2.91438	2.64505	3.36436	3.559	3.73487	3.48571	3.11255	3.73848	3.17095	3.72977	3.44196	3.81643	3.0322	3.2171	4.35253	3.9918	0.282387	0.0595336
ENSG00000172270	BSG	8873	9407	14687	13749	11331	11770	9301	14420	11733	13185	11561	11688	11241	9411	12528	12412	6597	8279	11335	12739	137.848	147.961	203.218	211.771	165.076	187.309	130.397	182.214	191.89	161.344	160.578	186.552	191.008	148.782	180.45	206.955	117.484	125.457	180.767	180.491	0.48799	-0.0744725
ENSG00000118898	PPL	1210	876	642	609	664	670	1462	1409	1013	2174	440	861	560	468	265	416	946	1139	1299	910	4.91955	3.59954	2.31239	2.44094	2.53512	2.78409	5.34471	4.65421	4.31427	6.91463	1.59827	3.60933	2.47079	1.92882	0.994496	1.80966	4.40066	4.52496	5.46655	3.34984	0.111179	-0.41572
ENSG00000118894	EEF2KMT	240	199	290	279	211	186	312	335	268	377	407	177	201	252	236	211	162	195	182	342	2.60821	2.19462	2.79118	2.99369	2.11527	2.06102	3.15946	2.96551	3.07379	3.19381	3.85836	1.93002	2.32651	2.7612	2.35943	2.42516	2.09708	2.14398	1.9933	3.33922	0.436367	-0.110716
ENSG00000186377	CYP4X1	287	329	364	310	345	329	331	466	321	292	420	430	330	266	326	285	222	237	351	356	3.08135	3.57153	3.46434	3.29275	3.48099	3.62096	3.19469	4.07032	3.60954	2.45791	4.03516	4.76694	3.8535	2.89215	3.24478	3.27824	2.72479	2.48399	3.90977	3.46441	0.983102	-0.00271235
ENSG00000186376	ZNF75D	396	348	453	351	357	340	423	528	490	504	390	429	396	441	388	438	273	377	496	535	1.79647	1.59378	1.82089	1.56875	1.5221	1.57659	1.72529	1.94566	2.32435	1.78876	1.57784	2.00499	1.9487	2.02503	1.62753	2.12279	1.41407	1.66733	2.3278	2.19915	0.327588	0.0612364
ENSG00000166819	PLIN1	455	146	66	23	13	23	812	133	45	264	9	124	179	237	64	63	37	30	414	16	3.90302	1.26847	0.496424	0.189197	0.100286	0.19411	6.27457	0.924775	0.396283	1.76932	0.06881	1.09656	1.66473	2.05704	0.503268	0.573294	0.357894	0.249881	3.67531	0.121591	0.346816	-0.67549
ENSG00000115446	UNC50	866	901	824	872	856	850	920	1012	1024	1382	847	1055	786	993	811	893	773	945	888	1222	17.4975	19.8556	14.5673	16.279	15.941	17.3224	17.6862	17.5456	22.4034	22.2194	15.2177	21.0775	18.257	21.4314	15.9481	20.1214	17.0747	17.6512	19.5558	22.8239	0.613699	0.0330698
ENSG00000113845	TIMMDC1	3409	3567	3862	3519	3262	3307	3980	4101	3275	4722	3728	3084	3241	3454	3350	2835	2945	3637	3323	3666	40.4175	39.8512	37.5129	38.0682	36.0329	40.9635	38.9465	38.3256	37.6905	45.9148	35.7868	36.6016	39.6437	43.7029	33.9271	35.1736	36.9696	40.9586	39.7941	39.9319	0.350542	-0.0693891
ENSG00000108256	NUFIP2	2472	2552	3531	2808	2837	3078	2936	3655	3686	3189	2862	2957	2958	2302	2749	2818	1907	2544	2729	3081	5.7803	6.02941	7.31811	6.47994	6.23245	7.36235	6.17185	6.9423	9.0182	5.8323	5.98078	7.12612	7.50713	5.45696	5.94723	7.04745	5.09871	5.80915	6.60283	6.52607	0.147068	-0.122292
ENSG00000104731	KLHDC4	430	341	436	472	271	241	348	488	454	495	409	532	418	415	545	368	373	402	521	450	4.1129	3.72038	4.03354	4.93587	2.6988	2.61777	3.43944	4.30295	4.63621	4.38611	3.71127	4.85338	4.85676	4.73062	5.28919	3.78203	4.55013	4.16494	5.54208	3.92208	0.0308553	0.252277
ENSG00000104738	MCM4	727	675	828	731	735	721	680	923	783	693	840	721	734	518	1015	875	404	562	824	900	4.51387	4.21279	4.55559	4.52727	4.29322	4.58792	3.80398	4.66439	5.09994	3.3872	4.65568	4.60765	4.96909	3.2528	5.85033	5.80015	2.90801	3.43038	5.30138	5.06204	0.7931	0.0313856
ENSG00000196455	PIK3R4	538	491	616	497	627	546	676	916	812	705	608	555	524	556	714	742	411	670	749	726	2.72024	2.50963	2.7586	2.4782	2.98039	2.82334	3.07178	3.7614	4.32264	2.78823	2.74684	2.89376	2.87722	2.84667	3.3592	4.01273	2.37669	3.30664	3.9217	3.32624	0.740342	0.0305848
ENSG00000196456	ZNF775	222	180	217	63	183	137	245	318	201	303	219	157	156	220	201	220	184	215	254	253	2.48794	2.0461	2.28675	2.30184	1.92302	1.57088	2.4686	2.90179	2.41305	2.66126	2.19133	1.86249	1.88895	2.50418	2.09443	2.78268	2.37268	2.37188	2.95028	2.5703	0.526385	0.106535
ENSG00000196453	ZNF777	434	399	440	379	374	336	309	468	397	430	398	392	285	321	304	406	237	349	499	444	3.40272	3.15933	3.05524	2.93123	2.75407	2.69523	2.17539	2.97889	3.25449	2.63928	2.78707	3.16581	2.42242	2.54657	2.20392	3.39937	2.12029	2.67315	4.04731	3.15292	0.427087	-0.0685714
ENSG00000196459	TRAPPC2	369	213	312	254	373	284	270	319	374	463	324	345	292	410	391	306	247	318	300	440	3.48012	3.19594	2.73578	2.55114	3.37266	3.23621	2.42654	2.55056	3.9689	3.40129	2.67885	4.32627	4.05716	4.13141	3.44627	4.5086	2.5788	2.99704	2.97754	3.96491	0.180058	0.138632
ENSG00000196458	ZNF605	701	687	750	650	571	491	747	762	775	612	635	683	627	650	788	843	457	755	721	926	1.90241	1.88624	1.80755	1.7409	1.81129	1.36862	1.83346	1.68853	2.20791	1.30059	1.54126	1.92703	1.85232	1.80984	1.97994	2.61193	1.41789	2.00676	2.06015	2.27773	0.13766	0.125668
ENSG00000197324	LRP10	3451	2931	3032	2633	2664	2308	2900	3723	3309	4444	2420	2649	2366	3377	2596	3938	1726	3189	3648	4476	12.7612	10.9688	10.194	9.57068	9.223	8.74909	9.60435	11.2888	12.9649	12.8565	7.96699	10.1254	9.51188	12.6525	8.98287	15.7253	7.30693	11.573	13.9899	15.0469	0.890537	0.0115617
ENSG00000104880	ARHGEF18	637	406	503	336	358	364	471	742	526	188	402	471	222	547	451	598	308	529	283	248	3.18614	1.98703	2.20895	1.62223	1.63223	1.97538	2.06452	2.94661	2.784	0.723431	1.65968	2.64724	1.17356	2.76181	2.02968	3.1015	1.85061	2.70566	1.39692	1.0855	0.666301	-0.0949267
ENSG00000104883	PEX11G	106	54	67	56	41	24	112	91	71	79	55	68	45	88	63	101	36	48	59	78	2.18239	1.24779	1.30997	1.31292	0.908713	0.449398	2.17084	1.69766	1.68563	1.24667	1.14135	1.65244	1.14529	1.78849	1.30611	2.36546	0.910566	0.934261	1.31449	1.59752	0.773455	-0.0614716
ENSG00000124155	PIGT	2470	2117	2414	2145	2462	2191	2402	3198	2593	3066	2278	2318	1907	2487	2384	2469	1577	2358	2511	3027	28.9046	24.5058	24.4618	24.4166	28.2107	25.8712	24.8123	29.5504	31.2203	30.655	24.0722	28.59	24.8689	29.6066	25.2115	31.1621	20.8426	27.5523	31.499	33.0787	0.386148	-0.0381598
ENSG00000197321	SVIL	13447	13318	22149	16352	14462	12838	15051	20132	15666	17856	14175	13341	16438	13023	15473	19827	9887	14991	17968	23706	47.3028	44.2775	64.2599	52.7837	44.5324	47.2573	44.0627	53.1237	54.2406	45.404	40.5996	44.3163	58.4285	42.5362	46.743	68.5947	36.9242	47.0313	60.0535	70.6643	0.710719	0.035977
ENSG00000197323	TRIM33	1032	1227	1555	1306	1205	1197	1155	1606	1825	1545	1240	1474	1229	1203	1343	1463	950	1163	1383	1522	3.16716	3.94156	4.21566	4.02801	3.52106	3.74164	3.18629	3.98537	5.89958	3.77508	3.42431	4.64051	4.07735	3.95888	3.80486	4.90599	3.3142	3.45352	4.36775	4.21268	0.991115	-0.000887371
ENSG00000124159	MATN4	253	139	14	29	37	19	104	48	86	294	8	96	40	477	36	78	24	279	506	123	3.10482	1.74498	0.135898	0.322161	0.396915	0.216969	1.18642	0.444994	1.12398	2.9544	0.081847	1.17492	0.510058	6.02755	0.382659	0.965025	0.310645	3.36298	6.3524	1.3837	0.223019	0.783387
ENSG00000104888	SLC17A7	200	163	103	104	170	142	127	118	138	261	96	62	69	214	119	183	68	190	165	153	1.70171	1.41627	0.776367	0.874123	1.36037	1.23254	0.9733	0.81355	1.22948	1.73973	0.731576	0.553949	0.632116	1.85074	0.939425	1.66822	0.660468	1.57896	1.46937	1.21112	0.441877	-0.162027
ENSG00000197329	PELI1	870	843	736	741	845	878	625	864	945	1102	757	946	648	787	925	930	494	731	855	1087	5.88303	5.76123	4.41132	4.94179	5.36814	6.07564	3.80011	4.74366	6.68675	5.82846	4.57218	6.59606	4.75343	5.39591	5.79078	6.72965	3.8201	4.82869	5.98278	6.65996	0.956799	0.00466001
ENSG00000140030	GPR65	66	43	51	41	64	55	32	43	68	129	19	23	51	106	33	64	32	48	19	49	0.365946	0.241235	0.249111	0.225286	0.336483	0.31512	0.159159	0.191487	0.396529	0.565257	0.093313	0.130555	0.308194	0.602944	0.170521	0.383819	0.205346	0.262162	0.109362	0.24407	0.27688	-0.315945
ENSG00000019144	PHLDB1	3445	2837	3158	2842	2502	2354	2606	3498	3426	3827	2317	2829	2199	2874	2800	4020	1760	2646	3333	3759	22.0399	13.5758	13.4867	12.9708	14.7367	11.5571	13.3896	13.3919	24.5277	14.3049	9.94866	13.3988	11.3306	13.6945	11.8565	26.4928	8.66525	12.7576	16.4014	16.328	0.631524	-0.0365311
ENSG00000076513	ANKRD13A	1213	966	1180	1125	1220	1095	1175	1470	1516	1629	1354	1292	1108	1212	1215	1405	869	1204	1468	1619	7.56819	6.09207	6.47863	6.86198	7.10093	7.11886	6.50701	7.35321	9.88913	7.88371	7.42859	8.18925	7.44242	7.63997	6.92393	9.28684	6.20125	7.23856	9.33328	9.13795	0.100589	0.0874986
NewGene_10089	NewGene_10089	45	38	43	56	23	33	56	83	112	102	85	79	37	23	70	29	40	54	53	87	0.426382	0.363622	0.367073	0.525076	0.206819	0.321111	0.482038	0.648731	1.12479	0.765539	0.734213	0.7856	0.380829	0.217551	0.618984	0.298732	0.432116	0.507011	0.523102	0.758468	0.927141	0.0246913
NewGene_10082	NewGene_10082	150	196	219	211	287	228	219	311	315	387	315	191	187	159	151	109	175	317	211	278	2.96341	3.91948	3.73766	4.14742	5.33021	4.57002	3.79523	5.02695	6.54348	5.91219	5.41892	3.85348	3.88959	3.08473	2.73286	2.29953	3.91998	6.12518	4.1665	4.81201	0.318609	-0.179362
NewGene_10083	NewGene_10083	59	43	66	59	64	57	65	77	66	50	42	40	50	32	46	54	44	66	34	52	1.21424	0.843663	1.12003	1.55294	0.948519	1.15991	1.03575	1.34964	1.09766	0.894834	0.750505	0.662254	1.04789	0.684379	0.830804	0.933468	0.905021	1.12325	0.676002	0.776823	0.0478647	-0.32533
ENSG00000107282	APBA1	688	495	519	459	503	440	523	598	459	521	389	691	564	459	508	717	361	512	771	767	2.67854	1.94487	1.7814	1.75581	1.83167	1.74694	1.85705	1.88518	1.86064	1.58124	1.34946	2.76228	2.37315	1.80271	1.82249	2.97642	1.60054	1.94023	3.09677	2.69245	0.10501	0.190761
ENSG00000185052	SLC24A3	505	603	2421	1611	1196	1350	1013	1584	759	672	1295	1036	1772	590	885	582	1296	433	936	694	3.25674	3.93093	13.8579	10.2619	7.25416	8.91382	5.88016	8.30604	5.12615	3.39264	7.47352	6.891	12.4145	3.85806	5.28654	4.0169	9.57288	2.72948	6.25427	4.05705	0.558911	-0.179337
ENSG00000152284	TCF7L1	829	524	528	562	484	420	657	624	589	1097	449	616	409	605	515	585	413	741	717	755	7.08595	4.5387	4.02252	4.7347	3.88381	3.67205	5.04815	4.33114	5.26411	7.33044	3.43036	5.50122	3.78681	5.23555	4.06835	5.37404	4.0481	6.18152	6.34105	5.84451	0.732288	-0.0393247
ENSG00000106771	TMEM245	3726	3765	4964	3830	4490	4527	4025	5532	4929	4101	4390	4614	4124	2814	4553	4967	2826	4325	4301	6039	11.883	12.1313	14.0847	12.0418	13.4602	14.7675	11.735	14.3435	16.5019	10.2432	12.4928	15.1676	14.2881	9.08455	13.5162	16.9804	10.3046	13.4615	14.1733	17.4292	0.838903	0.0210005
ENSG00000106772	PRUNE2	1469	1166	757	609	694	679	629	1052	1394	1972	279	894	421	515	512	1032	389	841	1291	1658	4.0756	3.2443	2.22546	2.13072	2.25393	2.06945	1.81596	2.72515	3.6193	5.13723	0.531167	5.04625	1.65491	1.72897	2.64038	3.20538	1.61378	2.37964	4.32592	4.18285	0.139528	-0.360935
ENSG00000103056	SMPD3	145	148	62	106	78	61	79	87	110	154	117	184	93	80	119	180	114	99	239	113	0.68908	0.69471	0.253231	0.504416	0.337173	0.288924	0.328087	0.343404	0.571103	0.627438	0.514311	0.938238	0.46666	0.384172	0.523246	0.894097	0.604059	0.45302	1.1662	0.487049	0.0322593	0.457228
ENSG00000151532	VTI1A	207	196	216	243	202	198	261	231	234	232	153	173	158	217	260	271	134	234	255	250	1.26814	1.21145	1.17181	1.50412	1.16179	1.24961	1.43684	1.14987	1.50803	1.12387	0.839196	1.09269	1.04608	1.35944	1.47585	1.77742	0.962578	1.40485	1.61685	1.50172	0.811593	-0.025718
ENSG00000103051	COG4	1457	1252	1437	1385	1465	1356	1174	1300	1549	1887	1510	1445	1497	1006	1123	1005	1191	1171	1673	2123	13.0467	11.1921	11.3869	12.2253	12.3134	12.4067	9.38761	9.23653	14.498	13.2105	12.0791	13.2755	14.5341	8.9603	9.29683	9.58751	12.1846	10.1989	15.4839	17.152	0.86692	0.0196494
ENSG00000275342	PRAG1	181	166	397	414	267	276	177	393	327	255	289	177	259	192	274	316	131	175	238	251	0.979325	0.876261	1.8484	2.1709	1.31669	1.48573	0.823278	1.67995	1.79525	1.04812	1.35675	0.959724	1.47073	1.00523	1.33656	1.77198	0.781418	0.91924	1.28547	1.19388	0.177371	-0.250284
ENSG00000179242	CDH4	97	68	43	62	42	30	58	61	60	60	34	56	31	99	32	77	42	48	131	38	0.376766	0.267229	0.145587	0.234997	0.153421	0.116222	0.199903	0.19046	0.241855	0.180545	0.117551	0.220937	0.127159	0.389138	0.11486	0.316762	0.184313	0.181817	0.524847	0.130635	0.779812	0.0743542
ENSG00000152133	GPATCH11	402	388	433	402	379	400	396	487	509	623	333	339	325	449	355	378	297	490	428	398	2.60613	2.6051	2.50095	2.72584	2.31805	2.65302	2.31036	2.58176	3.56343	3.25555	1.93189	2.26751	2.33542	3.01307	2.1304	2.62379	2.20577	3.10694	2.87466	2.34216	0.0629954	-0.140332
ENSG00000152137	HSPB8	12985	13248	12905	11198	11799	10435	12649	15992	12404	13976	13912	13553	11211	12031	12695	15067	8755	13129	11399	18073	153.125	157.851	134.861	130.486	130.824	125.939	134.256	153.21	153.077	129.074	146.722	164.949	143.616	143.794	138.58	190.057	118.214	151.268	139.077	193.041	0.18123	0.0839998
ENSG00000102908	NFAT5	2455	2480	2970	2305	2691	2686	2868	3354	3280	3099	2825	3480	2581	2265	2977	3135	2287	2701	2885	3052	4.47161	4.64571	5.17267	4.59499	4.65725	5.02919	4.78248	5.33755	6.74005	4.32485	4.61699	6.51314	5.15642	4.47927	5.28334	6.48698	5.09357	4.94199	5.38937	5.00908	0.340912	0.0758342
ENSG00000106483	SFRP4	2441	1998	530	588	962	1135	1041	963	1385	3699	662	1822	519	3340	540	2720	455	3163	3629	4832	20.8822	17.2665	4.01783	4.96087	7.7284	9.92798	8.00544	6.68673	12.3906	24.7488	5.08797	16.0598	4.81841	28.9715	4.27204	24.8812	4.44957	26.4234	32.1198	37.4445	0.16648	0.580724
ENSG00000102900	NUP93	682	574	768	629	754	604	677	870	824	819	724	738	651	577	721	847	429	591	739	768	6.36759	5.43881	6.46384	5.83701	6.70089	5.77946	5.65656	6.49301	8.0654	5.87605	5.94271	7.20071	6.76131	5.41909	6.23073	8.46161	4.76431	5.40703	7.1883	6.75382	0.804762	-0.018704
ENSG00000102901	CENPT	1019	857	742	698	573	582	708	995	612	1087	788	829	621	933	700	911	556	855	1062	971	12.8267	10.7193	7.85212	8.41215	6.83679	8.13945	7.61922	9.52164	7.49906	12.7332	8.08429	10.7206	9.46972	11.7325	7.29282	15.0361	7.11756	9.89061	14.8276	10.4773	0.166923	0.134043
ENSG00000106484	MEST	1343	1046	1150	1441	1037	1018	896	1025	1549	2591	836	1280	859	1291	1082	1241	460	1243	2424	2413	13.6002	10.6825	10.3186	14.3992	9.86763	10.5383	8.29542	8.43099	16.5477	20.562	7.5543	13.5267	9.44847	13.2595	10.1498	13.4874	5.32152	12.319	25.9142	22.3134	0.797646	0.0490546
NewGene_9221	NewGene_9221	282	226	162	154	137	96	102	114	226	412	130	238	113	229	198	530	46	177	163	707	1.24837	1.04804	0.645429	0.824435	0.550133	0.401214	0.40436	0.396468	1.02618	1.65686	0.509449	1.09477	0.585039	1.05226	0.787075	2.50216	0.242736	0.763846	0.712296	2.74555	0.191453	0.418568
ENSG00000018236	CNTN1	494	463	514	461	511	578	475	604	809	719	353	594	454	731	399	720	376	746	635	588	2.24943	2.2187	2.13126	2.17487	2.27231	2.83026	1.97899	2.26205	3.9265	2.59682	1.44749	2.91335	2.40533	3.4779	1.78709	3.6333	2.04334	3.39207	3.06679	2.51475	0.656036	0.0570158
NewGene_9228	NewGene_9228	191	177	211	172	237	185	197	214	205	268	146	209	238	253	227	267	112	210	228	244	1.82248	1.65722	1.93486	1.73374	2.1725	1.75175	1.71934	1.60712	2.20753	2.25188	1.20777	2.14039	2.58719	2.55984	2.08232	2.76747	1.18399	1.90007	2.25314	2.02956	0.280828	0.11508
ENSG00000178802	MPI	3654	3563	4643	3611	4724	4116	4696	5867	3995	4754	4148	4321	4119	3831	4075	3597	2829	4378	4043	4379	19.6833	18.7077	22.3233	18.8735	23.2936	21.8023	23.9019	26.1155	22.0277	18.9289	20.736	23.6298	22.78	19.5627	18.4731	20.468	16.8031	21.7171	21.5175	21.0624	0.461935	-0.0628517
ENSG00000143079	CTTNBP2NL	456	531	587	589	575	574	502	674	718	734	505	435	517	483	576	718	318	594	571	609	1.96049	2.30571	2.23783	2.50014	2.32242	2.52335	1.9551	2.35489	3.23017	2.46868	1.93938	1.9283	2.41214	2.10381	2.29009	3.30273	1.58442	2.49245	2.5421	2.37355	0.280788	-0.0955019
ENSG00000251369	ZNF550	353	287	434	411	399	362	418	589	407	415	427	463	416	362	476	315	322	292	398	442	2.36094	1.79617	2.57825	2.81388	2.47198	2.33555	2.4834	3.03138	2.86772	2.16138	2.84782	2.96857	2.75861	2.21148	2.81989	2.15914	2.41854	1.8585	2.54715	2.65037	0.838338	0.0244329
ENSG00000178809	TRIM73	148	124	132	149	101	114	158	238	143	148	150	194	147	124	110	141	110	113	191	123	2.70643	2.49273	2.10557	2.69617	1.73415	2.1042	2.68369	3.64868	2.73837	2.11944	2.66905	3.8188	2.96051	2.33157	1.95694	2.91075	2.31444	2.07554	3.69423	1.98281	0.820147	0.032989
ENSG00000092020	PPP2R3C	1042	979	954	789	868	819	1006	995	889	1478	980	892	765	1140	770	678	773	990	754	1145	14.64	13.9537	12.2108	11.2674	11.4161	11.7701	13.0144	12.2258	13.3677	16.5513	12.2534	13.2566	11.8768	16.9772	10.1864	10.6571	12.6627	13.4313	10.8843	14.4705	0.551498	-0.05789
ENSG00000185947	ZNF267	324	357	320	283	290	282	387	334	399	513	306	393	236	342	315	353	324	345	342	464	2.54182	2.91658	2.25311	2.13415	2.16218	2.20244	2.87489	2.16535	3.27545	3.08796	2.11204	3.18863	1.95598	2.65673	2.24878	3.10088	2.89276	2.73719	2.78624	3.37067	0.571292	0.0524647
ENSG00000185946	RNPC3	724	843	769	813	532	493	706	807	837	655	620	899	747	827	796	1009	685	602	792	852	5.96307	7.00501	5.48629	6.50981	4.31214	4.51989	5.65364	5.42515	7.24985	4.32524	4.4483	7.39476	7.10515	7.14894	5.68155	8.53829	6.7426	5.14561	6.50023	6.26864	0.0897195	0.197434
ENSG00000204628	RACK1	23944	20888	18982	19382	17551	14745	23780	19547	14629	35244	18531	20034	15622	31729	16640	14265	18716	23875	19902	20920	551.816	504.099	374.114	395.673	393.848	358.132	478.162	360.531	346.013	630.407	367.041	487.624	389.996	657.841	332.299	296.823	470.108	525.889	491.762	453.458	0.785257	0.0382438
NewGene_8173	NewGene_8173	67	64	73	80	98	100	124	68	88	144	79	45	72	33	67	37	63	77	45	16	2.76729	2.64351	2.79243	3.23328	3.84674	4.15822	4.51398	2.30837	3.88365	4.77383	2.93458	1.81932	3.31938	1.36499	2.48186	1.52058	2.98366	3.08221	2.01599	0.580182	0.0169796	-0.636337
ENSG00000114450	GNB4	1152	961	920	1038	1038	1013	905	1070	1306	1714	887	1021	798	1046	1016	1115	653	1037	1266	1291	4.54333	3.82825	3.21293	4.10783	3.84407	4.08587	3.20622	3.42545	5.3871	5.30294	3.12579	4.14833	3.41551	4.18055	3.70525	4.70144	2.94623	3.99157	5.16409	4.61021	0.378167	-0.0666314
ENSG00000114455	HHLA2	220	179	240	172	163	145	185	151	301	252	259	327	182	139	355	307	183	287	353	343	2.32645	1.90632	2.18911	1.75021	1.62092	1.53462	1.75544	1.25588	3.26758	2.02162	2.44882	3.56013	2.09985	1.4877	3.47796	3.43556	2.21495	2.97182	3.73033	3.22642	0.000942145	0.512354
ENSG00000162300	ZFPL1	733	665	549	628	551	579	647	819	695	1003	721	632	523	813	680	626	593	656	798	849	14.6213	13.3626	9.44999	12.4569	10.1768	11.8111	11.4339	12.7501	14.3281	15.3901	12.495	13.0993	11.1343	16.9998	12.4181	13.1422	13.888	12.7762	16.0769	15.0826	0.2634	0.0877955
ENSG00000142303	ADAMTS10	427	232	269	268	178	170	177	312	272	381	208	224	201	344	251	439	129	286	302	408	2.7235	1.79954	1.90784	2.1594	1.40743	1.6104	1.13395	1.81427	1.78276	2.02273	1.40559	2.02123	1.92264	2.6897	1.4801	3.02123	1.08049	1.94649	2.11329	2.32633	0.491745	0.110406
ENSG00000183479	TREX2	26	112	33	53	16	34	156	51	25	81	62	90	41	106	87	100	122	45	90	196	0.307868	1.27205	0.356114	0.607676	0.176756	0.382199	1.56406	0.487944	0.308426	0.767742	0.616969	1.06698	0.56399	1.25482	0.956231	1.20052	1.6603	0.488772	1.07731	2.04456	0.0418645	0.741494
ENSG00000183475	ASB7	460	369	491	405	402	477	519	498	566	648	385	453	390	451	471	397	304	453	465	537	2.34786	1.90544	2.23688	2.05429	1.92823	2.47971	2.38737	2.06975	3.06384	2.58402	1.75095	2.37373	2.15356	2.35479	2.21474	2.26135	1.7683	2.25774	2.46731	2.4815	0.182664	-0.094287
ENSG00000183474	GTF2H2C	307	364	315	224	371	391	286	438	466	452	328	280	302	315	269	428	302	312	402	196	2.84379	4.77942	2.39547	2.49212	3.56882	4.04873	2.34286	3.07355	4.90395	4.40283	2.71048	2.4973	3.30383	4.05678	3.21365	4.28342	3.23383	3.80775	3.86074	2.75198	0.448806	-0.112772
ENSG00000163516	ANKZF1	772	627	754	628	509	459	498	762	624	788	650	742	560	709	615	793	505	634	665	838	7.57087	6.21577	6.62118	6.08474	4.712	4.60894	4.47153	6.11606	6.41306	6.05302	5.77747	7.52416	5.96188	7.04839	5.59313	8.32714	5.67424	6.08565	6.77932	7.46563	0.0698245	0.137303
ENSG00000163517	HDAC11	704	533	594	567	526	448	691	902	695	921	621	643	495	624	569	672	501	648	758	878	6.49171	4.63843	4.53507	5.02927	4.23578	4.00672	5.52532	6.44595	6.26374	6.19963	4.89893	6.09	4.72176	5.4391	4.82724	6.18635	4.98259	5.4302	6.8438	6.88376	0.573159	0.0433192
ENSG00000163510	CWC22	508	608	610	455	467	508	550	600	604	801	439	562	419	639	458	732	368	543	564	674	4.05743	4.82712	4.60502	3.47016	3.64574	4.15831	4.19322	3.85333	5.41256	4.84426	3.1055	4.55699	3.51356	5.00433	3.38879	6.32586	3.25072	4.20589	4.56827	4.79225	0.843985	-0.0155294
ENSG00000163513	TGFBR2	6740	6318	5784	5388	6028	5974	5318	6610	7831	8288	5674	5756	5215	7270	6495	8426	3299	6672	6970	8391	37.0414	35.0947	28.1985	29.2033	31.1565	33.6054	26.2639	29.5437	45.0215	35.6647	27.8884	32.5857	31.094	40.4898	33.0203	49.5203	20.7387	35.8107	39.6145	41.7714	0.567091	0.047024
ENSG00000205572	SERF1B	424	410	422	443	304	276	298	307	469	776	463	419	291	550	377	361	443	515	311	491	9.10466	9.44996	8.77009	9.00972	5.89122	5.74697	5.58558	5.23523	10.396	14.8895	8.69092	8.79104	6.80354	12.1753	7.72989	8.51497	11.5889	11.0557	7.56009	10.2285	0.350259	0.142222
ENSG00000205571	SMN2	767	669	742	607	406	366	519	578	765	993	695	803	343	719	663	684	368	642	320	768	13.3324	11.9259	11.318	10.5409	6.61332	6.4652	8.11169	8.29396	14.295	13.5724	10.8156	14.4471	6.2682	12.8943	10.5032	12.7085	7.31659	10.6241	5.47021	12.066	0.917041	-0.0166885
ENSG00000127540	UQCR11	6453	6972	5121	6792	5511	4930	7761	6164	4475	11865	6382	5459	5600	7668	5371	3730	7250	8189	5170	5153	124.104	135.592	87.6743	129.008	103.369	96.8411	143.791	96.2028	90.5088	178.288	110.008	108.377	116.766	149.207	95.8313	77.1663	159.528	153.61	103.146	89.6136	0.933063	-0.014302
ENSG00000106070	GRB10	2494	2143	1856	1724	1463	1362	1368	1552	2537	2477	1830	1572	1381	1465	1440	2176	980	1943	1922	2617	13.1724	11.4091	8.71259	9.18757	7.53197	7.18701	6.86528	7.14144	14.8667	10.3572	8.59048	8.90409	7.76825	7.99935	6.84977	12.4572	5.87605	11.339	10.8524	12.4613	0.505109	-0.0797578
ENSG00000156232	WHAMM	385	474	583	472	435	402	424	605	394	495	474	525	362	340	446	474	253	437	484	560	1.91388	2.38185	2.57013	2.31257	2.03153	2.04287	1.89324	2.44411	2.04593	1.92339	2.10672	2.68822	1.95332	1.71163	2.04862	2.51998	1.43703	2.11893	2.48713	2.51942	0.640481	-0.0458392
ENSG00000125944	HNRNPR	2865	2768	3513	2975	3105	3095	3086	3805	3161	4028	2998	3023	2884	2892	3132	3271	2063	3240	3453	3847	24.5776	21.6281	21.4417	23.5434	21.2703	24.0425	21.0317	24.2678	23.4652	25.5519	21.8516	25.1953	24.5229	22.2888	22.015	23.9172	18.7776	23.615	18.8137	26.4012	0.872161	-0.00755864
ENSG00000090316	MAEA	1768	1448	1794	1573	1467	1504	1860	2188	1430	1882	1567	1502	1382	1718	1787	1803	1037	1608	1590	1877	20.3846	16.799	18.7847	18.3566	16.2548	17.63	19.1419	20.3091	17.0698	17.311	16.0675	18.3034	17.1845	20.1352	19.4081	23.0898	14.8765	17.9751	18.8614	19.5659	0.672291	-0.0284612
ENSG00000106078	COBL	1907	2545	2318	1717	1397	1368	1610	2263	1764	2126	2566	1847	1633	2616	1880	2435	1303	2644	1753	3269	14.0213	18.9386	14.8133	12.3907	9.24748	9.92204	10.9356	13.4334	13.1438	12.1338	16.2345	13.8678	12.9056	19.4	12.4723	18.7087	11.4853	19.209	13.085	20.8873	0.0292825	0.257694
ENSG00000008394	MGST1	607	497	94	177	208	208	682	488	285	977	86	521	138	1186	139	331	322	400	532	444	16.8819	13.8713	2.38651	4.84448	5.37675	5.88317	17.0229	11.0417	8.18261	21.1584	2.08545	14.8409	4.04397	33.5427	3.53402	9.94116	10.2231	10.7776	15.3281	11.2686	0.884437	0.0609581
NewGene_9638	NewGene_9638	168	237	496	439	208	218	277	252	360	383	209	273	374	365	366	274	209	193	221	427	1.26026	1.79827	3.30588	3.26144	1.51215	1.67768	1.87104	1.62768	2.83648	2.39215	1.404	2.11366	3.05672	2.8608	2.71494	2.27098	1.91453	1.41498	1.71579	2.96356	0.932582	0.016341
ENSG00000130414	NDUFA10	6597	6544	8356	6524	6677	6345	7145	8961	6511	7070	7452	5641	5806	5664	7902	6579	4193	5968	6155	7149	34.5618	34.3038	39.2733	33.7638	33.0736	34.3526	33.4918	38.2519	35.6177	28.7741	34.9242	30.508	33.1586	30.2235	38.3829	36.9691	25.5472	30.7617	33.2585	34.0417	0.17705	-0.114246
ENSG00000130413	STK33	346	375	475	351	364	406	347	474	425	436	406	450	330	314	394	405	284	416	374	467	3.38772	3.88785	4.19741	3.01754	3.27272	3.87973	3.15355	4.41678	3.86807	2.99037	3.32652	3.83602	3.322	3.18667	3.37995	4.43417	3.71427	3.79997	3.77177	4.09028	0.923954	0.00767091
ENSG00000050628	PTGER3	188	158	152	174	213	234	89	77	149	136	61	108	131	89	56	187	61	114	133	262	1.08326	0.907535	0.625098	0.936199	0.978122	1.8381	0.384122	0.303278	0.6525	0.696335	0.260208	0.546536	0.741656	0.46641	0.287359	1.26583	0.293836	0.723545	0.609724	1.81643	0.123587	-0.402308
ENSG00000164898	FMC1	975	987	898	983	798	892	1064	1070	838	1780	1120	820	900	1137	971	597	971	1000	924	865	20.4412	20.9106	16.6783	20.3342	15.7089	19.1189	20.0516	18.2115	18.3733	29.1969	20.9754	17.7227	20.4761	24.1501	18.84	13.379	23.2766	20.4813	20.0509	16.4222	0.826292	-0.029279
ENSG00000164896	FASTK	4312	4154	4642	4179	3840	3495	4079	5227	3865	5947	5174	4471	3904	4148	4799	4153	3455	4319	4360	5683	63.1192	58.4896	57.2892	59.2759	54.5149	50.3049	51.4326	59.7384	56.8898	65.751	64.9826	65.143	59.6551	59.1388	61.8677	65.1556	55.5861	58.7072	63.8535	72.3047	0.0837032	0.103487
ENSG00000164897	TMUB1	916	986	1036	947	799	787	1002	1075	713	1295	1099	991	748	1097	964	856	672	923	973	1227	16.7755	18.298	16.9956	17.2025	13.6308	14.8564	16.4764	15.9038	13.5597	18.5448	18.0999	18.5891	14.8201	20.4347	16.3396	16.6336	13.8205	16.6191	18.2864	20.4404	0.395661	0.0675135
ENSG00000044446	PHKA2	495	417	760	614	422	400	523	794	644	475	451	541	530	474	695	694	419	443	597	585	2.25817	1.91873	3.07124	2.76358	1.80811	1.86709	2.14395	2.94251	3.0735	1.69254	1.83925	2.54283	2.62207	2.18993	2.93195	3.38352	2.18715	1.97256	2.81917	2.41871	0.718898	0.0466703
ENSG00000155621	C9orf85	339	335	323	360	288	257	347	302	424	570	398	370	263	394	317	330	206	408	323	377	4.27094	4.56411	3.73065	5.27706	3.85786	3.29802	4.60424	3.51709	6.50386	6.49224	4.41511	5.04246	3.53679	5.01922	4.21415	4.7168	3.48407	5.19871	4.15071	4.1648	0.915777	0.0102664
ENSG00000182704	TSKU	1481	1197	1077	933	862	903	1255	1417	921	1567	975	965	934	1167	942	968	676	1221	1338	1425	14.1358	11.3524	10.0675	10.5796	8.31064	9.2333	11.3403	11.088	11.8686	11.8972	8.61705	11.0498	10.4234	11.7087	8.72799	10.6533	8.11156	14.0949	14.1532	12.4605	0.510878	-0.0630542
ENSG00000182700	IGIP	1294	1211	1287	1029	1084	1055	983	1355	1219	2073	1124	1420	1009	1439	1070	1005	872	1280	1682	1748	9.49556	8.97693	8.36486	7.44917	7.47292	7.91403	6.48162	8.07478	9.35784	11.8947	7.36676	10.7356	8.03178	10.7032	7.26406	7.88022	7.3156	9.1728	12.7661	11.6191	0.367837	0.0838799
ENSG00000155629	PIK3AP1	378	323	269	216	328	254	274	368	382	427	157	250	148	306	161	326	179	347	276	338	1.99698	1.71863	1.25944	1.12326	1.6258	1.36793	1.30099	1.57842	2.1074	1.76321	0.739787	1.35829	0.847668	1.63853	0.786394	1.83951	1.08039	1.78958	1.5081	1.61294	0.0291287	-0.311391
ENSG00000186638	KIF24	174	147	86	117	114	101	140	200	321	217	182	256	135	116	249	272	78	272	340	203	0.719471	0.611437	0.314446	0.476608	0.442203	0.425248	0.515673	0.670956	1.38754	0.699787	0.672427	1.09189	0.606165	0.483321	0.950829	1.19981	0.366924	1.09733	1.45579	0.75848	0.0439469	0.447225
ENSG00000186635	ARAP1	4205	3008	2878	2677	2443	2119	3155	3578	3336	5161	2439	2733	2096	3521	2559	3478	2155	3131	3628	3376	23.0127	16.5419	14.0356	14.0885	12.4244	11.8964	15.2217	15.47	18.5877	21.7143	12.0965	15.8818	12.7284	19.2092	12.8339	20.463	13.4866	16.5871	20.1522	16.7605	0.423974	-0.077608
ENSG00000196159	FAT4	830	687	704	603	543	608	612	679	902	947	516	502	688	738	726	1086	375	767	803	1234	1.30536	1.09125	0.981309	0.935642	0.801885	0.978011	0.865791	0.86789	1.48539	1.16525	0.724766	0.813666	1.17476	1.1772	1.05629	1.82631	0.673501	1.17896	1.30767	1.75902	0.388024	0.109847
ENSG00000196154	S100A4	4252	2847	823	1614	1642	1320	2724	1841	2172	8996	1218	2544	942	5645	1060	1777	1960	4560	3498	2878	181.998	123.177	31.0469	67.8958	66.16	57.4724	104.834	63.8384	97.1338	301.601	46.536	111.878	43.6341	245.486	42.132	81.2028	95.443	190.669	154.354	111.313	0.965609	0.0167256
ENSG00000196155	PLEKHG4	262	199	134	143	117	67	149	148	171	260	137	219	101	217	155	287	97	130	352	317	0.956573	0.777785	0.544253	0.510957	0.402757	0.249975	0.539407	0.44299	0.697662	1.18296	0.618264	0.833361	0.479215	0.871075	0.657907	1.14135	0.507563	0.591045	1.37541	1.29661	0.125839	0.33309
ENSG00000196150	ZNF250	292	275	315	293	298	247	284	355	301	340	322	283	265	330	261	320	194	328	310	349	1.42571	1.62338	1.33022	1.53849	1.47437	1.47845	2.10585	1.5539	1.34852	1.66669	1.55698	1.39849	1.63696	1.65652	1.25959	1.98799	1.28209	1.61215	1.80386	1.93248	0.438775	0.0470073
ENSG00000196151	WDSUB1	280	313	413	326	370	392	295	302	439	566	318	350	383	384	381	347	365	238	324	436	4.0741	4.6017	5.01328	4.30412	4.79101	5.7691	3.64434	3.4614	6.32263	6.08153	3.82521	4.90631	5.68182	5.32265	4.86831	5.10219	5.91807	3.17641	4.77522	5.53379	0.836467	0.0272038
ENSG00000196152	ZNF79	95	122	128	155	96	92	118	143	108	161	84	130	104	105	106	114	76	147	127	96	1.09904	1.42261	1.31805	1.79272	1.04139	1.09269	1.2467	1.37745	1.30413	1.48898	0.898166	1.55036	1.33691	1.27539	1.1423	1.40128	0.998893	1.68429	1.52297	0.999912	0.50515	-0.0841594
ENSG00000128340	RAC2	369	198	211	179	218	142	172	145	187	426	93	122	78	248	109	192	109	317	100	182	6.31415	3.4129	3.19193	3.01107	3.50712	2.48608	2.64408	2.01485	3.3458	5.70297	1.41057	2.1361	1.44558	4.28998	1.71961	3.51098	2.12686	5.29024	1.76899	2.81569	0.053274	-0.45884
ENSG00000128346	C22orf23	154	156	210	141	121	159	119	231	212	193	211	160	163	98	182	177	91	133	189	201	2.24056	2.29695	2.76584	2.00994	1.68691	2.43428	1.53525	2.7666	3.16405	2.20286	2.92446	2.57416	2.5909	1.45775	2.72918	2.71081	1.56187	1.92738	2.99085	2.68116	0.94812	-0.00901043
ENSG00000120594	PLXDC2	1774	1626	2247	1874	1763	1553	1029	1602	2216	2367	1283	1495	1515	1952	1575	2800	912	1889	1931	2613	3.61072	3.34262	4.0529	3.76203	3.37064	3.23056	1.88247	2.64727	4.71901	3.76689	2.33305	3.13389	3.3452	4.10443	2.96554	6.09275	2.12932	3.75369	4.06531	4.81696	0.782723	0.0367142
ENSG00000175395	ZNF25	1309	1343	1593	1127	1325	1286	1458	1738	1643	1767	1227	1583	1331	1613	1282	1414	1177	1502	1415	1778	8.0247	8.31567	8.65492	6.81231	7.63148	8.05961	8.03006	8.65294	10.5356	8.46975	6.71791	10.0016	8.85447	10.0205	7.27002	9.27024	8.25337	8.99287	8.9733	9.8695	0.424109	0.0512864
ENSG00000175390	EIF3F	5776	5770	5352	4916	4329	4159	5685	5860	4207	7427	5209	5199	4681	6995	5077	4583	4287	6156	5540	6067	43.945	81.0506	50.9819	60.8943	52.7792	38.1749	69.6801	68.5087	49.1414	91.0338	51.9182	77.4198	70.7429	113.195	57.2238	60.6745	61.4164	83.4581	70.2868	76.2888	0.299677	0.0891256
ENSG00000198088	NUP62CL	28	44	51	39	62	35	40	67	37	37	49	54	32	29	81	34	44	40	35	47	0.391201	0.693052	0.764963	0.695334	0.863751	0.543712	0.672303	0.821921	0.552107	0.418179	0.665412	0.802833	0.520086	0.424447	1.40177	0.559558	0.716613	0.651525	0.519385	0.788632	0.665844	0.0966034
ENSG00000198089	SFI1	201	198	142	178	88	85	181	190	219	302	151	151	122	174	169	258	77	169	222	203	1.20608	1.20125	0.758953	1.14521	0.500307	0.516305	0.979034	0.956502	1.41969	1.41575	0.815202	0.946819	0.791821	1.05666	0.953158	1.68002	0.52539	0.991616	1.40172	1.12024	0.994484	-0.00115593
ENSG00000134882	UBAC2	2054	1773	2285	2047	1899	1769	1905	2368	2384	3121	2243	1998	1935	2346	2556	2253	1549	2331	1957	2684	23.2042	20.8817	23.1351	22.464	20.6966	20.6458	20.2379	21.993	28.4051	27.0579	22.2144	23.4273	23.9051	26.8391	26.6626	28.013	20.009	25.9179	23.0466	27.7965	0.0935625	0.0968312
ENSG00000198087	CD2AP	1099	1131	1323	1110	1325	1224	1158	1438	1745	1514	1252	1034	1105	953	1206	1127	886	1028	1164	1248	5.15208	5.35497	5.49482	5.13366	5.83594	5.86685	4.87922	5.47492	8.55826	5.55142	5.24355	4.99642	5.62084	4.52654	5.23002	5.64811	4.75049	4.70663	5.64501	5.30029	0.0383652	-0.170165
ENSG00000198081	ZBTB14	500	456	574	531	445	429	402	545	573	728	444	416	391	552	448	552	349	583	529	644	4.162	3.64582	3.84726	3.92152	3.37301	3.39141	2.98155	3.69055	4.79559	4.47388	3.1688	3.08331	3.60482	4.51099	3.28251	4.94091	3.11002	4.57391	4.44388	4.43452	0.901071	-0.00871788
ENSG00000134884	ARGLU1	1988	2036	2258	1863	1612	1715	1906	2418	2394	2601	2678	2531	1890	2144	2260	2778	1610	2056	2316	2522	14.8812	15.3936	14.9793	13.7556	11.3327	13.1243	12.822	14.697	18.7487	15.2295	17.9123	19.5252	15.3504	16.2614	15.6477	22.2361	13.779	15.0306	17.934	17.0985	0.000817521	0.206735
NewGene_2903	NewGene_2903	83	133	63	53	44	42	35	67	66	105	91	99	71	103	66	54	58	135	81	115	1.07191	2.02382	0.832137	0.70611	0.573014	0.831103	0.386432	0.938454	0.846014	1.51647	1.11536	1.42969	1.06044	1.72865	0.887712	0.781399	1.05093	2.16632	1.27365	1.34686	0.0596263	0.411123
NewGene_2901	NewGene_2901	87	85	97	69	55	70	50	75	67	81	129	85	79	66	107	95	67	61	63	70	1.10719	1.20798	1.07835	0.845936	0.700281	1.14059	0.574379	0.802299	0.929948	1.03726	1.47249	1.0983	1.07668	0.838038	1.24036	1.43211	0.964514	0.873673	0.812397	0.822594	0.165346	0.240146
ENSG00000198336	MYL4	5668	4509	8966	6991	5096	4398	17585	15941	9765	12308	15386	8537	9548	8802	10391	9957	5955	13258	3356	7040	177.477	142.129	247.199	213.352	153.471	138.007	497.09	415.187	316.976	307.835	438.112	280.954	324.041	277.229	299.208	341.154	219.162	404.627	108.842	199.934	0.595831	0.133761
ENSG00000198331	HYLS1	150	152	147	162	140	104	156	160	165	235	135	154	114	177	108	161	107	190	109	180	1.83806	1.88863	1.59547	1.96312	1.60907	1.30514	1.72398	1.59989	2.11594	2.25373	1.47842	1.94897	1.60262	2.51427	1.22471	2.113	1.48586	2.35257	1.37814	1.98925	0.618595	-0.0544641
ENSG00000276547	PCDHGB5	47	47	177	424	212	100	169	142	317	69	28	74	190	139	87	331	93	138	57	421	0.4383	0.448893	0.927094	2.38703	1.13339	0.601033	0.892823	0.760718	1.94269	0.50905	0.234934	0.431595	1.2105	0.795708	0.761983	2.01248	0.610304	0.747804	0.560083	2.1142	0.737073	-0.143743
ENSG00000160796	NBEAL2	591	394	477	559	333	238	404	546	511	579	483	441	404	443	504	838	283	541	505	553	1.6966	1.14226	1.21448	1.58305	0.897534	0.698156	1.37997	1.27462	1.53608	1.30196	1.24133	1.30509	1.2595	1.28888	1.92696	2.57372	0.927276	1.51876	1.53216	2.13423	0.187841	0.175337
ENSG00000160799	CCDC12	963	941	890	936	872	709	991	1049	906	1407	1027	1063	801	953	991	932	721	1021	949	1060	22.2614	22.1285	18.2362	21.3565	20.4549	17.4199	20.6016	19.7042	23.4584	26.272	22.5793	27.4031	20.0933	22.9627	21.2138	23.0131	20.6227	23.0259	22.9507	23.8862	0.327851	0.0594888
ENSG00000167220	HDHD2	1159	1238	1861	1619	1195	1011	1519	1742	1566	1733	1744	1504	1490	1393	1407	1367	1102	1388	1497	1991	13.5791	14.3092	18.8893	18.3254	12.871	11.9224	15.6576	16.2614	18.9338	15.6057	17.8949	17.8014	18.562	16.3868	14.9491	16.8961	14.5078	15.6172	17.8256	20.7172	0.257421	0.100237
ENSG00000168040	FADD	528	524	471	598	481	415	484	573	440	826	468	522	488	585	462	547	317	594	538	614	7.27647	7.29549	5.74275	8.12439	6.22815	5.83777	5.98897	6.40862	6.33897	8.89675	5.75554	7.40337	7.29404	8.16774	5.88612	8.04986	4.98375	7.99456	7.66883	7.65786	0.852586	0.0149838
ENSG00000104886	PLEKHJ1	1419	1179	1164	1137	1011	1053	1363	1424	1128	1991	1468	1240	950	1422	1324	1168	1029	1439	1291	1505	29.8162	24.8283	21.3492	23.3045	20.1168	22.7036	25.5742	24.3882	23.6355	32.3126	27.2265	26.8452	21.5262	29.8575	25.4395	25.7963	23.6874	28.8217	26.8938	27.6386	0.299655	0.0814621
ENSG00000176155	CCDC57	245	174	138	160	115	92	154	270	209	280	170	245	186	205	179	273	151	217	286	272	2.49326	1.91973	1.09634	1.68016	0.905128	0.880774	1.31212	1.85915	2.10201	1.85099	1.33044	2.49873	1.86501	2.48745	1.53165	2.83994	1.51252	1.78666	2.84175	2.54206	0.0174268	0.338777
NewGene_11921	NewGene_11921	56	54	77	46	60	79	114	119	77	11	92	57	95	27	82	45	73	17	31	54	1.01404	1.23116	1.39393	0.956873	1.07654	1.61778	2.27072	1.94087	1.53284	0.132591	1.74893	1.18915	2.01148	0.459952	1.84073	0.96112	1.59557	0.277119	0.588513	0.870528	0.640493	-0.171047
ENSG00000132109	TRIM21	381	325	298	271	325	297	330	444	490	684	278	286	187	386	262	416	295	326	372	444	5.30948	4.43405	3.56868	3.52582	4.05507	4.11882	4.05786	4.81842	6.8278	7.31369	3.42278	3.88432	2.66777	5.15622	3.28743	5.86432	4.88933	4.30121	5.67732	5.6944	0.237559	-0.149871
ENSG00000148303	RPL7A	34071	30767	21232	25212	21737	18599	31297	24498	18606	52073	24309	24279	21269	44839	22552	20751	25413	32996	27829	26744	970.332	885.146	535.93	708.387	581.634	541.566	801.077	566.579	554.329	1160.04	618.634	712.45	657.37	1294.29	594.278	631.937	827.709	917.641	820.044	689.879	0.678724	0.0665766
ENSG00000148300	REXO4	832	729	924	858	625	606	738	878	749	1064	782	618	756	864	873	870	508	722	850	914	8.94576	7.9071	8.80073	9.09012	6.30213	6.74489	7.11866	7.67547	8.48095	8.95403	7.51218	6.84148	9.12437	9.40604	8.72038	10.0071	6.25196	7.58052	9.54379	8.9017	0.702813	0.0280022
ENSG00000188488	SERPINA5	1071	957	1407	1095	1316	1063	1256	1603	2100	2618	538	1353	429	783	499	576	1402	1038	933	918	12.1258	11.1303	13.9696	12.3102	13.9686	12.2909	12.7581	14.6701	25.0405	23.3735	5.58342	15.6268	5.31142	8.8975	5.15222	7.02229	18.3086	11.418	10.9615	9.30181	0.00597011	-0.620897
ENSG00000095066	HOOK2	1487	1359	1456	1341	975	860	1143	1699	1602	1898	1664	1442	1008	1427	2052	2325	992	1357	1702	2014	17.2865	15.3718	14.1761	14.9318	9.66334	9.78514	11.8365	15.5826	18.9893	17.0926	15.9531	17.1051	12.5971	15.7319	21.0108	28.9012	13.3988	14.9788	20.251	19.9604	0.0134747	0.280615
ENSG00000135823	STX6	504	442	461	423	549	495	415	553	627	739	370	456	355	516	471	507	331	463	572	594	2.63517	2.32935	2.12901	2.1795	2.69585	2.64208	1.94741	2.35045	3.43315	3.01882	1.72847	2.46525	2.01399	2.73576	2.27746	2.83323	1.97489	2.36057	3.08812	2.8148	0.220788	-0.100169
ENSG00000135821	GLUL	15698	12657	11280	10795	11546	10248	12838	14079	11362	18228	8190	13092	10001	16682	8863	10743	8545	15629	14314	14189	98.991	75.9257	62.7045	63.7979	65.5417	65.2887	70.0943	71.7201	70.7392	85.6291	43.1699	83.238	64.9317	100.363	50.2582	69.9498	58.0477	93.2999	88.531	76.4251	0.811824	-0.0266727
ENSG00000135829	DHX9	2492	2419	2966	2292	2750	2248	2239	3240	2963	2732	2060	2313	2494	2259	2638	3148	1503	2469	2604	3091	14.9122	14.6202	15.7286	13.5308	15.4637	13.7555	12.0403	15.7452	18.5509	12.7891	11.0152	14.2635	16.1928	13.6983	14.605	20.1417	10.2838	14.427	16.1254	16.7556	0.596435	-0.0416006
ENSG00000135828	RNASEL	557	379	451	386	301	311	412	468	577	786	256	349	485	460	314	360	268	377	452	516	3.34072	2.28593	2.39361	2.27663	1.69203	1.90313	2.21833	2.27446	3.61766	3.67922	1.36265	2.15564	3.15286	2.79115	1.73753	2.30594	1.83141	2.20114	2.79823	2.79549	0.186746	-0.173421
NewGene_1765	NewGene_1765	98	55	41	55	56	55	76	87	64	114	89	155	88	218	44	182	54	52	159	85	0.818625	0.485353	0.287981	0.470358	0.384772	0.668002	0.473799	0.545384	0.577603	0.701518	0.582095	1.27913	0.757367	1.84447	0.324776	1.98034	0.495384	0.389249	1.58896	0.643112	0.00361511	0.753722
ENSG00000083520	DIS3	1073	1054	1393	1002	1210	1200	1045	1486	1284	1631	1077	1262	1177	1042	1174	1242	886	1164	1333	1409	2.88051	2.79676	3.25384	2.87092	3.16658	3.38571	2.81408	3.19053	3.64925	3.16165	3.056	4.24739	3.78382	2.97241	2.87673	3.84002	2.7833	3.15943	3.52883	4.27983	0.948728	0.00422549
ENSG00000249242	TMEM150C	522	346	467	415	365	307	333	324	352	289	191	387	291	412	487	447	281	425	356	413	4.17645	2.72445	3.33208	3.36665	2.69298	2.51488	2.32914	2.15291	2.93716	1.74921	1.31497	3.09622	2.49626	3.46429	3.66101	3.80658	2.58929	3.41069	2.83596	2.9153	0.807023	0.0380823
ENSG00000166228	PCBD1	1793	1748	1722	1676	1833	1610	2132	2034	1369	2558	1752	1621	1707	1909	1741	1340	1511	1963	1627	1652	45.2304	44.5372	38.4835	41.6908	43.4335	41.5288	48.3267	41.6654	36.1256	50.4665	39.4921	42.1194	46.7109	48.8022	40.6188	36.1264	43.5866	48.3389	42.4565	37.7318	0.660807	-0.0445284
ENSG00000131747	TOP2A	40	36	69	69	29	48	83	42	100	95	58	52	33	43	68	62	20	93	100	71	0.175621	0.157872	0.268393	0.297294	0.116557	0.215866	0.327632	0.146995	0.456818	0.32731	0.226754	0.233494	0.156618	0.191253	0.276479	0.291847	0.099738	0.397799	0.45567	0.281902	0.904164	0.0294833
ENSG00000173253	DMRT2	289	334	406	322	371	310	335	404	385	547	257	417	317	163	325	208	178	281	476	384	3.71227	4.95845	4.95557	3.86689	4.65412	4.55234	4.05559	4.05635	5.6829	5.63318	3.18275	6.09354	4.70206	2.07526	3.68313	3.08009	2.72753	4.03943	6.90287	4.87247	0.138905	-0.225915
ENSG00000173258	ZNF483	45	51	31	38	31	28	46	61	55	79	32	41	15	38	26	44	23	51	43	71	0.394193	0.514867	0.230687	0.376583	0.226294	0.265691	0.382042	0.433625	0.461581	0.698243	0.297966	0.368282	0.111964	0.388948	0.192452	0.387741	0.352289	0.6346	0.393858	0.820098	0.290802	-0.211624
ENSG00000116161	CACYBP	2642	2631	2429	2303	2612	2571	2692	2711	2357	3607	2828	2381	2234	2630	2308	2417	1917	3027	2429	2664	25.0956	24.2528	19.6744	20.7444	22.3547	24.2779	22.0762	20.129	24.6882	25.9145	23.0544	22.4082	22.4115	24.2946	19.5177	23.6514	20.689	28.1321	22.9104	22.0249	0.746198	-0.022929
ENSG00000271092	TMEM56-RWDD3	90	28	43	45	23	88	33	47	31	25	20	33	13	162	52	43	35	39	58	67	3.3265	0.468257	0.638712	0.752726	0.394113	2.88092	0.548148	0.636227	0.537842	0.320033	0.375461	0.562277	0.224932	5.2777	0.964471	0.769754	0.667577	0.662608	1.0462	1.02073	0.581111	0.208076
ENSG00000021776	AQR	843	775	909	755	808	852	926	1038	1187	995	781	845	772	717	976	896	530	828	938	1027	2.24176	2.05629	2.15607	1.96165	2.01389	2.31062	2.22528	2.23078	3.34885	2.16008	1.85429	2.31882	2.21518	2.03248	2.38994	2.75699	1.59821	2.15328	2.56328	2.55611	0.383325	-0.0655277
ENSG00000272674	PCDHB16	135	80	97	113	156	137	134	149	74	133	58	94	93	138	125	201	84	82	147	230	0.700917	0.405293	0.435137	0.565563	0.742493	0.710874	0.609928	0.650113	0.390687	0.526496	0.262983	0.491284	0.507421	0.708136	0.58517	1.08727	0.486081	0.402352	0.769822	1.05657	0.70643	0.0774116
ENSG00000232434	AJM1	427	392	516	493	389	408	374	568	302	421	545	340	381	324	417	636	300	388	376	402	2.46931	2.2887	2.6429	2.812	2.10902	2.411	1.94439	2.6668	1.8218	1.90096	2.81704	2.02549	2.38777	1.89763	2.22775	3.93379	1.97962	2.18939	2.25048	2.10376	0.99929	0.000119543
ENSG00000174705	SH3PXD2B	683	483	470	491	498	472	518	536	713	761	459	439	26	540	444	475	29	554	746	480	2.22794	1.84144	2.06883	1.92268	2.11707	2.88658	2.56021	1.66919	3.24645	1.94132	1.33377	1.60553	1.18931	2.31815	1.71326	1.65464	1.63131	2.04254	2.5165	1.41668	0.235074	-0.41325
ENSG00000117691	NENF	2393	2369	1451	1766	1622	1289	2509	1995	1704	4457	2063	1899	1374	3070	1853	1607	1753	3049	1936	2081	63.977	63.9759	34.3755	46.5808	40.7399	35.2499	60.3034	43.3129	47.6702	93.2136	49.2981	52.3255	39.8499	83.1938	45.826	45.948	53.6107	79.6149	53.5461	50.4004	0.770159	0.0487326
ENSG00000113532	ST8SIA4	252	218	379	308	420	352	140	209	304	385	208	367	286	187	288	294	186	272	197	406	1.01296	0.940557	1.37403	1.24609	1.59969	1.4456	0.505769	0.680617	1.3288	1.26836	0.746652	1.55469	1.2624	0.774972	1.07124	1.26877	0.865834	1.08715	0.839832	1.5186	0.638795	-0.0887666
ENSG00000117697	NSL1	881	922	841	771	940	891	895	936	902	1193	788	847	684	1018	761	788	657	926	755	912	10.4833	10.6465	8.53091	8.92738	10.0738	10.5634	9.26898	8.8994	11.0697	10.9762	8.07004	10.2433	8.49832	12.0853	7.9085	10.1456	8.82935	10.6502	9.32037	9.7043	0.167499	-0.101313
ENSG00000145536	ADAMTS16	64	25	49	34	26	23	38	45	102	84	23	33	47	81	32	42	6	63	149	57	0.341129	0.124152	0.2192	0.169272	0.125362	0.125694	0.169991	0.18219	0.541728	0.355991	0.104516	0.169979	0.255754	0.435297	0.146821	0.236473	0.034976	0.310474	0.803158	0.274602	0.599968	0.188412
ENSG00000086544	ITPKC	552	461	579	488	427	420	439	660	614	818	490	451	386	506	360	519	265	453	509	436	4.13251	3.47975	3.84412	3.60554	3.00502	3.21643	2.95163	4.01431	4.81159	4.79235	3.27865	3.49344	3.13402	3.84275	2.49056	4.15409	2.27036	3.31103	3.93691	2.95708	0.00299674	-0.237238
ENSG00000076067	RBMS2	2023	1674	2075	2167	2438	1923	1728	2404	2135	2121	1826	1631	1797	1853	1943	2232	1342	1590	1998	1911	6.15005	5.14628	5.65865	6.56806	6.93458	5.98359	4.77519	5.93589	6.79314	5.07835	5.109	5.09042	5.98351	5.69192	5.46874	7.78335	4.69479	4.73171	6.27017	5.25331	0.139071	-0.127813
ENSG00000167283	ATP5MG	7994	8907	7389	8534	8423	7324	10494	8833	6911	14003	9184	7538	8091	9432	8388	4730	9079	9382	7103	6302	129.841	145.52	106.292	137.185	128.678	121.214	153.869	116.218	117.103	178.722	133.769	125.411	142.779	155.309	126.799	82.0293	169.89	148.773	120.489	92.741	0.761071	-0.0464405
NewGene_4401	NewGene_4401	148410	194778	274162	230362	283543	261484	295405	294955	148857	193494	268373	172691	190400	167520	284184	132868	267195	144209	173209	155809	1085.4	1438.96	4119.62	4660.77	1948.37	1955.68	5472.91	4748.25	1173.91	1135.45	1753.94	1301.57	1564.44	3290.15	5653.95	1039.05	3685.46	1029.99	3149.87	1032.16	0.482954	-0.147138
ENSG00000156427	FGF18	309	275	15	31	52	63	75	31	59	187	34	95	31	282	55	162	58	301	264	359	3.94171	3.54049	0.168661	0.382432	0.615034	0.821877	0.850899	0.316868	0.783796	1.86369	0.384286	1.2406	0.418121	3.64052	0.644587	2.20268	0.837985	3.75468	3.48707	4.14686	0.254257	0.572101
ENSG00000012779	ALOX5	246	113	66	41	121	68	91	86	136	268	68	80	35	201	49	188	87	147	73	158	2.48192	1.14578	0.60064	0.411894	1.14118	0.710425	0.854755	0.716716	1.44423	2.13069	0.607222	0.829201	0.385229	2.05836	0.458926	2.03088	0.999125	1.47129	0.757033	1.44178	0.744424	-0.1033
NewGene_6925	NewGene_6925	200	185	154	157	130	120	158	141	104	190	126	194	131	191	102	141	126	231	159	203	2.15327	1.77999	1.22504	1.43852	1.1494	1.11616	1.36749	1.10524	1.13445	1.43281	1.29139	1.81648	1.29657	1.78873	0.998055	1.39255	1.3422	2.44589	1.47403	1.85081	0.41264	0.121707
ENSG00000107338	SHB	621	488	827	713	669	557	553	743	476	554	604	699	463	551	481	806	349	622	658	948	5.65523	4.48899	6.67662	6.41143	5.72952	5.19218	4.52871	5.49533	4.53584	3.94875	4.91437	6.56403	4.57573	5.08879	4.05752	7.85418	3.63677	5.53191	6.20513	7.82976	0.830738	0.0267924
ENSG00000176834	VSIG10	721	721	930	799	717	712	652	906	800	824	817	811	734	849	710	947	581	795	914	1110	3.69463	3.73302	4.22442	4.04665	3.45376	3.73293	3.00518	3.77299	4.30241	3.30331	3.74382	4.28717	4.08542	4.41348	3.36998	5.19245	3.4072	3.98279	4.85162	5.15786	0.0259067	0.145105
ENSG00000181625	SLX1B	300	211	311	324	234	150	315	411	245	351	219	304	254	325	337	322	227	275	309	420	6.67297	4.8211	6.34071	7.24999	4.87972	3.42772	6.51569	7.58132	5.94844	6.21321	4.48959	7.19072	6.08969	7.45237	7.0758	8.01503	5.84272	6.16136	7.07155	8.52523	0.220198	0.147282
ENSG00000134697	GNL2	758	668	692	695	607	622	716	783	781	883	807	742	611	739	716	767	497	812	738	816	8.24961	7.33364	6.6591	7.4474	6.19308	6.91108	6.99552	6.91363	9.00469	7.51917	7.83771	8.49182	7.20454	8.1413	7.26183	8.90297	6.17481	8.61643	8.29658	8.08577	0.105303	0.0770031
ENSG00000168743	NPNT	266	311	570	555	387	484	344	643	796	715	404	402	514	328	870	669	195	247	612	730	1.58037	1.74088	2.80408	3.03872	2.07789	2.9588	1.70253	3.05454	4.62199	3.3178	1.99104	2.34236	3.1359	1.93374	4.6631	3.9864	1.37204	1.4688	3.51602	3.66048	0.872298	0.0354513
ENSG00000134698	AGO4	1600	1412	1830	1389	1383	1353	1613	2051	1575	1803	1592	1512	1380	1388	1681	2016	1006	1374	1517	1752	5.70466	5.08498	5.78207	4.88404	4.63223	4.93244	5.16887	5.93843	5.87509	5.0287	5.07216	5.55654	5.33828	5.01673	5.54643	7.68598	4.10253	4.78232	5.5943	5.65712	0.937513	-0.00532828
ENSG00000108861	DUSP3	6102	6574	9144	6892	6741	5937	6466	8333	7094	7157	6110	6107	6900	6141	6743	7515	4797	6649	6115	8270	40.4643	44.5815	51.2153	42.9975	40.5649	38.2589	36.6889	42.398	46.7835	35.1147	34.5924	39.4843	47.0357	39.4646	39.6453	49.9392	34.7633	40.9705	39.8083	48.1428	0.582934	-0.0420295
ENSG00000143891	GALM	583	507	525	444	409	436	461	434	461	596	370	433	380	494	437	449	282	447	471	617	6.01963	5.24811	4.75273	4.468	3.98202	4.54498	4.26265	3.59291	4.91991	4.76261	3.39983	4.57796	4.23507	5.18679	4.14553	4.90214	3.37608	4.50201	4.97213	5.79169	0.228322	-0.0931642
ENSG00000071246	VASH1	1751	1255	2066	2078	1325	1151	1320	1498	1458	1512	1207	1089	1246	1573	1291	1957	938	1555	1564	1670	7.76393	5.64958	8.19385	9.24129	5.5638	5.30123	5.29586	5.43466	6.78713	5.24569	4.78875	4.96822	6.00261	7.09031	5.35525	9.31713	4.78514	6.85987	7.28536	6.76968	0.502855	-0.0786742
ENSG00000071242	RPS6KA2	2309	2109	2755	2522	2508	2241	2278	3136	2839	2553	2334	2056	2342	1738	2434	2471	1478	1973	3037	3194	10.048	9.27582	10.637	10.8661	10.2938	9.98409	8.97498	11.2132	13.0436	8.72289	9.11586	9.2759	11.1071	7.67427	9.8358	11.7186	7.36246	8.42151	13.7201	12.7359	0.419437	-0.0749992
ENSG00000071243	ING3	461	437	431	511	522	454	425	539	600	632	512	611	404	532	521	379	497	518	481	621	4.32643	3.56444	3.33839	5.34303	4.12041	4.39729	3.40369	3.78833	6.07783	4.73052	3.94984	5.69564	3.74713	5.3033	3.86595	3.44735	5.35561	4.61829	4.39201	4.83265	0.320451	0.101781
NewGene_8404	NewGene_8404	203	210	262	213	292	283	424	392	114	137	206	401	320	253	451	214	193	314	233	348	3.01366	3.39805	3.34705	3.64086	4.34215	5.28028	6.17175	3.90372	1.72669	1.79014	2.49491	5.95226	5.7692	4.09235	6.29267	3.89387	2.98715	5.38461	3.90761	4.1655	0.264743	0.260471
NewGene_8405	NewGene_8405	82	72	220	204	206	194	167	184	226	247	181	228	346	170	546	220	152	311	172	268	0.259102	0.230382	0.618815	0.638991	0.6901	0.664011	0.610597	0.473234	0.800115	0.771781	0.513068	0.772562	1.20205	0.594449	1.72394	0.776663	0.551432	0.963715	0.591809	0.769124	0.0124855	0.612792
NewGene_8407	NewGene_8407	73	26	267	193	340	370	190	260	156	238	204	89	306	54	63	59	44	274	268	125	1.27313	0.484005	4.28842	3.33042	5.68469	6.52904	3.21792	3.74973	2.93034	3.41356	3.10108	1.57603	5.97772	1.02419	0.961874	1.08339	0.933822	4.8167	4.81853	2.89403	0.265052	-0.456422
ENSG00000102401	ARMCX3	2826	2705	3682	2979	2839	2828	2668	3376	3524	4476	3014	2954	2936	2976	2796	3148	2083	3139	3316	4165	20.8305	20.7269	25.7501	22.5056	20.9702	22.008	19.2112	21.0586	31.1277	24.6194	20.0536	22.2186	24.8951	21.628	18.3963	27.0812	17.9774	24.211	26.9578	29.3989	0.879684	0.008043
ENSG00000105926	MPP6	217	243	267	237	270	227	216	261	324	266	315	221	224	187	189	298	212	278	272	425	0.649501	0.734623	0.711985	0.70015	0.760257	0.720677	0.642722	0.636304	1.01552	0.624443	0.840829	0.690468	0.751387	0.567755	0.524354	0.954347	0.739143	0.82716	0.843076	1.21499	0.36701	0.106835
ENSG00000105928	GSDME	358	341	203	156	242	216	209	304	420	608	193	231	183	276	178	232	247	317	284	280	4.005	3.72723	2.00293	1.65179	2.45278	2.17171	2.09944	2.90174	4.9506	5.42279	1.93741	2.57153	2.0953	3.32649	1.85015	2.74603	2.92977	3.29883	3.20496	2.82944	0.20958	-0.219732
ENSG00000132669	RIN2	1319	1263	1295	1266	1312	1341	1205	1604	1415	1890	1300	1414	1319	1454	1330	1571	841	1287	1353	1686	7.45113	7.17945	6.45672	7.02961	6.93703	7.71638	6.09763	7.33106	8.32913	8.32269	6.53823	8.1968	8.05181	8.2965	6.92797	9.45842	5.41215	7.07258	7.8746	8.59647	0.574681	0.0293404
ENSG00000132664	POLR3F	611	543	632	590	565	574	532	638	585	772	693	581	516	595	621	591	455	594	674	632	6.41177	5.76089	5.87984	6.10755	5.56751	6.15913	5.01896	5.43516	6.42601	6.33501	6.50195	6.28779	5.88142	6.33134	6.03268	6.62702	5.46418	6.0876	7.3205	6.00924	0.390159	0.0512697
ENSG00000132661	NXT1	275	272	170	288	273	248	273	264	316	613	268	224	184	387	267	229	180	373	341	257	6.207	6.19599	3.39743	6.41644	5.77993	5.71097	5.53144	4.83867	7.45425	10.8217	5.41083	5.2046	4.49646	8.86315	5.56852	5.51938	4.64384	8.21862	7.96406	5.24425	0.736039	-0.0529845
ENSG00000119596	YLPM1	1117	1108	1381	1343	1125	1140	1244	1513	1206	1377	1093	1181	991	1012	1108	1545	733	1180	1183	1383	5.30987	4.93627	5.17636	5.7781	4.86152	4.86914	4.8835	4.97701	5.33644	4.91458	4.73284	5.68466	4.68041	4.86311	4.53547	7.38432	3.74384	4.90513	5.0953	6.00551	0.24467	-0.0814533
ENSG00000119630	PGF	406	269	400	453	335	293	462	508	699	967	455	246	293	231	249	177	347	351	374	341	6.1474	3.86323	5.13117	6.44848	4.64991	4.39877	5.86506	6.13536	10.9442	10.9223	5.73446	3.60847	4.66911	3.45576	3.23165	2.77884	5.81088	5.1378	5.42052	4.53732	0.00907694	-0.502443
ENSG00000119599	DCAF4	272	262	295	186	212	173	338	459	336	360	229	283	247	258	241	308	170	174	289	314	3.0644	3.03336	2.9648	2.03047	2.27836	1.99222	3.49287	4.29332	3.91669	3.29206	2.30551	3.32511	3.06248	3.0226	2.49418	3.45308	2.003	1.93248	3.36581	3.14169	0.353461	-0.117369
ENSG00000139679	LPAR6	1029	1027	1270	1260	1481	1335	1116	1212	1577	2138	1497	1408	912	1666	1032	1132	976	1396	1022	1703	8.69078	12.0918	9.50098	10.5003	11.7533	12.4822	8.47356	8.31047	13.936	14.124	11.2942	15.747	8.46037	14.3561	8.06002	10.2236	9.42904	11.5124	12.1221	13.0309	0.973992	-0.00382829
ENSG00000148841	ITPRIP	516	473	957	798	640	557	457	672	862	738	472	458	554	390	619	653	356	414	639	730	2.12624	2.57542	4.25443	4.03576	3.17362	3.05619	2.26591	2.87291	4.77028	3.10528	1.57252	2.54266	3.28147	1.99132	3.24343	3.80405	2.24214	2.31874	3.76513	3.68227	0.0484611	-0.273028
ENSG00000148840	PPRC1	552	431	525	449	432	366	479	718	579	632	432	485	378	435	525	620	252	403	575	526	4.46399	3.02862	2.3357	2.35312	2.03197	1.93628	2.37375	3.03738	3.1891	2.45354	3.36802	2.60967	2.26677	2.30614	2.517	4.14902	1.6283	2.07111	5.08168	2.59786	0.333833	-0.0884609
ENSG00000148843	PDCD11	546	474	689	637	422	450	505	654	582	611	539	548	459	500	580	802	249	512	736	650	2.14477	1.90436	2.42887	2.46722	1.55405	1.80512	1.78181	2.0837	2.40663	1.87221	1.89113	2.21499	1.95567	1.98988	2.10292	3.36129	1.11214	1.96298	2.98769	2.30933	0.660537	0.0492522
ENSG00000148842	CNNM2	609	550	2147	531	546	1785	550	1181	1737	598	545	744	555	510	1946	2171	297	2310	614	2718	0.974398	0.93443	3.0441	0.905394	0.852821	2.92075	0.789876	1.56195	2.92368	0.747658	0.778338	1.22953	0.962325	0.849696	2.88676	3.71378	0.54825	3.60989	1.01549	3.9395	0.518088	0.26475
ENSG00000148848	ADAM12	87	50	39	49	33	25	55	40	78	122	51	29	64	65	59	135	28	59	231	99	0.278055	0.160955	0.109799	0.171305	0.097263	0.079251	0.155378	0.101641	0.260853	0.303019	0.144654	0.093702	0.218609	0.207555	0.171819	0.461132	0.101403	0.187396	0.772802	0.284119	0.073744	0.5689
ENSG00000139675	HNRNPA1L2	255	225	172	213	162	135	166	200	271	348	188	248	170	260	184	208	137	197	271	311	4.70953	4.18748	2.81768	3.87221	2.80735	2.53744	2.75734	3.00091	5.24297	5.02361	3.10389	4.72001	3.39604	4.86576	3.14112	4.09706	2.88753	3.55325	5.17592	5.19592	0.459853	0.0907376
ENSG00000162627	SNX7	1109	1085	852	850	1016	910	1423	1333	1401	1968	1226	1021	984	1364	1229	915	907	1274	1098	1247	16.3373	16.0859	11.0694	12.3976	14.0426	13.6528	18.7959	15.8788	21.559	22.707	16.0825	15.4624	15.6765	20.4305	16.7202	14.4614	15.2668	18.3435	16.7508	16.6012	0.900392	0.0135769
ENSG00000162623	TYW3	901	988	826	712	841	830	903	1075	1133	1310	863	909	723	1141	804	986	721	962	893	1001	6.66427	7.38666	5.43384	5.24112	5.83983	6.28558	6.00564	6.46157	8.87152	7.57822	5.71062	6.92324	5.81178	8.55427	5.50657	7.7973	6.10786	6.94127	6.83661	6.70205	0.990619	-0.000860516
ENSG00000188706	ZDHHC9	774	734	817	729	763	752	1116	1273	1061	1231	629	817	715	722	728	673	628	681	865	688	4.33823	4.23502	4.03762	4.01173	4.00081	4.26754	5.56782	5.75167	6.24865	5.3623	3.12129	4.67762	4.50267	4.10178	3.81748	3.99324	4.00676	3.68928	4.96637	3.51141	0.00630061	-0.273384
ENSG00000188707	ZBED6CL	119	73	53	68	51	56	83	108	86	109	62	68	17	52	90	89	42	48	129	94	1.02146	0.632039	0.401759	0.580397	0.411521	0.486726	0.642733	0.757888	0.777802	0.733705	0.478664	0.602489	0.156989	0.450125	0.713777	0.821024	0.409153	0.401601	1.15383	0.733371	0.476512	-0.165392
ENSG00000185634	SHC4	106	88	76	119	111	148	83	132	195	135	78	48	35	82	63	116	38	63	127	81	0.588031	0.491858	0.417079	0.651587	0.61302	0.857959	0.42467	0.616539	1.16867	0.625152	0.386658	0.271557	0.205706	0.483753	0.31994	0.701356	0.24053	0.338136	0.761116	0.403963	0.00123404	-0.670528
ENSG00000165071	TMEM71	179	160	74	89	104	75	140	172	122	266	80	114	58	214	90	182	137	211	88	241	2.51061	2.16765	0.818742	1.11325	1.2859	0.976272	1.59688	1.80512	1.60852	2.818	0.907986	1.55333	0.874241	2.76465	1.05327	2.48218	2.14769	2.69116	1.1481	2.83617	0.607867	0.125346
ENSG00000185630	PBX1	2179	2073	2401	2042	2468	2457	2381	2634	2521	3210	1876	2208	1960	2271	2262	2297	1408	2138	2591	2833	8.86141	8.18962	8.26717	7.91364	9.31313	9.80832	8.82438	8.40828	10.5329	9.90938	6.54052	9.10305	8.77046	9.50057	8.22904	9.78995	6.28048	8.2639	10.4513	10.4826	0.106786	-0.0963833
ENSG00000185633	NDUFA4L2	1306	1278	1812	1826	2061	1700	1537	2193	1660	1987	1761	1245	1187	1181	1667	1447	1217	1157	1421	1669	31.3337	31.0168	34.5458	42.1518	47.9556	41.4998	29.8129	41.8595	43.7411	37.7345	39.9871	27.6291	31.2083	25.9025	36.577	37.7866	33.9283	24.3384	35.6969	35.9432	0.0303184	-0.241919
ENSG00000165072	MAMDC2	1252	1078	978	861	1373	1256	1079	1367	1531	1598	800	1149	867	2121	1181	2296	722	1212	978	1363	8.78345	7.64046	6.08027	5.96123	9.04775	9.01318	6.8025	7.79132	11.2414	8.77023	5.0115	8.3075	6.60179	15.0847	7.66233	17.2236	5.78798	8.30515	7.09746	8.65974	0.597088	0.0865258
ENSG00000101353	MROH8	179	149	172	176	161	114	189	175	208	230	188	214	166	193	198	171	144	173	177	268	2.11326	1.40889	1.58102	1.39811	1.38501	1.00187	1.46883	1.58391	1.74394	2.11904	2.00392	1.75885	1.40441	1.80996	2.0677	1.64288	1.36663	2.06964	2.26299	2.29198	0.0375087	0.183996
ENSG00000169902	TPST1	730	645	425	501	478	308	744	678	679	1172	449	510	445	805	469	505	417	727	666	661	8.74906	7.80455	4.51237	5.92058	5.3847	3.77037	8.00993	6.68203	8.51054	10.9929	4.80762	6.29635	5.78087	9.779	5.19815	6.47523	5.7162	8.52919	8.25604	7.18031	0.628476	-0.0724524
ENSG00000169905	TOR1AIP2	955	799	1018	933	1029	852	1004	1029	1018	1484	857	1095	858	952	879	1049	610	1044	1147	1170	3.23137	2.76263	3.09498	3.20789	3.3663	2.9529	3.06964	2.97495	3.72412	3.95404	2.64022	3.9895	3.15649	3.27645	2.75494	4.01933	2.41974	3.62701	4.02724	3.58222	0.971334	0.00222381
ENSG00000169908	TM4SF1	3175	3195	4074	4521	5346	4607	3234	4059	4124	4705	4117	4078	3247	3742	4178	4545	2620	3693	3520	5464	46.2526	46.7763	51.8758	67.756	73.5326	69.0865	42.899	46.8047	61.9041	53.1487	52.481	59.3308	51.8727	55.0023	54.7148	69.1065	43.7558	52.2778	51.5552	70.7976	0.839924	-0.0220742
ENSG00000089902	RCOR1	672	648	962	855	767	723	902	1093	901	965	926	884	759	634	771	921	407	768	932	1015	2.96134	2.885	3.75769	3.71767	3.17527	3.26006	3.57176	3.91339	4.15752	3.32679	3.6494	4.01568	3.63162	2.83006	3.14294	4.33891	2.0493	3.30599	4.25051	4.05427	0.794723	-0.0247762
ENSG00000180287	PLD5	63	106	77	40	100	61	88	72	105	103	31	56	41	76	73	61	50	84	34	86	0.208996	0.335382	0.196014	0.136096	0.364878	0.190731	0.238168	0.169117	0.330104	0.232963	0.080595	0.167799	0.127321	0.222838	0.196204	0.189039	0.164428	0.295102	0.101951	0.225908	0.0566578	-0.394542
ENSG00000112619	PRPH2	642	622	1559	1122	774	808	1249	1674	826	733	1186	888	1446	774	823	701	702	770	717	523	5.46677	5.35773	11.7801	9.4334	6.20077	7.04041	9.56868	11.5915	7.36569	4.88479	9.03289	7.80133	13.3764	6.68851	6.49097	6.38952	6.83911	6.40955	6.32627	4.03803	0.574994	-0.122728
ENSG00000152894	PTPRK	652	756	1409	1182	1161	957	802	1086	1269	952	1098	764	1055	559	1034	998	458	656	792	1043	3.22563	3.3562	5.47547	4.97685	4.73818	4.16593	3.12397	3.76941	5.91904	3.45862	4.68718	3.45519	5.04761	2.4508	4.12841	4.56916	2.23422	2.69405	3.50099	4.04551	0.178419	-0.218626
ENSG00000138780	GSTCD	303	428	434	297	433	176	290	394	528	472	433	490	357	346	425	513	163	354	503	515	1.79707	2.56237	2.28213	1.7958	2.46055	2.16603	1.67531	1.9388	3.48914	2.19541	2.36311	3.00282	2.30241	2.07337	2.34558	3.39777	1.09969	2.09702	3.15136	2.76905	0.231199	0.183346
ENSG00000138785	INTS12	654	648	710	628	644	665	702	735	738	878	626	659	699	745	641	591	534	680	574	814	9.87034	9.17636	8.75657	8.89898	8.93897	10.0748	9.26785	8.68787	11.1326	9.89066	8.37587	10.0666	10.5308	10.6789	7.89794	8.87693	8.91695	9.07966	8.77228	11.0426	0.80977	-0.0167436
ENSG00000014164	ZC3H3	393	321	505	435	338	306	378	468	345	432	408	321	361	344	375	448	250	363	340	475	3.03932	2.50657	3.46244	3.31777	2.45697	2.4157	2.62317	2.93459	2.79086	2.61415	2.87336	2.59094	3.06931	2.69556	2.68447	3.70428	2.37375	2.73597	2.71631	3.32698	0.782909	-0.0241349
ENSG00000154803	FLCN	2645	2418	2734	2334	2032	2070	2686	3773	2263	2100	2181	2691	2637	2333	3030	3218	1939	2251	2913	2376	19.8059	18.6227	18.0373	17.5909	14.0796	15.8459	18.4036	22.9417	18.2186	12.0077	14.5003	21.5509	21.1602	18.2739	21.1507	26.8008	16.9848	17.3644	22.9312	15.63	0.365235	0.102749
ENSG00000196792	STRN3	1606	1547	2383	1814	1954	1790	1737	2046	2077	2128	1840	1875	1902	1536	2020	1925	1182	1680	1739	2100	10.3493	10.1328	13.7709	11.6318	11.9089	11.8155	10.0225	10.7978	14.0112	10.7428	10.7654	12.4208	13.2138	10.3402	11.9896	13.6362	8.65485	10.5427	11.6116	12.3467	0.680557	-0.0337145
ENSG00000196793	ZNF239	114	88	127	66	65	51	90	105	89	157	77	87	74	100	68	115	58	82	71	125	1.38473	1.16546	1.49796	0.753474	0.64862	0.661527	1.0583	1.12779	1.23321	1.40627	0.724229	0.949143	0.839235	1.06656	0.833734	1.29771	0.703105	1.05334	0.778705	1.40301	0.635066	-0.0681408
ENSG00000164305	CASP3	523	471	664	563	524	528	515	558	740	1147	566	684	535	651	539	594	354	525	540	809	5.04482	4.62824	5.85661	5.56427	4.77642	5.23834	4.61808	4.35494	7.59891	8.92582	4.88183	6.77527	5.78742	6.33129	4.87542	6.34971	3.88887	5.10414	5.39812	7.14396	0.830971	-0.021561
ENSG00000164306	PRIMPOL	372	409	357	348	364	314	275	340	411	638	344	325	361	374	386	334	334	441	375	413	4.18313	4.77019	3.69975	4.02877	3.93549	3.78612	2.88624	3.19317	4.98227	5.64819	3.47439	3.89231	4.56958	4.52576	4.03892	4.19733	4.45741	5.0393	4.4675	4.25562	0.691198	0.0405659
ENSG00000164307	ERAP1	1562	1368	1239	927	1447	1216	1058	1305	1988	1944	1421	1211	1077	1489	1142	2039	971	1118	1657	2190	7.73398	6.86021	5.58835	4.67199	6.91383	6.31501	4.82132	5.37369	10.6608	7.78473	6.50936	6.31938	5.70535	7.66416	5.23904	11.162	5.69959	5.5502	8.74291	10.1782	0.493246	0.0830622
ENSG00000164300	SERINC5	323	306	369	347	433	397	390	441	547	482	319	335	347	370	353	517	256	337	384	470	1.26304	1.21021	1.2778	1.33847	1.60672	1.58718	1.37191	1.40212	2.24088	1.47364	1.11527	1.3632	1.47364	1.48101	1.2858	2.18769	1.14588	1.28353	1.55392	1.66736	0.484372	-0.0676597
ENSG00000164303	ENPP6	3479	2693	685	565	998	822	1986	1442	1812	3802	674	1644	751	4763	806	2262	1017	2836	5048	2583	22.427	17.5366	3.91369	3.59144	6.05765	5.41665	11.5426	7.55001	12.22	19.2161	3.88114	10.943	5.24937	31.2189	4.80256	15.5924	7.49763	17.856	33.6757	15.0853	0.385209	0.353817
ENSG00000164308	ERAP2	523	883	1167	1017	1867	1943	1562	1920	178	257	123	912	149	220	1647	250	751	1142	180	186	4.13478	4.42427	4.70716	4.87282	7.88653	8.83375	6.2629	6.93381	0.975347	0.916951	0.572925	4.72089	0.741364	0.996744	7.09185	1.42026	3.92926	5.52685	0.837693	0.750775	0.0854846	-0.952224
ENSG00000100401	RANGAP1	954	674	1149	1094	796	632	977	1126	1031	1228	996	806	784	792	953	1193	490	793	1001	1173	6.91799	5.39445	8.05898	8.12706	5.75206	4.8861	6.77761	7.14343	8.11672	7.73724	7.2339	5.99136	6.05302	5.90314	6.90764	9.85009	4.3709	5.58961	7.63412	8.34966	0.673799	-0.0416102
ENSG00000100403	ZC3H7B	2427	1937	2412	2419	2067	1549	2244	2904	2544	3095	1782	1778	1810	2186	1890	2666	1420	2351	2659	2451	10.4223	8.40007	9.17915	10.247	8.33923	6.80275	8.66098	10.1275	11.43	10.3955	6.8383	7.86698	8.43435	9.51333	7.50942	12.2391	6.97173	9.85686	11.8128	9.53401	0.204535	-0.095935
ENSG00000104381	GDAP1	286	361	467	304	356	336	363	416	395	428	434	297	329	369	342	274	235	318	394	435	1.97384	2.52204	2.88339	2.07568	2.31044	2.37623	2.27788	2.33321	2.85706	2.33053	3.13938	2.16055	2.46738	2.61036	2.19009	2.02246	1.85671	2.14446	2.81943	2.74586	0.61783	-0.0478518
ENSG00000104388	RAB2A	4828	5017	5702	4638	5788	5588	5034	5797	5861	7590	6228	5437	5589	6232	5793	5888	4214	6025	5221	6944	31.9483	33.5064	33.3735	30.3119	35.9568	37.7389	30.0631	31.0498	40.5246	39.1914	36.7375	37.0549	40.1413	41.7345	35.3518	41.5176	31.816	38.9393	35.6284	41.535	0.0610474	0.116778
ENSG00000125430	HS3ST3B1	512	526	727	533	707	674	546	749	621	597	825	732	591	420	746	611	342	558	681	577	3.357	2.64677	3.49181	2.85125	3.46375	4.13406	2.53145	3.06043	3.4274	2.56927	3.74534	4.27838	3.42583	2.16627	3.5652	3.41621	2.06551	2.83631	3.81344	2.62861	0.810685	0.0320225
ENSG00000125434	SLC25A35	209	186	262	273	257	232	266	253	195	458	226	250	175	191	240	319	149	235	230	343	2.34048	2.10603	2.59985	2.9445	2.68648	2.93284	2.75005	2.69466	2.65464	3.79507	2.5857	2.89633	2.12288	2.26107	2.42662	3.83622	2.06032	2.87295	3.05106	3.55514	0.562916	-0.069107
ENSG00000182628	SKA2	1060	926	983	1032	1000	1003	1018	1156	960	1519	1006	1113	788	1023	1066	855	846	1168	1070	1233	11.0456	9.96323	9.31376	10.2709	9.7418	10.7309	9.52679	9.88351	10.8977	12.4692	9.48889	12.0053	8.4774	10.955	10.102	9.27255	10.1589	12.0065	11.3569	11.1867	0.889869	0.0100721
ENSG00000182621	PLCB1	385	298	372	369	454	430	373	466	452	395	384	468	377	415	250	401	216	394	328	482	1.62662	1.15539	1.32272	1.40679	1.61302	1.83513	1.48106	1.408	1.73833	1.17083	1.32961	1.93029	1.61664	1.70997	1.43522	1.71303	0.941878	1.467	1.36114	1.80386	0.630864	-0.0554972
ENSG00000254852	NPIPA2	47	56	48	22	44	59	49	107	47	104	59	46	21	39	51	69	61	55	72	94	1.11321	1.43258	1.05868	0.46973	1.00549	1.50324	1.04778	2.14509	1.17163	2.03611	1.34011	1.16089	0.542765	0.935329	1.13131	1.89318	1.74097	1.32463	1.78805	2.08703	0.811446	0.0559192
ENSG00000007402	CACNA2D2	210	179	213	168	211	188	237	314	186	234	169	176	138	139	175	248	105	167	232	282	0.988217	0.846539	0.884299	0.773853	0.930683	0.908632	1.01598	1.22698	0.911218	0.871547	0.686655	0.859339	0.696234	0.669101	0.74601	1.25483	0.57035	0.768652	1.14014	1.2019	0.136574	-0.175819
ENSG00000254858	MPV17L2	491	360	502	548	688	679	581	651	447	542	564	442	416	301	482	337	387	539	322	526	8.84093	6.54136	8.00377	9.74118	11.6362	12.5046	9.40452	9.52741	8.41146	7.63813	9.06805	8.19666	8.13062	5.48732	8.02868	6.47741	7.97281	9.47284	6.00128	8.57939	0.0755596	-0.281258
ENSG00000104967	NOVA2	272	196	320	335	321	299	233	318	300	180	237	242	230	120	283	330	155	132	241	349	1.15572	0.769974	0.921284	1.07238	1.00936	0.99132	0.707408	0.838938	1.02075	0.498413	0.796102	1.06058	0.810438	0.61827	0.88806	1.16737	0.611039	0.442351	1.04561	1.109	0.22911	-0.224676
ENSG00000104964	AES	18668	16888	17461	16873	16053	14676	17571	19168	14761	26088	18936	16845	13395	18945	15731	17218	11947	18427	15748	20009	290.05	260.283	235.998	258.759	230.491	225.264	246.981	241.13	238.357	315.199	258.654	263.31	226.177	303.15	224.71	287.723	209.782	277.903	251.34	277.203	0.766476	-0.0180228
ENSG00000104960	PTOV1	3905	3500	4266	3518	3636	3390	3591	4578	3168	4895	4129	4153	3166	3591	3672	4175	2711	3479	3789	4589	57.9659	52.287	55.3044	52.6637	53.0403	50.9504	46.4391	53.3456	48.9417	57.1528	56.2244	62.8154	51.9763	54.5952	49.8202	64.7694	45.7793	50.1722	57.9734	59.8447	0.575318	0.0315274
ENSG00000054523	KIF1B	10404	10881	16545	11223	11118	10951	10815	14962	13007	10513	12015	13052	12483	8038	12020	14337	8396	10639	9753	12741	33.7502	35.8442	48.0322	36.2914	34.3674	36.8657	31.8605	39.6036	44.4788	27.1644	35.4851	44.0011	44.496	26.7549	36.7031	50.5479	31.4611	34.1511	33.0511	37.6811	0.882054	-0.0169662
ENSG00000239264	TXNDC5	2540	2303	2092	1865	2277	2029	2327	2376	2754	4063	1752	1910	1780	3305	2009	2762	1582	2983	2710	2948	21.7474	19.916	15.8671	15.7469	18.3137	17.7734	17.9071	16.5487	24.6645	27.2091	13.4005	16.8522	16.5306	28.6806	15.9124	25.2811	15.4848	24.9395	23.9999	22.8618	0.855562	0.0193935
ENSG00000106524	ANKMY2	1031	1079	1095	994	974	940	1115	1251	1451	1608	1208	1120	1050	946	1032	957	751	996	1075	1260	10.238	10.8806	9.63427	9.81529	9.13603	9.58297	9.99835	10.0779	15.077	12.6645	10.6955	11.4868	11.3313	9.51671	9.46968	10.2288	8.60306	9.65766	11.2669	11.3284	0.316228	-0.0677058
ENSG00000155868	MED7	373	364	361	321	299	240	329	380	392	556	354	317	258	441	288	256	275	428	347	380	4.1399	3.87567	3.38734	3.60903	3.30131	2.5895	3.38636	3.25279	4.33583	5.15546	3.33921	3.45681	3.08264	5.10818	2.80702	3.43608	3.31573	4.5838	3.8209	3.79288	0.824699	-0.0228612
ENSG00000106526	ACTR3C	50	56	58	45	79	83	79	116	89	70	116	86	78	87	62	89	76	99	33	95	0.859472	1.07227	0.792047	0.78938	1.2845	1.65497	1.06651	1.4758	1.87016	0.516831	2.23394	1.43514	1.29109	1.49101	0.834206	1.34283	1.12075	1.62795	0.420271	1.58947	0.20557	0.260299
ENSG00000008988	RPS20	20928	16779	10923	16240	11624	10524	18585	13887	10333	42773	12205	16174	11388	24441	11250	8508	14470	20628	15672	13158	771.406	604.79	349.702	578.303	344.967	369.163	631.505	405.857	382.286	1249.95	369.676	548.143	442.145	943.623	339.916	319.828	614.439	706.658	573.497	388.117	0.676318	-0.0891148
ENSG00000102218	RP2	460	420	396	360	473	431	334	379	491	609	360	352	382	552	382	419	232	513	416	554	3.06394	2.83024	2.33943	2.3664	2.96245	2.93602	2.00194	2.05163	3.42778	3.17847	2.14393	2.41495	2.7634	3.73182	2.35534	2.98581	1.76917	3.33982	2.86802	3.34787	0.928688	-0.00947748
ENSG00000180917	CMTR2	1061	1033	1628	1149	1194	1204	1066	1335	1611	1780	1465	1328	1256	1151	1236	1208	1123	1051	1182	1405	6.22742	6.37178	9.00926	6.63059	6.7947	7.52374	5.53351	6.63643	9.97189	8.39339	7.46718	8.35908	8.25203	7.15577	6.84876	7.83835	7.89867	6.1367	7.29826	7.59206	0.839377	0.0192235
ENSG00000180914	OXTR	51	50	59	59	30	37	68	63	67	54	69	53	45	33	64	30	48	46	41	98	0.292083	0.291794	0.299875	0.337522	0.163879	0.215043	0.350804	0.295269	0.404071	0.243404	0.358255	0.312595	0.28191	0.192815	0.342018	0.180949	0.314227	0.260787	0.243009	0.514277	0.832198	0.0427652
ENSG00000160551	TAOK1	2148	1940	3361	2675	2618	2457	2651	3219	3671	3012	2405	2370	2360	2028	2441	3167	1553	2302	2661	2971	4.39351	4.02463	6.22018	5.75645	5.0299	5.13922	4.8733	5.34727	7.95081	4.81806	4.39478	4.99482	5.31908	4.2036	4.61929	6.98626	3.6321	4.59804	5.81921	5.50436	0.161595	-0.130456
ENSG00000124479	NDP	278	266	215	144	207	200	318	248	252	318	624	558	232	374	373	484	208	608	409	314	3.98979	3.91452	2.72645	1.96276	2.83296	2.93314	3.95821	2.78566	3.8573	3.43344	8.11139	8.42522	3.63924	5.49501	5.06153	7.18349	3.29072	8.38447	6.21904	4.14496	1.19946e-06	0.837412
ENSG00000012983	MAP4K5	1217	1195	1211	1117	1075	995	1081	1188	1420	1904	971	1252	1065	1596	981	1440	816	1151	1270	1464	7.10818	7.04013	6.26314	6.47818	5.89189	5.92882	5.71127	5.6422	8.67463	8.70839	5.05706	7.52804	6.72956	9.42237	5.28578	9.06618	5.44273	6.61715	7.71044	7.81022	0.730638	0.0271515
ENSG00000152076	CCDC74B	114	73	15	44	46	46	64	98	68	197	57	62	31	114	66	83	26	105	69	81	2.04736	1.33116	0.230015	0.836084	0.717259	0.888519	1.24633	1.43233	1.26001	3.03936	1.0761	1.05702	0.509448	2.36028	0.985297	1.55919	0.540298	1.89389	1.31211	1.51391	0.883396	-0.0435743
ENSG00000172766	NAA16	514	435	557	462	405	434	474	427	591	535	492	520	414	406	480	474	378	439	455	493	3.17117	2.65398	2.98687	2.69103	2.28865	2.63602	2.53381	2.04392	3.76524	2.57191	2.62667	3.2559	2.73642	2.40969	2.6628	3.12087	2.62051	2.56708	2.83556	2.6624	0.872242	-0.0132635
ENSG00000213316	LTC4S	159	84	63	36	77	72	118	85	76	238	48	107	61	211	110	130	55	196	90	134	6.07441	3.2248	2.1234	1.48535	2.74477	2.8056	4.03803	2.75733	3.01626	7.09791	1.64441	4.28685	2.57469	8.19319	3.86774	5.30366	2.41742	7.27503	3.55244	4.74136	0.333018	0.268092
ENSG00000156983	BRPF1	480	402	441	385	390	409	527	515	517	483	348	352	378	392	357	608	244	391	448	541	2.57794	2.22641	2.15138	2.05131	1.97129	2.31883	2.62946	2.2691	2.946	2.08176	1.71028	2.02658	2.27966	2.27497	1.81324	3.61193	1.49902	2.12121	2.53429	2.80855	0.22249	-0.112981
ENSG00000095261	PSMD5	835	743	741	696	929	833	787	892	986	1115	661	756	711	986	860	743	513	1020	977	1104	6.15109	5.64214	5.00805	5.06087	6.4635	6.42332	5.32363	5.39441	7.67602	6.41877	4.34967	5.80627	5.68438	7.41258	5.86202	5.8515	4.42645	7.33535	7.6956	7.36437	0.825283	0.0196369
NewGene_10542	NewGene_10542	1114	875	889	885	316	235	485	594	317	330	1042	1291	263	962	458	925	451	620	1488	1003	10.3034	7.95784	7.9281	7.29278	3.07444	1.81265	4.04628	4.71096	3.26214	2.63044	9.42606	11.2303	2.34334	10.0473	3.30077	10.5454	4.76241	5.91231	13.991	8.61226	0.0853831	0.509458
ENSG00000123297	TSFM	1234	1310	1436	1253	1397	1427	1413	1549	1231	1476	1206	1103	1537	980	1419	913	1100	1184	1170	1496	15.9033	16.8156	16.1433	15.2929	16.1817	19.1054	15.986	15.916	17.0588	14.9196	13.3011	14.8681	20.9731	12.6976	16.459	12.8272	16.6561	16.724	15.3104	17.7363	0.387363	-0.101018
ENSG00000091947	TMEM101	681	532	640	577	583	517	485	618	606	993	727	674	556	728	662	643	424	693	768	787	11.6365	8.68015	9.36211	9.55004	8.48329	8.78345	7.06154	8.06861	10.5319	12.8708	10.3537	11.4686	9.99044	12.0142	10.1766	10.8158	8.3028	10.0268	13.0398	11.9527	0.0143829	0.172165
NewGene_11494	NewGene_11494	56	48	94	51	109	88	65	54	88	84	67	70	100	77	82	53	48	55	72	95	0.370382	0.315624	0.55088	0.330148	0.673698	0.593348	0.382699	0.2866	0.609139	0.434287	0.394065	0.472473	0.715158	0.512468	0.498243	0.373949	0.358332	0.35132	0.492849	0.564359	0.888807	0.0268157
NewGene_9419	NewGene_9419	196	156	31	40	127	170	149	114	81	187	11	86	127	76	126	46	101	62	143	278	3.17286	2.53741	0.44412	0.629565	1.92361	2.8098	2.16363	1.48796	1.36778	2.35864	0.158616	1.42501	2.25322	1.245	1.87333	0.789495	1.86548	0.970583	2.39216	4.07119	0.608405	-0.197589
NewGene_9411	NewGene_9411	327	254	320	240	244	191	238	231	0	0	194	306	2	0	0	0	0	0	320	0	1.24983	1.22506	1.3556	0.877518	0.875722	0.859853	1.04544	0.89018	0	0	0.8522	1.20019	0.007533	0	0	0	0	0	1.32198	0	0.403565	-1.34397
NewGene_3454	NewGene_3454	932	790	469	688	494	444	740	549	495	1669	497	712	529	1284	558	484	717	828	729	655	36.059	30.6027	15.938	26.3028	17.9366	17.5329	25.3485	17.1223	19.7721	50.424	17.0874	28.39	22.0365	50.3904	19.9271	19.8379	31.6068	31.05	29.3871	22.7902	0.742008	0.0688934
ENSG00000047597	XK	457	509	639	458	691	665	436	574	603	538	562	454	468	339	432	513	402	568	418	511	2.22212	2.50483	2.75711	2.19929	3.16293	3.30886	1.90516	2.26849	3.06859	2.04849	2.44572	2.27814	2.47316	1.67186	1.94676	2.66854	2.23723	2.69937	2.10512	2.25314	0.140373	-0.1918
ENSG00000123124	WWP1	2496	2749	2961	2301	2211	2100	2753	3053	2808	3359	1985	2510	2650	2738	2267	2658	1747	2479	2521	3272	13.7108	15.2612	14.7622	12.5338	11.5265	12.0231	13.5814	13.9608	16.2276	14.5798	9.79185	14.6618	15.792	15.6462	11.573	16.4316	11.168	13.3974	14.4564	16.544	0.561239	-0.037194
ENSG00000113140	SPARC	47606	44600	69458	59917	60247	53508	53423	60105	67475	96487	57076	43453	53713	75570	61921	63180	28913	61531	70007	71286	326.646	308.963	422.347	405.452	388.201	375.277	329.38	334.842	484.295	517.57	349.77	307.092	399.791	525.331	393.07	463.454	226.825	412.039	496.691	442.846	0.981567	0.00240881
ENSG00000184113	CLDN5	1687	1491	2288	2431	2118	2180	2151	3176	4183	3686	2960	1632	2286	1271	2567	2083	1342	1291	2425	2166	20.7098	18.7727	27.4979	29.445	26.4228	29.3011	24.0161	37.0693	56.0581	42.5123	40.9387	23.1365	44.1405	22.8518	30.0863	26.7118	26.2334	19.4279	35.7171	27.6094	0.152451	-0.244934
ENSG00000184110	EIF3C	4296	4061	4954	3730	3719	3632	5220	6227	3668	5042	5671	5197	5558	5945	4541	5422	3454	4956	2335	4824	34.9112	33.156	35.7847	30.4999	28.3446	30.5319	37.9011	41.3288	31.5604	31.9243	41.0555	43.3243	49.7347	48.6341	33.9268	47.6543	31.9315	39.6508	19.5119	36.0405	0.167547	0.190335
ENSG00000163239	TDRD10	158	131	137	115	73	72	94	116	79	129	107	113	75	102	140	118	75	123	142	112	1.97152	1.65527	1.47053	1.32774	0.828775	0.959652	1.05944	1.12951	1.04266	1.1889	1.17004	1.48204	1.00856	1.23275	1.6088	1.3733	1.09265	1.48636	1.84129	1.21933	0.632322	0.0711841
ENSG00000168229	PTGDR	70	36	80	41	36	26	32	25	16	34	33	68	34	59	48	73	21	86	54	103	0.59911	0.319132	0.606956	0.334655	0.286422	0.230519	0.243964	0.174951	0.148194	0.223234	0.246925	0.600848	0.31255	0.542412	0.376601	0.68134	0.205135	0.724309	0.477449	0.802438	0.046139	0.559778
ENSG00000168228	ZCCHC4	318	294	390	349	307	314	353	414	394	383	394	398	296	341	274	344	309	303	371	396	3.03614	2.77229	3.23278	3.30543	2.83294	3.02526	3.05364	3.21957	3.95516	2.91404	3.33044	3.92917	3.09306	3.23245	2.36791	3.53218	3.38504	2.99666	3.63839	3.40824	0.646053	0.0386966
ENSG00000162545	CAMK2N1	1530	1354	1549	1304	1575	1588	1792	2023	1334	2242	1831	1502	1472	1414	1725	1231	1296	1692	1089	1545	16.6205	14.857	14.9062	13.9722	16.0756	17.6379	17.4932	17.8459	15.1562	19.05	17.7731	16.8078	17.3467	15.5622	17.3358	14.2968	16.0961	17.9505	12.2359	15.1982	0.687122	-0.0448843
ENSG00000166046	TCP11L2	660	830	899	725	981	918	894	1179	1048	716	735	796	868	634	886	1175	506	941	654	646	9.26597	10.688	9.86047	9.53248	11.1305	11.5055	10.1086	11.8093	13.3937	6.63331	8.28625	10.0672	11.7377	8.32648	10.5185	16.1525	7.13896	11.3717	8.38728	7.25391	0.425438	-0.113709
ENSG00000162542	TMCO4	357	323	313	318	317	281	393	476	434	533	199	318	252	372	342	369	256	281	370	359	3.04154	2.80147	2.36406	2.67487	2.54685	2.4459	3.01034	3.29679	3.86651	3.55601	1.51549	2.79373	2.33037	3.22076	2.69764	3.35878	2.48867	2.33852	3.26546	2.77146	0.0731274	-0.179268
ENSG00000162543	UBXN10	429	492	274	252	266	247	279	381	384	318	416	477	219	301	333	389	156	437	368	327	1.95261	2.26271	1.1025	1.12967	1.13658	1.1477	1.13852	1.40667	1.82694	1.13242	1.69182	2.23599	1.08198	1.38618	1.4018	1.89111	0.812639	1.94085	1.73442	1.34861	0.574782	0.0901319
NewGene_2324	NewGene_2324	1099	1367	1316	1074	2211	1667	1845	2033	2182	2349	1851	1543	1370	1798	1866	1821	1175	2019	1548	1568	4.69028	5.8893	4.9726	4.5602	8.88908	7.24114	7.02739	7.06227	9.76196	7.7904	7.00047	6.7288	6.35521	7.81654	7.35502	8.33496	5.68813	8.41883	6.82213	6.0683	0.832117	0.0277975
NewGene_2329	NewGene_2329	77	74	65	37	52	42	68	65	108	117	74	112	52	65	75	41	33	97	67	88	1.33465	1.48144	1.00675	1.07677	1.01363	0.906008	1.21777	1.11465	2.37169	1.9526	1.37714	2.29594	1.18451	1.31066	1.22722	0.798641	0.760834	1.76993	1.47558	1.60607	0.683177	0.0817692
NewGene_2328	NewGene_2328	43	79	29	27	21	23	53	22	47	96	54	39	76	79	39	42	32	24	45	25	1.34798	1.76266	0.802298	0.695381	0.707884	1.0167	1.09665	0.565964	1.20889	2.36536	1.52343	0.930558	1.7998	2.44276	0.755363	1.25574	0.971089	0.991922	1.47241	0.696526	0.571706	0.173638
ENSG00000254087	LYN	422	239	313	270	372	311	278	280	414	571	273	247	236	345	241	341	162	457	251	404	2.22982	1.08201	1.42274	1.45649	1.76903	1.5298	1.40182	1.25655	2.28285	2.12582	1.07488	1.30924	1.36058	1.7407	1.10458	2.17288	0.807572	2.31049	1.41121	1.88428	0.231585	-0.167163
ENSG00000137776	SLTM	1559	1570	1932	1832	1454	1460	1575	2009	1967	2086	1606	1788	1563	1564	1763	2050	1230	1662	1763	2042	9.53197	9.75238	10.6341	11.333	8.41221	9.49531	8.74893	10.3162	13.6532	10.0371	8.80963	11.3143	11.3601	9.86709	10.1148	13.9702	8.60804	10.067	11.3147	11.4403	0.503104	0.036132
ENSG00000137770	CTDSPL2	916	890	922	823	947	922	877	991	1209	1380	963	1096	896	1039	1060	1003	670	1033	956	1112	3.436	3.33931	3.04647	3.09182	3.30407	3.49927	3.0374	2.98967	4.76717	4.03766	3.20608	4.24424	3.64945	3.97548	3.67068	4.04299	2.91319	3.78355	3.67433	3.80367	0.274679	0.0677237
ENSG00000130204	TOMM40	1056	1128	1212	1211	954	1065	1310	1616	1071	1323	1214	1135	1069	978	1189	1166	807	1008	1114	1268	13.6979	15.3532	13.2836	15.3178	10.3485	13.2843	14.7544	17.0142	13.7054	10.6555	13.8924	14.4397	12.7689	10.4892	14.0215	13.8316	11.8047	10.9136	15.499	15.1076	0.484414	-0.0536625
ENSG00000130202	NECTIN2	1446	1182	1631	1706	1806	1422	1346	2016	1641	1612	1981	1391	1367	1019	1915	1749	840	1069	1537	1818	16.7001	13.7947	17.0523	19.6728	19.7779	16.9601	14.0338	19.1619	20.0565	14.737	20.8092	16.8126	17.1417	12.1778	20.8833	21.8519	11.3309	12.1722	18.5858	19.1316	0.687011	-0.0515193
ENSG00000130203	APOE	176	168	127	138	215	172	254	143	136	292	209	806	229	393	116	380	49	222	381	576	3.69467	3.60331	2.44354	2.85669	4.43234	3.68705	4.96768	2.44078	2.99221	4.97402	3.91962	17.5676	5.25958	8.43984	2.34436	8.68486	1.22381	4.5641	8.35982	11.1263	0.00291349	0.89625
ENSG00000011275	RNF216	1184	955	1301	1164	955	919	1145	1635	1356	1349	1173	1045	931	934	1093	1332	735	1141	1424	1308	5.385	4.41033	5.30888	5.2488	4.10585	4.29038	4.77931	6.14896	6.52834	4.85682	4.74511	4.95352	4.59854	4.35028	4.60444	6.67253	3.85427	5.10887	6.73569	5.373	0.6308	-0.0365266
ENSG00000157837	SPPL3	1172	1118	1295	1250	1227	1127	1098	1506	1325	1432	1277	1184	1210	1256	1171	1279	629	1269	1339	1779	7.16467	6.92591	7.02538	7.54266	7.0481	7.0504	6.10584	7.4854	8.47707	6.85354	6.97633	7.49252	8.03313	7.78443	6.6235	8.40945	4.40063	7.58013	8.53987	9.85481	0.65521	0.0322403
ENSG00000157833	GAREM2	243	143	81	122	63	76	155	176	135	299	103	176	113	282	116	116	85	188	212	149	1.47726	0.713343	0.35071	0.707496	0.290356	0.471484	0.844738	0.866909	0.696013	1.42428	0.454297	1.08296	0.744033	1.68079	0.65037	0.608707	0.586247	1.09032	1.33642	0.819197	0.540769	0.143924
ENSG00000168522	FNTA	2483	2700	2996	2857	2741	2469	2879	3042	2757	3901	2742	2700	2359	2979	2588	2529	1991	2918	2703	3291	26.848	32.7742	30.1858	31.7073	28.5866	28.7555	29.6005	29.7635	31.7465	35.0595	30.0962	33.1964	30.2045	35.4212	27.1165	29.9669	27.935	32.2493	31.0907	34.1326	0.50015	-0.0330085
ENSG00000165533	TTC8	617	480	376	350	334	352	400	389	515	791	373	494	354	556	441	565	321	456	610	749	6.53917	4.33861	2.58186	2.33054	2.3607	2.64369	3.43394	1.58615	2.80079	3.1569	2.88759	5.18682	3.25414	3.76424	4.02485	4.78876	1.98917	4.25781	6.40111	6.33963	0.186118	0.164136
ENSG00000161091	MFSD12	349	280	336	352	294	268	226	339	381	510	314	318	230	307	259	434	229	327	354	378	7.15922	5.89392	5.59349	6.47519	5.56761	5.47335	3.94299	5.6685	8.84919	7.55381	5.81462	6.42263	4.80595	5.88803	4.9031	8.60831	5.1845	5.70759	6.88896	6.68851	0.926884	-0.00853396
ENSG00000171476	HOPX	1716	1809	1953	1715	1612	1621	2252	1938	1427	3411	1931	1938	1848	2529	1841	1369	1787	2873	1641	2209	37.1816	38.8328	36.9549	36.7135	32.345	35.3352	43.6271	33.5084	31.8112	56.4331	38.1951	43.0616	42.9199	54.4982	36.6878	31.0362	43.9083	60.2256	36.1274	42.6541	0.291938	0.139325
NewGene_6071	NewGene_6071	92	107	167	140	234	250	255	388	140	377	252	393	297	151	278	95	201	304	126	166	1.15482	1.63722	2.0565	1.96569	3.28273	3.7677	3.41944	4.86392	2.09328	4.51851	3.45935	6.22784	5.08622	1.65282	3.76529	1.53843	3.44072	4.68945	1.74533	2.07284	0.455618	0.209761
NewGene_6070	NewGene_6070	283	187	207	161	164	181	215	280	238	335	218	220	165	255	216	325	135	244	354	322	0.96699	0.590653	0.635169	0.405736	0.393252	0.490797	0.49231	0.590955	0.873997	0.677299	0.496669	0.647237	0.540727	0.657977	0.599734	1.02755	0.391984	0.913429	1.03936	1.04551	0.104064	0.189404
ENSG00000146830	GIGYF1	1511	1279	1428	1349	1021	771	1340	1889	1474	1731	1283	1703	1193	1567	1478	2129	1048	1183	1801	1498	5.87936	5.02479	4.93859	5.25234	3.80676	3.06158	4.7123	6.0123	6.04272	5.2911	4.45232	6.89263	5.03901	6.2787	5.31131	9.44844	4.65763	4.51863	7.2756	5.27505	0.0749304	0.191126
NewGene_1144	NewGene_1144	252	290	196	208	287	207	386	327	209	687	276	238	209	321	211	119	331	493	251	200	10.5659	12.2971	7.30915	8.62018	11.3482	8.88616	14.5691	11.165	9.1761	22.6057	10.3792	10.3051	9.50879	13.6603	8.18464	5.34128	15.9172	20.2291	10.9043	7.594	0.816692	-0.0545218
ENSG00000178381	ZFAND2A	224	222	116	167	177	140	217	240	229	521	174	210	143	283	223	224	218	291	227	297	6.57765	6.53475	3.0151	4.84584	4.88717	4.02341	5.63988	5.75999	6.9687	11.9398	4.59917	6.31857	4.56288	8.10469	5.96689	7.07321	7.28073	8.35835	6.82908	7.91327	0.417457	0.14059
ENSG00000042429	MED17	690	685	898	813	880	781	720	951	918	914	799	820	817	765	817	939	528	778	743	860	4.27479	4.16152	4.04551	4.37084	5.21103	4.02978	3.30129	3.88918	6.7227	4.55457	3.5471	5.09378	5.1002	5.05264	5.0851	6.02456	3.27458	5.15974	3.82966	4.44209	0.975121	-0.00235384
ENSG00000178385	PLEKHM3	446	399	563	389	449	390	535	678	569	523	448	401	378	358	409	579	294	486	522	559	1.1935	1.04169	1.2909	0.992862	1.10446	1.02988	1.28862	1.45841	1.5459	1.05794	1.07307	1.08051	1.08834	0.938918	0.978432	1.6021	0.86975	1.22605	1.403	1.31219	0.307607	-0.0913051
ENSG00000178386	ZNF223	110	110	180	116	105	142	135	137	184	182	140	168	144	145	74	179	95	101	160	157	1.32184	1.18813	1.88727	1.52795	1.27085	1.55864	1.34698	1.20227	2.27436	1.66186	1.51676	1.99804	1.83354	1.61839	0.883228	2.25999	1.26041	1.08994	1.80751	1.53544	0.818618	0.0326782
ENSG00000171867	PRNP	4751	4559	4316	3961	5131	4858	4192	4711	5108	5973	4053	5149	3844	4716	4283	4536	2807	5229	5049	6779	45.5689	44.6306	37.0968	37.5567	46.0545	48.0927	36.8013	36.5375	52.1146	44.6182	34.6323	50.7636	40.1466	46.0062	37.8412	46.4982	31.4087	48.8691	50.1396	59.0431	0.8593	0.0137585
ENSG00000171865	RNASEH1	278	319	343	325	239	273	352	391	338	334	246	286	300	328	259	379	218	294	282	355	3.4648	4.02404	3.85988	4.03994	2.85354	3.49182	4.1083	3.94795	4.46821	3.28416	2.842	3.62286	4.01052	4.21924	3.01466	5.01288	3.06779	3.54044	3.6779	4.10818	0.575274	-0.0487031
ENSG00000171863	RPS7	11379	10731	7944	10691	7677	7468	11367	9058	7086	21479	8136	9659	7535	15432	8089	6602	9029	11732	9621	9713	405.247	360.015	233.752	353.569	241.755	255.651	334.361	248.363	236.711	562.16	233.577	302.573	272.646	511.335	229.25	233.792	357.074	381.128	344.337	272.204	0.884217	-0.0239463
ENSG00000171862	PTEN	2946	3028	3485	3031	3284	3199	3332	3580	4094	5096	3131	2961	2937	3209	2948	3209	2465	3191	3606	3743	8.30965	8.69913	8.70058	8.50397	8.68663	9.27074	8.4258	8.18011	12.088	11.294	7.87087	8.61983	8.99706	9.15039	7.77829	9.65584	7.93227	8.84914	10.5321	9.57554	0.142203	-0.0792165
ENSG00000171861	MRM3	624	600	717	685	613	520	521	751	615	792	631	621	632	508	701	626	408	536	548	643	8.8188	8.6072	8.98739	9.53066	8.17822	7.46399	6.6581	8.66132	9.15748	8.71255	8.01019	9.04448	9.92393	7.40168	9.10826	9.49796	6.58817	7.45421	8.01734	8.24872	0.463173	-0.0601876
ENSG00000171860	C3AR1	248	202	82	101	192	138	115	146	267	356	71	114	52	331	83	190	49	223	100	287	3.00419	2.46929	0.877365	1.20837	2.18336	1.70822	1.2471	1.43732	3.39098	3.38247	0.761728	1.41631	0.679879	4.07607	0.928344	2.45924	0.671945	2.64448	1.25667	3.15573	0.387432	-0.265874
ENSG00000041880	PARP3	727	577	606	478	496	443	513	716	520	638	450	512	377	578	421	614	313	601	554	853	7.85252	6.6304	6.07998	4.98194	5.20346	4.89522	5.3703	6.22837	5.82326	5.59144	4.46334	6.1517	4.57354	6.43222	4.22867	7.19457	3.94463	6.23553	6.1897	8.99956	0.491813	-0.0689363
ENSG00000174989	FBXW8	422	114	441	294	127	279	257	249	417	508	358	364	258	108	324	515	209	384	419	415	2.45273	1.23942	2.47658	1.78046	1.29065	1.90138	1.46239	2.18866	2.57224	2.34168	1.78901	2.48947	1.58222	1.17957	1.81631	3.18564	1.33482	2.21734	2.57049	2.26505	0.419549	0.191471
ENSG00000134453	RBM17	2240	2006	2330	2240	2027	1982	2188	2556	2232	3015	1953	2185	1913	2248	2078	2185	1553	2069	2056	2559	18.2295	15.7691	16.0164	20.276	16.6139	16.2144	15.9751	16.4462	23.0889	18.5394	16.7009	17.1376	16.068	18.1991	14.816	22.1629	17.2325	16.3801	18.1778	17.6331	0.0922163	-0.0599118
ENSG00000134452	FBH1	1925	1739	1956	1848	1727	1681	1951	1994	1884	2220	1813	1675	1452	1838	1888	2024	1122	1787	1855	2121	13.7063	12.5006	12.3414	12.9787	11.5546	12.2398	12.4631	11.5246	14.0407	12.3679	11.5423	12.2315	11.2227	13.253	12.4331	15.4168	9.12979	12.4319	13.6707	13.6788	0.289453	-0.0479311
ENSG00000124802	EEF1E1	673	608	625	599	664	693	634	657	664	1159	667	570	536	634	524	410	602	790	516	707	16.925	15.3274	13.4847	14.5574	15.5187	17.2424	13.7849	12.9364	16.81	22.0807	14.355	14.235	14.5081	16.0547	11.9486	11.1178	16.9684	18.8299	13.1374	15.6879	0.286566	-0.129278
ENSG00000160058	BSDC1	2025	1800	2322	1659	1755	1453	1909	2342	1931	2396	1797	1896	1705	1921	1580	2018	1258	1846	2058	2263	13.9266	14.9065	14.205	11.6651	12.243	12.3807	12.4315	12.8891	14.0975	12.723	13.3943	13.5	14.8257	16.1627	10.5653	15.5974	11.7918	13.0303	14.3302	14.2381	0.634363	-0.0239053
ENSG00000160055	TMEM234	205	108	111	145	144	105	167	166	137	151	112	151	145	239	131	142	133	144	174	155	3.53636	2.09192	1.86984	2.61129	2.3988	1.92205	2.8026	2.74191	2.5298	2.08288	1.85094	2.73988	2.87046	4.3686	2.17312	2.89237	2.69885	2.48674	3.32696	2.432	0.273331	0.160147
ENSG00000243317	STMP1	1471	1494	1272	1241	1404	1225	1604	1475	1396	2847	1697	1289	1353	1697	1377	1053	1219	1771	1324	1716	16.4628	17.0265	12.7464	13.4661	14.6383	14.0003	16.2047	13.4236	16.3681	24.5365	17.2128	14.7371	16.068	18.6499	14.324	12.9035	15.64	19.4518	15.4368	17.4789	0.926199	0.0104835
ENSG00000160050	CCDC28B	743	618	769	715	556	614	723	691	582	977	886	692	671	595	679	505	596	683	647	648	16.2671	13.6963	14.703	15.3194	11.8434	13.9743	14.4509	11.63	13.9957	16.6417	17.5694	15.7503	16.2556	13.3147	13.9392	11.6011	15.5796	14.9636	14.8277	13.2208	0.909498	0.0123816
ENSG00000160051	IQCC	72	41	54	60	71	40	57	78	70	67	88	70	52	65	69	73	63	75	72	59	0.802432	0.517595	0.562294	0.661771	0.807644	0.501299	0.636206	0.758974	0.816125	0.607029	0.961054	0.811004	0.629938	0.790551	0.788928	0.935748	0.897306	0.877191	0.836823	0.594888	0.074468	0.252619
ENSG00000215041	NEURL4	1137	911	1261	1001	801	760	896	1335	955	936	896	1051	941	901	1120	1268	599	906	1191	1031	5.65288	4.51527	5.68626	4.85598	3.67238	4.11647	3.93374	5.32261	5.03975	3.87409	4.2751	5.41449	4.9981	4.51347	5.39541	6.75048	3.4958	4.32111	6.09719	4.64417	0.616426	0.0503156
ENSG00000042286	AIFM2	570	528	640	494	452	439	486	575	677	932	481	505	442	525	391	569	344	522	588	676	4.51576	4.21891	4.51899	3.84535	3.36887	3.56309	3.48384	3.82785	5.65221	5.74092	3.38175	4.12114	3.7828	4.19659	2.88871	4.91507	3.14771	4.00159	4.79667	4.84785	0.110842	-0.121404
NewGene_11915	NewGene_11915	647	690	1105	822	564	731	795	974	970	870	920	1001	843	756	813	785	861	605	870	879	1.84835	1.99096	2.79844	2.31651	1.51302	2.13615	2.04213	2.25995	2.89919	1.94364	2.34741	2.94621	2.61217	2.18859	2.14968	2.39856	2.81443	1.68762	2.57045	2.27494	0.312591	0.125289
ENSG00000146197	SCUBE3	43	44	45	26	30	55	156	40	53	39	58	134	51	42	40	18	55	36	40	26	0.146968	0.151851	0.135201	0.087888	0.094672	0.192318	0.481349	0.112055	0.189723	0.104087	0.17645	0.472867	0.189108	0.14661	0.127127	0.066033	0.216483	0.118456	0.139265	0.079411	0.983677	0.00749896
NewGene_11916	NewGene_11916	1889	1650	2445	1884	1636	1715	2451	2643	2207	1951	2235	1837	1786	1558	2082	2196	1783	1825	1959	1869	6.20687	4.97691	6.93902	6.20694	4.89027	5.76049	6.76058	6.58348	6.90954	5.03808	6.63668	5.96034	5.98459	5.22659	6.31187	7.40359	6.01133	5.60255	5.94726	6.12929	0.908437	-0.0119853
NewGene_11911	NewGene_11911	290	196	200	278	163	107	288	300	300	282	141	224	228	174	165	279	208	270	256	228	2.36256	1.72585	1.33875	2.24299	1.50619	0.954005	2.19935	2.06143	2.48056	1.89308	0.998158	1.88027	2.02858	1.56623	1.21718	2.54332	2.06603	2.37205	2.07707	1.90793	0.762187	-0.0498631
ENSG00000175581	MRPL48	717	743	618	657	669	657	690	784	748	1132	923	623	652	755	695	537	701	975	687	779	12.504	15.121	11.55	12.5863	13.3753	11.4288	12.8758	11.6831	14.0775	18.2393	14.5696	10.8472	14.2221	16.982	13.8874	11.4445	14.8822	18.609	12.1003	13.6986	0.473812	0.0797293
ENSG00000175582	RAB6A	5057	4910	6080	4955	5479	5372	5258	6502	5930	7401	5619	4607	4948	5463	5321	5138	3641	6008	5615	7498	38.7641	37.9524	41.393	38.7476	40.435	42.9884	36.3645	40.4592	49.0139	44.1175	39.6417	37.5362	42.3445	43.8112	38.8353	42.0489	32.4941	46.2128	45.8499	53.8081	0.78835	-0.014904
ENSG00000132153	DHX30	1993	1777	2544	2091	1797	1684	1859	2633	2064	2250	2137	1894	1748	1804	2355	2578	1171	1724	2169	2300	13.2948	12.0983	14.1518	13.7971	11.333	11.5208	10.9525	14.3921	14.6588	11.8374	12.7478	13.083	12.7994	11.807	14.8958	18.5349	9.18303	11.2898	15.0529	13.8463	0.962008	0.00392681
NewGene_10955	NewGene_10955	127	154	121	128	133	81	107	137	94	174	100	136	152	153	149	122	104	158	119	178	1.71408	2.09699	1.44822	1.69964	1.68237	1.12096	1.29721	1.5054	1.32308	1.83934	1.21022	1.89344	2.23409	2.09043	1.85545	1.76677	1.59939	2.07842	1.66383	2.17811	0.111653	0.203151
ENSG00000036530	CYP46A1	101	77	93	58	86	76	82	118	94	105	69	64	76	55	92	103	52	113	81	116	1.08553	1.40392	0.808296	0.502724	0.867857	0.869703	0.795578	1.24662	0.922155	0.942956	0.691224	0.64336	0.896774	0.566945	1.03055	1.13553	0.673196	1.23628	1.11537	1.2269	0.707832	-0.0505061
ENSG00000065989	PDE4A	850	772	790	727	557	546	554	696	621	1051	356	614	412	831	362	668	444	800	741	967	5.35432	4.91542	5.3974	5.10116	3.87419	3.01353	3.71201	3.39728	4.88341	5.77774	1.68216	4.4496	2.66156	5.5301	2.48476	5.15301	3.64907	4.45204	4.24167	6.05228	0.303491	-0.1524
ENSG00000177981	ASB8	3287	3585	4532	3375	3762	3991	3788	4587	3716	4186	4344	3800	3499	3017	3554	3123	2940	3503	3900	4290	33.9067	37.5862	41.6682	34.6241	37.4246	42.1566	35.4547	38.2046	41.4184	33.3554	39.5778	39.7369	39.1908	31.2983	33.5605	34.5608	35.2315	35.0788	42.893	41.0751	0.657787	-0.0382652
ENSG00000177989	ODF3B	230	144	176	201	151	124	126	196	275	692	124	142	114	177	141	220	156	241	165	239	6.95858	4.27703	4.39111	5.57956	4.04599	3.56065	3.20943	4.4984	8.3419	16.1712	3.23996	4.19973	3.75753	5.47389	3.79953	6.63768	5.03109	6.8491	5.1061	6.25655	0.193019	-0.286983
ENSG00000175634	RPS6KB2	920	749	732	711	577	475	853	886	821	1239	848	749	646	806	763	726	615	804	718	942	13.4729	11.1902	9.53447	10.3139	8.00229	7.0876	11.0984	10.6993	12.5037	14.3007	11.0493	11.3385	10.1993	12.0108	10.228	11.4015	10.2242	11.4798	11.0964	12.3865	0.740048	0.0291067
ENSG00000135324	MRAP2	161	142	73	89	117	109	82	84	165	244	129	136	89	184	111	302	73	157	163	420	1.89311	1.68346	0.758324	1.02853	1.28513	1.30217	0.859906	0.79767	2.02553	2.2463	1.35485	1.64841	1.12876	2.19115	1.20335	3.80175	0.973938	1.7983	1.98116	4.47798	0.0379391	0.502319
ENSG00000147400	CETN2	1004	1017	731	845	862	728	980	938	896	1642	1032	1002	661	1330	902	821	759	1134	1031	1114	17.5151	17.9201	11.2994	14.5449	14.1255	12.9936	15.3696	13.2914	16.3493	22.4129	16.0861	18.0204	12.5082	23.5162	14.5654	15.3058	15.1402	19.3266	18.6119	17.6097	0.328271	0.10533
ENSG00000147403	RPL10	42254	38700	28016	30642	27953	24800	39293	30889	25478	62147	33240	28598	29305	56608	29832	24121	32244	42949	35801	34474	962.874	588.437	352.912	440.518	402.351	356.432	522.862	482.728	377.659	715.251	443.953	445.074	481.94	833.543	403.853	374.004	556.992	792.782	561.934	475.686	0.561728	0.0893052
ENSG00000147408	CSGALNACT1	2084	2022	2300	2070	1631	1675	2307	2945	3149	3150	2789	2744	1797	1607	3215	2340	1620	2797	3136	3284	14.1803	13.94	13.7181	13.8633	10.3089	11.4881	13.8705	15.9907	22.0155	16.1766	16.1485	18.6973	13.2605	11.2389	19.4449	17.3561	12.2854	18.874	21.2145	19.6779	0.0913943	0.196472
ENSG00000003137	CYP26B1	336	317	492	403	423	381	377	408	441	478	325	334	521	385	532	420	263	384	435	261	1.93249	1.85367	2.60529	2.28381	2.2058	2.19747	2.10745	1.81937	2.51031	2.12244	1.56393	1.83959	3.09875	2.17014	2.78195	2.44462	1.66923	2.05547	2.54683	1.26649	0.924626	0.01333
ENSG00000132313	MRPL35	2153	2212	2985	2245	2305	2418	2770	3191	2160	2499	2372	2314	2248	2061	2444	2246	1963	2263	2066	2300	14.9963	15.4178	19.4576	15.3927	15.4868	16.9624	17.2448	18.0823	15.8419	13.5301	14.5519	19.1488	16.8617	14.8701	15.513	16.475	15.5073	15.7327	16.9507	14.369	0.372811	-0.0834941
ENSG00000221978	CCNL2	3372	2824	3162	3041	2014	2136	3253	3689	3611	4258	3248	3559	2250	3217	3251	3808	2313	2606	4081	3526	39.2453	30.5471	32.454	34.2856	21.4823	25.7936	31.8051	32.5796	42.6439	34.7996	33.7683	42.4094	28.0831	37.7064	34.2769	44.1295	30.7722	29.3139	48.6328	36.8448	0.257093	0.102731
ENSG00000177674	AGTRAP	670	582	436	425	411	310	487	540	427	908	562	513	353	688	445	510	280	472	578	651	15.4238	14.228	9.00935	9.66133	8.96926	7.29269	10.1244	10.1872	10.4909	16.4841	11.7734	12.1887	8.82727	16.1467	9.90155	12.8046	7.33098	10.6238	14.0573	13.7637	0.794121	0.0331733
ENSG00000177675	CD163L1	167	144	90	55	92	74	131	103	160	187	23	95	51	267	78	234	62	137	99	124	0.91734	0.79552	0.435225	0.290896	0.486913	0.413443	0.646741	0.458466	0.913089	0.802469	0.112956	0.533496	0.299832	1.47982	0.395664	1.37584	0.475658	0.7348	0.562524	0.613155	0.961919	0.0146537
ENSG00000237765	FAM200B	845	911	825	802	736	678	906	732	740	1656	801	877	746	912	675	527	745	934	899	982	6.08826	6.95675	5.16907	6.09889	4.5437	4.97778	6.65059	4.5282	4.93248	9.25181	4.67326	6.16809	5.76731	7.58947	4.27753	4.27223	6.28745	6.59905	6.22838	6.11307	0.850991	-0.0235539
ENSG00000177679	SRRM3	364	324	261	230	230	211	357	523	330	599	295	308	272	348	304	492	217	398	279	406	2.55051	2.2947	1.62322	1.59318	1.51359	1.50926	2.25107	2.984	2.42428	3.29131	1.84593	2.22859	2.06699	2.47274	1.97095	3.69242	1.74101	2.72801	2.02773	2.5783	0.728365	0.0471423
ENSG00000272196	HIST2H2AA4	331	330	289	221	475	282	319	335	241	419	284	310	214	382	301	258	232	388	173	298	14.8514	14.9698	11.5227	9.79622	20.0666	12.9349	12.8985	12.2126	11.3231	14.7308	11.3796	14.3433	10.4202	17.3847	12.4933	12.3935	11.927	17.0149	8.04365	12.1313	0.44226	-0.119979
ENSG00000172009	THOP1	771	659	956	668	599	636	729	979	648	899	754	715	567	687	695	907	532	618	678	884	4.81105	4.78574	5.25927	4.12307	3.50148	5.04732	4.2718	4.94165	4.45161	6.8705	4.45459	5.68029	4.05762	4.88838	4.18814	6.49935	4.27447	3.96993	4.96142	5.12537	0.710682	-0.0288426
ENSG00000172000	ZNF556	711	749	1633	1091	1157	1319	1152	1790	1301	1023	1357	1383	1414	604	1165	822	938	800	1096	849	2.91544	3.0788	5.95922	4.41374	4.48561	5.54606	4.25417	5.90398	5.47583	3.16244	4.75917	5.70007	6.10776	2.57223	4.37252	3.67718	4.39866	3.38504	4.68789	3.21286	0.620755	-0.0958683
ENSG00000172005	MAL	897	843	1187	1233	1565	1210	1646	1838	1495	1721	1664	879	869	849	1157	708	783	1356	911	1265	20.5509	19.4212	23.9992	27.7574	33.5531	28.2261	33.7469	34.0501	35.6934	30.7167	33.9163	20.6609	21.5096	19.6334	24.4252	17.2625	20.4289	30.205	21.509	26.1465	0.050504	-0.305057
ENSG00000172006	ZNF554	376	310	362	338	309	312	323	512	338	413	382	395	316	272	299	317	251	270	374	436	3.64041	3.00149	3.05474	3.16996	2.74159	3.22566	2.87679	4.58149	3.46583	3.0615	3.45981	4.3344	3.40636	3.06643	2.68799	3.17632	2.65431	2.75661	3.79983	3.66391	0.633182	-0.043605
ENSG00000172007	RAB33B	650	665	583	565	651	583	607	734	758	1129	604	662	536	903	579	676	453	742	676	811	3.61377	3.73294	2.87093	3.09639	3.39951	3.31104	3.03441	3.31397	4.41099	4.91047	2.99981	3.79238	3.23331	5.08825	2.97569	4.01749	2.87984	4.02713	3.88835	4.08346	0.832401	0.0174185
ENSG00000198805	PNP	276	215	397	375	434	393	287	304	461	580	345	255	258	272	272	258	209	397	341	430	4.67657	3.64998	5.91364	6.20875	6.90095	6.76748	4.32344	4.26876	8.12145	7.64017	5.19207	4.40281	4.71328	4.66272	4.22968	4.696	4.00996	6.50709	5.93512	6.58611	0.103867	-0.227066
ENSG00000069869	NEDD4	1595	1924	1871	1414	1617	1413	1185	1821	2042	1871	1415	2094	1497	1673	1439	2086	955	1890	2049	3148	6.73598	7.67427	7.0409	5.71754	5.34739	6.02061	4.10358	5.21905	8.31418	5.52865	4.47887	7.73665	5.80759	5.9439	5.66885	9.42401	3.82786	7.20436	7.55879	10.8813	0.160779	0.160672
ENSG00000155252	PI4K2A	782	626	892	689	816	665	765	961	948	1055	707	747	672	724	781	914	452	969	875	1140	4.73701	3.82552	4.78643	4.11674	4.64228	4.11484	4.165	4.72689	6.0054	4.99857	3.82724	4.65815	4.41372	4.44263	4.37353	5.91502	3.12569	5.72735	5.47943	6.25273	0.775656	0.021425
ENSG00000115816	CEBPZ	1053	1209	1426	1131	1057	964	1198	1252	1409	1671	1041	1172	1075	1181	1232	1180	954	1092	1184	1252	7.71162	8.94351	9.27902	8.17753	7.27425	7.22035	7.88797	7.44616	10.8309	9.57152	6.81153	8.84919	8.54519	8.76886	8.34883	9.24061	7.99484	7.8131	8.97637	8.30673	0.560047	-0.0367612
NewGene_930	NewGene_930	332	370	1283	1227	671	725	1211	1273	489	330	1118	1042	431	662	172	774	1193	718	405	1487	0.688527	0.65851	2.45174	2.74556	1.32748	2.23384	2.36285	2.02308	1.06036	1.4787	3.64457	3.35803	0.945748	1.2857	0.270177	1.79444	4.6685	1.54135	0.776006	5.1088	0.819552	0.0850335
ENSG00000071991	CDH19	325	335	611	708	659	809	216	687	1197	610	600	494	441	467	796	683	278	426	635	806	1.29764	1.35173	2.17956	2.85463	2.5167	3.33042	0.77412	2.25548	5.13945	1.94119	2.1644	2.09842	1.93555	1.89834	2.96525	2.98605	1.29259	1.68487	2.62365	3.0018	0.691975	-0.0910408
ENSG00000071994	PDCD2	1506	1566	1453	1420	1476	1416	1617	1863	1401	2368	1595	1406	1355	1782	1306	1429	1357	1615	1425	1724	16.9521	17.39	12.4979	13.9887	14.0849	17.2354	16.2415	15.6008	14.7219	19.3515	15.2469	16.1062	14.7548	21.8076	11.9168	15.7479	18.7253	16.4578	16.0449	16.1065	0.862442	-0.0130733
ENSG00000135870	RC3H1	922	808	1176	947	1012	995	841	1111	1224	1335	1129	1237	978	1030	936	1066	737	1077	1040	1230	2.07721	1.84825	2.40482	2.36314	2.28445	2.29854	1.71359	2.04952	2.94771	2.35539	2.36903	2.87058	2.41084	2.36464	1.94844	2.56858	2.05252	2.38587	2.42312	2.51065	0.220205	0.0852826
ENSG00000157429	ZNF19	79	82	66	69	56	31	56	92	50	113	94	73	65	83	40	96	28	76	80	77	0.803914	0.660628	0.463704	0.677634	0.45821	0.360872	0.627404	0.839949	0.415695	0.713625	0.673751	0.77767	0.721428	0.724296	0.321624	0.803077	0.371574	0.794507	0.857269	0.849267	0.555707	0.109161
NewGene_6309	NewGene_6309	461	360	329	255	425	374	297	314	319	438	244	418	193	327	297	374	233	346	303	462	1.37157	1.08354	0.868455	0.749696	1.18827	1.13866	0.793165	0.759189	0.991847	1.02062	0.647525	1.28303	0.622627	0.986415	0.816207	1.19044	0.792941	1.00531	0.932043	1.24615	0.387467	-0.114007
ENSG00000138018	SELENOI	708	804	1202	875	832	857	825	1176	1096	876	939	863	910	689	917	1055	576	798	947	1025	2.20937	2.53869	3.32939	2.69605	2.43807	2.73824	2.32045	2.9867	3.5836	2.14036	2.61723	2.77543	3.08078	2.17769	2.65437	3.52436	2.05517	2.43305	3.06552	2.89835	0.830089	-0.0214732
NewGene_3150	NewGene_3150	58	67	54	42	45	48	61	94	69	176	64	60	48	125	34	65	61	90	100	79	0.542064	0.645774	0.425272	0.384146	0.437349	0.474851	0.540123	0.796919	0.656035	1.31179	0.595492	0.592895	0.549801	1.18804	0.310166	0.687223	0.682943	0.797986	0.969763	0.665054	0.514148	0.146281
ENSG00000271425	NBPF10	737	607	417	462	501	445	484	446	637	983	617	790	501	714	581	569	281	594	853	926	1.43319	1.19234	0.718532	0.886056	0.915123	0.883536	0.844855	0.703674	1.29628	1.49547	1.07194	1.58415	1.05595	1.40645	1.04588	1.18283	0.62426	1.12751	1.71564	1.63109	0.1047	0.225699
ENSG00000146469	VIP	50	51	56	47	61	66	56	59	15	9	34	39	44	64	58	105	23	48	92	54	0.789427	0.841498	0.929852	0.722614	0.903708	1.10113	0.792598	0.778402	0.246293	0.110736	0.485727	0.651546	0.750153	1.05367	0.849186	1.80259	0.411052	0.75219	1.57279	0.788986	0.45465	0.240975
ENSG00000136144	RCBTB1	2665	2961	3643	3034	3014	2748	3222	3847	3482	3439	3053	3563	3089	2495	3080	2979	2172	3347	2971	3316	16.794	18.8275	20.3213	18.8568	17.8368	17.7049	18.2825	19.6609	23.1191	16.9346	17.2044	23.1342	21.0982	15.9209	17.976	20.0551	15.6465	20.5748	19.357	19.109	0.798772	-0.0194062
ENSG00000136147	PHF11	531	503	441	452	459	465	560	628	550	1045	492	521	467	668	534	495	393	602	485	684	11.0409	9.64765	7.15788	8.80217	7.94116	8.86853	11.2245	9.89194	11.0717	16.2274	8.17946	10.4819	9.93547	13.2357	9.99295	9.84326	8.14166	11.2298	9.43406	12.3487	0.870342	0.0156631
ENSG00000136146	MED4	1556	1352	1342	1391	1135	1074	1576	1791	1664	2352	1662	1728	1405	1788	1565	1387	1302	1701	1418	1962	21.6724	18.3306	15.6487	18.824	15.0181	15.2135	18.8863	19.289	25.0289	24.6232	20.3793	24.7552	20.9017	23.985	19.0236	20.8143	20.2908	22.3222	20.0456	25.1412	0.0454876	0.158381
ENSG00000136141	LRCH1	544	619	837	769	699	679	545	829	941	846	622	540	562	549	778	771	447	572	731	806	2.94176	3.38109	4.03066	4.11812	3.57356	3.7571	2.66565	3.645	5.34578	3.57985	3.02204	3.10092	3.30655	3.02205	3.93049	4.46024	2.7796	3.02978	4.12586	3.94302	0.183694	-0.131689
ENSG00000136143	SUCLA2	6843	7975	10880	8426	8814	8657	8929	10342	8152	9457	8733	7879	8251	7708	8858	6988	7216	7588	7195	8018	81.644	94.4627	115.145	99.123	97.2927	105.686	94.7671	100.323	102.934	87.1981	94.4017	95.6859	105.292	91.4068	97.804	88.7165	96.5661	88.3648	88.2325	85.941	0.368517	-0.0898953
ENSG00000172915	NBEA	455	549	949	652	707	755	705	818	845	716	505	594	818	446	608	671	502	485	715	716	1.94885	1.31967	4.0659	2.54956	2.59941	3.17336	1.96895	2.327	3.16252	1.64249	1.32222	2.38658	2.55093	1.96855	2.27989	2.46034	1.40575	1.71299	3.04998	2.65542	0.244111	-0.162576
ENSG00000144199	FAHD2B	885	765	1160	1022	942	893	912	1085	792	1035	1143	941	878	846	1006	803	743	1235	758	1020	16.4406	14.2553	19.0959	18.7892	16.4727	16.7669	15.2552	16.4524	15.3121	15.1515	19.0791	17.9873	17.7501	15.8794	17.2671	16.1462	15.8712	22.3004	14.6228	17.101	0.60846	0.0550724
ENSG00000077279	DCX	73	58	78	80	73	92	44	79	123	171	73	34	58	110	54	112	32	145	116	153	0.196601	0.158036	0.185808	0.212131	0.182607	0.252876	0.105111	0.172289	0.341472	0.362406	0.174801	0.093361	0.167137	0.296377	0.133667	0.322864	0.096675	0.380766	0.323508	0.372535	0.759832	0.0752259
ENSG00000085117	CD82	558	574	817	734	868	799	483	809	1028	837	505	517	584	387	522	670	372	437	638	646	6.18194	6.44674	8.01921	8.06739	9.06951	9.10904	4.8106	7.27926	12.1306	7.25507	4.99531	5.91331	7.08832	4.3475	5.37585	7.97166	4.82606	4.81541	7.33703	6.49443	0.000638967	-0.445407
ENSG00000077274	CAPN6	2229	2263	1739	1860	2127	1778	1991	2036	2415	4550	1528	1697	1351	3909	2847	3117	1285	3228	3062	2119	15.8538	16.2551	10.9577	13.0476	14.2097	12.9305	12.7253	11.7584	17.9656	25.3104	9.70985	12.4381	10.4215	28.1792	18.7301	23.7007	10.4459	22.4194	22.5276	13.6469	0.390876	0.148143
ENSG00000174514	MFSD4A	107	122	229	187	118	124	120	163	174	158	166	157	202	98	166	106	96	152	143	192	0.659384	0.75864	1.2608	1.15574	0.713638	0.785377	0.662917	0.818648	1.12231	0.765069	0.916729	1.00766	1.37487	0.614476	0.94861	0.698196	0.678116	0.914845	0.90889	1.07247	0.749532	0.052765
ENSG00000174516	PELI3	406	265	363	283	268	235	431	467	295	551	358	309	200	346	251	400	253	439	408	464	3.89735	2.50422	3.14395	2.81202	2.641	2.33547	3.77017	3.56711	2.90042	4.01408	3.03825	3.19248	2.15239	3.54259	2.19154	3.97654	2.71323	4.14039	4.02745	3.88605	0.86052	0.0220606
ENSG00000203705	TATDN3	961	1028	1186	894	974	937	1046	1298	1053	1118	1120	912	993	905	1052	866	958	882	1042	924	11.0152	11.7388	11.6305	11.413	10.4709	10.4584	11.2031	12.1397	12.332	9.97804	11.3229	10.871	12.4337	11.6766	10.6598	10.2688	12.1754	9.94828	12.2586	9.3825	0.766152	-0.0289529
ENSG00000116731	PRDM2	2132	2175	2737	2148	2061	2065	2118	2894	2437	2268	2015	2327	2228	1833	2139	2665	1613	1989	2318	2468	8.71876	8.85155	9.71642	8.30138	7.88029	8.46506	7.7877	9.49407	9.65271	6.46633	8.33491	9.82839	10.3433	7.25794	9.05805	12.2097	8.14441	7.97134	9.69632	9.1532	0.745267	-0.0250359
ENSG00000112893	MAN2A1	355	419	547	351	411	420	442	514	590	383	266	262	337	337	310	557	180	457	322	441	1.92953	2.29758	2.63231	1.87929	2.09877	2.33116	2.1583	2.26591	3.35595	1.62589	1.28859	1.46505	1.98575	1.85206	1.55966	3.23622	1.11349	2.42319	1.80882	2.16946	0.0261844	-0.311083
ENSG00000088448	ANKRD10	3218	2907	5175	3815	2737	2909	3075	4296	4906	5629	4229	4283	3515	3402	3595	3878	2760	3017	3956	5331	38.8505	34.5212	55.0176	46.5372	30.4887	35.0396	34.4222	43.4344	61.7104	51.3454	45.1902	53.1715	47.096	40.0278	39.7724	52.087	38.663	36.1808	50.2654	56.9286	0.555079	0.0596428
NewGene_5651	NewGene_5651	572	548	409	488	322	303	446	477	612	648	382	618	479	477	485	595	414	463	671	511	3.77949	4.12876	2.30809	3.36146	2.11103	2.54285	2.97646	3.19969	4.33294	3.37446	2.33769	4.16735	3.7246	3.22135	2.93052	4.82256	3.98378	3.42166	4.7311	3.51429	0.17077	0.164443
ENSG00000072310	SREBF1	1034	937	577	660	1408	1455	874	1093	1147	1458	1120	938	505	729	665	1010	399	1187	1611	1365	6.67223	6.05389	3.25921	4.13529	8.57348	9.72295	4.93847	5.80893	7.88183	8.27575	6.53834	6.10907	3.53923	4.62976	3.60757	6.87029	2.91612	7.40974	11.1716	9.03991	0.480003	-0.139932
ENSG00000269028	MTRNR2L12	852	900	702	675	1353	1012	1033	1011	701	633	944	718	566	896	1170	460	827	994	627	645	20.6002	21.9888	15.0321	16.0967	30.7391	25.0166	22.441	19.852	17.7419	11.9603	20.4077	17.89	14.847	21.9694	26.1787	11.8949	22.8552	23.4801	15.6727	14.1337	0.588293	-0.109926
ENSG00000151748	SAV1	1759	1652	1774	1622	1840	1660	1778	2010	1818	2588	1738	1606	1475	1954	1791	1858	1302	1959	2244	2434	14.5995	13.8337	13.1271	13.2776	14.3739	14.0752	13.2499	13.5383	15.7849	16.7968	12.8804	13.7499	13.2794	16.4158	13.7698	16.5873	12.3433	15.8697	19.2587	18.3831	0.294833	0.0554033
ENSG00000151743	AMN1	693	714	721	487	670	730	675	733	687	1016	684	626	642	811	625	563	420	920	536	673	9.4682	10.2011	9.24508	6.67581	8.80268	10.0234	8.16509	9.34935	9.96544	10.3125	7.84238	9.49947	10.2659	10.9782	8.26609	9.17015	10.5521	12.2733	7.77275	8.70806	0.597022	-0.0569442
ENSG00000151746	BICD1	494	450	853	516	617	697	1102	1177	980	780	596	454	540	382	644	640	701	429	635	599	2.07086	1.82172	2.80975	2.09389	2.18391	2.71061	3.45992	3.32265	3.57302	2.00887	2.21983	1.90671	2.14575	1.3571	2.22344	2.67738	3.1898	1.39292	2.29191	2.1273	0.0647072	-0.335427
ENSG00000140443	IGF1R	1465	1250	1413	1108	1053	1176	1197	1760	1630	1377	1239	1344	1130	1152	1323	2038	720	1342	1549	1748	3.03549	2.61692	2.67919	2.34464	2.1121	2.49411	2.31133	2.96315	3.53298	2.31389	2.29223	2.87118	2.5406	2.42055	2.53646	4.57293	1.7062	2.72109	3.38393	3.27998	0.492181	0.0673357
ENSG00000170876	TMEM43	3097	2847	2275	1884	2523	2330	2431	2736	2805	3215	1869	2251	1961	3704	2161	4081	1334	2702	3093	4061	23.5242	21.8736	15.3302	14.1338	18.0152	18.0985	16.6225	16.8747	22.303	19.1406	12.6823	17.719	16.1929	28.5462	15.2169	33.2057	11.6094	20.043	24.393	28.0302	0.479973	0.0919138
ENSG00000170873	MTSS1	1726	1596	1915	1931	1900	1774	1853	2477	2425	2925	1974	1748	1729	1638	1680	2142	1349	1465	2023	2231	8.90297	8.3527	8.85834	9.84924	9.20518	9.38717	8.67989	10.4412	13.0934	11.8633	9.11794	9.30636	9.65845	8.55324	8.04986	11.8966	7.9609	7.35067	10.8394	10.4347	0.11891	-0.110094
ENSG00000170871	KIAA0232	3121	3282	4395	3478	3302	3026	3668	4733	3922	3645	3440	3027	3431	2833	3338	3774	2366	3549	3382	4135	10.1898	10.8431	12.7396	11.2097	10.1294	10.1134	10.7942	12.5632	13.3928	9.30807	10.0336	10.1826	12.1673	9.37443	10.0821	13.2008	8.85328	11.3286	11.4345	12.228	0.360227	-0.068845
ENSG00000143867	OSR1	559	375	222	189	263	180	421	325	440	1056	264	352	123	964	203	468	308	515	557	359	7.32132	4.96542	2.57504	2.43706	3.23686	2.40446	4.95637	3.45357	6.02215	10.8265	3.08559	4.75409	1.73721	12.8043	2.45355	6.54754	4.60647	6.59158	7.55248	4.26029	0.614842	0.147378
ENSG00000013619	MAMLD1	313	236	413	454	326	348	290	458	378	386	341	333	308	204	295	268	252	268	337	399	1.72837	1.24402	2.01272	2.36029	1.59908	1.85871	1.39342	1.96394	2.08035	1.57736	1.59301	1.82539	1.7891	1.07861	1.42517	1.5936	1.60104	1.36439	1.91459	1.92069	0.134981	-0.188017
ENSG00000117069	ST6GALNAC5	659	725	541	552	696	672	393	614	639	518	608	877	618	486	807	833	359	815	746	998	5.27748	4.95271	3.24291	3.87002	4.41847	4.64677	2.38478	3.37098	4.90484	2.73978	3.6745	6.11302	5.3352	3.33156	5.04676	6.01942	2.77447	5.38422	5.22132	6.11419	0.0576671	0.276174
ENSG00000124587	PEX6	1012	851	925	853	1022	879	688	1179	917	936	979	880	614	876	860	1248	489	1155	1142	1237	7.38556	6.27623	5.98022	6.1431	7.01283	6.55668	4.51438	6.9887	6.99853	5.34647	6.39551	6.61803	4.84978	6.47479	5.80729	9.73629	4.0854	8.23664	8.62534	8.17216	0.520348	0.0700937
ENSG00000113761	ZNF346	341	319	413	370	313	253	342	380	357	480	351	338	324	334	267	323	280	291	329	430	3.74402	3.35587	3.92573	3.90641	3.12463	2.97896	3.3837	3.2961	4.02273	4.06392	3.34376	3.69038	3.67368	3.97508	2.61885	3.57284	3.47931	3.06458	3.65559	4.22595	0.542642	-0.0462953
ENSG00000169379	ARL13B	258	321	302	243	272	291	259	256	346	443	241	260	178	380	284	363	196	277	382	319	1.66761	2.29152	1.86365	1.97396	2.04147	2.64986	1.81713	1.71949	2.73218	2.28158	1.671	1.77169	1.46582	3.05073	2.01616	3.44239	1.49185	1.97779	3.04323	2.3097	0.945662	0.00766182
ENSG00000140993	TIGD7	422	410	512	460	404	402	453	490	582	599	616	523	449	473	401	500	276	420	464	527	2.99178	2.96055	3.22754	3.18598	2.68017	2.88131	2.85841	2.83901	4.29049	3.3221	3.86663	3.80924	3.42233	3.3623	2.62123	3.78771	2.21131	2.88123	3.3696	3.35229	0.598779	0.0430927
ENSG00000140992	PDPK1	1433	1412	1947	1584	1638	1538	1671	2186	1769	1484	1706	1613	1548	1313	1647	1956	1026	1711	1622	1923	5.04998	5.04548	6.23125	5.49813	5.48188	5.58355	5.3544	6.34589	6.62243	4.10178	5.40788	6.00887	5.9268	4.7195	5.43475	7.58285	4.17623	5.87153	5.96593	6.1572	0.968504	0.00349935
ENSG00000140990	NDUFB10	5855	6749	6385	6669	6265	6257	7625	6633	4557	7300	6468	4815	5892	6156	6104	4107	5765	6283	5281	5000	210.197	245.159	202.605	235.16	211.525	229.702	246.176	193.246	170.427	204.148	207.959	177.561	228.772	223.65	202.825	157.204	236.404	219.268	196.252	162.536	0.383622	-0.114593
ENSG00000169372	CRADD	853	1072	1188	1050	1117	976	1394	1318	1251	1948	1470	1178	1008	1220	1253	1052	916	1402	1051	1373	18.0772	23.2865	21.6733	21.7249	21.792	21.2209	26.6564	22.9009	28.4087	32.9659	28.1583	25.6858	23.4555	26.411	25.15	24.1775	22.5205	29.3725	23.4409	26.4859	0.519786	0.0605152
ENSG00000140995	DEF8	1323	1075	1214	939	950	897	1268	1460	1228	1812	1215	988	907	1315	1095	1113	855	1113	1359	1302	9.33883	8.4826	9.0318	10.0523	5.89539	6.69262	8.49814	8.79792	9.49385	10.7733	7.72998	6.87345	7.19919	10.3447	7.54241	8.75079	8.6158	8.27332	11.9446	9.27868	0.724286	-0.0250787
ENSG00000169371	SNUPN	772	742	667	563	649	588	700	878	653	1089	745	676	554	824	763	599	511	740	792	804	13.2602	12.3915	10.272	8.98336	9.78674	10.1927	10.0163	11.8201	10.7725	13.5635	10.2591	11.5858	9.41771	14.1076	11.8044	10.4499	9.4159	11.8643	13.6101	11.9271	0.771558	0.0224133
ENSG00000110492	MDK	807	586	414	485	519	501	452	547	456	944	751	588	421	654	728	608	376	697	961	933	21.3801	15.0453	9.1964	12.0367	12.5261	12.6703	10.3785	11.5632	12.9428	17.8528	16.9361	15.5841	11.4524	17.593	16.9452	17.1246	11.4925	17.2183	26.7089	21.9341	0.0318269	0.292047
ENSG00000110497	AMBRA1	650	542	783	599	650	600	622	807	737	889	700	673	615	523	626	905	395	625	740	857	3.41569	2.69755	3.67781	3.06713	3.1958	3.18485	2.91947	3.39838	4.03182	3.59409	3.07239	3.42656	3.42814	2.76497	3.01131	4.9718	2.27272	3.18663	3.93228	4.01752	0.822554	0.0172015
ENSG00000111728	ST8SIA1	123	112	61	79	106	92	127	119	73	150	75	142	73	154	110	86	55	75	101	85	0.385397	0.369044	0.204308	0.202633	0.309741	0.264273	0.482215	0.286949	0.260226	0.497457	0.211657	0.440918	0.230522	0.659833	0.264019	0.257734	0.188431	0.190569	0.349764	0.252213	0.760952	-0.0556798
ENSG00000111729	CLEC4A	68	33	25	35	46	35	34	41	77	109	63	44	30	63	51	41	36	42	46	92	1.33827	0.773655	0.434246	0.677344	0.845311	0.696257	0.589381	0.649628	1.58535	1.6846	1.10546	0.958524	0.62827	1.25671	0.94332	0.960734	0.809622	0.804331	1.11791	1.65043	0.64915	0.103247
ENSG00000111726	CMAS	1900	2022	2227	1918	1698	1840	2035	2408	2093	2885	2239	2027	1902	2067	1940	1844	1660	2105	1967	2729	27.0483	29.1708	28.1747	26.9875	22.7984	26.8329	26.2621	27.948	31.3385	32.2615	28.5218	29.8234	29.5405	29.8865	25.5228	28.1652	27.2076	29.4577	29.1049	35.4105	0.456352	0.042259
ENSG00000111727	HCFC2	1200	1165	1647	1183	1198	1155	1330	1553	1672	1737	1354	1425	1178	1217	1386	1472	925	1252	1330	1624	5.31076	5.21818	6.4568	5.16231	4.98058	5.22524	5.28724	5.5811	7.74137	6.01119	5.35311	6.49538	5.68316	5.45716	5.67218	6.96523	4.67769	5.40721	6.08978	6.50977	0.973179	0.00192368
ENSG00000111725	PRKAB1	714	579	745	655	635	520	741	928	826	1079	656	634	623	610	664	672	456	710	668	841	6.99286	5.69254	6.47411	6.38315	5.91016	5.3792	6.59134	7.38129	8.80401	8.63764	5.86188	6.53166	6.71969	6.006	6.116	6.99656	5.15685	6.83374	6.71611	7.53798	0.0999146	-0.100203
ENSG00000103489	XYLT1	383	223	357	397	256	252	154	283	396	308	123	196	179	314	343	350	160	229	266	297	0.980125	0.575392	0.810022	1.00424	0.616628	0.660428	0.354848	0.589346	1.06239	0.617356	0.280165	0.516023	0.495755	0.815642	0.811949	0.959953	0.467906	0.573089	0.704675	0.690134	0.189828	-0.240144
ENSG00000182103	FAM181B	122	97	55	65	90	68	35	120	79	101	76	90	43	76	113	166	21	114	62	101	0.785482	0.63339	0.311338	0.414293	0.546439	0.444228	0.201279	0.629933	0.532742	0.509998	0.438959	0.598783	0.296303	0.497219	0.672058	1.14451	0.153602	0.714715	0.412927	0.590455	0.736171	0.0849324
ENSG00000103485	QPRT	239	174	209	209	239	160	450	367	263	461	247	275	201	304	83	182	205	200	239	207	2.58292	1.89495	1.99676	2.2323	2.42302	1.76643	4.37234	3.2254	2.97191	3.89839	2.38669	3.06831	2.36168	3.33093	0.829162	2.104	2.53293	2.11099	2.67374	2.02426	0.204706	-0.256474
ENSG00000142599	RERE	3360	3389	5333	4116	3382	3153	4011	5740	4162	4107	3350	3974	3919	3450	4358	5074	2346	3137	4162	4681	12.8758	13.1886	18.1925	15.5283	12.1654	12.1732	14.0667	17.9444	17.1387	12.4317	9.94175	15.1755	15.077	13.2745	15.4143	21.3423	8.74388	11.6059	16.4367	16.2318	0.856239	-0.0185268
ENSG00000107902	LHPP	194	168	143	118	189	172	161	187	170	281	144	176	117	121	113	147	96	206	183	157	3.14666	2.6844	1.97314	1.84696	2.81174	2.8066	2.28403	2.5076	2.82019	3.45042	2.01017	2.85918	2.04588	2.02603	1.63184	2.5077	1.77104	3.18278	2.95267	2.53373	0.0852033	-0.215155
ENSG00000166747	AP1G1	1809	1837	2587	1957	2035	2078	1922	2513	2281	2104	1943	1962	1926	1607	1877	2178	1190	1973	2075	2448	6.7385	6.87739	8.83486	7.18756	7.08961	7.88545	6.41301	7.53494	9.05007	6.01173	6.38278	7.46737	7.80412	6.13689	6.4719	8.75644	5.18266	7.05635	7.92283	8.23247	0.287153	-0.084026
ENSG00000156219	ART3	3711	4764	5670	4794	4591	4532	3934	5332	4454	4710	4594	5179	5197	4731	4964	4353	4293	3961	3802	5787	61.3227	79.2043	82.8024	77.7172	71.0327	76.0542	58.297	71.9017	76.6238	60.6218	67.3877	88.4191	92.966	79.2594	75.8379	76.787	81.0461	63.5642	65.235	86.4977	0.41264	0.0876797
ENSG00000156218	ADAMTSL3	1674	1597	1304	949	1252	1182	1302	1700	1950	2555	795	1371	908	2802	1220	2706	1016	1653	1959	1792	5.85453	5.62493	4.05041	3.23733	4.08872	4.2181	4.08702	4.81777	7.16029	6.9131	2.454	4.89524	3.42096	10.0008	3.90586	10.1193	4.04449	5.64075	7.09355	5.61982	0.441789	0.138729
ENSG00000105887	MTPN	4321	4253	4547	3897	4364	4202	3767	4754	4892	6011	4091	4064	4032	4640	4020	4777	2874	4601	4269	5611	29.4288	29.3176	27.6392	26.2478	27.9574	29.3123	23.2248	26.4564	34.977	32.0052	24.8716	28.5266	29.8446	32.091	25.3264	35.0626	22.4496	30.7249	30.0935	34.6324	0.983531	-0.000961967
ENSG00000104408	EIF3E	10026	10054	8245	8612	8191	7954	10190	8837	8441	16824	7385	9772	8216	14549	7742	7659	9574	10864	8798	10666	168.802	172.502	124.763	143.93	130.79	138.292	155.28	121.12	149.665	224.554	110.227	167.976	150.276	248.184	121.177	138.893	184.93	181.839	154.455	162.082	0.592527	0.0691676
ENSG00000150907	FOXO1	1640	1638	2120	1610	1788	1770	1478	1965	2151	2235	1622	1650	1623	1558	1552	1802	946	1537	2159	2619	7.25538	7.32118	8.31274	7.02678	7.43232	8.00627	5.87695	7.06022	9.95575	7.73365	6.41067	7.52051	7.78909	6.98438	6.35166	8.52453	4.78528	6.64066	9.88384	10.4969	0.495482	-0.0580065
ENSG00000118564	FBXL5	4524	4626	5295	4175	4955	4835	4209	4988	4894	6657	4243	4915	4117	4678	4195	4213	3524	4862	4587	5264	34.4737	37.9014	37.7421	32.195	35.4238	39.3907	28.768	32.4348	41.3979	41.1649	29.506	39.745	34.0358	36.3864	31.4212	36.2946	30.9111	37.9235	36.3885	38.6137	0.278794	-0.0654432
ENSG00000110237	ARHGEF17	1744	1512	2258	1927	1582	1262	1605	2543	2359	1796	2105	1602	1560	1299	1967	2856	972	1471	1888	2433	6.54886	5.49324	7.15027	6.78728	5.29671	4.40775	5.26212	7.2356	8.7944	5.64199	6.77772	6.46559	6.21506	4.68511	6.35867	10.8157	3.98456	5.08831	6.55039	7.58228	0.875213	0.0202352
ENSG00000138867	GUCD1	2790	2674	4419	3522	2779	2144	3461	4306	3105	3443	2615	2322	3156	2870	3324	3238	2147	2200	2793	3152	20.0175	19.1661	27.7839	24.5828	18.574	15.4428	22.039	24.8565	23.3261	19.3463	16.6453	17.1705	24.2584	20.6152	21.9673	24.952	17.4216	15.2916	20.7188	20.2222	0.18225	-0.148083
ENSG00000134152	KATNBL1	590	608	549	465	509	585	603	693	595	904	621	642	483	731	559	624	488	647	612	740	6.60151	7.65485	6.52318	5.58313	5.37621	6.59603	6.14335	6.93839	7.66912	7.8551	6.00927	8.60985	6.21047	9.07108	6.14515	8.68789	7.24722	7.24381	7.87096	7.7056	0.196313	0.0891497
ENSG00000134153	EMC7	1424	1470	1517	1436	1597	1481	1445	1484	1507	1927	1621	1401	1307	1689	1473	1193	1075	1532	1298	1717	31.288	32.6034	29.5299	31.1108	32.9509	33.3337	28.6969	26.4749	34.6236	33.3369	31.8277	31.7072	31.1565	37.6121	29.9346	28.0177	27.1472	33.0431	29.4936	34.168	0.712841	-0.0277537
ENSG00000105771	SMG9	691	623	639	561	482	469	585	602	510	677	582	624	584	586	643	680	374	677	668	817	3.53481	3.14376	2.75729	2.70043	2.22552	2.37307	2.51026	2.33581	2.5558	2.56649	2.41831	3.38084	3.00478	2.87864	2.87542	3.70881	2.0362	3.17874	3.33426	3.52477	0.0371887	0.152095
ENSG00000131508	UBE2D2	3310	3299	3485	3182	3125	3176	3696	3954	3158	4862	3895	3516	3133	3565	3299	2880	2912	4257	3434	4112	31.7541	31.5497	29.1798	29.6761	27.939	30.929	31.6746	30.8244	31.3926	36.1706	32.9668	34.3286	32.2249	34.1099	28.911	29.0481	31.9396	39.393	33.5996	35.4461	0.313182	0.0723356
ENSG00000014824	SLC30A9	4806	5294	6946	4827	5891	5472	6207	7295	6283	7101	6068	5358	5569	5084	5911	5338	4777	5560	5373	5995	19.6142	21.8243	25.1448	19.435	22.652	22.835	22.8025	24.1789	26.8267	22.6678	22.1289	22.5338	24.6621	21.0305	22.3209	23.2951	22.2958	22.1606	22.6896	22.1594	0.592659	-0.0416702
ENSG00000162783	IER5	602	582	708	834	606	620	721	952	975	1030	806	648	661	592	686	950	417	590	716	888	3.64744	3.55809	3.79863	4.98416	3.44583	3.83861	3.92287	4.6817	6.17643	4.87878	4.36139	4.04308	4.34125	3.63365	3.84391	6.15022	2.88716	3.4858	4.48401	4.87211	0.516546	-0.0631859
ENSG00000166200	COPS2	3202	3301	3976	3394	3690	3638	3350	3803	4051	4739	3624	3720	3508	3939	3241	3346	2801	3592	3279	4235	14.1374	17.4831	15.9747	15.3397	15.1253	16.9025	12.9044	16.0633	18.5261	15.5067	15.8688	17.7003	16.6022	17.9275	13.6781	17.623	16.667	16.6612	15.1588	16.8817	0.989946	0.000799203
ENSG00000166206	GABRB3	72	58	45	30	59	49	26	37	77	62	16	44	35	104	22	68	12	36	44	103	0.307754	0.294242	0.167878	0.124333	0.236058	0.211228	0.099934	0.126993	0.341311	0.206693	0.060358	0.191339	0.160141	0.449995	0.085733	0.31011	0.056346	0.150939	0.192816	0.39882	0.784828	-0.0860845
ENSG00000131503	ANKHD1	1427	564	1321	1355	932	838	995	1048	2285	1212	1134	1338	917	887	968	894	766	798	827	1081	9.77318	3.19349	5.72673	5.67041	3.90214	6.24799	4.59715	4.47194	9.94139	6.28332	7.58182	8.32846	4.87067	4.87028	6.46547	4.95486	6.60014	3.88453	4.6004	5.00161	0.178322	-0.231271
ENSG00000152464	RPP38	299	267	245	282	289	243	305	298	233	415	271	232	230	273	250	282	230	263	254	267	6.05248	5.54427	4.237	5.11383	5.09934	4.94954	5.44991	4.42575	4.716	6.30596	4.4341	4.52205	5.10447	5.3603	4.45535	5.75223	5.00618	5.03933	5.41851	4.75072	0.289605	-0.0905978
ENSG00000152465	NMT2	552	408	564	541	467	501	546	650	580	724	447	447	348	672	500	605	364	481	606	601	5.17481	3.85658	4.67198	4.98231	3.8283	4.92276	4.36906	5.07131	5.84013	4.94886	3.4817	4.23998	3.56116	6.15382	4.38749	6.19756	3.73414	4.38174	6.02313	5.03911	0.47452	-0.0584329
ENSG00000181458	TMEM45A	210	150	101	173	117	106	165	136	203	424	154	142	151	302	100	163	99	213	159	263	3.39357	2.2448	1.40486	2.7129	1.71128	1.65697	2.40552	1.70202	3.27969	5.26755	2.16227	2.25962	2.59639	4.82204	1.44461	2.73788	1.75449	3.3431	2.59631	3.75019	0.767124	0.0612721
ENSG00000181450	ZNF678	270	271	268	204	256	280	231	252	330	342	246	245	232	304	321	279	170	248	318	228	0.973522	0.86415	0.834297	0.690523	0.934437	0.924244	0.722455	0.73498	1.19323	0.793008	0.780841	0.80337	0.91191	1.14832	1.03199	1.05804	0.613009	0.863416	1.24613	0.637304	0.936148	0.00820968
ENSG00000163785	RYK	1430	1225	1414	1261	1430	1308	1452	1548	1767	2209	1337	1368	1146	1788	1296	1674	983	1709	1717	1829	12.4311	10.6898	10.8335	11.004	11.8198	11.6575	11.38	11.0315	15.9899	14.941	10.3892	12.3108	10.9271	15.7863	10.366	15.4806	9.72781	14.4279	15.6529	14.4047	0.458233	0.0498821
ENSG00000163781	TOPBP1	722	525	881	694	624	598	654	792	942	884	615	682	599	730	723	830	484	630	692	844	3.11265	2.18364	3.40461	2.97503	2.69584	2.5754	2.64036	2.87657	4.3488	2.85709	2.30546	3.19206	2.981	3.34928	2.86035	3.98389	2.28177	2.8715	3.25133	3.60698	0.710325	-0.027248
ENSG00000163788	SNRK	1471	1605	2326	2175	2187	2096	1776	2496	2723	2322	1956	1769	1770	1411	2185	2188	1208	1414	1915	2117	7.2481	7.94046	10.113	10.7653	10.1182	10.532	7.9294	10.0114	13.967	8.92618	8.55462	9.07486	9.5293	7.08	9.90509	11.5584	6.76366	7.02952	9.71846	9.39089	0.115049	-0.174807
ENSG00000182195	LDOC1	889	817	685	584	659	800	967	1072	752	1139	808	791	767	524	675	407	551	668	673	912	16.3366	15.1626	11.1555	10.5707	11.3654	15.0185	15.9598	15.995	14.4428	16.3692	13.2667	14.9738	15.2915	9.7584	11.47	7.99034	11.5698	11.9844	12.7781	15.1676	0.104601	-0.215229
ENSG00000182197	EXT1	1077	1012	975	905	937	839	972	1023	1189	1867	866	795	759	1370	921	1304	612	1221	1050	1377	3.30337	3.20859	2.66125	2.7373	2.69913	2.63259	2.67954	2.54888	3.8162	4.4789	2.37209	2.5117	2.52471	4.25847	2.61356	4.27769	2.14449	3.65887	3.33102	3.8262	0.987583	-0.00159555
ENSG00000182196	ARL6IP4	4772	3955	4068	3897	3399	3086	4448	4723	3794	6950	4867	4303	3455	4829	4190	3646	3165	4719	4320	4611	108.477	86.0826	80.7067	85.6323	76.6446	73.7308	90.1507	85.533	90.5043	122.843	97.5704	98.8111	88.0981	109.944	92.1404	84.1014	70.0698	104.482	102.62	92.3427	0.474552	0.0577998
ENSG00000188130	MAPK12	2127	2068	2752	2457	2122	1949	2210	2940	1871	2753	2982	2361	2666	2052	2335	2157	2081	2402	2164	2598	29.5869	28.9452	33.6032	32.891	26.9131	27.499	27.4954	33.0203	27.0169	29.9029	37.1855	33.0746	39.7803	28.696	29.875	31.9832	32.689	32.456	31.2058	32.232	0.215366	0.122277
ENSG00000182199	SHMT2	1700	1642	1964	1679	1625	1413	1638	2007	1584	2222	1526	1665	1691	1755	1861	1620	1241	1529	1701	1948	17.5428	16.9287	17.7778	16.778	16.2834	14.6991	15.2207	16.6768	16.9674	17.5403	14.2738	17.8798	18.6896	18.1029	17.5425	17.8659	14.5694	16.2519	18.3093	18.6093	0.975055	-0.001824
ENSG00000186866	POFUT2	884	650	782	722	634	584	700	867	783	1073	858	655	659	721	676	1013	567	916	1107	872	6.78516	5.05263	4.68927	5.25178	4.62225	5.04961	4.67639	5.03642	6.36613	5.99032	6.05701	5.08189	5.75468	4.88838	4.86571	8.24704	4.00454	7.26649	8.62876	5.18676	0.0906478	0.141815
ENSG00000186868	MAPT	4266	3585	6576	4715	5512	4812	4981	6960	4409	4133	6508	4253	5317	2638	4033	5359	2796	4249	4977	5014	18.6436	15.6861	23.9485	20.1306	22.0775	21.5365	19.1322	23.1272	19.5661	13.7563	24.0113	18.8302	24.6982	11.4062	14.9754	24.3425	13.8351	17.9183	22.0805	19.8132	0.559805	-0.0870815
ENSG00000015153	YAF2	606	696	846	701	681	670	844	891	796	1281	732	768	747	795	813	774	561	826	636	908	5.40027	6.28136	7.09136	6.3503	4.79695	5.93562	5.82632	6.06127	7.52498	8.55396	5.67356	5.80438	6.95203	7.84249	5.82358	6.49856	5.45074	7.25361	4.85165	7.90042	0.948235	0.00501302
NewGene_216	NewGene_216	220	176	203	174	133	133	169	226	245	286	249	56	204	250	226	259	211	181	334	220	1.69495	1.36092	0.961676	0.854194	0.789924	0.951531	0.832837	1.28997	1.76818	1.13161	1.30006	0.409332	1.26323	1.68373	1.34072	1.66099	1.46289	1.22023	1.91584	1.19243	0.188843	0.258352
NewGene_6989	NewGene_6989	46	39	43	39	20	17	60	51	45	88	16	49	13	56	35	43	32	67	40	47	0.467273	0.455942	0.454865	0.402209	0.34202	0.161927	0.555851	0.494408	0.582773	0.855614	0.26896	0.536518	0.177449	0.671013	0.652184	0.630987	0.546318	0.78402	0.437074	0.559296	0.790857	-0.0704168
NewGene_214	NewGene_214	226	159	195	129	118	107	175	169	146	196	149	213	138	152	163	257	112	120	225	151	1.46416	1.44032	1.35437	1.14252	0.812124	0.733588	1.12239	1.0945	1.0986	1.04055	0.840678	1.93178	1.26727	1.08072	1.10815	1.87287	0.86775	0.88041	1.59109	1.03789	0.392802	0.124038
ENSG00000139737	SLAIN1	167	135	193	189	198	201	143	283	247	243	216	221	116	142	167	163	136	179	205	184	1.75221	1.46699	1.79165	1.76903	2.05163	2.08883	1.30376	2.20748	2.75135	2.10447	1.71193	2.14547	1.11345	1.29052	1.65093	1.89469	1.41848	1.79888	2.51354	1.57947	0.302485	-0.131503
ENSG00000214960	ISPD	113	136	157	135	137	149	153	179	204	150	144	110	108	132	199	136	96	175	131	192	0.517267	0.626743	0.639216	0.610256	0.588133	0.7067	0.63069	0.665816	0.976467	0.537873	0.588121	0.519313	0.54861	0.612966	0.843604	0.665927	0.499847	0.785092	0.621064	0.795199	0.816186	-0.0293142
ENSG00000214967	NPIPA7	549	452	514	313	248	147	211	235	288	485	491	266	340	559	588	557	395	428	534	585	10.6595	8.95768	9.34005	5.99933	4.59288	3.4079	4.52329	5.26817	6.35573	8.27187	8.46227	5.57603	7.14806	10.9862	10.5283	11.7314	8.81783	8.13688	11.1875	10.4488	0.00658989	0.542445
ENSG00000005302	MSL3	829	768	749	695	618	631	667	740	792	1206	620	690	524	901	659	753	411	772	696	1029	9.07471	7.75369	6.582	6.82272	5.92755	6.32988	6.08743	6.06583	8.35636	9.47677	5.58713	7.23186	5.82151	9.32597	6.09975	8.08848	4.81237	7.47642	7.24337	9.34702	0.462333	-0.0623817
ENSG00000074201	CLNS1A	2040	1933	2103	1743	1925	1785	1991	2282	2143	2631	2144	2142	1988	2252	1975	1623	1552	1952	2046	2390	18.5906	17.053	17.6627	16.1292	18.0983	16.7196	16.3	16.8434	20.1003	18.9364	17.0798	19.6736	19.3829	21.1587	19.5872	15.364	15.8556	17.9523	19.5052	19.192	0.486236	0.0428327
ENSG00000101255	TRIB3	70	51	60	62	105	86	103	88	121	143	153	46	58	51	83	53	37	59	106	100	0.703013	0.52098	0.537712	0.613673	1.00269	0.888697	0.979807	0.720383	1.29533	1.12854	1.38234	0.472415	0.630342	0.516221	0.773032	0.572404	0.423069	0.582819	1.10617	0.912063	0.415729	-0.186121
ENSG00000119383	PTPA	3477	3133	3585	3037	3215	2766	3167	3859	2766	3907	4520	3432	3268	2778	3483	3146	2885	3822	3975	3993	39.9285	39.0422	36.6525	35.9527	36.9213	32.3002	34.2606	38.1513	34.6667	36.0792	50.0177	44.1893	46.2135	33.3671	39.271	39.5233	40.6177	47.8977	48.7255	43.5048	0.0342886	0.178203
ENSG00000153339	TRAPPC8	1161	1195	1863	1400	1471	1297	1176	1611	1601	1596	1343	1320	1376	1323	1527	1627	988	1307	1409	1618	4.73089	4.93139	6.79455	5.70035	5.63725	5.44958	4.32001	5.36097	6.82969	5.09558	4.89282	5.57589	6.11222	5.47077	5.76952	7.09548	4.60453	5.24745	5.94653	6.00008	0.863153	0.0137472
ENSG00000187118	CMC1	1052	1192	1143	1170	1125	1022	1222	1217	1100	2142	1264	1156	1025	1298	957	746	1191	1404	923	1098	9.31635	9.89541	7.13816	10.1047	7.57214	8.16228	9.99323	8.34361	7.7042	14.888	8.11603	8.33344	7.44565	11.8521	5.76801	5.10807	11.5007	12.97	7.91169	7.61302	0.709566	-0.0489124
ENSG00000180329	CCDC43	1075	1142	1301	1111	1261	1078	1121	1288	1217	1542	1320	1111	1076	1069	1237	1105	847	1099	1207	1293	13.1078	14.053	14.0479	13.3781	14.4385	13.4189	12.2749	12.7988	15.5529	14.7048	14.3876	13.9486	14.2405	13.216	13.965	14.3902	11.8259	13.0744	15.2228	14.2811	0.718264	-0.0215089
ENSG00000144736	SHQ1	377	423	481	472	461	392	393	499	453	574	429	418	357	331	388	445	228	408	482	498	3.31805	3.75918	3.75102	4.10416	3.81079	3.53099	3.10746	3.56855	4.16866	3.95566	3.37616	3.79593	3.40657	2.95156	3.16486	4.19236	2.29669	3.50779	4.38482	3.96903	0.0931193	-0.124123
ENSG00000196345	ZKSCAN7	157	141	140	116	125	125	126	119	172	253	143	89	124	177	113	205	81	149	178	139	1.24623	1.03765	1.15134	1.07781	1.40017	0.998437	1.11888	0.97831	1.70951	2.35355	1.06608	0.870671	1.02974	2.20114	0.972675	1.74015	0.854037	1.85618	2.13101	1.37763	0.985443	-0.00251045
ENSG00000213533	STIMATE	623	583	555	490	521	463	510	569	759	797	569	526	473	663	557	753	388	560	675	759	3.92295	3.75719	2.78141	3.14636	2.85037	3.18572	3.53674	2.77811	5.59778	3.74864	3.36618	3.6359	2.96121	4.31864	3.16362	5.35893	2.81628	3.78742	4.87835	4.7225	0.284013	0.0783753
ENSG00000112406	HECA	1139	1028	1338	1163	1216	1209	1040	1331	1491	1889	1068	1164	951	1182	1135	1187	845	1200	1145	1477	5.14713	4.69237	5.35881	5.18628	5.16043	5.58714	4.22328	4.88479	7.05161	6.67544	4.31117	5.42154	4.66085	5.4153	4.7459	5.73707	4.36546	5.29682	5.35398	6.0457	0.0859541	-0.102501
ENSG00000150627	WDR17	123	36	100	113	103	92	46	64	57	130	105	43	62	88	63	146	61	120	100	194	0.639041	0.194912	0.46132	0.579409	0.506344	0.483897	0.222197	0.278688	0.320874	0.521669	0.483546	0.23791	0.347786	0.456152	0.29848	0.811873	0.353288	0.605385	0.531408	0.921871	0.394099	0.213279
ENSG00000006652	IFRD1	1075	1164	1113	1132	595	1090	1078	1013	1401	1276	1058	1096	789	1356	1081	1421	755	934	1151	1242	11.5619	13.077	10.7612	12.0947	5.80529	12.0531	10.5738	8.89346	15.9056	10.9677	10.2953	12.2629	9.24028	15.1743	10.786	16.8078	9.22786	9.85074	12.7105	12.4101	0.643779	0.0512752
ENSG00000090470	PDCD7	921	704	769	744	671	753	880	923	855	1110	886	830	724	813	852	878	509	960	927	1101	8.18225	6.32218	6.05603	6.55724	5.59797	6.85826	7.03241	6.66402	7.95112	7.7257	7.03756	7.60709	6.98814	7.32292	7.01251	8.36424	5.1663	8.33039	8.53673	8.87998	0.118822	0.0903265
ENSG00000155275	TRMT44	119	118	147	138	100	81	106	117	139	169	102	135	108	169	125	150	95	110	135	147	1.08011	1.09777	1.1886	1.23877	0.858731	0.759696	0.885933	0.858216	1.31227	1.20947	0.826683	1.26869	1.07282	1.56768	1.05625	1.46323	0.993021	0.966541	1.27717	1.21086	0.244958	0.123394
ENSG00000164172	MOCS2	2278	2630	2559	2615	2385	2387	2872	2685	2250	3794	2512	2276	2136	2924	2138	2081	2221	3150	2487	3216	27.4236	32.6688	27.2959	31.6351	26.7136	27.8893	35.4831	26.5214	27.7701	37.6392	25.471	29.241	29.3016	36.3661	23.1741	26.93	30.1133	36.1766	29.1971	33.8226	0.959936	0.00453059
ENSG00000164171	ITGA2	149	127	128	134	104	97	83	109	182	241	90	118	121	158	102	251	64	176	202	274	0.479221	0.41128	0.365155	0.424048	0.313559	0.31699	0.238579	0.284477	0.61392	0.605551	0.258607	0.391166	0.42143	0.516398	0.303503	0.863479	0.2335	0.552663	0.673864	0.79944	0.199452	0.248381
ENSG00000198612	COPS8	3452	3373	3640	2944	3415	3177	3747	4027	3565	4574	3954	3541	3174	3548	3487	3079	2705	3759	3314	4336	24.6388	22.685	20.6499	19.0598	21.8903	22.1405	22.393	23.0203	24.3732	23.1652	23.214	23.9176	22.5902	24.2769	23.1266	21.9685	21.4121	24.6355	24.2609	25.8226	0.549374	0.0340029
ENSG00000100612	DHRS7	1626	1425	1198	1331	1513	1383	1484	1572	1702	2164	1287	1298	1115	1748	1068	1272	1133	1456	1328	1709	31.0958	26.2707	20.2336	25.0848	26.976	24.2375	25.254	24.2443	33.5407	32.441	21.8171	24.6037	22.7523	33.4949	18.8696	25.4733	24.144	27.1247	26.0584	29.6483	0.13806	-0.123307
ENSG00000100614	PPM1A	3869	4000	5230	4208	4151	4321	4087	5073	4856	5544	4657	4201	4452	3996	4420	4286	3231	3985	4158	5218	13.1145	13.6483	15.2884	14.271	13.1478	15.0642	12.5972	13.9813	17.0816	14.7879	13.9468	14.6482	16.2514	13.9795	13.6098	15.253	12.3949	13.1017	14.5295	16.1981	0.81472	-0.0145024
ENSG00000161526	SAP30BP	1518	1330	1481	1428	1089	1060	1169	1462	1320	1793	1530	1433	1154	1438	1317	1377	980	1429	1647	1594	19.0486	16.4512	15.967	15.1113	10.3176	12.9014	12.7737	13.3497	16.9151	15.9919	16.3576	18.1979	12.6817	19.1051	14.9818	18.09	13.6506	16.9586	19.041	17.7965	0.0992262	0.0982731
ENSG00000160691	SHC1	2046	1786	1914	1755	1973	1705	1929	2331	2240	2947	1925	2039	1723	2074	1783	2244	1179	2224	2262	2970	16.4363	14.9713	13.3953	13.93	14.3132	13.625	13.7874	15.2375	18.8871	18.1541	13.4723	16.6402	14.9762	16.7982	13.6899	19.4041	11.1456	16.5889	18.3271	20.9995	0.421477	0.0473255
ENSG00000160695	VPS11	1126	1005	1234	1089	1047	879	1082	1296	1204	1357	1033	961	945	1101	1047	1252	725	1042	1184	1420	8.78984	8.29856	8.62041	8.70211	8.0398	7.18179	7.70177	8.18246	9.8428	8.17054	7.32704	7.82592	7.89799	9.2702	7.64085	10.9395	6.65281	7.96263	9.45668	10.1879	0.732775	-0.0149245
ENSG00000243667	WDR92	340	338	326	336	260	346	343	360	302	394	278	353	372	370	255	297	210	321	349	438	3.45312	3.6613	2.93469	3.40921	2.53161	3.51458	3.12403	2.88806	3.36869	3.10646	2.59378	3.75442	4.03841	3.95464	2.46963	3.38767	2.49284	3.11959	3.63411	4.00588	0.874088	0.0151416
ENSG00000243660	ZNF487	11	50	14	55	79	8	72	52	76	97	51	81	62	91	10	22	60	6	72	68	0.450666	0.861772	0.548275	0.648328	0.924221	0.331414	0.773213	0.523673	0.944769	0.992328	0.550402	0.995259	0.806729	1.25954	0.374253	1.04222	0.992212	0.259474	1.15189	0.868769	0.745685	0.148539
ENSG00000204580	DDR1	1698	1602	2141	1841	1795	1568	1736	2592	1802	1924	2167	2023	1719	1291	1910	2610	1020	1730	2036	2754	11.2532	10.6301	12.6237	12.1869	11.3127	10.6137	10.6544	13.9631	12.8165	9.92054	12.7992	13.825	12.6003	8.74548	11.6563	19.0895	7.74316	11.2206	13.8888	16.519	0.396933	0.091159
ENSG00000178718	RPP25	287	244	88	116	118	90	324	349	161	418	68	182	113	249	106	186	85	327	206	173	2.38442	2.04863	0.648582	0.952169	0.920855	0.765726	2.41776	2.35593	1.39732	2.71558	0.505676	1.55466	1.01431	2.09825	0.809375	1.64989	0.801136	2.65115	1.76624	1.30152	0.322848	-0.280296
ENSG00000178719	GRINA	2949	2377	2605	2098	2409	2134	2639	3067	2507	3688	2603	2474	2050	2274	2047	2213	1536	2512	2592	3481	42.91	34.011	32.9419	29.9769	32.2077	30.1335	34.375	34.4071	37.0764	40.497	32.5892	35.1761	31.4397	31.9162	27.0115	33.6963	25.7121	35.0951	39.4704	45.2402	0.177581	-0.0873704
ENSG00000119333	WDR34	1020	1091	1036	886	763	698	878	1023	858	1380	1483	924	791	1217	1242	1096	767	1079	910	1294	15.0006	16.1654	13.3799	12.9389	10.4073	10.4109	11.5171	12.0817	13.0863	15.7187	19.2459	13.8392	12.4996	17.9864	16.7264	17.1333	12.7483	15.3779	13.7931	17.0975	0.0144349	0.241965
ENSG00000151229	SLC2A13	195	259	303	245	197	232	277	341	423	533	149	195	179	360	208	246	181	246	217	309	0.714245	0.959608	0.972229	0.873241	0.68081	0.858788	0.90682	1.00211	1.61489	1.50907	0.481346	0.72526	0.702203	1.34712	0.710311	0.976129	0.747062	0.8673	0.81334	1.02829	0.0446413	-0.296868
NewGene_11511	NewGene_11511	26	30	83	70	66	99	60	120	40	70	75	54	28	28	52	45	13	58	61	67	0.666307	0.849938	1.98014	2.17574	1.74053	3.38683	1.49524	3.12424	1.73974	1.95563	1.76734	1.6318	0.649962	0.974238	1.13466	1.34162	0.311233	1.68296	2.16696	1.60917	0.121008	-0.435748
ENSG00000177479	ARIH2	3339	3011	4249	3314	3142	2796	3531	4516	3856	4099	3757	3683	3424	3155	3660	4116	2490	3158	3754	4260	20.0646	17.3782	22.7208	24.4697	16.7633	19.3074	18.8149	22.4696	23.4044	18.7422	18.7483	22.2491	21.7913	18.3826	19.1833	26.832	16.8402	18.4903	22.2868	21.2536	0.343521	0.0575977
ENSG00000124535	WRNIP1	2511	2501	2836	2421	2353	2227	2598	3168	2366	2813	2808	2459	2619	2321	3044	2930	1600	2453	2536	3035	24.3547	24.2278	24.2545	21.9359	21.17	21.7623	22.4889	23.8185	27.2331	21.017	23.8429	24.4115	26.6759	22.1478	26.134	30.1942	17.8691	23.6658	25.1213	26.6671	0.366743	0.0641707
ENSG00000124532	MRS2	2013	2123	2845	2218	2218	2190	2554	2922	2403	2516	2571	2292	2368	2139	2458	2081	2420	2431	2079	2511	16.8013	17.8637	20.4331	18.3602	16.7507	18.4577	19.4318	19.2056	20.4446	15.6854	18.5424	19.1481	21.1231	18.1139	18.2653	18.685	22.4322	19.6353	17.8976	18.3675	0.604428	0.0518465
ENSG00000205981	DNAJC19	2556	2813	2478	2488	2400	2365	3119	2820	2411	4988	2715	2264	2490	3083	2408	1848	2601	3048	2276	2387	49.3078	54.0328	40.581	46.1531	41.73	44.7182	51.5787	42.7192	46.9213	74.5937	44.8158	43.5443	49.8528	59.1269	41.7513	37.7665	55.9741	55.8103	43.946	40.5177	0.606652	-0.0642979
ENSG00000129480	DTD2	277	222	184	168	174	154	223	252	211	335	166	194	171	199	171	149	159	214	218	214	3.15574	2.5549	1.92218	2.10704	2.09029	1.70169	2.67288	2.40816	2.83249	3.46963	1.88061	2.32066	2.39534	2.23501	1.87447	2.13431	2.40357	2.56714	2.43041	2.18589	0.145035	-0.154709
ENSG00000129484	PARP2	762	859	796	795	762	631	782	839	781	1042	720	806	794	821	804	705	641	806	769	906	10.2775	11.5716	9.4337	10.449	9.44861	8.54588	9.39692	9.073	10.7135	10.7276	8.60096	10.9864	11.4864	11.2273	10.0207	10.1277	9.78948	10.4987	10.8458	11.0739	0.663283	0.0287925
ENSG00000084207	GSTP1	6431	6179	4222	4199	4829	4220	5706	5730	5393	10545	5482	5156	4197	7156	4974	4372	4552	6693	5707	6785	213.941	202.086	126.848	140.145	153.944	146.104	174.643	158.423	191.018	277.073	166.889	173.607	135.477	246.267	147.323	159.082	177.215	222.745	187.254	207.824	0.769136	0.0343363
ENSG00000092531	SNAP23	1471	1531	1640	1710	1768	1705	1569	1835	1722	2345	1696	1591	1495	1652	1383	1494	1097	1772	1738	2071	14.2333	14.9327	13.9736	16.455	15.9806	16.998	13.7289	14.4475	17.4754	17.5937	14.5132	16.0306	15.8175	16.3816	12.1365	15.5052	11.9756	16.7023	17.4579	18.7497	0.440688	-0.0485974
ENSG00000205670	SMIM11A	640	636	484	488	546	478	641	620	579	1075	664	454	439	718	566	588	680	699	553	554	17.9276	17.925	12.2261	13.6332	14.3196	13.4953	16.2411	14.1916	17.2109	24.0092	16.7317	13.0566	13.4062	20.719	14.7407	17.7498	21.4331	19.4151	16.1497	14.1139	0.710523	0.048877
ENSG00000249437	NAIP	319	281	187	188	164	211	150	158	399	326	354	361	135	368	279	387	282	313	157	346	1.31602	1.41702	0.777635	0.866292	0.697531	0.925827	0.557224	0.608032	2.11328	1.13269	1.47099	1.66631	0.686331	1.70226	1.14951	1.87145	1.32742	1.32621	0.670754	1.33124	0.050222	0.402718
ENSG00000205678	TECRL	769	1082	329	302	341	349	268	398	507	691	477	638	383	671	725	690	431	697	599	664	5.84881	8.23363	2.22889	2.31497	2.45641	2.73627	1.86519	2.49698	3.98517	4.11606	3.25326	4.89059	3.09663	5.19734	5.08668	5.5387	3.73041	5.21268	4.77027	4.51797	0.152796	0.309444
ENSG00000028277	POU2F2	66	30	21	20	19	15	39	48	84	122	42	29	23	73	23	48	34	101	28	75	0.239572	0.108916	0.067267	0.127068	0.062688	0.054104	0.123556	0.141097	0.333413	0.39159	0.135892	0.106746	0.08748	0.324056	0.077236	0.185915	0.142071	0.359781	0.139061	0.282722	0.635267	0.165047
NewGene_3790	NewGene_3790	146	159	93	95	121	107	6	0	9	4	132	126	98	0	0	0	73	70	46	126	2.06978	2.27259	1.12164	1.2297	1.67565	1.6833	0.059352	0	0.114971	0.031329	1.7977	1.90592	1.53353	0	0	0	1.18796	0.830505	0.641674	1.77332	0.888712	-0.14441
NewGene_3797	NewGene_3797	827	542	516	471	354	308	242	298	528	772	392	949	238	639	304	643	385	339	721	241	6.83322	4.43638	3.71377	3.77635	2.54895	2.61293	1.94029	1.88681	4.26518	5.32593	3.71266	7.87627	2.34839	5.1974	2.10454	5.75496	3.6221	3.54864	6.14724	1.87887	0.736344	0.0856751
NewGene_3796	NewGene_3796	93	83	59	61	78	60	111	68	107	200	44	52	62	92	65	51	44	79	98	90	1.33319	1.20186	0.759575	0.849966	1.06094	0.90263	1.46593	0.778578	1.60653	2.32587	0.534965	0.762725	0.973193	1.36305	0.853787	0.75743	0.694192	1.0809	1.44452	1.1921	0.0717466	-0.349211
NewGene_7489	NewGene_7489	134	105	6	25	33	26	28	31	22	94	64	107	27	109	44	98	70	67	94	132	2.49799	1.94129	0.100619	0.437834	0.566476	0.447905	0.443443	0.447338	0.41787	1.37904	1.08678	2.01033	0.562723	2.01733	0.736149	1.94474	1.44142	1.21135	1.8297	2.19855	0.0590168	0.747993
ENSG00000162994	CLHC1	56	63	72	68	55	76	81	112	111	118	89	118	114	49	94	77	59	47	136	134	0.896533	1.01456	0.970124	1.16464	0.814541	1.26228	1.1438	1.04327	1.49243	1.38795	0.968943	1.80196	1.84451	0.66213	1.33119	1.14344	1.65422	0.943411	2.0306	2.21798	0.183795	0.260379
NewGene_7480	NewGene_7480	487	557	506	423	553	441	607	560	574	843	593	643	414	523	607	471	421	571	519	578	6.27025	8.07747	5.42804	4.78429	7.70676	5.85184	7.0693	5.95881	8.37805	7.51014	7.7452	7.9488	5.76074	7.76499	8.06588	6.38464	6.88137	6.36358	6.77543	6.66552	0.74443	0.0293121
ENSG00000162999	DUSP19	222	207	214	221	216	225	166	212	230	342	229	209	159	240	212	196	124	207	227	284	1.08474	1.20181	0.926798	1.07976	1.02136	1.48584	0.753181	0.941522	1.22588	1.50852	1.20785	1.11321	0.842766	1.22598	1.0711	1.15184	0.736028	1.01263	1.15116	1.28997	0.588551	-0.0490082
ENSG00000162998	FRZB	2193	1901	5890	5065	3549	3728	1397	2051	4167	5888	3590	2439	4755	2734	3549	3326	2517	3014	3595	9267	17.6007	15.4119	41.8926	40.104	26.7624	30.5935	10.0756	13.3673	34.9843	36.9579	25.7449	20.173	41.4119	22.2356	26.3481	28.5389	23.0976	23.6184	29.85	67.3645	0.503589	0.164993
ENSG00000136305	CIDEB	212	146	127	182	123	124	142	102	122	256	74	105	81	249	100	154	126	177	170	185	2.3814	1.69672	1.30104	2.01908	1.34945	1.44261	1.45298	0.938622	1.45435	2.30388	0.755132	1.23489	0.976637	2.87792	1.10122	1.91203	1.66663	1.95677	1.92332	1.92336	0.824359	-0.0446152
ENSG00000158092	NCK1	911	857	949	794	823	761	832	943	800	1318	864	859	724	1021	799	709	559	991	890	1151	10.9734	9.72603	9.99273	9.05447	8.9364	9.00892	9.00519	9.33004	10.1332	12.5168	8.93389	9.89751	9.20376	12.5232	9.09579	8.58866	7.48852	11.9272	11.1912	12.3607	0.997041	0.000262343
NewGene_2030	NewGene_2030	2885	2592	3063	2637	978	1610	3570	3380	3983	2388	1845	5266	1773	1675	3560	6784	3091	2672	2971	3048	8.25437	7.46873	7.73058	7.37699	2.60441	4.66767	9.15968	7.78505	13.202	5.46726	4.69977	15.3915	5.87198	4.81461	9.34171	20.571	10.0592	7.39994	8.7157	7.88988	0.144832	0.352372
ENSG00000005844	ITGAL	161	67	152	161	97	75	114	71	119	147	82	84	53	107	60	100	65	189	59	106	0.836472	0.326756	0.691529	0.797643	0.464408	0.369446	0.528793	0.280259	0.601064	0.603378	0.356154	0.418156	0.282669	0.526954	0.267969	0.517777	0.362474	0.895198	0.292489	0.464621	0.174841	-0.302398
ENSG00000122176	FMOD	4617	3036	1140	1201	1549	1708	1509	1607	2872	7756	1485	3516	1692	6497	1398	6381	1043	4344	5706	13529	35.3978	23.5071	7.74018	9.08184	11.1521	13.3907	10.3941	10.0038	23.036	46.511	10.1694	27.7747	14.0713	50.4864	9.91363	52.3084	9.14067	32.5233	45.2639	93.9487	0.0521682	0.789359
ENSG00000121486	TRMT1L	1571	1565	2304	1684	1585	1606	1289	1914	1686	1844	1665	1630	1756	1372	1576	1565	1198	1377	1551	2049	9.08738	9.15607	11.8055	9.60897	8.61339	9.5026	6.69424	8.98595	10.2123	8.37206	8.59685	9.71866	11.0257	8.0478	8.43814	9.68336	7.93076	7.78097	9.27885	10.7294	0.62349	-0.0451108
ENSG00000126709	IFI6	1738	1321	1276	1306	1261	1278	1151	1364	2064	3741	1275	1363	1213	1474	1505	1315	923	1662	1274	1819	52.8337	40.5086	34.3062	39.0744	36.0031	39.6543	31.4373	33.6438	65.3762	88.9241	34.6209	42.653	39.9437	45.3146	42.257	42.8078	31.9033	49.3608	40.032	50.0459	0.269624	-0.149043
ENSG00000144868	TMEM108	238	201	190	123	112	133	89	143	215	294	204	148	176	241	190	361	108	203	257	293	2.19822	1.40848	1.57771	1.05422	1.11758	0.920635	0.784299	0.783638	1.85401	1.86933	1.78844	1.02829	1.46691	2.18219	1.78063	3.16477	1.21518	1.48935	2.27006	2.04704	0.0271427	0.391261
ENSG00000126705	AHDC1	1914	1852	2505	2196	1688	1693	2055	3153	2084	2088	1743	2285	1903	1165	1953	2433	1074	1667	2268	2485	7.93384	7.66979	9.04698	9.11298	6.64808	6.96027	7.64501	10.6849	9.03161	6.74362	6.47446	9.64851	8.30574	4.7172	7.13533	10.6854	4.83984	6.80442	9.45125	9.15861	0.394064	-0.102895
ENSG00000145012	LPP	2259	2063	1868	1676	1787	1865	1789	2095	2081	2389	1417	1722	1604	2416	2264	2667	1086	2054	2211	2676	3.2667	2.90113	2.29724	2.35404	2.39131	2.64973	2.38976	2.37041	3.03268	2.59364	1.75717	2.49155	2.41815	3.39938	2.90796	4.25655	1.72807	2.79754	3.19521	3.46315	0.508991	0.0634613
ENSG00000106333	PCOLCE	4980	3400	1473	1510	1962	1548	2708	2308	2277	6081	1662	2709	1269	5842	1558	2897	1553	4210	4488	4190	74.2441	51.2064	19.4614	22.2062	27.4758	23.6005	36.2824	27.9415	35.5087	70.915	22.1413	41.6147	20.5177	88.2878	21.4914	46.1818	26.475	61.2992	69.2362	56.5888	0.509459	0.173659
ENSG00000204209	DAXX	986	876	869	856	800	711	881	923	948	1425	925	784	640	976	748	839	588	889	1071	1078	9.57679	8.63148	7.53053	8.20453	7.30197	7.06065	7.77449	7.28763	9.64345	10.8321	8.05731	7.85215	6.74759	9.61911	6.72292	8.7277	6.53277	8.49029	10.7911	9.48389	0.495076	-0.0470133
ENSG00000158022	TRIM63	1215	1348	2897	2371	1659	1680	1765	2563	1787	1663	1653	1498	2572	1083	1694	1387	1433	1139	1399	1465	17.4126	19.5163	36.8069	33.5336	22.3419	24.6265	22.7366	29.8367	26.7953	18.6484	21.1784	22.1287	40.0101	15.736	22.4615	21.2494	23.4848	15.9405	20.7498	19.0175	0.268451	-0.20503
ENSG00000081320	STK17B	521	496	579	489	478	447	483	469	633	1015	451	365	348	724	453	667	288	570	472	634	2.49532	2.39979	2.54679	2.38535	2.15079	2.21318	2.22686	1.82503	3.20424	3.96667	1.98352	1.79839	1.80328	3.51692	2.0086	3.42025	1.57423	2.66503	2.33907	2.75065	0.399888	-0.102899
ENSG00000151465	CDC123	1271	1265	1221	1212	1120	1164	1210	1358	1159	1787	1264	1154	1100	1484	1285	1195	1067	1215	1208	1386	21.3303	21.3186	18.5995	19.9006	17.4387	19.5895	18.0005	18.3122	19.9436	23.3629	18.5748	19.6262	19.7022	25.4326	19.5504	21.0978	20.0764	19.5138	20.5838	20.7174	0.589577	0.0351504
ENSG00000173889	PHC3	1647	1425	2142	1711	1439	1547	1594	1831	2147	1899	1548	2124	1612	1655	1557	1931	1304	1518	2001	2309	3.39527	3.03971	3.84321	3.44198	2.91507	3.2658	2.95256	3.04961	4.5928	3.01745	2.80651	4.47393	3.60535	3.4057	2.94047	4.19952	3.42198	3.04106	4.17281	4.23943	0.312762	0.0800644
ENSG00000158321	AUTS2	751	522	505	485	473	502	526	596	618	795	456	636	525	632	623	901	315	661	661	905	3.02234	2.25957	1.76834	2.32528	1.68266	2.34002	2.37383	1.93492	2.64468	2.64161	1.60538	3.15194	2.88589	2.71374	2.28021	4.47385	1.55011	2.53911	2.93003	4.28189	0.0863496	0.181125
ENSG00000033800	PIAS1	1247	1201	1576	1219	1387	1173	1346	1479	1682	1631	1257	1273	1342	1279	1408	1561	941	1404	1441	1709	3.91171	3.80495	4.37007	3.76053	4.07281	3.79912	3.78202	3.76167	5.51967	3.98928	3.51146	4.10089	4.55113	4.05089	4.07369	5.21701	3.36453	4.29549	4.66121	4.83941	0.564977	0.0331252
ENSG00000017797	RALBP1	2522	2387	2673	2222	2077	1931	2345	3090	2578	3591	2118	2077	2057	2840	2248	2689	1564	2577	2750	3120	15.9937	15.185	15.1087	13.974	12.0782	12.2735	13.2645	16.1185	17.4505	17.6978	11.5923	13.322	13.9681	17.8616	12.9422	18.4917	11.1993	15.7655	17.8778	17.3338	0.886489	-0.00806977
ENSG00000159055	MIS18A	119	110	78	62	100	127	80	105	148	222	123	131	73	133	78	120	78	112	156	129	1.91336	1.78812	1.11049	0.98046	1.5123	2.08346	1.14864	1.3728	2.4851	2.78541	1.76078	2.16966	1.27256	2.16183	1.15638	2.06269	1.43038	1.74856	2.58611	1.87487	0.730141	0.0583418
ENSG00000104524	PYCR3	161	151	120	103	91	76	122	154	138	193	136	143	96	182	139	167	95	195	181	164	1.73564	1.44322	1.1516	1.10191	0.806025	0.76194	1.18912	1.35526	1.45315	1.50212	1.16655	1.44091	0.980417	1.89279	1.27136	1.86507	1.02527	1.89461	1.82656	1.45346	0.0309038	0.270493
ENSG00000104522	TSTA3	440	388	406	418	398	353	301	378	436	654	469	412	342	449	512	453	350	530	458	491	8.50227	7.34398	6.88056	8.00646	7.10211	6.7149	5.25171	6.39401	8.81675	9.89754	8.09325	8.08665	7.1237	8.62843	9.25461	9.37608	7.73233	9.9528	9.13645	8.62659	0.04046	0.179352
ENSG00000145908	ZNF300	200	184	172	169	139	92	154	151	213	279	132	185	98	269	142	240	129	239	273	183	1.4327	1.20169	1.07914	1.18332	0.847573	0.732976	0.958728	0.756166	1.36315	1.49847	0.884507	1.27009	0.822852	1.85103	0.802463	1.67534	0.952654	1.75528	1.84666	1.13074	0.266931	0.183104
ENSG00000145901	TNIP1	3571	3039	3431	3110	2939	2549	3541	4163	3187	4496	3413	2750	2661	2952	2890	3313	2032	3458	3479	4115	32.223	27.3068	28.0549	28.0638	25.1527	23.8085	30.2031	30.6896	32.1267	31.8432	26.9888	26.2939	26.1591	27.0444	24.2153	32.4003	20.4981	31.0735	33.1727	33.8444	0.245064	-0.0628274
ENSG00000145907	G3BP1	4209	3834	5030	4346	4565	4280	4093	5364	5111	5427	4601	4506	4373	3915	4638	4570	3252	4200	4721	5663	12.1668	11.1408	22.839	12.0668	20.8105	22.4296	9.62682	20.1574	15.9323	14.9281	18.9309	14.5912	24.7606	13.1131	21.3893	13.7999	9.5705	19.9571	13.4285	13.8033	0.836639	0.011708
ENSG00000129103	SUMF2	1604	1271	1477	1462	1335	1344	1241	1614	1645	1976	1552	1580	1169	1518	1517	1305	939	1321	1613	1879	23.5725	20.0306	18.4398	21.5114	18.7174	17.72	17.4767	20.6117	24.3546	23.7292	17.3221	20.4351	17.6961	23.5425	19.1567	22.3732	14.9177	20.1191	25.8667	24.9314	0.873276	0.00977603
ENSG00000142168	SOD1	6857	7061	6653	6661	6135	6490	8204	8116	7394	11541	7986	6887	6640	7717	6695	5875	6115	8590	6236	8227	180.135	187.365	154.89	172.634	151.412	174.348	193.707	173.157	203.213	237.143	187.465	186.447	189.276	205.489	162.725	165.016	183.713	220.371	169.509	195.758	0.894678	0.0111762
ENSG00000082146	STRADB	2696	2877	2769	2308	2429	2152	3876	3583	2383	2835	2488	2490	2064	2174	2180	1721	2229	2805	1769	2469	30.1461	32.6429	27.7662	25.2748	25.5643	24.6666	39.071	32.2648	27.7066	24.6665	25.3671	28.7627	25.2734	24.8437	22.4024	20.561	28.6898	30.7402	20.388	24.9614	0.0692716	-0.229764
ENSG00000142166	IFNAR1	1630	1445	1800	1599	1491	1478	1315	1583	1926	1975	1250	1339	1323	1612	1376	1613	1097	1506	1710	1575	6.73782	6.03156	6.59238	6.51847	5.79069	6.24661	4.88463	5.31016	8.32572	6.38542	4.61493	5.70392	5.93346	6.75065	5.25964	7.12989	5.18414	6.07805	7.31082	5.89647	0.111941	-0.103244
ENSG00000083896	YTHDC1	2103	1970	2266	1941	1707	1700	1819	2402	1982	2604	2049	2033	1844	2034	2014	2278	1443	1813	2238	2304	10.4063	10.8539	10.7062	11.2767	8.62404	8.81223	9.09919	10.7805	11.0019	11.307	10.2068	10.3906	10.5228	11.1169	9.23969	13.416	8.37127	8.6323	13.347	11.2436	0.335029	0.0422039
ENSG00000128274	A4GALT	1282	1084	901	812	1042	790	1131	1187	1020	1985	905	885	681	1194	806	885	633	1153	1178	978	15.1605	12.9987	9.49099	9.54716	11.7087	9.618	12.1072	11.4475	12.5563	18.4038	9.63467	10.915	8.76929	14.5371	8.80846	11.2678	8.53848	13.3825	14.4462	10.4803	0.0887435	-0.186754
ENSG00000158050	DUSP2	80	44	20	77	39	27	29	54	37	85	68	67	56	74	51	54	30	43	92	94	1.19292	0.656979	0.26248	1.12942	0.540638	0.410712	0.382412	0.647286	0.580419	0.989028	0.90148	1.0324	0.909044	1.11522	0.70608	0.856311	0.506889	0.621456	1.41974	1.26901	0.0805157	0.417403
ENSG00000128272	ATF4	6861	6437	5589	6023	5089	4565	6927	7353	6612	11305	6011	5805	5136	7061	6136	5919	4985	6634	6443	8048	101.594	109.712	76.0882	84.8346	80.6157	78.0642	96.0822	82.4207	116.558	149.679	91.2231	99.5588	94.2987	96.739	94.9974	86.8877	81.384	107.11	112.129	122.932	0.895523	-0.0103904
ENSG00000176463	SLCO3A1	763	821	1257	1063	1013	914	1045	1327	1030	1039	771	815	816	672	809	866	679	657	781	981	4.53504	5.10324	6.95044	6.11115	6.26992	6.04045	5.81544	7.36962	6.40439	4.91613	4.11529	5.04363	5.31278	4.00542	4.40781	5.63684	5.27022	3.80424	4.44721	5.19317	0.00146567	-0.313879
NewGene_4112	NewGene_4112	57	32	39	36	42	35	38	18	46	88	14	28	23	51	29	36	36	63	51	47	0.837254	0.467313	0.628507	0.515919	0.578827	0.588022	0.494826	0.209176	0.69974	1.00455	0.171231	0.424388	0.360501	0.754302	0.395236	0.555015	0.606703	0.904089	0.774598	0.620746	0.689146	-0.101876
ENSG00000132434	LANCL2	516	506	631	538	534	428	546	763	630	678	696	718	481	480	568	703	314	601	626	846	3.00287	2.97533	3.25533	3.08894	2.92413	2.54816	2.86002	3.61015	3.84081	3.08836	3.62496	4.30788	3.03839	2.83106	3.05958	4.38185	2.09193	3.44456	3.77158	4.4632	0.175145	0.121794
ENSG00000132436	FIGNL1	350	323	358	264	183	243	283	318	424	435	279	348	269	278	257	279	197	223	350	374	2.58523	2.36541	2.37659	1.84524	1.24307	1.77979	1.81287	2.00199	3.34461	2.39461	1.78219	2.74192	2.11492	2.59479	1.66714	2.1994	1.63161	1.63266	2.85665	2.40508	0.478942	-0.0779628
NewGene_4117	NewGene_4117	235	279	263	244	260	205	188	246	310	404	295	245	244	271	250	248	220	242	222	312	4.80685	5.99386	4.67081	4.66972	5.2319	4.21606	3.58821	4.13013	6.72802	6.3982	5.51159	4.8532	5.68767	5.92596	4.68293	5.68917	4.95629	5.11396	4.74857	5.93234	0.680471	0.039654
ENSG00000132432	SEC61G	1101	911	663	975	729	737	1005	812	657	2218	1057	967	883	1192	741	433	915	1291	922	985	59.2556	44.4649	31.926	52.5767	37.228	41.1523	49.1807	35.8937	37.3472	88.2023	51.2027	54.2241	52.2273	64.5262	37.4191	25.2663	55.9465	67.6212	51.7247	48.7301	0.748246	0.0612887
ENSG00000078699	CBFA2T2	801	665	836	705	732	753	694	1004	954	801	768	725	673	664	692	910	460	702	915	987	3.27955	2.8561	2.56757	3.28894	2.66291	3.18345	2.3808	2.90032	4.42395	2.08864	2.90337	3.09963	3.1358	2.23141	2.6446	3.71229	1.70846	2.9124	3.85106	3.01501	0.706664	-0.0291962
NewGene_4118	NewGene_4118	97	71	120	105	80	62	106	156	152	147	79	133	70	108	107	153	84	95	149	105	1.0755	0.819084	1.29813	1.19397	0.870103	0.805399	1.08215	1.49953	1.92918	1.40646	0.824016	1.55134	0.995799	1.22203	1.1479	1.97408	1.0931	1.04622	1.70548	1.05496	0.63837	0.0722382
ENSG00000069275	NUCKS1	11122	10245	11786	9130	10696	10795	11061	12977	12270	15354	11238	11656	10359	11646	11381	11618	7800	11706	12757	14036	43.4487	40.4273	40.8025	35.1885	39.2592	43.1239	38.8378	41.1725	50.1502	46.9153	39.2303	46.9272	43.9139	46.1128	41.1364	48.5326	34.8485	44.6609	51.5663	49.6667	0.142791	0.0551375
ENSG00000143994	ABHD1	188	202	320	293	167	157	314	323	191	220	120	128	120	143	220	114	209	98	135	162	3.70854	4.09992	5.21349	6.27482	3.37437	3.54225	5.98864	5.01403	4.14723	3.38232	2.23269	2.84715	2.65242	3.13556	3.86943	2.48037	4.62301	2.14733	2.51166	2.66547	0.00304922	-0.600714
ENSG00000143995	MEIS1	140	141	63	85	99	107	94	135	120	135	91	131	70	143	68	92	91	90	107	93	0.809785	0.827789	0.30264	0.468742	0.531316	0.592081	0.476463	0.607572	0.726585	0.645788	0.471297	0.776856	0.447134	0.870319	0.331255	0.582736	0.661858	0.59207	0.639815	0.43623	0.471844	-0.120121
ENSG00000065559	MAP2K4	1280	1372	1710	1354	1516	1495	1607	1745	1597	1671	1589	1563	1488	1277	1419	1491	1033	1589	1512	1638	9.17925	9.33391	10.0665	8.92511	9.504	10.1532	10.8138	9.39631	11.2024	8.91942	9.5437	10.6647	10.8061	8.58947	8.78653	10.7192	8.08133	10.8658	10.4493	9.92076	0.94169	-0.00517479
ENSG00000147677	EIF3H	6724	6718	6698	7135	6565	6257	8047	7577	5735	10840	6885	6875	6582	10012	6151	5343	6465	7858	7064	7397	43.2134	43.6139	38.0476	45.188	39.5372	41.0105	46.5782	39.4433	38.5396	54.3749	39.5095	45.4684	45.8489	65.5304	36.7974	36.6211	47.6323	49.2224	46.9726	42.9814	0.587911	0.0580158
ENSG00000147679	UTP23	679	604	612	496	568	557	522	619	744	991	589	611	497	783	575	585	468	654	628	744	5.12779	4.39349	4.01447	3.78294	3.7937	4.15198	3.33741	3.83002	5.57282	5.49357	3.97886	4.57764	3.97648	5.76725	3.88458	4.59252	4.16392	4.6121	4.75392	5.32854	0.780373	0.0214424
ENSG00000188338	SLC38A3	479	349	405	276	408	384	287	510	409	356	380	458	307	174	508	328	190	350	377	435	4.12856	2.99824	3.05434	2.36831	3.28672	3.44623	2.19524	3.62598	3.65336	2.41243	2.95506	4.06283	2.87084	1.58963	4.13463	3.00767	1.85001	2.95904	3.32217	3.41488	0.599448	-0.0844461
ENSG00000105576	TNPO2	1238	1118	1173	1096	970	974	1260	1526	1320	1331	1027	1237	1068	1118	1063	1509	774	1191	1485	1595	6.45224	5.86997	5.60318	5.81952	4.89945	5.15582	6.35116	6.82553	7.4411	5.32875	4.86331	6.75847	6.19651	6.56688	5.54913	9.33313	4.7394	6.25054	8.11119	7.64412	0.334468	0.0668303
ENSG00000118816	CCNI	13426	12430	11960	10099	11367	10786	11120	12049	10785	17285	11862	12766	11138	15750	11902	10701	9409	12606	12497	14558	123.001	115	97.0545	91.2841	97.7989	100.976	91.5565	89.599	103.323	123.814	97.0421	120.467	110.743	146.204	100.866	104.786	98.6158	112.737	118.394	120.779	0.172297	0.0987724
ENSG00000132294	EFR3A	4397	4441	5568	4438	5419	5000	4609	5638	5320	5655	4916	4437	4143	4207	4988	4941	3542	5491	4292	5987	20.7871	21.2012	23.3451	20.7508	23.9524	24.0824	19.8619	22.0898	26.3483	20.9112	20.6324	21.6581	21.4179	20.0815	21.8871	25.103	19.1691	25.7318	20.8562	25.6095	0.555944	-0.0414728
ENSG00000145293	ENOPH1	934	849	959	827	989	878	836	1096	1005	1557	1160	844	729	947	964	799	728	894	981	1178	12.371	11.0027	11.3688	10.9069	12.0312	11.4391	9.99037	12.087	13.407	16.6719	14.106	11.7509	10.6015	12.7332	12.0262	11.0559	11.1559	11.0395	13.5104	14.0595	0.768302	-0.0231146
ENSG00000119147	C2orf40	666	628	553	517	695	830	849	693	614	807	662	829	535	897	274	549	587	798	704	942	21.3817	20.4179	15.7617	16.3681	20.9854	27.2752	24.5314	18.0974	20.6482	20.3012	19.0094	27.4519	18.6359	29.2118	8.16652	18.8754	21.558	25.0498	23.4044	27.4321	0.811328	0.0391295
ENSG00000133740	E2F5	303	215	297	229	154	219	224	281	346	373	388	466	264	379	313	294	303	291	306	415	1.75899	1.63479	1.57358	1.34055	1.09563	1.49314	1.34554	1.41019	2.20978	1.89956	2.02477	2.57113	1.77434	2.31263	1.92335	1.92383	2.09487	1.61838	2.13067	2.24518	0.000142751	0.466652
NewGene_4801	NewGene_4801	70	47	42	41	20	34	61	50	51	49	49	46	30	34	29	41	15	65	39	63	1.04042	0.593241	0.391857	0.651298	0.299724	0.416171	0.847814	0.491738	0.886498	0.626277	0.508862	0.636621	0.334788	0.433359	0.308763	0.570699	0.262218	1.04174	0.440535	0.772238	0.528245	-0.133147
ENSG00000197150	ABCB8	821	655	835	694	643	551	681	978	828	952	907	856	650	550	853	808	428	643	871	861	5.36696	3.83613	4.1883	3.76016	3.43594	3.11971	3.59898	5.85698	5.24527	4.68207	4.51633	5.11518	3.96035	5.43178	4.42486	5.1251	2.97665	3.58895	5.84311	4.48869	0.727882	0.0323852
ENSG00000115998	C2orf42	346	294	359	297	324	261	268	408	329	465	229	307	273	322	272	350	242	327	311	469	4.43501	3.75104	3.74912	3.40497	3.15346	3.56698	3.0238	3.35986	4.57808	4.61292	2.34712	3.11845	3.8009	3.24841	2.96186	4.25578	3.33763	3.83296	4.1383	4.55001	0.634548	-0.0385756
ENSG00000115993	TRAK2	2405	2120	2492	2176	2130	1947	2366	2664	2550	3200	1814	2029	2148	2633	2394	2499	1472	2460	2072	2630	9.45243	8.44002	8.62128	8.37817	7.799	7.75955	8.29886	8.44932	10.4255	9.75416	6.33796	8.15244	9.08666	10.4564	8.63606	10.4439	6.57297	9.38878	8.37549	9.28544	0.44211	-0.0451115
ENSG00000141639	MAPK4	780	1065	3260	2090	1044	1202	1675	2651	1159	1032	1156	1267	1824	739	1506	802	1287	722	1064	1085	4.1482	5.72073	15.3716	11.1696	5.21581	6.53771	8.00734	11.455	6.4497	4.39019	5.49203	6.96056	10.5895	3.98142	7.42302	4.55865	7.82695	3.75071	5.87235	5.2658	0.161298	-0.360639
ENSG00000066230	SLC9A3	652	555	760	714	703	559	673	839	789	885	691	626	573	566	54	601	595	701	867	867	3.22711	2.75812	3.36057	3.46745	3.2504	2.82662	3.007	3.36637	4.09397	3.41466	3.0437	3.17029	3.05532	2.82735	0.481965	3.22118	3.35949	3.35567	4.44987	3.86478	0.582376	-0.137835
ENSG00000173145	NOC3L	394	438	597	476	482	414	448	598	494	459	529	463	473	455	382	539	372	519	522	599	2.8901	3.24612	3.88425	3.44455	3.32369	3.10312	2.95321	3.56698	3.78925	2.6364	3.46868	3.4981	3.76678	3.3832	2.59256	4.22934	3.11681	3.71698	3.96697	3.98247	0.358733	0.0795893
[truncated: 13,379 more rows]
