# Supplementary material for: Gene expression profiling of extraocular muscles in primary inferior oblique overaction
Source: PeerJ journal article supplement (doi:10.7717/peerj.19474), 2025-05-28
Supplement: TableS1.xls [file TableS1.xls]

## Sheet: Table S1 Differentially express
#ID		P-1_Count	P-2_Count	P-3_Count	P-4_Count	P-5_Count	P-6_Count	P-7_Count	P-8_Count	P-9_Count	P-10_Count	S-1_Count	S-2_Count	S-3_Count	S-4_Count	S-5_Count	S-6_Count	S-7_Count	S-8_Count	S-9_Count	S-10_Count	P-1_Count	P-2_Count	P-3_Count	P-4_Count	P-5_Count	P-6_Count	P-7_Count	P-8_Count	P-9_Count	P-10_Count	S-1_Count	S-2_Count	S-3_Count	S-4_Count	S-5_Count	S-6_Count	S-7_Count	S-8_Count	S-9_Count	S-10_Count	Pvalue	log2FC	regulated
NewGene_5337	NewGene_5337	100	110	41	41	38	28	59	58	29	40	534	579	41	219	462	322	98	943	126	243	0.886174	0.903456	0.297935	0.25173	0.27666	0.205529	0.320077	0.288435	0.220102	0.246959	6.19911	4.71005	0.280863	1.91799	2.7872	2.25348	0.715784	6.39168	1.4555	1.69025	7.68E-12	2.73812	up
ENSG00000139330	KERA	354	213	12	12	29	107	18	24	92	843	68	348	132	1610	147	1874	28	1368	1322	2749	4.15288	2.51831	0.122891	0.132259	0.315937	1.28075	0.185684	0.227329	1.12837	7.73649	0.708803	4.206	1.67034	19.1473	1.58939	23.5189	0.364255	15.6819	16.0514	29.2261	0.000869416	2.58368	up
NewGene_2504	NewGene_2504	29	21	25	0	6	11	0	10	85	217	49	15	43	190	44	112	27	363	459	396	0.391137	0.187678	0.337288	0	0.047806	0.21797	0	0.074699	0.945973	1.69369	0.463051	0.153453	0.562006	2.09884	0.561481	1.44689	0.387475	3.61291	4.88058	3.78615	0.00600263	2.24068	up
ENSG00000164879	CA3	5187	3530	2419	3260	945	1732	637	383	1372	4988	6626	6384	10064	14506	7199	14804	1640	6698	6831	20876	75.0789	51.6092	31.0277	46.5602	12.8422	25.6312	8.27585	4.4935	20.7797	56.4793	85.7165	95.241	158.096	212.838	96.4181	229.149	27.1377	94.6825	102.309	273.746	2.57E-06	1.98653	up
ENSG00000113100	CDH9	85	61	26	31	6	11	3	21	17	42	34	111	48	80	139	184	39	153	96	277	0.739954	0.503685	0.18422	0.250307	0.042335	0.089234	0.02178	0.13758	0.143148	0.269431	0.243549	0.95204	0.480932	0.665699	1.10123	1.64223	0.366123	1.2301	0.812003	2.09734	9.86E-06	1.94574	up
ENSG00000182986	ZNF320	84	74	184	155	17	51	33	34	68	25	600	179	175	551	23	280	117	442	31	112	0.879342	0.628691	1.06641	0.970463	0.340753	0.418761	0.823763	0.337762	1.04785	0.30335	2.27693	1.0699	0.876972	2.1956	0.546029	3.88705	0.649262	1.70884	0.594954	0.54823	0.000774614	1.82413	up
NewGene_2594	NewGene_2594	26	105	80	0	0	60	0	93	0	82	126	123	126	145	144	322	43	120	155	186	0.146932	0.612859	0.409283	0	0	0.353103	0	0.435879	0	0.370839	0.651015	0.733534	0.786008	0.846007	0.770962	1.99368	0.281541	0.677022	0.925139	0.974109	0.0336373	1.80368	up
NewGene_4875	NewGene_4875	180	150	57	46	100	41	152	108	113	145	390	403	283	252	495	350	195	571	138	234	2.1108	1.65376	0.547931	0.484548	1.01701	0.453254	1.59744	0.965282	1.30874	1.22758	4.03735	4.82935	3.57814	2.94068	5.05724	4.20891	2.58753	6.39686	1.56658	2.51132	4.85E-10	1.68998	up
ENSG00000081051	AFP	81	129	38	31	31	38	10	15	36	39	60	81	11	219	29	164	35	386	93	324	0.822092	1.32387	0.341827	0.3065	0.296132	0.386782	0.088337	0.117599	0.37447	0.308824	0.539167	0.849952	0.111974	2.26726	0.266249	1.78071	0.402683	3.85071	0.977928	2.99483	0.0013355	1.59117	up
ENSG00000136457	CHAD	176	84	42	29	41	47	12	35	37	170	48	132	62	180	44	260	16	202	217	895	2.48637	1.27832	0.523415	0.404566	0.534318	0.664931	0.140431	0.391014	0.582183	1.86858	0.597361	2.13263	0.985514	2.69209	0.566142	4.25569	0.250507	2.80401	3.20886	12.1176	0.00166566	1.57944	up
ENSG00000147606	SLC26A7	27	24	26	28	12	15	44	37	38	35	37	159	59	109	16	87	35	50	131	120	0.129164	0.116511	0.109369	0.130768	0.054306	0.072981	0.190434	0.143589	0.189756	0.149574	0.155123	0.794127	0.32399	0.532438	0.067159	0.444931	0.188493	0.232063	0.650633	0.530184	1.26E-06	1.54022	up
ENSG00000099984	GSTT2	10	34	33	40	25	9	65	79	82	92	160	124	216	136	114	78	19	131	116	130	0.195764	0.725178	0.609692	0.835613	0.491383	0.190626	1.42875	1.367	1.83549	1.53231	3.16275	3.21781	5.01941	2.94716	2.25125	1.9155	0.464205	2.72211	2.56035	2.51971	2.28E-05	1.50878	up
ENSG00000145244	CORIN	92	55	22	12	19	25	14	14	36	97	47	59	46	83	57	203	7	151	125	304	0.498145	0.289216	0.10173	0.059105	0.092094	0.129121	0.063214	0.059412	0.20852	0.395464	0.236788	0.411285	0.260367	0.434512	0.272034	1.2571	0.039082	0.771949	0.685949	1.5303	0.000973768	1.49466	up
ENSG00000166960	CCDC178	45	56	68	75	36	34	58	44	44	98	103	85	60	247	112	114	133	186	174	242	1.30154	1.63878	1.41893	2.13449	0.803435	0.255967	1.3601	1.02283	1.32009	1.71292	2.09276	2.44523	1.87407	7.05561	2.83747	3.15496	4.18985	5.06964	5.08231	6.11232	2.22E-10	1.45476	up
ENSG00000060718	COL11A1	301	150	28	60	32	91	11	31	131	395	52	242	77	340	39	620	12	313	502	1071	1.05703	0.521414	0.083983	0.200213	0.103486	0.318736	0.03138	0.085907	0.472383	1.07793	0.160122	0.874771	0.286201	1.18879	0.122396	2.33602	0.045132	1.0577	1.79663	3.41004	0.0279069	1.41806	up
ENSG00000106436	MYL10	2826	2167	500	560	1819	1460	1722	1596	639	1215	3765	3240	1129	4775	2059	3205	2248	7032	4479	6258	101.467	77.6231	16.3074	19.9494	61.3123	54.5166	56.5673	47.7424	24.5074	33.4058	118.5	118.063	44.3719	173.617	66.8574	122.594	94.0567	249.585	167.265	204.885	2.83E-05	1.39816	up
ENSG00000013573	DDX11	96	55	48	51	26	37	44	63	59	41	181	70	31	226	40	360	20	90	41	327	0.601462	0.354342	0.274562	0.506086	0.148639	0.243998	0.23872	0.320902	0.412521	0.194584	1.12571	0.455704	0.196543	1.59162	0.226408	2.68476	0.147244	0.584003	0.292465	2.00373	0.00068	1.38277	up
NewGene_3555	NewGene_3555	26	35	80	12	19	30	17	10	83	39	143	86	42	70	293	16	38	41	87	11	0.114578	0.29142	0.422478	0.220733	0.072511	0.167786	0.063963	0.063431	0.594764	0.198003	0.799177	0.443478	0.19157	0.581553	1.98526	0.35667	0.346014	0.403606	0.490374	0.211022	0.00624516	1.34546	up
ENSG00000125869	LAMP5	137	137	20	39	38	63	36	24	77	90	65	116	98	184	104	279	8	121	257	470	1.70436	1.71387	0.231791	0.470812	0.440242	0.794659	0.394292	0.228017	1.00242	0.877939	0.734965	1.4754	1.31972	2.35203	1.1964	3.70227	0.124207	1.46681	3.31437	5.29547	0.00223716	1.31698	up
ENSG00000162989	KCNJ3	133	89	55	44	51	40	65	60	58	34	112	197	86	135	104	309	30	175	209	153	0.670713	0.449464	0.242928	0.22221	0.238204	0.20403	0.293709	0.244838	0.302442	0.148714	0.50502	1.04854	0.486152	0.717607	0.486255	1.71287	0.186777	0.860253	1.11667	0.732729	1.28E-05	1.262	up
ENSG00000154864	PIEZO2	341	248	76	94	150	148	84	126	320	669	105	459	133	647	126	956	44	514	815	1241	0.940486	0.695943	0.187486	0.247345	0.410483	0.399429	0.195783	0.2669	0.897671	1.39722	0.244392	1.32322	0.374029	1.79123	0.301061	2.83586	0.134152	1.34164	2.41523	3.00627	0.0140725	1.19149	up
ENSG00000164796	CSMD3	265	331	193	163	77	61	13	21	59	50	362	67	30	295	482	279	458	284	139	274	0.507648	0.640649	0.327038	0.30886	0.13775	0.119549	0.022248	0.032614	0.118341	0.074979	0.621203	0.132173	0.060655	0.572998	0.855952	0.572649	1.00579	0.532094	0.274947	0.476247	0.0328441	1.183	up
ENSG00000151079	KCNA6	25	55	27	69	91	63	7	8	96	29	164	76	57	87	197	91	92	66	102	112	0.149685	0.330321	0.142471	0.406015	0.508735	0.383446	0.03293	0.038734	0.596659	0.133981	0.873366	0.46618	0.368293	0.525767	1.08746	0.582252	0.628794	0.384098	0.626043	0.602524	0.00316842	1.17507	up
NewGene_10727	NewGene_10727	29	10	63	15	41	22	75	76	45	66	86	122	122	70	123	110	35	110	93	37	0.187586	0.07951	0.293782	0.075028	0.421547	0.117758	0.458918	0.395075	0.51346	0.38295	0.630304	0.888208	0.743503	1.10637	0.705488	0.618334	0.255171	0.630216	0.632316	0.396057	0.000247767	1.15809	up
NewGene_11523	NewGene_11523	82	54	38	87	30	34	26	11	66	191	109	110	91	169	63	84	58	204	164	238	2.14483	1.63778	0.981599	2.47335	0.827393	0.918849	0.534183	0.187496	2.16495	4.36179	2.72416	2.89992	3.04642	5.29699	1.33743	2.58786	1.52657	5.6174	5.05635	6.3697	0.00078232	1.14827	up
NewGene_10789	NewGene_10789	50	65	15	28	22	11	20	32	38	121	49	64	36	106	28	83	27	146	63	217	1.77334	2.36395	0.387981	1.00341	0.636985	0.381029	0.591563	0.863697	1.41042	3.33915	1.84017	2.29102	1.13874	3.50062	0.955888	2.99129	1.0654	5.33628	1.9871	6.95722	0.00398792	1.09166	up
ENSG00000165887	ANKRD2	84	61	108	125	83	50	4	54	37	37	119	30	96	84	206	105	83	85	69	506	1.46041	1.05871	1.66461	2.13764	1.36059	0.879814	0.059736	0.752513	0.649641	0.493115	1.83855	0.518034	1.81176	1.47241	3.31523	1.94264	1.63594	1.4333	1.23823	8.00042	0.0131713	1.07199	up
NewGene_9932	NewGene_9932	172	114	0	44	45	28	63	35	74	130	62	85	42	167	66	313	52	112	245	328	0.706003	0.471629	0	0.200953	0.170901	0.116046	0.229798	0.114204	0.316342	0.443442	0.227197	0.361647	0.18669	0.694335	0.248837	1.37562	0.240283	0.482512	1.04773	1.22121	0.0280588	1.06556	up
ENSG00000204248	COL11A2	499	265	312	342	161	178	199	350	371	505	206	814	216	762	221	810	136	523	1058	1873	2.05059	1.0539	1.148	1.35077	0.595863	0.718677	0.702263	1.15449	1.55613	1.69288	0.751329	3.33613	0.923249	3.22507	0.819738	3.44468	0.625756	2.10603	4.51243	6.79181	0.0011843	1.05668	up
ENSG00000164161	HHIP	682	580	220	182	329	308	245	364	312	552	266	698	281	1180	435	1398	164	560	692	2252	1.83517	1.73513	0.554047	0.45123	0.829768	0.822185	0.592265	0.85109	0.836554	1.18952	0.685848	1.92778	0.790624	3.09901	1.05187	3.95377	0.469902	1.65861	1.86042	5.24316	0.00151508	1.04574	up
ENSG00000066827	ZFAT	208	144	202	159	163	124	172	182	189	196	143	159	192	152	167	241	82	175	170	2342	1.36186	0.769774	1.03568	0.829504	0.829343	0.671594	0.883592	0.783886	1.05052	0.811306	0.709702	0.866595	1.1054	0.814794	0.962775	1.36689	0.492792	0.903407	0.930799	11.6545	0.0131388	1.04271	up
ENSG00000169989	TIGD4	212	119	86	59	81	73	58	35	176	162	82	227	110	322	137	354	45	204	202	441	2.17519	1.23185	0.779652	0.593489	0.775386	0.757162	0.529332	0.29159	1.88087	1.30071	0.744804	2.40099	1.21875	3.34384	1.29801	3.88454	0.51794	2.03725	2.13842	4.09496	0.00187827	1.01088	up
ENSG00000118849	RARRES1	432	385	116	152	341	386	155	185	259	1208	260	879	190	1406	199	1099	258	523	1353	694	5.66887	5.07276	1.34311	1.95511	4.16266	5.1882	1.81082	1.9766	3.53341	12.2951	3.0214	11.7797	2.6749	18.7083	2.39914	15.3656	3.84481	6.63924	18.2741	8.39466	0.017256	1.00364	up
NewGene_3518	NewGene_3518	25	33	18	13	39	49	65	44	51	69	110	49	16	106	52	117	34	97	83	130	0.422793	0.570294	0.277269	0.219254	0.636579	0.848083	1.02019	0.610232	0.911435	1.001	1.79202	0.92061	0.286887	1.88121	0.817648	2.21057	0.711482	1.63546	1.52582	2.15624	0.00119866	0.999729	up
NewGene_4885	NewGene_4885	32	42	96	95	62	59	120	101	56	79	219	84	124	99	275	165	139	62	108	105	0.226314	0.243673	0.583444	0.842961	0.396222	0.628717	0.858459	0.556463	0.631973	0.444612	1.51972	0.690443	1.1881	0.600596	1.89051	1.31797	1.50581	0.468331	0.93214	0.667672	0.000349093	0.996672	up
ENSG00000172179	PRL	98	165	138	113	108	131	17	30	69	92	75	312	138	185	116	166	143	133	371	260	1.8149	3.09139	2.26017	2.05952	1.87723	2.48148	0.277706	0.440713	1.34249	1.33495	1.24319	5.97285	2.77933	3.48527	1.98217	3.28645	3.04142	2.40752	7.12509	4.38148	0.00310891	0.994147	up
ENSG00000146250	PRSS35	48	38	54	29	28	40	46	72	26	78	60	69	58	91	68	141	18	42	111	232	0.48953	0.395035	0.497621	0.291846	0.272058	0.425099	0.428271	0.603948	0.281691	0.628352	0.554869	0.73737	0.653409	0.95726	0.649302	1.55951	0.202613	0.417737	1.19125	2.18321	0.000622518	0.975584	up
ENSG00000155886	SLC24A2	115	66	63	75	106	100	40	81	120	79	116	278	59	65	206	233	58	154	99	401	0.270109	0.157196	0.130116	0.173277	0.233909	0.239978	0.083084	0.154863	0.295855	0.145811	0.24337	0.675592	0.150287	0.15425	0.448011	0.586347	0.155673	0.354446	0.240754	0.855053	0.00110174	0.972652	up
ENSG00000164694	FNDC1	649	292	268	238	356	362	128	173	551	1030	278	542	306	767	294	1870	49	577	917	2359	2.51076	1.142	0.917624	0.908356	1.29351	1.43386	0.445515	0.542498	2.23238	3.11784	0.959167	2.16071	1.28591	3.00899	1.05215	7.74285	0.213132	2.17925	3.67165	8.31795	0.0333858	0.972112	up
ENSG00000260428	SCX	181	191	85	68	80	79	44	57	84	338	188	246	100	273	125	248	39	289	310	473	4.59157	4.88789	1.90596	1.68011	1.90101	2.04486	0.988947	1.15588	2.22334	6.71109	4.26471	6.41767	2.73312	7.0054	2.92482	6.71804	1.12261	7.15052	8.12988	10.8664	0.00346796	0.970983	up
ENSG00000176890	TYMS	53	81	43	46	29	25	17	20	41	36	48	110	30	72	97	84	52	60	83	113	0.806758	1.24132	0.578145	0.679238	0.408744	0.381032	0.229999	0.245207	0.650814	0.419286	0.649498	1.72692	0.496185	1.10143	1.36458	1.3573	0.903698	0.882856	1.30372	1.55738	0.000383394	0.966696	up
ENSG00000108342	CSF3	60	26	36	12	27	28	10	32	31	47	53	82	45	73	59	49	47	50	79	22	0.897	0.421155	0.52343	0.175506	0.417992	0.431975	0.123796	0.402544	0.481098	0.549412	0.705961	1.27938	0.770683	1.10954	0.819854	0.830719	0.823382	0.735467	1.51113	0.30109	0.000518831	0.963699	up
ENSG00000150551	LYPD1	192	198	85	65	41	76	27	29	130	262	54	167	45	282	96	418	13	220	233	642	2.56494	2.69826	1.00877	0.861412	0.507818	1.02969	0.315547	0.314679	1.8114	2.7692	0.645043	2.33634	0.671184	3.8814	1.19989	6.01569	0.187047	2.87044	3.22248	7.96594	0.0413718	0.961	up
ENSG00000169436	COL22A1	884	339	259	280	145	113	191	346	692	722	290	809	392	437	346	2036	63	543	608	2108	3.92483	1.5353	0.911843	1.15031	0.580389	0.455805	0.684275	1.16337	2.94433	2.38718	1.0294	3.77139	1.75527	1.83013	1.27806	9.035	0.280176	2.11365	2.59016	7.79801	0.0362657	0.954426	up
NewGene_10103	NewGene_10103	266	146	449	359	359	270	678	747	699	444	779	1061	961	423	1766	889	676	361	561	296	0.629868	0.378958	1.35888	0.910283	1.46981	0.803362	1.92244	1.86489	2.10524	1.73981	2.42974	3.08016	2.99161	1.23644	4.37069	3.02383	2.17013	1.1994	2.28878	0.832877	0.00176766	0.952284	up
ENSG00000168621	GDNF	36	25	55	16	15	19	70	95	23	41	117	98	26	81	30	112	30	75	82	76	0.254239	0.168165	0.326176	0.103748	0.089911	0.124564	0.414963	0.544766	0.155545	0.212423	0.691809	0.667542	0.186243	0.570114	0.180735	0.825801	0.222797	0.487308	0.559354	0.453145	0.00400427	0.9516	up
NewGene_1869	NewGene_1869	56	49	84	31	19	20	34	45	59	114	161	167	49	74	76	83	80	80	52	60	0.267218	0.236693	0.355596	0.143588	0.083116	0.096789	0.1787	0.177254	0.326224	0.462587	0.695897	0.837574	0.253589	0.364756	0.343205	0.532713	0.434474	0.41938	0.256259	0.259982	0.00135846	0.935906	up
NewGene_4622	NewGene_4622	118	155	196	164	153	103	131	105	35	70	182	29	321	297	210	244	369	193	202	138	2.87038	3.79917	4.22227	3.90575	3.48188	2.54819	2.8729	2.0604	0.856314	1.32335	3.92185	0.725603	8.28822	7.10908	4.73367	6.2873	10.2077	4.55484	5.02209	3.01989	0.00778942	0.933907	up
ENSG00000123496	IL13RA2	50	49	58	36	48	43	128	198	84	98	269	308	28	71	71	66	179	61	271	27	0.88929	0.864066	0.863793	0.582282	0.75618	0.768571	1.94602	2.88556	1.56455	1.40447	4.22249	5.54289	0.540209	1.29449	1.1894	1.18303	3.55064	1.07623	5.04821	0.41253	0.0301953	0.929321	up
ENSG00000133433	GSTT2B	167	107	158	186	125	141	673	825	476	667	807	541	857	520	570	598	139	794	527	763	3.89834	2.56243	3.26566	4.27887	2.76935	3.438	14.3247	16.1186	11.9491	12.494	16.979	13.3877	22.2514	12.5907	12.5677	15.0846	3.73144	18.4683	13.1484	16.6359	0.00591064	0.920439	up
ENSG00000133020	MYH8	120	110	158	244	76	63	80	83	285	554	541	100	278	273	119	898	109	169	198	387	0.502611	0.464575	0.584522	1.01113	0.296653	0.27051	0.300416	0.280633	1.25179	1.82031	2.03045	0.428798	1.26405	1.1602	0.461742	4.02965	0.519738	0.690456	0.859026	1.47098	0.0185387	0.902172	up
ENSG00000188517	COL25A1	1808	1590	1355	1183	1007	1050	986	1151	1132	986	1630	2800	1260	2171	2529	3859	1151	2009	2702	2323	6.51047	5.10579	3.81782	3.73757	2.98958	3.4047	2.80243	3.4427	3.74753	2.50239	4.60318	9.13783	4.41608	6.96706	7.42065	13.3862	4.17309	6.74065	9.15205	8.45476	1.10E-07	0.898697	up
ENSG00000130203	APOE	176	168	127	138	215	172	254	143	136	292	209	806	229	393	116	380	49	222	381	576	3.69467	3.60331	2.44354	2.85669	4.43234	3.68705	4.96768	2.44078	2.99221	4.97402	3.91962	17.5676	5.25958	8.43984	2.34436	8.68486	1.22381	4.5641	8.35982	11.1263	0.00291349	0.89625	up
ENSG00000270011	ZNF559-ZNF177	89	63	112	124	57	109	50	73	89	111	143	143	136	155	144	164	141	145	171	202	1.2396	1.25588	1.2347	1.63495	0.677693	1.38501	0.58494	0.707109	1.47158	1.25574	1.54521	1.91844	1.74283	2.01872	1.67241	2.2963	1.78976	1.65894	2.38565	2.49188	9.78E-09	0.88428	up
ENSG00000157214	STEAP2	425	361	110	100	126	178	228	222	640	1185	361	602	268	813	296	807	311	746	472	1380	1.53052	1.34389	0.350061	0.354642	0.424334	0.653668	0.736989	0.69567	2.457	3.34171	1.16388	2.23451	1.04867	2.98046	0.987557	3.45889	1.2821	2.62552	1.78569	4.81067	0.0124024	0.870776	up
ENSG00000154920	EME1	207	116	13	36	19	24	64	66	41	29	129	183	51	109	101	189	27	182	68	67	2.24082	1.26988	0.112266	0.372986	0.18146	0.260831	0.614509	0.578911	0.448933	0.239882	1.23806	2.0412	0.589801	1.18729	1.00045	2.18433	0.322628	1.93106	0.755801	0.657772	0.0424292	0.867971	up
NewGene_6421	NewGene_6421	83	110	156	198	67	82	64	81	155	273	216	109	303	238	326	336	172	169	112	127	0.890326	1.34879	1.49749	1.90559	0.631637	0.935012	0.628733	0.780298	1.96091	2.29346	2.10369	0.918275	2.75834	2.41781	2.56385	3.4009	2.27105	1.97979	1.40414	0.989266	0.00169104	0.866039	up
NewGene_5234	NewGene_5234	85	66	23	14	39	24	12	14	52	84	34	52	43	137	44	125	44	70	35	140	1.1076	0.836387	0.251405	0.16139	0.669588	0.307779	0.155608	0.16191	0.893469	1.31617	0.481747	0.834325	0.731165	2.01847	0.583575	2.03673	0.67593	0.925366	0.506217	1.87377	0.0211166	0.862194	up
NewGene_3207	NewGene_3207	47	62	20	13	11	21	49	47	53	47	76	63	32	47	66	69	56	88	46	90	0.544402	0.727434	0.200883	0.141794	0.115854	0.245188	0.51241	0.443329	0.644307	0.426113	0.793175	0.750567	0.404546	0.545701	0.710393	0.854648	0.735222	0.992876	0.551928	0.943613	0.00174603	0.858271	up
NewGene_11128	NewGene_11128	78	96	57	47	17	41	62	35	141	175	150	93	29	136	39	184	34	422	63	137	0.435192	0.545014	0.282396	0.256899	0.08554	0.231917	0.312452	0.156435	0.829652	0.766413	0.753455	0.533889	0.176472	0.770781	0.199902	1.10145	0.212277	2.31788	0.366175	0.697492	0.0374686	0.855917	up
ENSG00000151715	TMEM45B	32	37	45	18	41	19	16	46	19	31	35	79	45	61	45	100	36	32	43	49	0.35314	0.420369	0.449209	0.198158	0.434831	0.218634	0.159892	0.416326	0.214329	0.267622	0.351371	1.04755	0.5516	0.767257	0.466034	1.21291	0.467018	0.350125	0.536915	0.502135	0.000649888	0.855425	up
NewGene_2985	NewGene_2985	948	913	575	522	738	651	418	365	647	966	1136	1397	812	1287	974	1223	428	1779	1594	1160	10.9789	11.1208	5.40586	5.90758	8.07405	7.52649	4.91453	3.34555	8.18315	8.98677	11.801	18.4645	10.3013	14.9604	9.10298	14.1518	5.37119	19.8412	18.9444	11.7081	1.21E-05	0.840291	up
ENSG00000143194	MAEL	24	33	43	40	41	39	28	15	24	30	55	47	41	82	69	68	38	68	13	74	0.318953	0.495414	0.563589	0.519673	0.571933	0.545545	0.328595	0.16095	0.331011	0.348593	0.642148	0.632361	0.580029	1.09547	0.840354	0.962092	0.567297	0.934846	0.170653	0.931851	0.00190083	0.838854	up
ENSG00000124479	NDP	278	266	215	144	207	200	318	248	252	318	624	558	232	374	373	484	208	608	409	314	3.98979	3.91452	2.72645	1.96276	2.83296	2.93314	3.95821	2.78566	3.8573	3.43344	8.11139	8.42522	3.63924	5.49501	5.06153	7.18349	3.29072	8.38447	6.21904	4.14496	1.20E-06	0.837412	up
NewGene_2591	NewGene_2591	147	96	56	33	73	51	39	42	41	77	117	121	92	121	126	88	44	101	156	180	0.848626	0.557035	0.282042	0.183741	0.393242	0.298734	0.199815	0.195548	0.24428	0.345119	0.601582	0.716059	0.571235	0.707989	0.668225	0.537885	0.287267	0.567308	0.926569	0.940152	0.000875385	0.83444	up
ENSG00000255823	MTRNR2L8	79	93	54	51	78	54	62	60	47	77	75	63	474	56	79	41	74	60	77	52	1.53332	1.81224	0.92172	0.961837	1.41266	1.05776	1.0732	0.945204	0.941287	1.16122	1.29513	1.25743	9.99706	1.08625	1.40912	0.847198	1.62999	1.13908	1.5344	0.906428	0.0373398	0.833845	up
NewGene_7424	NewGene_7424	74	32	26	11	10	26	17	10	55	115	68	108	41	46	54	59	11	46	77	118	1.63519	0.868479	0.561483	0.150177	0.190887	0.425105	0.441413	0.161682	1.35395	1.87586	1.18359	2.41236	0.929456	0.706238	1.15078	1.29578	0.142753	1.08057	1.56066	2.35177	0.0359447	0.831561	up
ENSG00000156475	PPP2R2B	31	46	29	40	70	54	31	83	58	74	36	124	47	89	35	167	50	73	98	180	0.072928	0.108123	0.058916	0.091837	0.373035	0.147367	0.065079	0.379804	0.142348	0.212446	0.074209	0.322506	0.122062	0.213147	0.075533	0.586007	0.134798	0.196172	0.383354	0.409008	0.00298189	0.830194	up
NewGene_5572	NewGene_5572	92	108	93	97	63	64	54	31	142	352	132	158	69	310	55	159	115	316	224	250	1.11783	1.21135	0.914171	1.06074	0.655881	0.723964	0.53995	0.280728	1.76765	3.08346	1.3106	1.81467	0.835819	3.52661	0.566366	1.89472	1.46282	3.44343	2.57879	2.69585	0.0127671	0.819002	up
ENSG00000133794	ARNTL	150	123	89	93	67	74	65	75	62	145	95	67	52	409	256	375	53	49	100	174	1.60665	1.41651	0.858499	0.844838	0.700497	0.925902	0.615632	0.738835	0.616365	1.11846	0.838447	0.701811	0.562229	3.88235	2.42853	4.01302	0.703336	0.564496	1.08361	1.82553	0.0211802	0.817794	up
NewGene_7168	NewGene_7168	105	129	18	20	53	36	82	105	37	135	24	122	100	107	155	74	146	137	29	275	0.667565	0.830597	0.097623	0.12206	0.312532	0.234254	0.469102	0.543325	0.244194	0.671956	0.135844	0.79864	0.688207	0.68962	0.911179	0.502597	1.05916	0.850325	0.18517	1.58675	0.0413117	0.810018	up
ENSG00000188522	FAM83G	35	22	39	47	31	23	46	65	42	59	109	69	31	44	118	91	45	56	46	63	0.163974	0.106997	0.164359	0.222628	0.139725	0.108765	0.19766	0.253377	0.207957	0.22171	0.469206	0.342184	0.159721	0.212912	0.522588	0.464912	0.244265	0.260528	0.226924	0.274494	0.0006631	0.808968	up
NewGene_11800	NewGene_11800	145	136	170	95	39	40	63	55	118	190	160	220	142	219	131	120	200	155	174	149	1.95296	2.0156	2.13985	1.25154	0.490397	0.517028	0.713437	0.57104	1.75368	2.04896	2.05233	3.2314	2.18792	3.05334	1.73989	1.76472	3.41607	2.11314	2.44101	1.84245	0.00170003	0.803099	up
NewGene_11966	NewGene_11966	49	51	81	66	108	124	55	105	119	122	120	61	230	151	261	151	114	129	68	147	0.45821	0.36757	0.497605	0.392229	0.73494	0.81841	0.379977	0.61914	0.822688	0.848616	0.855324	0.594866	1.53729	1.25802	1.4951	1.32022	1.13491	1.01825	0.561373	1.02512	0.0024891	0.801302	up
ENSG00000066248	NGEF	67	74	10	25	25	7	22	23	42	69	45	67	14	87	35	101	21	71	76	98	0.539391	0.615436	0.067297	0.200118	0.17859	0.054838	0.154983	0.147231	0.350552	0.447375	0.311215	0.544545	0.11461	0.721006	0.254352	0.962353	0.186693	0.541673	0.615883	0.728039	0.0359011	0.792365	up
ENSG00000007908	SELE	72	55	29	44	93	54	56	63	90	78	177	82	41	75	107	121	22	115	128	226	0.486384	0.364534	0.165176	0.280826	0.570509	0.358685	0.326639	0.329439	0.614277	0.398165	1.03753	0.555933	0.292774	0.494474	0.649804	0.849521	0.16244	0.764142	0.866367	1.34573	0.00393093	0.789789	up
ENSG00000183873	SCN5A	57	53	56	55	44	48	34	56	77	48	89	73	31	58	57	125	27	136	131	186	0.169087	0.158502	0.146217	0.160408	0.121987	0.143964	0.089908	0.135608	0.239474	0.109954	0.236505	0.224014	0.098187	0.17402	0.156333	0.394083	0.088227	0.394762	0.403882	0.501309	0.00174716	0.788437	up
ENSG00000151575	TEX9	80	46	38	36	37	41	9	33	39	59	44	86	31	81	77	224	24	34	47	60	0.906142	0.777955	0.379848	0.464033	0.513056	0.632588	0.098675	0.311438	0.556145	0.75028	0.381464	1.17372	0.370323	1.10368	1.01501	2.97698	0.480492	0.436658	0.675069	0.580667	0.0236405	0.788137	up
ENSG00000185304	RGPD2	15	8	30	15	39	34	40	44	99	97	96	41	64	43	72	39	47	132	22	106	0.052284	0.028421	0.096269	0.051019	0.133264	0.126878	0.131622	0.128584	0.377821	0.277725	0.312666	0.152254	0.250605	0.158817	0.242343	0.151146	0.193437	0.469151	0.082285	0.348492	0.0355254	0.78434	up
ENSG00000128683	GAD1	61	21	52	17	26	35	84	85	42	50	192	81	32	34	69	57	51	72	51	126	0.386354	0.135073	0.287376	0.178468	0.167231	0.221365	0.492389	0.463211	0.294246	0.262555	1.20869	0.520958	0.216278	0.217875	0.401662	0.488701	0.358397	0.450638	0.354399	0.718569	0.0169806	0.769087	up
ENSG00000041982	TNC	376	232	457	262	272	286	351	292	510	322	284	369	220	418	412	909	70	383	630	2238	1.26841	0.786805	1.36629	1.16396	0.945481	1.3469	1.39977	1.06293	1.79787	0.835997	1.09556	1.73098	1.09187	1.77042	1.51179	4.56023	0.268312	1.76298	2.86843	9.15484	0.0220238	0.763991	up
ENSG00000249992	TMEM158	105	80	53	92	56	106	94	154	121	202	214	218	84	134	93	137	77	182	150	458	1.45698	1.12627	0.649041	1.2681	0.730274	1.51345	1.1791	1.74674	1.7699	2.20475	2.67025	3.13918	1.27563	1.88977	1.19806	2.04547	1.21817	2.48522	2.16238	5.80286	0.00217846	0.761536	up
NewGene_3100	NewGene_3100	41	24	104	57	16	16	51	58	33	41	42	31	79	52	49	87	58	149	82	72	0.518951	0.3029	1.16838	0.707545	0.181407	0.198666	0.581128	0.595523	0.429536	0.403508	0.469971	0.403035	1.09122	0.671611	0.569743	1.1819	0.837564	1.84704	1.07858	0.823761	0.0154327	0.760621	up
NewGene_2292	NewGene_2292	51	24	33	22	12	11	13	25	45	67	52	40	45	36	57	65	45	35	46	43	0.787458	0.364989	0.446039	0.332211	0.173111	0.171531	0.180068	0.306771	0.728791	0.814534	0.714913	0.64027	0.756911	0.556754	0.820924	1.06624	0.791079	0.517383	0.731247	0.605275	0.00464394	0.753851	up
NewGene_1765	NewGene_1765	98	55	41	55	56	55	76	87	64	114	89	155	88	218	44	182	54	52	159	85	0.818625	0.485353	0.287981	0.470358	0.384772	0.668002	0.473799	0.545384	0.577603	0.701518	0.582095	1.27913	0.757367	1.84447	0.324776	1.98034	0.495384	0.389249	1.58896	0.643112	0.00361511	0.753722	up
ENSG00000170775	GPR37	467	333	309	307	396	343	430	579	809	491	802	763	549	349	1641	770	154	1022	553	527	3.92035	2.8229	2.29309	2.53637	3.11987	2.94084	3.23975	3.9479	7.10966	3.21995	6.01865	6.60528	5.003	2.96657	12.7522	6.91055	1.4773	8.38353	4.79919	4.00589	0.0047861	0.744707	up
ENSG00000183479	TREX2	26	112	33	53	16	34	156	51	25	81	62	90	41	106	87	100	122	45	90	196	0.307868	1.27205	0.356114	0.607676	0.176756	0.382199	1.56406	0.487944	0.308426	0.767742	0.616969	1.06698	0.56399	1.25482	0.956231	1.20052	1.6603	0.488772	1.07731	2.04456	0.0418645	0.741494	up
ENSG00000172404	DNAJB7	28	31	43	12	13	38	17	29	42	51	66	66	18	23	88	32	41	52	30	56	0.273795	0.307597	0.366818	0.116226	0.119067	0.376706	0.145501	0.22561	0.43188	0.38761	0.575983	0.668005	0.183818	0.227352	0.793657	0.332132	0.450709	0.493802	0.301562	0.498104	0.0150846	0.735681	up
ENSG00000284874	AC000093.1	2071	1741	451	582	513	1073	1326	1121	1358	1794	1884	2818	1656	2034	1184	2675	957	1408	1338	3246	13.7403	11.4923	2.46095	3.54002	2.9694	7.77911	7.86482	5.61677	9.64095	8.65489	10.3873	19.6196	11.9174	14.1409	6.75447	17.6475	7.73582	8.48336	8.54016	19.8945	0.0031101	0.723936	up
ENSG00000183036	PCP4	60	48	40	51	34	48	32	47	53	62	101	76	83	91	71	63	44	61	47	113	2.25646	1.81666	1.33013	1.91837	1.21075	1.87423	1.09532	1.45098	2.09805	1.84922	3.45852	2.99813	3.42428	3.52467	2.49734	2.57478	1.93386	2.27936	1.86223	3.90931	1.98E-05	0.723459	up
ENSG00000116661	FBXO2	169	141	80	55	55	55	112	136	69	195	79	281	97	120	66	166	177	282	147	213	2.74418	2.30991	1.14385	0.875394	0.833629	0.911781	1.63593	1.79045	1.16372	2.47958	1.1371	4.69639	1.70965	1.9631	0.980857	2.87133	3.28052	4.47359	2.46381	3.13268	0.0100627	0.722238	up
NewGene_4741	NewGene_4741	64	89	51	37	59	44	57	77	73	88	113	111	60	62	62	168	70	75	81	220	0.290459	0.407005	0.203801	0.164416	0.264765	0.226092	0.228935	0.346872	0.340615	0.309293	0.454817	0.607491	0.308027	0.280589	0.255933	0.899496	0.413455	0.327789	0.428972	0.919101	0.000776107	0.721589	up
ENSG00000283900	TPTEP2-CSNK1E	43	63	68	45	50	38	62	56	41	92	44	62	121	69	57	246	34	124	42	75	0.607171	0.90956	0.853129	0.631795	0.663319	0.551484	0.791956	0.648532	0.601167	1.02763	0.560268	0.90324	1.86851	0.995549	0.753339	3.76848	0.550726	1.73142	0.608519	0.970152	0.013274	0.713502	up
ENSG00000283782	AC116366.3	310	205	579	424	489	348	416	344	188	454	894	1054	152	988	532	534	454	596	333	275	0.993452	0.662014	1.64217	1.34004	1.47519	1.14325	1.19898	0.896427	0.62702	1.13769	2.56346	3.48678	0.526876	3.21111	1.5802	1.82903	1.66938	1.86871	1.10063	0.797262	0.0134743	0.700115	up
NewGene_532	NewGene_532	50	56	12	16	37	36	29	51	25	38	78	30	53	60	86	48	38	34	80	32	0.861712	0.973718	0.176949	0.270481	0.592125	0.638077	0.449047	0.718862	0.452539	0.505678	1.21038	0.526357	0.989549	1.05275	1.46921	0.881585	0.738345	0.564427	1.42711	0.496059	0.0154145	0.698215	up
NewGene_6932	NewGene_6932	487	383	350	256	270	249	652	541	430	370	497	387	608	494	613	842	737	792	447	572	2.61676	2.42645	1.61011	1.38915	1.26705	1.33809	3.11952	2.17489	2.4348	1.96624	2.30687	2.60865	3.92182	2.98813	3.16841	3.8727	4.62763	4.19028	2.98376	3.15638	0.000338392	0.694275	up
NewGene_2912	NewGene_2912	31	42	40	65	30	40	5	45	46	61	104	85	65	41	68	23	31	75	53	77	0.5395	0.728467	0.616719	1.11767	0.483324	0.712478	0.078556	0.641215	0.834153	0.848318	1.62538	1.52355	1.23566	0.718655	1.09198	0.423607	0.612446	1.26896	0.960708	1.21543	0.0217779	0.693983	up
NewGene_10254	NewGene_10254	217	209	447	299	175	227	235	368	483	211	291	1439	263	247	326	478	389	211	284	440	0.634955	0.619254	1.16137	0.863081	0.482178	0.679024	0.61893	0.874909	1.48098	0.482409	0.762177	4.35062	0.83588	0.733708	0.882988	1.49881	1.30469	0.603484	0.859593	1.16926	0.0210382	0.691625	up
ENSG00000123901	GPR83	75	47	31	39	85	45	61	54	42	70	71	101	28	167	75	119	11	86	118	107	0.442326	0.277067	0.160092	0.223451	0.471464	0.268699	0.323517	0.255454	0.260388	0.320411	0.371118	0.614604	0.177333	1.00148	0.407863	0.750628	0.070493	0.493169	0.721199	0.571653	0.0191023	0.691236	up
ENSG00000171246	NPTX1	41	53	52	30	32	32	35	52	28	30	14	55	63	71	31	82	15	67	53	175	0.2005	0.260957	0.224643	0.146394	0.147013	0.160317	0.153667	0.208275	0.142727	0.114814	0.059743	0.277193	0.335893	0.354508	0.139819	0.429559	0.080125	0.31971	0.267438	0.782512	0.0277626	0.689369	up
NewGene_10068	NewGene_10068	34	42	40	21	23	44	32	23	40	23	33	69	33	42	58	51	20	101	48	55	0.426446	0.613744	0.610863	0.246968	0.262542	0.620919	0.346401	0.205074	0.478549	0.221359	0.457013	0.947812	0.420516	0.679414	0.816485	0.746196	0.282154	1.36289	0.636374	0.857687	0.0057785	0.688749	up
ENSG00000135902	CHRND	1312	989	800	699	875	796	919	1367	771	825	1584	1495	698	1387	1167	2379	523	2190	1838	1556	11.6279	9.29622	6.34907	6.23655	7.28181	7.33553	7.80553	10.4677	7.58094	5.7678	12.4183	14.4271	7.04085	12.5828	9.38778	22.6931	5.38728	19.6317	17.2045	12.7863	0.000186146	0.688331	up
NewGene_9099	NewGene_9099	37	42	32	31	15	17	9	29	63	69	29	61	49	47	66	78	55	37	31	52	0.33822	0.3369	0.225408	0.240251	0.118512	0.133252	0.06544	0.190181	0.529617	0.432046	0.234677	0.503338	0.427876	0.424616	0.493659	0.921321	0.551099	0.290528	0.25878	0.374789	0.0168815	0.688205	up
ENSG00000178075	GRAMD1C	80	69	49	17	39	47	52	28	34	34	57	57	43	49	45	85	50	65	91	181	0.484957	0.463308	0.262041	0.100787	0.217073	0.286678	0.291659	0.136119	0.211589	0.159702	0.306862	0.357931	0.281125	0.295706	0.247601	0.5487	0.346083	0.408525	0.569217	1.00496	0.013383	0.684462	up
ENSG00000203727	SAMD5	31	51	45	36	44	42	72	57	44	110	36	92	45	79	106	179	27	85	62	110	0.127258	0.211599	0.162792	0.144281	0.169874	0.177592	0.26924	0.190295	0.189568	0.356025	0.131646	0.393239	0.199301	0.332932	0.406777	0.794343	0.127047	0.342418	0.263807	0.412602	0.00780947	0.683819	up
ENSG00000142920	AZIN2	184	173	105	88	83	102	92	100	123	256	94	178	139	269	105	274	88	177	244	476	2.18564	2.21211	1.38134	1.01035	0.948121	1.32644	0.959075	0.940843	1.59036	2.50704	0.997616	2.17108	1.84435	3.21021	1.20044	3.41947	1.26321	2.00338	2.98079	5.31871	0.00500153	0.680696	up
ENSG00000138829	FBN2	90	45	46	43	35	47	50	41	79	116	48	64	58	118	69	249	16	74	64	167	0.222052	0.105563	0.092546	0.099698	0.077109	0.113242	0.102273	0.077567	0.196552	0.215876	0.101054	0.160247	0.148548	0.282675	0.150449	0.63918	0.041143	0.172974	0.197674	0.357924	0.0294429	0.676527	up
ENSG00000143768	LEFTY2	128	53	73	77	58	47	42	30	72	95	43	110	69	66	85	188	24	68	115	323	1.41667	0.593558	0.708975	0.832188	0.596898	0.525672	0.412108	0.266633	0.827152	0.822355	0.417863	1.37286	0.829821	0.739825	0.867551	2.22053	0.284973	0.727116	1.3192	3.24536	0.0362023	0.675889	up
ENSG00000147255	IGSF1	770	428	224	250	275	225	226	336	617	436	337	834	405	347	329	890	57	607	617	1669	4.59747	2.02687	0.984343	1.1561	1.48304	1.24216	1.01059	1.38031	3.78087	1.59604	1.40803	4.02897	2.14832	1.91001	1.66822	5.24922	0.313609	3.21866	3.87423	9.0562	0.042259	0.674111	up
ENSG00000187527	ATP13A5	37	48	67	57	28	24	41	51	66	50	82	120	61	39	59	61	74	59	39	107	0.22875	0.310711	0.370864	0.382331	0.160636	0.150504	0.229616	0.260268	0.429051	0.243761	0.516108	0.773797	0.414189	0.246977	0.337266	0.410625	0.528443	0.360854	0.250783	0.636795	0.00358723	0.672355	up
ENSG00000213221	DNLZ	326	348	292	271	291	297	279	281	303	505	391	322	548	392	394	307	591	709	634	392	11.0509	12.1622	8.85337	7.20103	9.34101	8.53028	8.51692	7.65775	10.708	13.6916	12.0973	11.4829	20.5692	13.7968	12.5978	11.3578	23.6551	24.1745	22.2255	12.0599	0.000184672	0.671325	up
ENSG00000112379	ARFGEF3	581	501	785	822	293	365	271	558	652	835	484	1064	499	611	995	1411	334	750	711	1967	0.990302	0.862447	1.18617	1.3819	0.468143	0.636107	0.414498	0.772071	1.16342	1.11303	0.73683	1.86881	0.922554	1.05554	1.56959	2.57191	0.651221	1.24823	1.25365	3.03821	0.00447168	0.669974	up
NewGene_11810	NewGene_11810	80	57	36	29	14	12	12	23	65	41	34	42	28	59	67	108	42	59	48	74	0.714992	0.512951	0.283616	0.248	0.117242	0.102674	0.091475	0.167153	0.605058	0.28677	0.265792	0.38431	0.269909	0.53279	0.551773	1.03407	0.429773	0.515929	0.436312	0.596479	0.0410125	0.66703	up
ENSG00000175832	ETV4	210	157	85	82	82	93	123	121	145	203	113	151	84	224	223	302	83	129	316	399	2.50403	1.91306	1.03613	0.953617	1.04997	1.01683	1.52531	1.15556	1.60367	1.77082	1.45808	2.13199	1.2592	2.89957	2.32686	4.08216	1.20242	1.43864	4.34927	4.1309	0.00562934	0.665859	up
NewGene_3559	NewGene_3559	96	83	249	259	71	46	200	199	177	256	360	211	195	184	583	221	111	134	217	189	1.13305	0.652015	1.98902	2.31692	0.460228	0.575414	1.9456	1.47213	1.5086	2.47636	3.02733	1.92259	2.20796	1.60787	4.4684	1.14295	1.43502	1.10085	1.72536	1.55157	0.0274567	0.664269	up
ENSG00000075213	SEMA3A	458	357	290	293	223	196	98	197	409	575	311	477	435	519	682	542	244	305	529	582	1.41036	1.15527	0.857184	1.02778	0.700302	0.61813	0.269943	0.491781	1.31771	1.38537	0.855341	1.51462	1.45626	1.62295	2.35746	1.83677	0.859652	0.9175	1.68602	1.6241	0.00247671	0.66154	up
ENSG00000118777	ABCG2	187	249	105	138	157	136	198	226	233	342	255	309	84	279	246	537	91	425	316	500	1.0556	1.43673	0.528922	0.772697	0.834226	0.782577	1.03141	1.07318	1.39216	1.51712	1.29916	1.82557	0.522244	1.61921	1.28831	3.38712	0.583998	2.47702	1.87382	2.60417	0.00565949	0.658857	up
ENSG00000125851	PCSK2	91	98	52	49	79	92	52	134	43	43	116	101	190	49	150	68	32	112	177	131	0.486035	0.527452	0.243111	0.258276	0.395559	0.502189	0.248756	0.578305	0.240008	0.179735	0.554336	0.556469	1.10217	0.2642	0.740969	0.387692	0.193575	0.584634	0.979966	0.63368	0.0256107	0.658703	up
NewGene_6246	NewGene_6246	71	82	88	112	43	30	26	117	289	149	168	249	109	164	118	233	98	159	69	89	0.884495	0.831675	1.0559	1.08928	0.433172	0.31609	0.256202	1.09359	3.23363	1.33263	1.84478	2.56367	1.32903	1.99729	1.156	2.64398	1.14851	1.64498	0.690989	0.911735	0.0478715	0.656053	up
ENSG00000181408	UTS2R	148	99	109	107	67	50	65	92	141	324	73	135	51	141	91	357	51	230	262	439	2.75573	1.86581	1.79395	1.96448	1.1686	0.953955	1.08843	1.38313	2.75558	4.728	1.20593	2.59491	1.02011	2.6547	1.5589	7.12939	1.08624	4.18763	5.05832	7.42916	0.0489813	0.655327	up
ENSG00000148408	CACNA1B	41	94	34	28	22	31	18	50	59	30	76	87	44	47	67	99	31	54	25	96	0.140273	0.298695	0.075842	0.06914	0.052056	0.080606	0.041487	0.103844	0.300457	0.060042	0.175803	0.230688	0.12182	0.288018	0.175739	0.273099	0.090146	0.172731	0.065928	0.224345	0.0256445	0.654444	up
ENSG00000236782	AL391650.1	79	92	93	108	65	97	140	111	81	128	168	153	164	154	130	191	83	137	132	182	1.39713	1.63108	1.6905	2.35582	1.21257	2.01962	2.53438	1.85624	1.62288	1.91381	2.93495	2.98491	3.75623	3.0668	2.56	4.44656	1.83488	3.15302	2.69864	3.58223	6.67E-07	0.649695	up
ENSG00000124019	FAM124B	65	82	103	98	78	77	50	34	48	79	41	80	68	105	241	132	37	110	106	198	0.633437	0.820194	0.925803	0.957788	0.727647	0.784731	0.431336	0.274331	0.49981	0.639303	0.375767	0.85798	0.749139	1.0817	2.25558	1.3977	0.413569	1.06377	1.13518	1.88617	0.0228095	0.649693	up
ENSG00000148488	ST8SIA6	67	48	68	33	65	69	69	88	60	34	84	97	102	61	142	129	26	71	87	122	1.00018	0.83456	0.982494	0.639312	1.1304	1.0086	1.01271	1.21096	1.02527	0.363868	1.0738	1.87678	1.74112	1.08453	2.24577	2.07129	0.546969	0.98452	1.17192	1.84303	0.00541657	0.645066	up
NewGene_10818	NewGene_10818	31	46	91	66	41	55	47	39	58	76	70	131	60	59	182	90	51	48	83	32	0.211916	0.313151	0.551334	0.444039	0.262564	0.383577	0.288511	0.212139	0.412369	0.405837	0.427602	0.922772	0.439732	0.403969	1.15136	0.657217	0.395906	0.314864	0.581249	0.195504	0.0226422	0.639448	up
ENSG00000277758	FO681492.1	116	91	163	127	142	148	54	140	111	81	103	236	109	120	248	190	98	182	260	241	0.631825	0.44934	0.750204	0.673924	0.670881	0.783324	0.23793	0.568979	0.5921	0.315784	0.452068	1.2153	0.591898	0.650412	1.14987	1.1968	0.550646	0.964864	1.35975	1.12555	0.0038557	0.630814	up
ENSG00000002587	HS3ST1	83	73	66	72	130	122	69	53	68	83	141	139	98	102	129	169	56	132	133	156	0.261458	0.232891	0.183394	0.221777	0.38311	0.39425	0.193568	0.134065	0.224771	0.222997	0.397593	0.451034	0.332986	0.386502	0.374411	0.570791	0.199131	0.406676	0.433707	0.445793	0.00100425	0.629154	up
NewGene_8471	NewGene_8471	107	137	287	419	290	291	258	254	166	344	436	233	369	294	239	333	500	312	272	754	0.56165	1.14272	2.10936	3.14262	2.42612	2.13114	3.60767	2.16843	1.47083	1.92627	2.69213	1.219	3.85128	3.28795	2.37934	2.60088	4.01203	2.97781	2.13763	4.86916	0.0116998	0.627382	up
NewGene_7882	NewGene_7882	778	917	282	232	321	289	764	804	706	424	771	1089	651	695	953	1206	457	842	921	559	2.47228	2.94433	0.792659	0.727882	0.958588	0.937807	2.18312	2.07477	2.34717	1.05327	2.191	3.56882	2.24316	2.23808	2.8037	4.10033	1.66193	2.61463	3.03004	1.6089	0.00902596	0.627265	up
NewGene_5179	NewGene_5179	1242	891	999	879	846	765	1300	1333	1003	1325	1707	2308	685	1539	1554	1947	925	1398	1596	2053	12.064	8.85614	8.02532	8.06827	7.70547	7.95668	11.0896	10.3611	10.1168	11.1943	13.4583	21.5655	6.71842	15.9196	13.4558	19.7394	9.97527	13.7498	14.8639	17.914	4.32E-06	0.626911	up
NewGene_5155	NewGene_5155	3998	4340	2091	2270	2095	2125	1809	1991	5292	7029	2196	4241	1752	5335	3033	6938	2718	8203	4308	10395	7.77854	8.80111	3.44019	4.38095	3.70974	4.26332	3.54847	3.42536	9.59548	12.1761	3.71136	8.09075	4.01567	11.7862	4.92075	12.0883	5.98205	16.3886	9.9254	21.9624	0.0192621	0.625114	up
ENSG00000166257	SCN3B	2084	1572	1292	973	1291	1090	1269	1694	1179	1450	2201	2315	1237	1321	2468	2923	1079	2365	1930	3013	9.29355	7.08676	4.94754	4.51153	5.34532	4.98364	4.95158	6.01438	5.30885	5.17295	8.70584	10.6237	5.87382	5.93182	10.1914	13.4604	5.56577	9.90675	8.79707	11.7546	3.20E-05	0.625062	up
ENSG00000070526	ST6GALNAC1	152	115	41	60	100	98	52	125	58	97	56	123	122	95	148	254	22	190	98	281	1.4864	1.1541	0.345302	0.656202	0.884421	0.955666	0.44447	0.95866	0.598319	0.719624	0.514315	1.20612	1.36919	1.01483	1.30901	2.72268	0.229541	1.87812	1.00158	2.51096	0.0445715	0.624942	up
ENSG00000174175	SELP	182	242	166	198	247	285	159	191	241	223	247	246	213	287	502	618	136	265	330	408	1.49275	2.01301	1.29532	1.57803	1.88151	2.34927	1.16736	1.25235	2.04143	1.41793	1.79314	2.0575	1.87897	2.35831	3.78279	5.36041	1.25046	2.10074	2.77625	3.17452	0.00158106	0.621696	up
ENSG00000169933	FRMPD4	64	98	30	39	58	32	41	29	66	33	54	112	60	75	124	99	20	55	83	62	0.190811	0.296499	0.078821	0.112657	0.162041	0.095839	0.110352	0.070527	0.205803	0.09309	0.143257	0.343131	0.192702	0.246467	0.342751	0.314393	0.065305	0.158453	0.255585	0.166952	0.0296736	0.621588	up
ENSG00000262655	SPON1	142	91	126	105	53	85	112	72	128	166	132	142	151	123	58	219	84	152	214	335	0.7421	0.481577	0.582516	0.543188	0.258538	0.453201	0.523531	0.305795	0.698668	0.681158	0.614344	0.766778	0.856664	0.651811	0.281421	1.22607	0.501475	0.777726	1.15833	1.5889	0.00453879	0.617737	up
ENSG00000179598	PLD6	591	573	267	262	412	352	346	457	617	557	690	679	511	717	945	1018	336	644	489	439	5.84898	5.73603	2.33939	2.55948	3.83411	3.56534	3.07728	3.67844	6.39887	4.31572	6.10964	6.9331	5.49558	7.19663	8.65989	10.7871	3.80855	6.23032	5.00781	3.93373	0.000971724	0.614669	up
ENSG00000049089	COL9A2	755	495	447	417	438	290	708	895	906	1049	1434	1174	586	597	1013	1022	508	1189	839	733	6.96145	4.47522	3.69374	3.74803	3.64691	2.76443	5.96785	6.69359	8.60622	7.54936	11.5915	10.9626	5.9686	5.45101	8.45572	10.1736	5.46335	10.789	7.90044	6.07464	0.00149323	0.613171	up
NewGene_8405	NewGene_8405	82	72	220	204	206	194	167	184	226	247	181	228	346	170	546	220	152	311	172	268	0.259102	0.230382	0.618815	0.638991	0.6901	0.664011	0.610597	0.473234	0.800115	0.771781	0.513068	0.772562	1.20205	0.594449	1.72394	0.776663	0.551432	0.963715	0.591809	0.769124	0.0124855	0.612792	up
NewGene_11343	NewGene_11343	591	461	341	335	271	312	361	358	525	935	572	603	301	1106	747	965	571	502	360	638	3.60324	2.7651	1.92959	2.057	1.48511	2.07486	1.91813	1.64401	3.42588	4.4713	3.19233	3.50423	1.94884	7.10343	4.26835	6.27313	3.86987	3.29579	2.37342	3.8247	0.00338485	0.612007	up
ENSG00000164099	PRSS12	298	134	140	120	148	133	198	155	217	509	242	290	166	407	179	405	118	328	508	304	1.57182	0.712286	0.651445	0.622889	0.730911	0.713801	0.937142	0.661866	1.19701	2.10043	1.13991	1.57421	0.949993	2.17347	0.872388	2.28206	0.711086	1.68998	2.76927	1.45073	0.0077912	0.609335	up
ENSG00000013588	GPRC5A	761	526	265	235	301	273	795	929	366	464	1299	506	311	801	779	1007	436	1047	546	353	2.69627	1.92842	0.806695	0.856916	0.985646	0.957662	2.52241	2.64971	1.40509	1.2494	4.03296	1.81902	1.16051	2.85303	2.57037	3.70739	1.71336	3.58391	1.94472	1.11378	0.0282508	0.608133	up
ENSG00000070159	PTPN3	577	296	188	95	123	110	292	336	332	345	260	507	116	421	328	768	106	524	339	636	2.04848	0.887046	0.499928	0.268851	0.335462	0.323966	0.763096	0.826309	1.2142	0.780138	0.670861	1.54681	0.365149	1.27649	0.884756	2.43601	0.359868	1.52224	1.02653	1.68139	0.0469111	0.607364	up
ENSG00000105784	RUNDC3B	286	180	139	121	239	216	185	235	160	246	273	340	159	194	326	372	105	541	274	378	1.86199	1.15204	0.81171	0.734446	1.50366	1.39116	1.0711	1.42594	1.09842	1.18726	1.63668	2.42809	1.11235	1.29564	1.87442	2.53519	0.856405	3.35249	1.7747	2.16882	0.00386515	0.592033	up
ENSG00000134917	ADAMTS8	1128	715	1374	1151	693	612	498	767	827	1310	1892	914	1239	668	1776	2088	497	806	977	2397	7.13788	4.56525	7.70478	7.18442	4.1161	3.95632	2.82918	3.94161	5.47283	6.48019	10.6982	5.96051	8.50622	4.2818	10.3947	14.1231	3.59565	4.9809	6.39485	13.7364	0.00922474	0.591835	up
NewGene_4128	NewGene_4128	94	112	184	140	102	73	50	81	66	64	51	92	129	135	235	245	50	195	89	225	0.422695	0.509669	0.732904	0.622647	0.429743	0.334753	0.20259	0.293797	0.310615	0.225018	0.201502	0.424521	0.628971	0.616985	0.978626	1.18091	0.256719	0.858041	0.411483	0.915072	0.0429069	0.590248	up
ENSG00000158859	ADAMTS4	21	68	44	40	44	42	33	23	43	36	57	32	44	72	108	116	18	47	34	58	0.054081	0.176917	0.110977	0.101593	0.118205	0.108877	0.074748	0.045823	0.116044	0.072888	0.131865	0.083851	0.122437	0.187393	0.258405	0.383448	0.055885	0.139165	0.095322	0.135044	0.0440396	0.587102	up
NewGene_8633	NewGene_8633	242	196	207	167	207	209	382	394	166	138	312	390	512	327	270	492	156	323	207	344	1.95852	1.35249	1.33731	1.14648	1.48405	1.83033	2.53768	2.54285	1.30601	0.959486	2.2943	3.23465	4.01895	2.50624	1.76371	3.9135	1.2172	2.48645	1.6715	2.32717	0.0071669	0.585067	up
ENSG00000036448	MYOM2	377	342	554	607	263	307	164	270	279	375	456	244	150	194	190	296	168	164	255	138	1.90555	1.74414	2.48104	3.0309	1.24861	1.58877	0.743563	1.10859	1.47593	1.48209	2.05836	1.26907	0.820491	0.994263	0.886703	1.60154	0.970497	0.808862	1.33279	0.628469	0.0134527	-0.587331	down
ENSG00000175445	LPL	3485	3927	7165	5969	5493	5357	3113	5351	6796	4940	4721	2933	4153	1642	4921	2853	2371	1822	3734	3411	24.7778	27.2328	43.7226	40.6059	35.4328	37.5957	19.1803	30.8963	48.7202	26.5417	28.96	20.7382	30.9357	11.7555	31.2449	21.4117	18.5916	12.5701	26.5009	21.1731	0.00376315	-0.588142	down
NewGene_2474	NewGene_2474	121	88	151	97	37	54	61	65	76	232	44	84	26	99	34	43	21	91	83	94	1.98394	1.38773	1.05676	1.56776	0.544283	0.85629	0.863236	0.797707	1.38154	2.94326	0.61561	1.39194	0.430817	1.60225	0.458916	0.744339	0.359447	1.49237	1.36161	1.37222	0.0424813	-0.589046	down
ENSG00000163673	DCLK3	58	105	218	208	270	234	107	217	286	121	175	84	129	58	162	111	96	112	143	87	0.269001	0.491052	0.897396	0.953705	1.17928	1.11181	0.445944	0.820222	1.39368	0.439173	0.726619	0.399073	0.649957	0.271923	0.696449	0.548315	0.506366	0.506539	0.687433	0.363842	0.0315697	-0.590187	down
ENSG00000101203	COL20A1	72	83	167	187	137	123	83	92	223	150	86	65	51	64	98	126	52	55	192	54	0.424975	0.720662	0.80506	1.28294	1.28215	0.736031	0.725938	0.610727	1.68546	1.0473	0.81683	0.423943	0.277774	0.356258	0.816686	1.01826	0.339593	0.33095	1.68269	0.186744	0.0228431	-0.591487	down
ENSG00000197971	MBP	2712	3287	4391	3999	4953	4542	2529	4576	5832	3599	3058	1949	2509	1825	2927	2482	1954	2312	4187	2498	20.2307	27.1649	34.0151	37.6665	41.1672	43.0712	15.9942	33.9585	54.8727	21.3429	21.191	16.0557	22.5437	11.5153	19.3478	19.5445	18.0841	14.7262	33.7302	16.0819	0.000350453	-0.592409	down
ENSG00000101298	SNPH	554	486	985	815	585	578	748	952	697	664	537	105	522	354	316	532	443	501	606	487	2.67404	2.69818	4.32146	3.9274	2.69134	2.91065	3.41441	3.71945	3.49953	2.91701	2.27433	0.959921	2.72172	1.78519	1.42578	2.79251	2.39861	2.39388	2.97252	2.03256	0.0055952	-0.596416	down
NewGene_2139	NewGene_2139	70	94	299	294	151	175	316	358	219	488	194	72	87	164	143	157	237	95	175	130	1.01141	1.37544	3.86854	4.28146	2.08023	2.6125	4.15085	4.24543	3.36439	5.63451	2.51443	1.08367	1.36155	2.43429	1.92361	2.44492	3.95474	1.34763	2.63328	1.70616	0.0374816	-0.597769	down
ENSG00000197977	ELOVL2	214	256	311	316	330	345	559	557	526	539	204	265	203	216	208	216	356	225	327	149	1.35277	1.63889	1.74722	1.97855	1.96385	2.23702	3.1864	2.86852	3.49324	2.6759	1.15193	1.72899	1.3958	1.38946	1.2188	1.46573	2.58242	1.38946	2.1429	0.852349	0.00388775	-0.598889	down
ENSG00000185668	POU3F1	55	29	95	92	113	100	34	94	133	63	69	44	30	41	37	60	50	25	112	44	0.629335	0.3375	0.970616	1.04779	1.22474	1.18759	0.352657	0.878767	1.60629	0.571917	0.715439	0.523548	0.370295	0.474943	0.388257	0.73382	0.656673	0.278175	1.34418	0.460443	0.0427998	-0.599863	down
ENSG00000143994	ABHD1	188	202	320	293	167	157	314	323	191	220	120	128	120	143	220	114	209	98	135	162	3.70854	4.09992	5.21349	6.27482	3.37437	3.54225	5.98864	5.01403	4.14723	3.38232	2.23269	2.84715	2.65242	3.13556	3.86943	2.48037	4.62301	2.14733	2.51166	2.66547	0.00304922	-0.600714	down
ENSG00000140678	ITGAX	166	41	66	70	87	51	68	73	142	187	35	50	58	83	63	62	41	79	46	63	0.916745	0.225521	0.313329	0.434662	0.453819	0.298114	0.347426	0.352324	0.799741	0.882981	0.181779	0.273083	0.339566	0.490403	0.312106	0.37135	0.250599	0.415243	0.271188	0.303871	0.0106836	-0.603601	down
ENSG00000101187	SLCO4A1	273	213	434	411	435	436	340	377	403	306	312	192	302	83	258	250	165	197	315	212	2.3948	1.93556	3.54297	3.71882	3.92311	4.22791	2.76342	2.79663	3.72126	2.13715	2.78165	1.78418	3.04303	0.771267	2.17005	2.4846	1.88568	1.82514	2.9638	1.79969	0.00350018	-0.605214	down
NewGene_7543	NewGene_7543	421	321	185	133	125	97	165	179	130	288	60	100	71	122	110	82	108	359	111	148	8.66797	6.61597	3.55101	3.09557	2.41438	2.16649	3.2373	3.22578	2.96116	4.92323	1.05079	2.01077	1.64173	2.85518	2.3404	2.00407	2.45044	7.52854	2.30513	2.48301	0.042359	-0.605702	down
NewGene_342	NewGene_342	432	437	947	827	851	721	321	293	605	693	360	411	503	276	285	314	357	298	546	510	1.61474	2.33211	3.57563	3.30124	3.457	3.24256	1.01452	0.921386	3.11926	2.76081	1.45041	2.2351	2.3683	1.27006	1.12488	1.43425	1.91332	1.56851	2.68389	2.05818	0.00669343	-0.607269	down
ENSG00000188716	DUPD1	108	169	235	199	56	65	208	241	152	188	110	174	146	93	40	56	133	45	54	110	4.12809	6.50097	7.94149	7.50559	2.01159	2.53472	7.15204	7.4713	6.05142	5.60099	3.75436	6.82514	6.05039	3.59588	1.38427	2.26612	5.81998	1.67344	2.13131	3.81223	0.0498667	-0.607777	down
NewGene_7790	NewGene_7790	703	804	538	447	727	635	505	666	1034	1016	333	370	485	225	395	283	234	275	571	1391	4.63598	5.35962	3.1421	2.90517	4.50647	4.29324	2.99851	3.61505	7.16222	5.24206	1.99013	2.51637	3.47068	1.50539	2.40981	2.01995	1.79219	1.77188	3.89797	8.3129	0.0112597	-0.608961	down
ENSG00000124507	PACSIN1	321	335	412	343	702	652	767	824	341	346	334	251	522	266	177	469	268	195	334	353	1.90657	2.0095	2.17741	1.99324	3.92175	3.99115	4.0945	3.97371	2.10906	1.59578	1.75723	1.5227	3.38418	1.60479	0.961863	2.99315	1.82358	1.12301	2.05043	1.91015	0.0123668	-0.609459	down
ENSG00000115165	CYTIP	740	589	210	176	812	626	445	608	946	879	270	420	181	232	279	308	257	814	345	717	9.5303	7.84933	2.56067	2.01727	9.71758	7.75003	5.32692	7.06704	12.9301	9.80409	2.97399	5.29462	2.33121	2.8251	3.14731	4.24438	3.68551	10.6491	5.03741	8.46589	0.0293013	-0.611101	down
ENSG00000173947	PIFO	254	214	216	251	248	202	434	410	275	362	67	139	74	289	359	211	93	177	226	156	2.46591	2.08117	1.96999	2.38375	2.25033	1.98776	3.76715	3.41202	2.77821	2.72817	0.577066	1.37623	0.771061	2.82529	3.20871	2.17317	1.01947	1.66496	2.25334	1.35889	0.0113243	-0.613316	down
ENSG00000188488	SERPINA5	1071	957	1407	1095	1316	1063	1256	1603	2100	2618	538	1353	429	783	499	576	1402	1038	933	918	12.1258	11.1303	13.9696	12.3102	13.9686	12.2909	12.7581	14.6701	25.0405	23.3735	5.58342	15.6268	5.31142	8.8975	5.15222	7.02229	18.3086	11.418	10.9615	9.30181	0.00597011	-0.620897	down
ENSG00000161649	CD300LG	342	237	1476	1294	1214	1018	607	942	747	517	582	294	736	276	853	403	556	588	401	441	3.42613	2.27274	13.0133	12.7019	11.1296	9.87526	5.34031	7.62458	7.82723	3.86793	4.88782	2.84117	7.77876	2.81717	7.50442	4.21282	6.31714	5.44776	3.979	3.85863	0.039753	-0.625172	down
ENSG00000139549	DHH	81	84	92	140	127	164	50	118	179	48	62	59	58	33	101	125	26	72	80	84	0.44531	0.559428	0.523682	0.776187	0.712504	0.921521	0.308801	0.515793	1.03049	0.200593	0.313307	0.413684	0.341064	0.182739	0.533613	0.756156	0.17252	0.486829	0.501679	0.454956	0.0249104	-0.627057	down
ENSG00000135697	BCO1	36	76	125	79	81	74	95	112	78	49	61	77	53	22	35	27	52	76	50	36	0.566114	0.757698	1.05684	0.799648	0.744028	0.718703	1.06559	0.935236	0.896697	0.409738	0.625581	0.751168	0.618651	0.208215	0.304629	0.326726	0.570913	0.891897	0.557001	0.30328	0.018849	-0.631375	down
ENSG00000129744	ART1	96	65	157	82	76	34	152	275	75	65	55	44	84	72	62	82	39	77	76	60	1.84557	1.25089	2.67465	1.56467	1.38085	0.656201	2.63191	4.31988	1.50255	0.968472	0.948036	0.867661	1.74707	1.40058	1.09784	1.6916	0.841225	1.4519	1.50653	1.0496	0.0203984	-0.63206	down
NewGene_8173	NewGene_8173	67	64	73	80	98	100	124	68	88	144	79	45	72	33	67	37	63	77	45	16	2.76729	2.64351	2.79243	3.23328	3.84674	4.15822	4.51398	2.30837	3.88365	4.77383	2.93458	1.81932	3.31938	1.36499	2.48186	1.52058	2.98366	3.08221	2.01599	0.580182	0.0169796	-0.636337	down
ENSG00000123689	G0S2	1146	1185	537	517	974	1135	1997	1386	896	1672	581	1059	472	683	426	329	889	905	864	588	33.5776	35.0522	13.9293	14.9267	26.7945	33.9948	52.5923	32.971	27.4432	38.3173	15.214	31.9527	14.9836	20.2595	11.5489	10.2867	29.7754	25.884	26.1954	15.6036	0.00965072	-0.637917	down
ENSG00000004468	CD38	119	180	988	816	462	394	602	841	1082	544	613	354	506	223	280	252	455	228	244	350	0.529288	0.809703	3.95554	3.60145	1.95155	1.82345	2.42148	3.08242	5.07511	1.90277	2.45145	1.63229	2.46765	1.0503	1.17679	1.20609	2.32782	1.03807	1.12876	1.41864	0.0432796	-0.642674	down
ENSG00000123612	ACVR1C	76	45	86	55	67	123	79	123	142	132	71	75	58	31	27	27	44	61	105	56	0.212207	0.127844	0.216187	0.151855	0.176317	0.354134	0.199793	0.28148	0.418571	0.291012	0.176889	0.216966	0.177081	0.087188	0.070053	0.07921	0.141861	0.166512	0.30412	0.141763	0.0110728	-0.647736	down
ENSG00000254445	HSPB2-C11orf52	226	215	429	229	317	193	300	398	58	155	156	120	65	103	147	134	170	183	160	320	3.761	3.62237	6.81986	4.64557	5.89032	4.28003	4.49251	5.95742	1.00055	2.37192	2.82153	2.0518	1.16481	2.37476	2.85363	2.38206	3.24389	3.65659	2.75071	5.30798	0.0194106	-0.650874	down
ENSG00000168071	CCDC88B	194	90	68	76	55	39	90	94	171	265	51	75	14	97	56	129	66	69	57	48	1.00017	0.469154	0.319404	0.559132	0.264105	0.204383	0.416992	0.392692	0.979652	1.06676	0.59917	0.394013	0.07467	0.507023	0.264132	0.710436	0.387459	0.347845	0.300933	0.221593	0.0353823	-0.654839	down
ENSG00000135333	EPHA7	179	178	280	217	217	261	178	230	159	108	112	109	179	63	168	113	77	125	80	215	0.693091	0.691124	0.954835	0.841918	0.802224	1.06408	0.614187	0.723071	0.64747	0.323615	0.385515	0.439109	0.74823	0.244412	0.594723	0.464083	0.341703	0.47139	0.315224	0.768969	0.00330483	-0.661153	down
ENSG00000130037	KCNA5	172	186	487	634	515	515	231	453	516	337	429	236	331	125	288	313	154	171	218	188	1.55621	1.70029	3.90427	5.66131	4.38466	4.76861	1.87554	3.33229	4.88558	2.38823	3.46958	2.19936	3.25001	1.1396	2.41289	3.03095	1.58761	1.51229	2.04278	1.53899	0.0124162	-0.661188	down
NewGene_2178	NewGene_2178	47	37	49	72	40	33	67	54	36	44	53	59	13	13	28	9	39	29	17	20	1.92672	1.48855	1.74906	2.95506	1.59529	1.4201	2.34786	1.83898	1.4611	1.38838	1.89243	2.34326	0.483998	0.508471	1.06365	0.353588	1.85911	1.03817	0.676097	0.724712	0.0408783	-0.669229	down
ENSG00000185634	SHC4	106	88	76	119	111	148	83	132	195	135	78	48	35	82	63	116	38	63	127	81	0.588031	0.491858	0.417079	0.651587	0.61302	0.857959	0.42467	0.616539	1.16867	0.625152	0.386658	0.271557	0.205706	0.483753	0.31994	0.701356	0.24053	0.338136	0.761116	0.403963	0.00123404	-0.670528	down
NewGene_5328	NewGene_5328	524	531	161	135	138	83	711	820	477	600	161	223	276	160	261	263	224	277	322	212	3.58049	3.6173	1.41688	1.78947	2.32677	1.33223	3.75318	4.10389	3.51334	2.86502	2.10878	3.06597	2.40801	2.10529	2.46626	2.86609	1.70221	3.99634	2.12091	2.61544	0.0323134	-0.674633	down
ENSG00000142661	MYOM3	2371	2392	4909	4579	6575	6531	2333	3969	3416	3303	2245	3365	2486	1384	4196	2710	2151	1522	1901	2402	10.3869	10.8163	19.026	19.8043	27.0086	29.7225	9.43637	14.5325	15.689	11.6481	10.0767	15.1604	12.3474	6.14464	18.654	13.4571	11.3934	6.73197	8.59931	10.0105	0.00563862	-0.677022	down
ENSG00000176076	KCNE5	406	388	145	118	237	240	224	223	107	107	141	130	45	79	126	59	122	157	291	210	6.9828	6.7393	2.21374	1.9954	3.83212	4.22161	3.46536	3.11052	1.92403	1.43946	2.16537	2.30072	0.832586	1.37055	2.00149	1.07452	2.38681	2.63957	5.17932	3.26324	0.0323954	-0.679199	down
NewGene_7108	NewGene_7108	128	146	166	125	185	177	193	241	35	41	70	61	69	69	108	88	143	86	68	76	1.42109	1.90878	1.67831	1.50182	1.98293	2.10776	2.29397	2.54845	0.523442	0.373493	0.710936	0.705727	1.02929	1.15739	1.1928	1.13325	2.13525	1.05707	0.83928	0.857663	0.029516	-0.690327	down
ENSG00000107147	KCNT1	98	157	152	158	160	106	133	236	220	207	49	121	81	88	80	114	116	89	106	90	0.415405	0.753096	0.500408	0.680391	0.789408	0.387714	0.549726	0.912821	0.881236	0.746344	0.207426	0.601525	0.326405	0.325035	0.264449	0.584063	0.582415	0.311393	0.392953	0.334562	9.59E-05	-0.690769	down
ENSG00000162494	LRRC38	924	1069	2461	2006	1747	1753	1731	2091	877	689	907	1318	1351	535	643	574	1202	1212	574	511	10.6115	12.4018	25.0549	22.7345	18.8523	20.5914	17.8689	19.5023	10.5334	6.19035	9.31022	15.5965	16.8358	6.22607	6.82829	7.04857	15.7868	13.5946	6.81912	5.30916	0.015282	-0.692552	down
ENSG00000142449	FBN3	27	53	98	90	47	39	51	83	109	63	40	29	29	30	23	78	12	11	90	59	0.073136	0.144962	0.233619	0.240225	0.118211	0.107226	0.122486	0.180668	0.344965	0.133348	0.095279	0.079468	0.084129	0.080354	0.056832	0.224058	0.035942	0.028732	0.251216	0.142591	0.0317446	-0.692576	down
NewGene_11802	NewGene_11802	174	150	149	95	42	67	114	88	26	71	31	77	49	34	21	54	80	115	31	79	1.22938	1.07526	0.856277	0.742171	0.252468	0.639356	0.662223	0.510172	0.17384	0.382436	0.198812	0.511029	0.408948	0.21994	0.183988	0.382368	0.751718	0.736979	0.235497	0.463646	0.0468566	-0.693272	down
ENSG00000160593	JAML	189	94	84	59	107	68	90	59	180	345	54	87	15	84	77	62	59	128	57	103	2.86264	1.22866	1.10128	0.748826	1.37541	0.901578	1.33553	0.785352	2.63941	3.5153	0.606996	1.15454	0.20243	1.10567	1.20073	0.958238	0.844362	1.83278	0.767899	1.21598	0.0221343	-0.694515	down
ENSG00000231274	SBK3	64	73	98	94	59	63	179	179	133	81	58	64	36	31	36	68	76	87	93	37	1.30596	1.6242	1.78182	1.84222	1.19515	1.43679	3.47662	3.20077	2.85828	1.29717	1.09534	1.29985	0.779907	0.718214	0.665338	1.46157	1.81643	1.84888	2.35605	0.713105	0.00965209	-0.695552	down
NewGene_1481	NewGene_1481	123	157	303	206	185	239	263	257	153	246	166	44	135	61	120	37	311	87	90	95	1.63146	2.10326	3.55602	2.68651	2.30332	3.24238	3.12848	2.76484	2.11421	2.54955	1.9565	0.590514	1.93641	0.809079	1.46094	0.52485	4.70767	1.11486	1.22759	1.13105	0.0426604	-0.69776	down
ENSG00000126860	EVI2A	146	86	69	91	157	97	68	64	188	249	22	46	46	170	43	42	40	98	47	169	1.98929	1.17963	0.836626	1.22484	2.00776	1.34831	0.826826	0.707982	2.68594	2.65596	0.260083	0.647208	0.671379	2.34828	0.542903	0.607222	0.614712	1.31279	0.656321	2.08686	0.0333942	-0.699017	down
NewGene_2755	NewGene_2755	23	28	214	181	87	101	81	93	136	149	39	33	35	60	58	107	33	73	144	71	0.135801	0.170836	1.1277	1.06183	0.482478	0.609377	0.430467	0.44683	0.843514	0.692918	0.203155	0.198984	0.223783	0.356275	0.314136	0.680803	0.222867	0.443434	0.930071	0.381464	0.0387718	-0.699917	down
ENSG00000136872	ALDOB	47	61	79	85	73	79	121	103	44	33	69	49	44	17	54	18	59	33	44	29	0.487138	0.631765	0.823008	0.866908	1.01064	1.21663	1.57446	1.24043	0.523179	0.28952	0.769966	0.517449	0.67726	0.174627	0.713403	0.196998	1.08945	0.456487	0.572669	0.265817	0.0230339	-0.706583	down
ENSG00000136867	SLC31A2	115	96	169	80	58	67	255	113	117	133	59	94	78	76	36	93	58	62	81	54	1.62207	1.36471	2.12253	1.1136	0.768542	0.970772	3.25127	1.29923	1.72965	1.4683	0.747626	1.36395	1.1889	1.08262	0.460594	1.40017	0.935352	0.857363	1.18023	0.694923	0.00265191	-0.709694	down
ENSG00000175463	TBC1D10C	122	27	80	54	26	37	41	55	45	119	25	36	9	41	20	22	35	93	23	37	1.85446	0.373015	1.07676	0.8161	0.340598	0.525318	0.524819	0.648715	0.714031	1.30985	0.299693	0.522186	0.135557	0.578216	0.242335	0.330187	0.556886	1.37729	0.322334	0.512202	0.0375821	-0.712716	down
ENSG00000236279	CLEC2L	106	67	200	194	144	154	323	328	196	238	135	116	189	87	129	77	108	72	104	57	1.97844	1.25969	3.30072	3.56267	2.51085	2.91674	5.39312	4.9594	3.81097	3.47068	2.24389	2.22198	3.81708	1.63769	2.21189	1.52287	2.29359	1.30855	1.99802	0.949817	0.00674969	-0.719563	down
ENSG00000153234	NR4A2	110	147	206	154	165	147	107	184	332	252	146	82	85	69	111	98	72	83	143	134	0.834115	1.13006	1.38993	1.16949	1.14219	1.09197	0.844138	1.10242	2.55117	1.45921	0.979044	0.633207	0.677881	0.530649	0.776515	0.805675	0.614585	0.608285	1.0951	0.8995	4.52E-05	-0.73718	down
ENSG00000149573	MPZL2	191	283	160	174	835	738	195	345	363	250	312	187	121	150	230	206	152	111	212	444	2.02529	2.80386	1.46039	1.7244	7.81933	7.50601	1.78851	2.75866	3.73571	1.98062	2.71219	1.87028	1.33205	1.55727	2.11294	2.19546	1.74527	1.04814	2.18987	3.98302	0.0189399	-0.754501	down
ENSG00000176204	LRRTM4	73	71	87	100	133	92	162	181	152	159	52	74	37	103	28	53	71	109	49	97	0.533797	0.53479	0.581706	0.715053	0.920503	0.682588	1.07954	1.12054	1.15808	0.90167	0.32477	0.568749	0.290647	0.802686	0.1896	0.406339	0.608018	0.779011	0.349968	0.662951	0.00121953	-0.759347	down
ENSG00000064787	BCAS1	45	126	172	144	237	230	40	87	116	146	136	60	80	39	63	109	81	20	137	36	0.252917	0.891084	1.03531	0.854163	1.4906	1.56099	0.146988	0.292653	0.503602	0.818175	0.843795	0.385172	0.543378	0.302152	0.371091	0.775941	0.658331	0.077963	0.957253	0.133189	0.037233	-0.760576	down
ENSG00000154027	AK5	165	154	142	149	308	213	335	394	278	214	217	157	88	91	123	137	120	109	181	82	1.2855	1.2079	0.976047	1.14748	2.25198	1.86576	2.37813	2.53767	2.30673	1.33117	1.50717	1.25578	0.742502	0.714319	0.881771	1.13717	1.15138	0.826078	1.45968	0.573722	0.000670009	-0.764839	down
ENSG00000109956	B3GAT1	51	26	47	40	62	69	39	50	129	63	47	17	19	13	24	47	32	27	66	30	0.353753	0.165727	0.27919	0.272099	0.387563	0.446265	0.221246	0.277851	0.904785	0.340211	0.289706	0.104448	0.130595	0.088791	0.149078	0.315785	0.239924	0.177351	0.457008	0.18346	0.0104313	-0.766671	down
ENSG00000100292	HMOX1	1204	1359	1906	2052	1515	1373	1957	2953	1193	1593	934	1401	1005	918	775	598	986	727	996	1059	16.7659	19.1173	23.5183	28.1994	19.8246	19.5438	24.4913	33.3957	17.3777	17.3547	11.6226	20.1091	15.1796	12.9562	9.9807	8.89328	15.695	9.88339	14.3539	13.3521	1.16E-05	-0.767735	down
ENSG00000186417	GLDN	109	97	236	242	260	236	133	222	327	163	148	86	98	44	151	90	104	85	182	146	0.61925	0.608851	1.18598	1.3621	1.35293	1.29675	0.669527	1.01054	1.98127	0.649699	0.801901	0.565195	0.67973	0.300096	0.828658	0.778757	0.697524	0.651562	1.14848	0.741545	0.00194517	-0.774953	down
ENSG00000130035	GALNT8	581	464	440	306	439	442	386	609	494	745	71	308	232	296	241	329	187	296	438	303	2.54039	2.22995	1.7645	1.42529	1.85847	2.23047	1.47292	2.18076	2.31312	2.66612	2.75962	1.46437	1.4895	1.39106	2.41214	1.57841	2.07709	1.5675	1.95962	1.71553	3.07E-05	-0.784775	down
ENSG00000198223	CSF2RA	75	42	27	36	52	48	49	62	82	141	8	23	8	51	23	57	28	49	28	61	0.919584	0.467798	0.297952	0.382558	0.540336	0.627952	0.537185	0.570954	0.965698	1.47303	0.090868	0.25967	0.094962	0.622426	0.231763	0.714199	0.352106	0.542296	0.340691	0.697087	0.0137886	-0.786345	down
ENSG00000170345	FOS	518	616	318	309	613	527	1285	944	1229	1778	551	315	272	543	330	675	191	452	388	704	6.16554	7.386	3.39391	3.73317	6.85983	6.47604	13.7779	9.16758	15.2008	16.4903	5.84654	3.90441	3.52643	6.58949	3.58538	8.55974	2.64588	5.27218	4.83017	7.63208	0.00129838	-0.799702	down
ENSG00000165186	PTCHD1	57	44	108	52	45	36	157	158	272	284	57	57	60	29	43	51	117	54	60	62	0.104492	0.080616	0.175937	0.094746	0.077661	0.068051	0.260052	0.237092	0.526407	0.410201	0.093354	0.108613	0.119347	0.053029	0.073177	0.100598	0.246389	0.096938	0.113849	0.103778	0.0241249	-0.807296	down
ENSG00000121807	CCR2	60	55	47	53	51	37	25	42	146	159	17	23	14	42	27	67	18	77	36	37	0.578216	0.543672	0.468219	0.574798	0.52336	0.411739	0.222906	0.330253	1.51793	1.20991	0.138763	0.217188	0.130713	0.447958	0.236511	0.783037	0.184981	0.726085	0.362836	0.347472	0.012348	-0.821553	down
ENSG00000105227	PRX	765	915	1223	1401	1344	1200	800	1473	2243	847	713	468	620	454	692	954	449	433	1305	564	3.73322	4.50376	5.343	6.94116	6.1933	5.95493	3.62054	5.97794	11.7266	3.43765	2.93867	2.32008	3.23868	2.33602	3.27215	5.29806	2.61529	1.94862	6.73729	2.45339	0.000127739	-0.824816	down
NewGene_286	NewGene_286	86	79	57	34	93	68	64	111	158	213	28	53	22	54	16	65	40	62	67	103	1.3739	1.14331	0.724198	0.632055	1.31072	1.39522	0.985134	1.29846	2.736	2.66421	0.394626	1.11401	0.326724	1.04474	0.191975	0.972062	0.742415	0.878997	1.10225	1.33611	0.00328325	-0.830881	down
ENSG00000118271	TTR	237	276	117	119	316	283	297	278	440	481	77	65	72	107	238	85	188	218	325	92	6.24075	7.3869	2.68757	3.07785	7.85562	7.64418	7.0579	5.96174	12.1614	9.95072	1.79537	1.74388	2.03225	2.85578	5.81266	2.36773	5.69856	5.47693	8.91682	2.18976	0.00736404	-0.835581	down
ENSG00000139410	SDSL	35	48	84	65	67	65	256	201	92	137	40	104	25	62	32	105	30	63	37	58	0.582767	0.819938	1.33741	1.11531	1.2648	1.15763	4.25765	2.96844	1.72401	1.8879	0.602991	1.87388	0.448567	1.08757	0.499948	1.95715	0.581464	1.05369	0.714782	0.93771	0.0101078	-0.843907	down
ENSG00000147588	PMP2	112	190	245	272	283	307	136	310	510	193	122	123	108	103	149	158	143	82	187	184	0.78469	1.34971	1.52186	1.88628	1.87376	2.20588	0.859405	1.77271	3.74624	1.06004	0.761424	0.886569	0.821282	0.729165	0.964899	1.18478	1.14273	0.557408	1.36013	1.16707	0.000239303	-0.847569	down
ENSG00000214050	FBXO16	87	93	92	92	59	86	121	132	71	51	47	59	50	47	24	45	25	47	78	55	1.6353	1.81558	1.67809	1.71795	1.18612	1.92603	1.44084	1.99533	1.61362	0.740971	0.783178	1.45365	1.16675	1.04783	0.465837	0.926822	0.588766	0.892746	1.60727	0.952837	4.56E-05	-0.850584	down
ENSG00000182162	P2RY8	167	79	345	447	376	299	341	587	427	196	326	165	222	73	167	124	172	85	229	120	1.17332	0.500086	2.16379	3.02925	2.33176	1.89594	1.9996	3.46351	3.01158	1.1125	1.83142	1.12005	1.53367	0.442014	0.967858	0.798873	1.24905	0.875037	1.67525	0.686963	0.00563349	-0.853648	down
ENSG00000160862	AZGP1	86	115	67	110	167	132	64	142	185	58	66	66	52	64	45	66	39	53	99	56	1.58536	2.01002	0.860792	1.95559	2.33763	2.25585	1.04682	1.98121	3.09182	0.753704	1.09929	1.08475	0.969132	0.966832	0.773975	1.17168	0.670317	0.886816	1.57201	0.877091	0.000237146	-0.860825	down
ENSG00000120057	SFRP5	219	369	368	315	517	473	335	661	592	317	121	256	131	183	190	318	193	229	340	252	3.0148	5.1398	4.50311	4.29496	6.7013	6.68558	4.15682	7.41273	8.55332	3.41997	1.48914	3.63252	1.96042	2.56172	2.42144	4.69217	3.04794	3.08268	4.86111	3.15058	2.16E-05	-0.860953	down
ENSG00000173166	RAPH1	35	66	110	67	65	71	95	112	86	47	10	16	43	43	41	70	41	51	33	46	0.252559	0.236404	0.351966	0.496184	0.159339	0.225186	0.253755	0.320968	0.755202	0.173242	0.018904	0.138057	0.198623	0.112189	0.340969	0.455736	0.119541	0.335488	0.204939	0.117822	0.00202875	-0.867037	down
NewGene_2484	NewGene_2484	389	315	904	657	406	491	534	616	415	532	222	329	383	210	108	257	247	419	128	381	1.07167	0.876656	2.20791	1.78705	1.05148	1.38362	1.32271	1.3786	1.19464	1.14695	0.545973	0.934905	1.14606	0.586024	0.273419	0.757209	0.778531	1.12767	0.364161	0.950407	0.000139876	-0.887295	down
ENSG00000122254	HS3ST2	195	159	46	89	45	38	75	82	35	75	21	55	32	43	12	30	27	109	38	78	2.13439	1.74883	0.437852	0.953763	0.453226	0.419912	0.729539	0.717248	0.394025	0.634501	0.201822	0.605179	0.372501	0.473753	0.121697	0.347431	0.329207	1.1578	0.424572	0.771266	0.0153082	-0.888162	down
ENSG00000196169	KIF19	77	84	115	121	136	139	68	196	218	92	77	48	42	26	79	58	57	48	132	77	0.543888	0.597713	0.721256	0.831396	0.893793	1.02589	0.443673	1.10821	1.58717	0.5042	0.476542	0.341533	0.310087	0.182211	0.525384	0.429451	0.445629	0.320564	0.94693	0.481027	0.000579324	-0.888984	down
ENSG00000271503	CCL5	225	102	144	168	111	88	109	53	137	291	45	35	29	66	89	62	68	183	41	98	4.23829	1.92307	2.3622	3.08929	1.94437	1.65767	1.82569	0.794514	2.77864	4.21379	0.745524	0.653588	0.56759	1.2295	1.54652	1.2507	1.43029	3.31892	0.779098	1.64448	0.00296849	-0.902109	down
ENSG00000197181	PIWIL2	42	37	104	94	190	178	81	198	356	318	84	31	16	98	24	131	59	68	147	161	0.203102	0.184466	0.460087	0.462726	0.879219	0.90596	0.355962	0.793061	1.84164	1.31083	0.368857	0.15722	0.082273	0.489583	0.107603	0.690187	0.32903	0.343891	0.752423	0.72129	0.0216965	-0.902986	down
ENSG00000106366	SERPINE1	121	91	305	345	172	199	98	240	886	740	207	170	117	60	176	136	74	70	325	208	0.958049	0.730484	2.14803	2.70246	1.28489	1.61655	0.699732	1.54838	7.36905	4.60207	1.46543	1.38889	1.00573	0.477937	1.29137	1.15506	0.668675	0.541438	2.67189	1.49842	0.00938285	-0.93619	down
NewGene_3521	NewGene_3521	171	198	118	132	81	41	130	164	169	39	47	8	40	62	73	113	74	44	67	88	0.898836	1.24561	0.598962	1.12349	0.406959	0.242265	0.784711	0.807297	0.955793	0.204087	0.242284	0.046808	0.184961	0.311248	0.28947	0.725915	0.496723	0.202922	0.389931	0.386347	0.00528024	-0.954458	down
NewGene_6138	NewGene_6138	31	15	275	262	164	127	65	99	9	30	56	42	77	30	63	58	27	24	62	117	0.376313	0.176756	3.13466	3.20093	1.8802	1.58574	0.804666	0.979195	0.14793	0.279601	0.611948	0.528625	1.01555	0.368494	0.91051	0.752281	0.364668	0.284998	0.778203	1.31199	0.045558	-0.967578	down
ENSG00000131203	IDO1	43	25	109	128	110	99	35	74	273	180	25	22	31	100	47	115	36	37	53	43	0.541652	0.300973	1.24428	1.9257	1.29813	1.31986	0.504698	0.871547	4.1349	1.76667	0.263802	0.274297	0.418102	1.50868	0.637821	1.82678	0.486917	0.547747	0.705304	0.475997	0.00665655	-0.999116	down
ENSG00000197471	SPN	108	42	89	103	55	46	47	29	110	75	36	19	16	52	35	37	18	52	19	60	0.523833	0.153597	0.508214	0.797718	0.187278	0.381987	0.213489	0.084347	0.752893	0.308623	0.115835	0.068364	0.065703	0.311625	0.193393	0.14419	0.072922	0.184265	0.071968	0.198573	0.000392473	-0.999527	down
NewGene_3224	NewGene_3224	193	200	364	260	205	245	250	294	187	298	190	145	113	123	90	135	80	113	88	99	1.68541	1.76252	2.81585	2.24097	1.67927	2.18359	1.96024	2.08411	1.70583	2.0328	1.48473	1.30067	1.06392	1.08416	0.728223	1.26036	0.79236	0.96228	0.795094	0.779044	1.16E-10	-1.00989	down
ENSG00000007171	NOS2	22	37	170	132	89	81	119	180	228	136	133	17	54	22	59	36	78	28	61	30	0.128348	0.225004	0.913638	0.789577	0.505698	0.49813	0.648913	0.884281	1.44496	0.642193	0.719804	0.106426	0.352609	0.133208	0.327016	0.231247	0.541467	0.163168	0.379038	0.16077	0.00752328	-1.04283	down
ENSG00000170075	GPR37L1	57	63	59	101	103	135	40	72	94	36	27	37	39	9	66	21	15	42	74	28	0.218169	0.2449	0.198115	0.382089	0.370267	0.528965	0.137117	0.223318	0.378363	0.10632	0.09194	0.145515	0.160609	0.033797	0.232221	0.083243	0.065843	0.154866	0.291861	0.094819	0.00170002	-1.07251	down
ENSG00000146477	SLC22A3	1034	1195	1718	1393	1562	1354	697	1163	1763	1246	526	616	484	521	504	634	529	515	997	638	7.83458	9.14975	11.5403	10.4174	11.1187	10.4888	4.74277	7.15406	13.9793	7.38271	3.56129	4.80683	3.97408	4.0004	3.5293	5.13678	4.57888	3.81179	7.81498	4.38009	1.37E-11	-1.07969	down
NewGene_6738	NewGene_6738	75	55	93	88	94	122	101	102	101	53	8	11	15	6	24	18	106	52	58	79	1.06559	0.7873	1.17137	1.23787	1.2516	1.76653	1.29365	1.17031	1.50358	0.584781	0.09394	0.159173	0.231141	0.079285	0.304453	0.265975	1.72785	0.721331	0.851286	1.00885	0.0117688	-1.11012	down
ENSG00000165443	PHYHIPL	31	30	65	50	68	317	61	59	593	156	58	42	26	51	44	47	42	36	206	78	0.216883	0.214268	0.43946	0.343865	0.44998	2.29742	0.384245	0.33674	4.40134	0.860403	0.366934	0.302835	0.197209	0.363391	0.285274	0.356439	0.333138	0.243679	1.53856	0.496991	0.0195958	-1.14499	down
ENSG00000187624	C17orf97	182	140	159	176	52	53	178	217	118	201	39	57	50	67	64	67	82	44	60	75	2.50026	1.94005	1.97094	2.39296	0.745163	0.738735	2.49668	2.44753	1.7031	2.24749	0.4842	0.83855	0.739661	0.935814	0.807363	0.985795	1.33546	0.586511	0.961826	0.926316	5.08E-07	-1.16369	down
ENSG00000176402	GJC3	39	54	97	86	137	128	61	86	165	76	41	25	36	11	47	40	41	24	89	43	0.881405	1.21791	1.94462	1.92802	2.91272	2.96269	1.24403	1.58554	3.91244	1.34654	0.819065	0.578688	0.876507	0.236014	0.977226	0.96468	1.0493	0.519217	2.07511	0.866341	0.000166203	-1.16853	down
ENSG00000174607	UGT8	55	85	108	108	137	211	49	85	179	43	75	24	41	30	40	56	23	21	112	52	0.362111	0.531452	0.598272	0.681937	0.80821	1.34253	0.269463	0.419598	1.22024	0.205365	0.414172	0.149595	0.279495	0.188904	0.248609	0.371517	0.16066	0.125983	0.729475	0.312551	0.00065728	-1.16938	down
ENSG00000088756	ARHGAP28	319	372	653	96	533	530	400	583	618	621	51	60	535	42	459	76	48	86	58	589	1.70797	1.90049	2.95939	1.04402	2.43471	2.60157	1.75382	2.31839	3.41616	2.40117	0.405562	0.668571	2.8972	0.468709	2.311	0.897366	0.599956	1.06902	0.649215	2.70518	0.0241312	-1.17128	down
ENSG00000158887	MPZ	1040	1945	3701	4041	5244	4605	1682	3832	6240	1655	2183	1014	1649	459	1804	1498	1113	791	2737	1112	13.556	25.5916	42.6241	52.4161	64.2307	61.3346	20.0308	40.6934	85.0095	16.9337	25.7171	13.8857	23.2656	6.05836	22.1183	20.7752	16.784	10.1543	37.3518	13.1125	0.000692698	-1.19271	down
ENSG00000164007	CLDN19	28	73	157	146	180	164	45	113	203	60	55	40	67	8	58	39	35	38	100	21	0.206157	0.599558	1.43733	1.22373	1.40742	1.60655	0.425641	0.820708	2.00734	0.441301	0.419265	0.369198	0.689751	0.071495	0.38602	0.299421	0.286425	0.279547	1.01374	0.228102	0.000898088	-1.28335	down
ENSG00000105695	MAG	43	56	122	116	105	123	20	96	158	27	51	31	48	8	48	30	21	13	56	25	0.449117	0.581327	1.13034	1.18795	1.02742	1.31332	0.181884	0.812657	1.72055	0.218229	0.471793	0.317768	0.537558	0.082983	0.45638	0.326499	0.24315	0.125767	0.600171	0.236882	0.000567946	-1.3377	down
ENSG00000184261	KCNK12	67	60	142	125	190	211	55	112	168	66	47	52	73	4	60	44	24	33	84	29	0.26966	0.245992	0.511864	0.50166	0.726264	0.879064	0.200928	0.369045	0.713125	0.209875	0.17061	0.214228	0.320071	0.015752	0.224585	0.189565	0.111056	0.128185	0.350563	0.105799	0.000223467	-1.37147	down
ENSG00000204936	CD177	113	178	14	10	89	66	63	91	155	95	0	31	10	44	26	52	30	44	30	58	1.28355	2.04309	0.137791	0.111183	0.96812	0.76542	0.670353	0.833894	1.84993	0.854878	0	0.363622	0.118236	0.506179	0.284909	0.619338	0.415698	0.49493	0.34578	0.591941	0.00372014	-1.38627	down
ENSG00000184454	NCMAP	102	256	382	490	514	577	152	370	732	262	165	113	158	39	186	151	151	98	206	129	0.648925	1.65472	2.16789	3.10076	3.09631	3.78533	0.876992	1.92793	4.91372	1.31205	0.941429	0.741003	1.09965	0.249469	1.10369	1.03634	1.10364	0.610955	1.3629	0.745961	1.24E-05	-1.39077	down
NewGene_6139	NewGene_6139	151	168	560	540	532	544	297	283	71	95	151	200	83	100	170	98	24	57	134	191	1.92012	2.11243	6.33185	6.97982	5.93905	7.01882	3.29438	2.67799	1.14097	0.951925	1.8471	2.37282	1.27468	1.23997	1.98614	1.35482	0.288239	0.710592	1.78359	1.99272	0.00012288	-1.46525	down
ENSG00000081277	PKP1	38	28	451	452	277	233	41	56	598	346	142	19	30	76	51	113	117	53	57	39	0.175522	0.130271	1.88373	2.1018	1.2248	1.10835	0.167781	0.210757	2.94455	1.25759	0.590232	0.088154	0.147258	0.35873	0.215765	0.558101	0.62016	0.240422	0.272564	0.163291	0.000479129	-1.72557	down
ENSG00000188536	HBA2	74089	5519	788	1166	1060	2107	6099	3356	1930	18604	1179	2660	1899	5790	1129	1810	1116	11312	2162	4062	3265.7	245.622	30.78	50.6463	43.861	94.9279	241.572	120.063	88.9418	641.1	46.3793	120.759	90.7616	258.57	46.0281	85.2757	56.2576	486.726	98.5483	162.105	0.0164556	-1.72588	down
ENSG00000244734	HBB	89115	6305	1000	1566	1711	3096	7639	4166	3262	22429	1776	3652	2919	5294	1288	1682	1162	13337	2178	7226	3528.9	251.975	29.7721	61.1276	59.2973	116.584	274.096	135.684	125.78	699.621	62.9269	150.021	116.682	209.607	45.5751	69.0074	48.9219	517.816	83.049	262.108	0.0131075	-1.73699	down
ENSG00000206172	HBA1	61201	4506	606	980	923	1798	5251	2809	1540	15835	1078	2089	1610	4598	902	1328	979	9202	1676	3235	2691.76	200.174	23.7007	42.5201	38.1363	80.8569	207.624	100.29	70.8222	545.414	42.3643	94.6786	76.8126	204.939	36.7334	62.4261	49.1991	395.335	76.2395	128.861	0.0139006	-1.76679	down
ENSG00000169245	CXCL10	209	34	60	45	122	48	65	57	355	270	27	49	29	10	7	31	35	17	66	36	4.49019	0.728512	1.14302	0.938812	2.46214	1.04855	1.25504	0.992424	8.01298	4.55139	0.520027	1.0706	0.673173	0.209391	0.139498	0.69748	0.859533	0.348154	1.45694	0.688309	8.87E-06	-1.89638	down
ENSG00000187957	DNER	648	562	252	261	645	555	518	755	834	613	43	81	38	80	26	126	212	263	180	409	5.03866	4.41907	1.73803	1.99865	4.71122	4.41813	3.62164	4.7731	6.78632	3.72841	0.294397	0.643273	0.318556	0.627634	0.181745	1.04444	1.88312	1.99893	1.44712	2.87881	2.83E-07	-1.90045	down
NewGene_8107	NewGene_8107	30	27	235	329	138	179	200	165	93	365	39	33	0	68	50	26	45	68	35	60	0.746891	0.687829	5.13617	7.96873	3.23175	4.51261	4.19174	3.19348	2.255	7.56522	0.928214	0.855303	0	1.62089	1.06107	0.652413	1.24333	1.63836	0.883751	1.39359	1.46E-05	-1.96561	down
ENSG00000272414	FAM47E-STBD1	206	250	84	179	25	131	160	6411	106	157	22	64	60	64	143	24	106	82	172	51	1.97057	3.19067	1.25585	1.69573	0.402802	1.72707	1.81857	43.6216	1.27424	1.42844	0.275867	0.965045	0.903936	0.727527	1.96547	0.42697	1.35187	1.24581	1.57684	0.515274	7.54E-05	-3.03624	down
