# Supplementary material for: Gene expression profiling of extraocular muscles in primary inferior oblique overaction
Source: PeerJ journal article supplement (doi:10.7717/peerj.19474), 2025-05-28
Supplement: TableS2.docx [file TableS2.docx]

Table S2 Enriched GO biological pathways and DEGs by ClueGO

| Term | ID | % Associated Genes | Nr. Genes | Associated Genes Found | Group PValue | regulated |
| --- | --- | --- | --- | --- | --- | --- |
| positive regulation of chemokine production | GO:0032722 | 4.00 | 3.00 | [HMOX1, LPL, MBP] | 0.0052 | up |
| heterotypic cell-cell adhesion | GO:0034113 | 4.62 | 3.00 | [GLDN, ITGAX, MBP] | 0.0103 | up |
| cell communication involved in cardiac conduction | GO:0086065 | 4.76 | 3.00 | [GJC3, KCNA5, KCNE5] | 0.0126 | up |
| response to cold | GO:0009409 | 5.77 | 3.00 | [CXCL10, FOS, LPL] | 0.0091 | up |
| oxygen carrier activity | GO:0005344 | 15.79 | 3.00 | [HBA1, HBA2, HBB] | 0.0014 | up |
| positive regulation of myelination | GO:0031643 | 15.00 | 3.00 | [ITGAX, MAG, NCMAP] | 0.0085 | up |
| regulation of T cell migration | GO:2000404 | 9.76 | 4.00 | [CCL5, CCR2, CXCL10, SPN] | 0.0003 | up |
| myelination | GO:0042552 | 7.09 | 10.00 | [BCAS1, DHH, ITGAX, MAG, MBP, MPZ, NCMAP, POU3F1, PRX, UGT8] | 0.0000 | up |
| positive regulation of mononuclear cell migration | GO:0071677 | 7.35 | 5.00 | [CCL5, CCR2, CXCL10, SERPINE1, SPN] | 0.0005 | up |
| collagen fibril organization | GO:0030199 | 5.45 | 6.00 | [COL11A1, COL11A2, COL22A1, COL25A1, COL9A2, SCX] | 0.0000 | down |
| negative regulation of signaling receptor activity | GO:2000272 | 5.48 | 4.00 | [GPRC5A, IGSF1, LYPD1, MTRNR2L8] | 0.0008 | down |
| atrial cardiac muscle cell action potential | GO:0086014 | 15.00 | 3.00 | [KCNJ3, SCN3B, SCN5A] | 0.0028 | down |

Test Used = Enrichment (Two-sided hypergeometric test), Group PValue Corrected with Bonferroni step down
